# Supplementary material
Source: publisher figshare collection journal article supplement (https://future-science-group.figshare.com/articles/dataset/_/21617601)
Supplement: Supplementary file 1 [file 1]

## Sheet: Table S1
Supplementary Table 1. Reads and mapping statistic.
						Methylated Cytosines in non-CpG context
Approach	Samples profiled in this study	Cleaned read pairs	Uniquely mapping efficiency	Total cytosine number	Methylated Cytosines in CpG context	CHH	CHG	CHN or CN	Public data accession
WGBS	Human rep1	671357997	73.8	14189773019	79.7	0.2	0.2	2.7	GSM1375216-23
	Human rep2	640935787	74.7	13744658028	76.7	0.2	0.2	3.4	GSM1375224-32
	Mouse rep1	139731218	64.6	3077913438	70.9	0.5	0.4	1.8	GSM1202750
	Mouse rep2	147507409	65.3	3321120083	70.9	0.5	0.4	1.9	GSM1202751
	Mouse rep3	149411879	65.2	3349568830	71.1	0.5	0.4	2	GSM1202752
	Mouse rep4	147383871	64.9	3291200900	71.4	0.5	0.4	2.3	GSM1202753
	Rat rep1	277550604	65.5	5729721767	76.1	0.3	0.3	2.9	GSM2098423
	Rat rep2	214924347	65.9	4851984064	78.5	0.4	0.4	2.9	GSM2098424
RRBS	Human rep1	12016804	67.9	161004056	44.1	0.3	0.4	1.8	GSM2944053
	Human rep2	14691176	70.7	215565739	45.4	0.3	0.4	1.3	GSM2944056
	Human rep3	9990582	68.5	123164031	52.6	0.3	0.4	1.3	GSM2944059
	Human rep4	23281485	67.8	125874760	46.5	0.3	0.4	1.3	GSM2944071
	Mouse rep1	19174925	70.4	274762777	32.7	0.3	0.3	0.9	GSM5287116
	Mouse rep2	16244392	69.9	230739590	31.8	0.3	0.3	0.9	GSM5287117
	Mouse rep3	16464782	71.3	236438074	31.1	0.3	0.3	0.9	GSM5287118
	Mouse rep4	17214503	71.1	244009333	31.5	0.3	0.3	0.9	GSM5287119
	Rat rep1	23494644	71.5	262027917	49.7	0.3	0.5	1.2	GSM5282644
	Rat rep2	26485107	72.1	301969113	49.4	0.3	0.5	1.3	GSM5282646
	Rat rep3	21315653	71.4	233831611	48.5	0.3	0.5	1.4	GSM5282647
	Rat rep4	23652640	72.4	268527482	51	0.3	0.5	1.3	GSM5282648
	Mini-pig rep1	50509501	55.76	587238142	54.1	0.4	0.8	4.9	This study
	Mini-pig rep2	61041547	54.7	471135811	54	0.4	0.8	4.9	This study
	Mini-pig rep3	49584311	54.9	582453605	54.6	0.4	0.8	4.8	This study
	Mini-pig rep4	53865268	54.8	514083850	54.9	0.4	0.8	4.9	This study

## Sheet: Table S2
Supplementary Table 2. CpG sites in methylome mapping.
			Original assembly			Mapped to human reference genome (hg38)
Approach	Species	Assembly	Total CpG	Total CpG after SNPs filtering	Number of CpG sites with at least 2X coverage	Total mapped CpGs	Fully conserved CpG	Mean coverage at orthologous CpG sites
WGBS	Human rep1	hg38	44435943	43770803	31528522	-	-	-
	Human rep2	hg38	43707841	43054167	30510411	-	-	-
	Mouse rep1	mm10	28896455	28324427	16678086	12585149	1958528	3.85
	Mouse rep2	mm10	29330659	28749031	17308563	12756288	1985599	4
	Mouse rep3	mm10	29405103	28821418	17410776	12781992	1990323	4.02
	Mouse rep4	mm10	29314672	28728786	17256372	12735691	1981596	3.98
	Rat rep1	rn6	40472521	39989373	27756373	17699433	2516124	3.72
	Rat rep2	rn6	39824444	39348003	25571462	17264516	2391016	3.32
RRBS	Human rep1	hg38	2563641	2544666	1633346	-	-	-
	Human rep2	hg38	2298764	2282068	1408970	-	-	-
	Human rep3	hg38	2150593	2135293	1194084	-	-	-
	Human rep4	hg38	2639866	2619922	1669700	-	-	-
	Mouse rep1	mm10	3283058	3252332	2627776	2201679	993683	15.91
	Mouse rep2	mm10	3152812	3124204	2537690	2137896	979227	13.96
	Mouse rep3	mm10	3139762	3111345	2546762	2133091	979755	14.73
	Mouse rep4	mm10	3136970	3108582	2535226	2131351	977602	15.24
	Rat rep1	rn6	2585990	2570183	2109879	1681979	670830	12.33
	Rat rep2	rn6	2601485	2585807	2176437	1708335	689979	14.53
	Rat rep3	rn6	2568333	2552535	2067439	1667431	667568	11.55
	Rat rep4	rn6	2534489	2519170	2092783	1660539	666492	12.57
	Mini-pig rep1	susScr11	7149828	6206310	5093254	4118411	1479390	13.7
	Mini-pig rep2	susScr11	7302163	6425576	5001109	4203952	1488904	14.98
	Mini-pig rep3	susScr11	7174088	6331760	5342188	4148676	1473870	16.33
	Mini-pig rep4	susScr11	7000737	6189591	5223134	4082132	1461085	19.13

## Sheet: Table S3
Supplementary Table 3. The details of the DMPs, DMEs and DMIs for human and mouse comparison using WGBS dataset.
ID	Chromosome	Start	End	Feature	Methylation (Mouse)	Methylation (Human)	Read (Mouse)	Read (Human)	Pvalue	Qvalue	Methylation Difference (Human - Mouse)
NM_152486	chr1	939275	939460	exons_1	1	0.777778	33	18	0.00274064	0.0187566	-0.222222
NM_001385640	chr1	939413	941143	introns_1	1	0.777778	33	18	0.00274064	0.0187566	-0.222222
NM_152486	chr1	943908	944574	exons_7	0.966292	0.482759	89	29	4.51443e-09	6.44089e-08	-0.483534
NM_015658	chr1	953289	953781	introns_11	1	0.466667	60	30	6.10717e-11	1.03797e-09	-0.533333
NM_001305275	chr1	1022463	1035276	introns_2	0.795259	0.19708	464	274	1.52164e-59	4.43241e-57	-0.598178
NM_001364727	chr1	1032992	1034992	promoters	0.757106	0	387	218	6.01692e-91	6.47143e-88	-0.757106
NM_001364727	chr1	1033993	1034703	exons_1	0.755853	0	299	154	2.97593e-66	1.1348e-63	-0.755853
NM_001364727	chr1	1035325	1040664	introns_2	0.981132	0	53	22	1.03577e-19	4.00798e-18	-0.981132
NM_001130045	chr1	1197438	1197935	exons_3	0.00414938	0.990741	241	108	1.27856e-90	1.34077e-87	0.986591
NM_030649	chr1	1292391	1293708	exons_1	1	0.0217391	52	46	3.82327e-29	2.98642e-27	-0.978261
NR_106784	chr1	1295170	1297170	promoters	1	0.787879	51	33	0.000174945	0.00152372	-0.212121
NM_030649	chr1	1295447	1295554	exons_6	1	0.787879	51	33	0.000174945	0.00152372	-0.212121
NM_001330311	chr1	1337977	1338183	exons_2	0.965517	0.666667	29	27	0.00207587	0.0147284	-0.298851
NM_001127229	chr1	1373736	1373902	exons_1	1	0.0731707	50	41	5.00823e-24	2.86596e-22	-0.926829
NM_001350497	chr1	1397342	1399342	promoters	0.533333	0	90	66	1.46737e-16	4.2361e-15	-0.533333
NM_001350499	chr1	1398233	1398342	exons_1	0.533333	0	90	66	1.46737e-16	4.2361e-15	-0.533333
NM_018188	chr1	1517167	1517412	exons_1	0.0724638	0.941176	69	17	5.20578e-13	1.09345e-11	0.868713
NM_001170536	chr1	1517311	1517412	exons_1	0.0724638	0.941176	69	17	5.20578e-13	1.09345e-11	0.868713
NM_001170536	chr1	1520141	1520306	exons_4	0.044164	0.98	317	200	2.01619e-120	3.38284e-117	0.935836
NM_001282539	chr1	1825500	1890819	introns_1	0.969231	0.05	65	40	8.12791e-25	4.96988e-23	-0.919231
NM_002074	chr1	1839239	1890819	introns_2	0.969231	0.05	65	40	8.12791e-25	4.96988e-23	-0.919231
NM_001304360	chr1	1955851	1956619	introns_22	0.0697674	0.674419	43	43	9.1285e-10	1.38033e-08	0.604651
NM_001350804	chr1	2135348	2144209	introns_1	1	0.75	39	24	0.000378808	0.00311625	-0.25
NM_003036	chr1	2229736	2302977	introns_1	0.767081	0.979452	322	146	5.68136e-11	9.69924e-10	0.212371
NM_003036	chr1	2306020	2306250	exons_6	0.971429	0.0262009	280	229	1.20162e-126	2.19145e-123	-0.945228
NM_033467	chr1	2611341	2612126	introns_21	0.285714	0.916667	49	12	3.63131e-05	0.000346803	0.630952
NM_022114	chr1	3244138	3385151	introns_2	0.957792	0.5613	924	677	1.36141e-87	1.32804e-84	-0.396492
NM_022114	chr1	3385287	3396490	introns_3	0.894737	0	38	14	1.17283e-10	1.93607e-09	-0.894737
NM_005427	chr1	3707549	3707791	exons_1	0.245161	0.982063	155	223	9.2919e-59	2.66957e-56	0.736901
NM_001042478	chr1	4655455	4711899	introns_1	0.72956	0.978873	318	142	6.73896e-13	1.40423e-11	0.249313
NM_015557	chr1	6128046	6128218	exons_18	0.96	0.0588235	25	17	1.78619e-10	2.88451e-09	-0.901176
NR_125997	chr1	6204780	6206780	promoters	0.322581	0	31	24	0.000284503	0.00239393	-0.322581
NM_207396	chr1	6205118	6207118	promoters	0.322581	0	31	24	0.000284503	0.00239393	-0.322581
NM_001024598	chr1	6243178	6245178	promoters	0.740506	0.151899	158	158	1.1166e-27	8.06142e-26	-0.588608
NM_001024598	chr1	6244351	6244446	exons_2	0.987952	0.239583	83	96	2.76582e-29	2.20142e-27	-0.748368
NM_001024598	chr1	6244447	6244547	introns_2	0.894737	0.0434783	38	23	2.05506e-12	4.09898e-11	-0.851259
NM_019089	chr1	6415234	6419153	exons_1	0.777174	0.574713	184	87	0.000720448	0.00561917	-0.202461
NM_001349612	chr1	6785576	6825091	introns_1	0.470588	0	34	20	1.59991e-05	0.000159406	-0.470588
NM_001349627	chr1	6785576	6806982	introns_1	0.470588	0	34	20	1.59991e-05	0.000159406	-0.470588
NM_015215	chr1	6785576	6820180	introns_1	0.470588	0	34	20	1.59991e-05	0.000159406	-0.470588
NM_015215	chr1	7249627	7467829	introns_2	0.676522	0.951368	575	329	1.94429e-25	1.23569e-23	0.274846
NM_001289861	chr1	7785441	7785586	exons_2	0.530612	0	49	53	4.13937e-12	8.00507e-11	-0.530612
NM_018948	chr1	8015693	8026157	introns_3	0.6	0	35	44	2.70351e-11	4.82354e-10	-0.6
NM_207420	chr1	9014681	9014868	exons_6	0.148148	0.945946	27	37	5.72262e-12	1.0906e-10	0.797798
NM_001009566	chr1	9773395	9823642	introns_2	0.117647	1	34	27	9.89309e-15	2.40705e-13	0.882353
NM_001330349	chr1	11272197	11274197	promoters	0.441558	0	77	91	1.56506e-15	4.10557e-14	-0.441558
NM_001330349	chr1	11273198	11274060	exons_1	0.441558	0	77	91	1.56506e-15	4.10557e-14	-0.441558
NM_000302	chr1	11954830	11954893	exons_5	0.180328	0.894737	61	38	2.89305e-13	6.21042e-12	0.714409
NM_001135610	chr1	13749488	13816426	introns_1	0.651042	0.178344	192	157	8.59563e-20	3.33228e-18	-0.472698
NM_012231	chr1	13782832	13816426	introns_1	0.925926	0.383562	135	73	2.38499e-17	7.46572e-16	-0.542364
NR_149058	chr1	14391579	14419493	introns_4	0.96	0.102564	50	39	9.06764e-19	3.18819e-17	-0.857436
NR_149058	chr1	14418973	14420973	promoters	0.96	0.102564	50	39	9.06764e-19	3.18819e-17	-0.857436
NM_015209	chr1	15034749	15034885	exons_1	0.969925	0.763158	133	76	3.46955e-06	3.724e-05	-0.206767
NM_001136218	chr1	15214895	15215431	exons_2	0.946429	0.1	56	20	3.0206e-13	6.47099e-12	-0.846429
NR_135082	chr1	15214895	15215243	exons_1	0.946429	0.1	56	20	3.0206e-13	6.47099e-12	-0.846429
NM_033440	chr1	15466145	15467385	introns_6	0.193548	0.787234	31	47	1.09832e-07	1.381e-06	0.593686
NM_001350151	chr1	15758330	15764492	introns_2	0.0714286	0.833333	28	42	2.47321e-11	4.43149e-10	0.761905
NM_017556	chr1	15758849	15764495	introns_1	0.0714286	0.833333	28	42	2.47321e-11	4.43149e-10	0.761905
NM_030907	chr1	16232510	16232646	exons_2	0.761538	0.964912	130	114	1.48078e-06	1.64016e-05	0.203374
NM_001136204	chr1	17416647	17420713	introns_6	1	0.692308	36	26	7.88049e-05	0.000722367	-0.307692
NM_032880	chr1	18376310	18376395	exons_7	0.14	0.971429	50	35	1.51449e-16	4.3661e-15	0.831429
NM_152375	chr1	18479929	18481929	promoters	0.985915	0.358209	71	67	5.09498e-18	1.69078e-16	-0.627707
NM_152375	chr1	18480930	18485986	exons_1	1	0.0526316	30	38	8.5787e-19	3.02898e-17	-0.947368
NM_001135254	chr1	18636372	18691753	introns_1	0.925	0.416667	160	48	3.00033e-13	6.43415e-12	-0.508333
NM_001377531	chr1	20345594	20348244	introns_14	0.666667	1	33	15	0.00187941	0.0135081	0.333333
NM_001330383	chr1	21602914	21603657	introns_5	0.324324	0.95	37	20	9.57057e-07	1.08353e-05	0.625676
NM_001350525	chr1	21602914	21603834	introns_1	0.324324	0.95	37	20	9.57057e-07	1.08353e-05	0.625676
NM_002885	chr1	21602914	21606065	introns_1	0.324324	0.95	37	20	9.57057e-07	1.08353e-05	0.625676
NM_001330383	chr1	21608213	21608350	exons_2	0.980952	0.038961	105	77	6.98341e-46	1.26261e-43	-0.941991
NM_001330383	chr1	21649797	21665210	introns_1	0.725806	0	62	39	4.55627e-16	1.25487e-14	-0.725806
NM_002885	chr1	21649797	21669253	introns_1	0.725806	0	62	39	4.55627e-16	1.25487e-14	-0.725806
NM_001039802	chr1	22052743	22074093	introns_1	0	0.947368	38	19	1.81021e-15	4.69871e-14	0.947368
NM_001791	chr1	22052743	22078428	introns_1	0	0.947368	38	19	1.81021e-15	4.69871e-14	0.947368
NM_030761	chr1	22117313	22120517	exons_1	0.714286	0.955556	35	45	0.00218082	0.0153356	0.24127
NM_001347466	chr1	22638833	22639682	exons_1	0.0131579	0.318182	76	44	6.58351e-07	7.62009e-06	0.305024
NM_015991	chr1	22638833	22639678	exons_1	0.0131579	0.318182	76	44	6.58351e-07	7.62009e-06	0.305024
NM_001077195	chr1	23359448	23363221	exons_1	0.290323	0.967742	31	31	2.43852e-09	3.56026e-08	0.677419
NM_152372	chr1	24067021	24067088	exons_10	0.181818	0.904762	33	21	4.18567e-08	5.4189e-07	0.722944
NM_152372	chr1	24068030	24068222	introns_11	0.285714	0.974359	42	39	3.78012e-12	7.34758e-11	0.688645
NM_152372	chr1	24068223	24068367	exons_12	0.0588235	1	34	36	1.92669e-19	7.26117e-18	0.941176
NM_001330430	chr1	25408870	25420638	introns_4	0.0833333	0.972973	36	37	3.55419e-17	1.089e-15	0.88964
NM_001289010	chr1	25618338	25686439	introns_1	0.650602	0.309091	83	55	7.1994e-05	0.00066254	-0.341512
NM_000437	chr1	25976774	25982363	introns_4	0.645161	1	31	22	0.000202388	0.00174248	0.354839
NM_004455	chr1	26020774	26022774	promoters	0	0.962963	28	27	2.07684e-16	5.94862e-15	0.962963
NM_004455	chr1	26021775	26023425	exons_1	0	0.970149	64	67	1.83963e-37	2.22378e-35	0.970149
NM_004455	chr1	26035165	26036463	exons_11	0.957447	0	47	25	7.14427e-19	2.54911e-17	-0.957447
NM_001297648	chr1	26176490	26178490	promoters	0	0.954545	40	22	3.15368e-17	9.71963e-16	0.954545
NM_001297648	chr1	26177600	26180452	introns_1	0	0.954545	40	22	3.15368e-17	9.71963e-16	0.954545
NR_110698	chr1	26224319	26226319	promoters	1	0	33	18	4.02618e-16	1.12588e-14	-1
NR_110698	chr1	26225320	26225703	exons_1	1	0	33	18	4.02618e-16	1.12588e-14	-1
NM_001039775	chr1	26346713	26354035	introns_19	0.206349	0.909091	63	44	3.60672e-14	8.43768e-13	0.702742
NM_001039775	chr1	26353130	26355130	promoters	0.206349	0.909091	63	44	3.60672e-14	8.43768e-13	0.702742
NM_006142	chr1	26862148	26864148	promoters	0	0.306122	31	49	4.04951e-05	0.000384648	0.306122
NM_006142	chr1	26863149	26864456	exons_1	0	0.306122	31	49	4.04951e-05	0.000384648	0.306122
NM_052943	chr1	27006958	27012406	introns_1	0.0449438	0.936508	89	63	3.89776e-33	3.92075e-31	0.891564
NM_001193308	chr1	27350953	27351257	introns_6	0.982759	0.0425532	58	47	2.46517e-27	1.74669e-25	-0.940205
NM_001297609	chr1	27359858	27359994	exons_13	1	0.482759	37	29	3.20601e-08	4.19723e-07	-0.517241
NM_001297609	chr1	27360241	27360368	exons_14	0.976744	0	43	41	4.56598e-25	2.85007e-23	-0.976744
NR_003109	chr1	28552016	28554016	promoters	0.389831	0	59	52	4.56075e-09	6.49593e-08	-0.389831
NM_017846	chr1	28552084	28554084	promoters	0.389831	0	59	52	4.56075e-09	6.49593e-08	-0.389831
NR_003109	chr1	28553640	28553737	exons_1	0.389831	0	59	52	4.56075e-09	6.49593e-08	-0.389831
NM_000911	chr1	28812611	28858953	introns_1	0.205882	0.93617	34	47	1.6223e-12	3.26374e-11	0.730288
NM_002379	chr1	30716916	30718734	introns_5	0.216495	0	97	89	4.80652e-08	6.19208e-07	-0.216495
NR_034182	chr1	30718772	30719565	exons_1	0.21875	0.0185185	96	54	0.000160577	0.00140617	-0.200231
NM_024522	chr1	31188188	31239493	introns_6	0.983333	0.580357	120	112	3.47694e-16	9.78159e-15	-0.402976
NM_178865	chr1	31412212	31414212	promoters	0.309524	0	42	20	0.000623262	0.0049031	-0.309524
NM_001199039	chr1	31412812	31414812	promoters	0.309524	0	42	20	0.000623262	0.0049031	-0.309524
NM_001042771	chr1	32273110	32275110	promoters	0.934783	0.011236	92	89	2.19119e-44	3.79801e-42	-0.923547
NM_001330468	chr1	32274325	32274434	exons_1	0.941176	0.0263158	51	38	1.94501e-21	8.7632e-20	-0.914861
NM_001330468	chr1	32274737	32274818	exons_2	0.926829	0	41	51	2.91331e-24	1.69254e-22	-0.926829
NR_052852	chr1	32333839	32335097	exons_1	0.689189	0	148	97	2.46196e-34	2.57649e-32	-0.689189
NM_001145720	chr1	32470584	32471615	exons_2	0.769231	0	52	24	2.60369e-12	5.16381e-11	-0.769231
NR_111980	chr1	32553541	32595053	introns_1	0.494737	0.97619	95	84	4.51806e-15	1.13346e-13	0.481454
NM_001040441	chr1	32592931	32593754	exons_1	0.494737	0.97619	95	84	4.51806e-15	1.13346e-13	0.481454
NM_020888	chr1	32742190	32767786	introns_1	0.954023	0.0253165	87	79	8.32361e-41	1.1998e-38	-0.928707
NM_001369553	chr1	32754181	32767786	introns_1	0.954023	0.0253165	87	79	8.32361e-41	1.1998e-38	-0.928707
NM_001301825	chr1	33098007	33098179	exons_1	0.408602	1	93	76	8.66317e-21	3.69294e-19	0.591398
NM_001350402	chr1	33098067	33098179	exons_1	0.408602	1	93	76	8.66317e-21	3.69294e-19	0.591398
NM_001370212	chr1	33280124	33280457	exons_3	1	0.705882	28	17	0.00101622	0.0077151	-0.294118
NM_001385123	chr1	33355171	33372288	introns_1	0.72093	1	43	18	0.00197544	0.0141185	0.27907
NM_001330488	chr1	33367429	33370420	introns_1	0.72093	1	43	18	0.00197544	0.0141185	0.27907
NM_001385109	chr1	33368623	33370420	introns_1	0.72093	1	43	18	0.00197544	0.0141185	0.27907
NM_001385112	chr1	33368689	33370420	introns_1	0.72093	1	43	18	0.00197544	0.0141185	0.27907
NM_001281956	chr1	33633536	33635213	introns_10	1	0.0612245	40	49	1.06629e-23	5.95562e-22	-0.938776
NM_001080418	chr1	34900068	34900273	exons_9	0.203125	0.98	64	100	2.10861e-28	1.58793e-26	0.776875
NM_005066	chr1	35190498	35190593	exons_2	0.983607	0.375	61	24	2.22215e-10	3.54816e-09	-0.608607
NM_005066	chr1	35190694	35190995	exons_3	0.31068	0.028777	206	139	9.59816e-13	1.97065e-11	-0.281903
NM_001350139	chr1	35269086	35325359	introns_1	0.607843	1	51	37	3.38035e-07	4.03966e-06	0.392157
NM_001375653	chr1	35269095	35325359	introns_1	0.607843	1	51	37	3.38035e-07	4.03966e-06	0.392157
NM_001350138	chr1	35295989	35325359	introns_1	0.607843	1	51	37	3.38035e-07	4.03966e-06	0.392157
NM_001014839	chr1	35559107	35559247	exons_2	0.857143	0.519231	28	52	0.00174701	0.0126563	-0.337912
NM_001330490	chr1	35720981	35736913	introns_1	0.148148	1	27	31	1.06016e-13	2.38827e-12	0.851852
NM_001190481	chr1	35748405	35748604	exons_13	0.980392	0.764706	51	17	0.00678295	0.0416327	-0.215686
NM_018067	chr1	36176697	36176842	exons_1	0	0.42	93	50	7.95472e-13	1.64531e-11	0.42
NM_018067	chr1	36176843	36177872	introns_2	0.239362	0.452055	188	73	0.000959086	0.00732384	0.212693
NM_001286366	chr1	36179316	36179514	introns_1	0.977778	0.0697674	45	43	2.11768e-21	9.49019e-20	-0.90801
NM_018067	chr1	36179316	36179511	introns_1	0.977778	0.0697674	45	43	2.11768e-21	9.49019e-20	-0.90801
NM_024700	chr1	37552645	37552747	exons_3	0.970588	0.583333	68	12	0.000290951	0.00244623	-0.387255
NM_001323623	chr1	37590706	37590845	exons_2	0.974359	0.444444	39	27	2.36138e-07	2.86108e-06	-0.529915
NM_001350756	chr1	37689529	37691529	promoters	0.90566	0	53	38	5.91362e-22	2.78086e-20	-0.90566
NM_001350756	chr1	37689884	37690215	introns_1	0.90566	0	53	38	5.91362e-22	2.78086e-20	-0.90566
NM_001350760	chr1	37689884	37690001	introns_1	0.90566	0	53	38	5.91362e-22	2.78086e-20	-0.90566
NM_017850	chr1	37689884	37690333	introns_1	0.90566	0	53	38	5.91362e-22	2.78086e-20	-0.90566
NM_001350757	chr1	37689887	37690215	introns_1	0.90566	0	53	38	5.91362e-22	2.78086e-20	-0.90566
NM_001350766	chr1	37689887	37690333	introns_1	0.90566	0	53	38	5.91362e-22	2.78086e-20	-0.90566
NM_001350769	chr1	37689887	37690001	introns_1	0.90566	0	53	38	5.91362e-22	2.78086e-20	-0.90566
NM_004468	chr1	38004514	38006514	promoters	0	0.296296	56	27	8.5185e-06	8.76637e-05	0.296296
NM_012090	chr1	39084439	39231181	introns_1	0.933333	0	30	25	4.3556e-15	1.09467e-13	-0.933333
NM_014571	chr1	39631580	39632648	introns_3	0.947368	0.6875	57	16	0.00777313	0.0467123	-0.259868
NM_001720	chr1	39775039	39788151	introns_2	0.242424	0	33	23	0.00219559	0.0154213	-0.242424
NR_133055	chr1	42783895	42785895	promoters	0.44186	0	43	36	1.13154e-07	1.41724e-06	-0.44186
NM_001354602	chr1	42784031	42786031	promoters	0.44186	0	43	36	1.13154e-07	1.41724e-06	-0.44186
NR_133055	chr1	42784683	42784895	exons_3	0.44186	0	43	36	1.13154e-07	1.41724e-06	-0.44186
NR_106791	chr1	43170712	43172712	promoters	0.97619	0.666667	42	21	0.000601178	0.00473915	-0.309524
NM_006824	chr1	43170756	43170879	exons_6	0.97619	0.666667	42	21	0.000601178	0.00473915	-0.309524
NM_001005417	chr1	43990298	43991171	exons_7	0.942029	0.539683	69	63	2.61889e-08	3.45337e-07	-0.402346
NM_001349127	chr1	43990595	43992595	promoters	0.906977	0.45	43	40	3.47878e-06	3.72913e-05	-0.456977
NM_152499	chr1	43990598	43992598	promoters	0.906977	0.45	43	40	3.47878e-06	3.72913e-05	-0.456977
NM_001328630	chr1	43997740	44000766	introns_1	0.666667	0.977011	72	87	2.64095e-08	3.48137e-07	0.310345
NM_001328626	chr1	43997855	43998025	exons_1	0.703704	0.956522	27	46	0.00262519	0.0180252	0.252818
NM_001328626	chr1	43998026	44000766	introns_1	0.644444	1	45	41	9.32862e-07	1.06068e-05	0.355556
NM_001301701	chr1	44248039	44284834	introns_1	0.56	1	75	48	2.32481e-10	3.69381e-09	0.44
NM_001319956	chr1	44405527	44411980	introns_1	0.878049	0.526316	123	57	4.4195e-07	5.20147e-06	-0.351733
NM_001376486	chr1	44405531	44411980	introns_1	0.878049	0.526316	123	57	4.4195e-07	5.20147e-06	-0.351733
NM_001376488	chr1	44407082	44411980	introns_1	0.878049	0.526316	123	57	4.4195e-07	5.20147e-06	-0.351733
NM_001319956	chr1	44411981	44412722	exons_1	0.228571	1	35	16	9.72065e-09	1.33994e-07	0.771429
NM_001300746	chr1	44653247	44655209	exons_1	0.25641	0.954023	78	87	6.30744e-23	3.20305e-21	0.697613
NM_001300747	chr1	44653247	44655119	exons_1	0.25641	0.954023	78	87	6.30744e-23	3.20305e-21	0.697613
NM_001300748	chr1	44653247	44655116	exons_1	0.25641	0.954023	78	87	6.30744e-23	3.20305e-21	0.697613
NM_153274	chr1	44785599	44785676	exons_5	1	0.230769	44	52	6.97417e-18	2.28724e-16	-0.769231
NM_153274	chr1	44787170	44789170	promoters	0.345679	0.873239	81	71	6.75566e-12	1.27934e-10	0.52756
NM_153274	chr1	44787372	44787466	exons_8	0.345679	0.873239	81	71	6.75566e-12	1.27934e-10	0.52756
NM_003738	chr1	44841847	44842039	exons_20	0.193548	0.730769	31	26	3.02021e-05	0.000290964	0.537221
NM_001166292	chr1	44841944	44843944	promoters	0.193548	0.730769	31	26	3.02021e-05	0.000290964	0.537221
NM_024602	chr1	45004248	45004377	exons_5	0.4	0.97561	30	41	1.07578e-08	1.47756e-07	0.57561
NM_024602	chr1	45004600	45004806	exons_6	0.36	1	100	81	1.58264e-24	9.45661e-23	0.64
NM_001330540	chr1	45508796	45513382	exons_2	0.714286	0.969697	63	99	1.90177e-06	2.09045e-05	0.255411
NM_001377417	chr1	47250139	47251922	exons_1	1	0.75	35	24	0.000590631	0.0046771	-0.25
NR_126355	chr1	47386357	47408319	introns_2	0.9375	0.6875	48	32	0.00299053	0.0202226	-0.25
NM_001194986	chr1	47794761	47801472	introns_4	0.971014	0.745763	69	59	9.31716e-05	0.000843916	-0.225252
NM_001011547	chr1	48239322	48239537	exons_9	0.673469	1	49	37	5.28945e-06	5.55651e-05	0.326531
NM_001286239	chr1	48295372	48298893	exons_1	1	0.75	57	28	4.00161e-05	0.000380357	-0.25
NM_019073	chr1	48295373	48298893	exons_1	1	0.75	57	28	4.00161e-05	0.000380357	-0.25
NM_001144777	chr1	50048183	50144956	introns_1	0.0487805	0.509804	41	51	2.76867e-07	3.32859e-06	0.461023
NM_001144776	chr1	50104001	50144956	introns_1	0.0487805	0.509804	41	51	2.76867e-07	3.32859e-06	0.461023
NM_001144775	chr1	50105230	50107230	promoters	0.0487805	0.509804	41	51	2.76867e-07	3.32859e-06	0.461023
NM_001144775	chr1	50106394	50144956	introns_1	0.0487805	0.509804	41	51	2.76867e-07	3.32859e-06	0.461023
NM_007051	chr1	50744776	50787999	introns_15	0.25641	1	39	34	2.34482e-13	5.0699e-12	0.74359
NM_001199080	chr1	53084513	53085493	exons_12	0.954545	0	44	53	3.78585e-27	2.6511e-25	-0.954545
NM_001199081	chr1	53084513	53085494	exons_1	0.954545	0	44	53	3.78585e-27	2.6511e-25	-0.954545
NM_033067	chr1	53461473	53461645	exons_2	0.875	0	24	44	4.54538e-16	1.25352e-14	-0.875
NM_001324316	chr1	53894548	53909930	introns_1	0.393939	1	33	39	1.66085e-10	2.68773e-09	0.606061
NM_001039716	chr1	53904810	53909930	introns_1	0.393939	1	33	39	1.66085e-10	2.68773e-09	0.606061
NM_213593	chr1	53906295	53909930	introns_2	0.393939	1	33	39	1.66085e-10	2.68773e-09	0.606061
NM_152607	chr1	54807889	54808011	exons_4	0.514286	0.958333	35	48	8.76295e-07	9.99105e-06	0.444048
NM_001353983	chr1	57291167	57424618	introns_1	1	0.759036	137	83	7.52851e-11	1.26824e-09	-0.240964
NM_001365793	chr1	57291167	57423016	introns_1	1	0.759036	137	83	7.52851e-11	1.26824e-09	-0.240964
NM_001365794	chr1	57291167	57424193	introns_1	1	0.759036	137	83	7.52851e-11	1.26824e-09	-0.240964
NM_001365795	chr1	57291167	57423929	introns_1	1	0.759036	137	83	7.52851e-11	1.26824e-09	-0.240964
NM_181712	chr1	62281635	62319105	introns_3	1	0.76087	41	46	8.53513e-05	0.000776773	-0.23913
NM_002633	chr1	63648517	63648652	exons_7	0.644444	0.952381	45	21	0.00319521	0.0214031	0.307937
NM_020925	chr1	64550657	64582155	introns_1	0.630435	1	46	24	3.72513e-05	0.000355502	0.369565
NM_001003680	chr1	65425379	65565545	introns_1	0.981132	0.0263158	53	38	1.57295e-24	9.41212e-23	-0.954816
NM_001376539	chr1	66741437	66743072	introns_6	0.915254	0.366667	59	30	4.13279e-08	5.35374e-07	-0.548588
NM_001077703	chr1	66926142	66926242	exons_2	0.489051	0	137	61	1.55035e-15	4.07208e-14	-0.489051
NM_001330635	chr1	70036444	70036624	exons_1	0.772727	0.222222	44	45	9.22134e-08	1.16752e-06	-0.550505
NM_001366839	chr1	70036504	70036624	exons_1	0.772727	0.222222	44	45	9.22134e-08	1.16752e-06	-0.550505
NM_203350	chr1	71078457	71078565	exons_6	1	0.757576	40	33	0.000191671	0.00165701	-0.242424
NM_001002912	chr1	74649222	74649315	exons_6	0.421875	0.962963	64	27	1.23795e-07	1.54407e-06	0.541088
NM_001160011	chr1	76074885	76313804	introns_1	0.891667	0.361905	120	105	1.23379e-17	3.94755e-16	-0.529762
NM_001349111	chr1	76074885	76309505	introns_1	0.891667	0.361905	120	105	1.23379e-17	3.94755e-16	-0.529762
NM_001349105	chr1	76074885	76412007	introns_1	0.916129	0.5	155	136	3.80643e-16	1.06656e-14	-0.416129
NM_001320273	chr1	76868743	77050257	introns_1	0.507937	0.952381	63	42	1.72394e-07	2.11378e-06	0.444444
NM_001320274	chr1	76868743	77062974	introns_1	0.507937	0.952381	63	42	1.72394e-07	2.11378e-06	0.444444
NM_030965	chr1	76868743	77044203	introns_1	0.507937	0.952381	63	42	1.72394e-07	2.11378e-06	0.444444
NM_001366008	chr1	81306510	81445020	introns_1	0.0521739	0.878788	115	66	3.78928e-32	3.66233e-30	0.826614
NM_001366004	chr1	81306510	81414170	introns_1	0.0298507	0.853659	67	41	1.25751e-20	5.29062e-19	0.823808
NM_001366003	chr1	81326776	81445020	introns_1	0.0521739	0.878788	115	66	3.78928e-32	3.66233e-30	0.826614
NM_001366004	chr1	81414352	81445020	introns_1	0.0833333	0.92	48	25	1.38832e-13	3.08446e-12	0.836667
NM_021233	chr1	84411000	84412348	introns_2	0	0.870968	39	31	7.60561e-17	2.25779e-15	0.870968
NM_025065	chr1	84480956	84481012	exons_2	1	0.42	47	50	1.31378e-12	2.66736e-11	-0.58
NM_004388	chr1	84555200	84563256	introns_1	1	0.219512	31	41	8.16022e-14	1.85221e-12	-0.780488
NM_012152	chr1	84865385	84866138	exons_2	0.987179	0.75	78	28	0.000137719	0.00122027	-0.237179
NM_001134445	chr1	85577200	85579200	promoters	0.261905	0	42	20	0.00188179	0.0135223	-0.261905
NM_152890	chr1	85842394	85847664	introns_3	0.208333	0.942857	48	35	1.1949e-12	2.43307e-11	0.734524
NR_026989	chr1	87168136	87169203	exons_1	0.212121	0.875	33	24	2.24411e-07	2.72529e-06	0.662879
NM_006769	chr1	87332252	87339535	introns_1	1	0.727273	36	22	0.000346802	0.00288002	-0.272727
NM_052941	chr1	89197110	89197304	exons_10	0.955882	0.134146	68	82	1.23142e-27	8.87513e-26	-0.821736
NM_001134476	chr1	89582625	89584789	exons_4	0.0540541	0.984848	111	66	2.44569e-41	3.67267e-39	0.930794
NM_181781	chr1	90022250	90022345	exons_6	1	0.790698	93	43	2.5243e-06	2.7481e-05	-0.209302
NM_020063	chr1	90712625	90714530	introns_1	0.297297	1	37	46	2.40972e-14	5.71386e-13	0.702703
NR_135038	chr1	90789488	90851482	introns_2	0.781095	0.426752	201	157	4.49028e-12	8.6717e-11	-0.354343
NR_147930	chr1	90832197	90851482	introns_1	0.649123	0.0222222	114	90	4.3605e-24	2.50899e-22	-0.626901
NR_147931	chr1	90832197	90837549	introns_1	0.285714	0.0151515	56	66	4.24716e-06	4.5056e-05	-0.270563
NR_147932	chr1	90832197	90835825	introns_1	0.285714	0.0151515	56	66	4.24716e-06	4.5056e-05	-0.270563
NR_147931	chr1	90837766	90851482	introns_1	1	0.0416667	58	24	3.93626e-21	1.72349e-19	-0.958333
NM_001252273	chr1	92833035	92847182	introns_1	0.905405	0.0666667	74	30	2.34992e-17	7.36143e-16	-0.838739
NM_000969	chr1	92833389	92833458	exons_1	0.905405	0.0666667	74	30	2.34992e-17	7.36143e-16	-0.838739
NM_001261408	chr1	93674942	93706091	introns_2	0.185567	0.471698	97	106	1.17147e-05	0.000118778	0.286131
NR_146486	chr1	95351107	95353107	promoters	0.440678	0.933333	59	30	1.16273e-06	1.30108e-05	0.492655
NM_000110	chr1	97306298	97373560	introns_1	0.940594	0.692308	101	39	0.000207283	0.00178134	-0.248286
NR_046590	chr1	97322707	97322955	exons_2	0.945455	0.576923	55	26	6.7957e-05	0.000627592	-0.368531
NR_031666	chr1	99554017	99712926	introns_4	0.721212	0.941935	165	155	5.12806e-08	6.59214e-07	0.220723
NM_017734	chr1	99688775	99689872	exons_7	0.0769231	0.826087	39	23	6.24937e-10	9.60557e-09	0.749164
NM_001261442	chr1	100872372	100874430	exons_1	0.5	1	52	19	4.15367e-06	4.412e-05	0.5
NM_001033025	chr1	100872391	100874430	exons_1	0.5	1	52	19	4.15367e-06	4.412e-05	0.5
NM_001854	chr1	102978860	102978913	exons_34	0	1	49	15	6.91463e-17	2.05849e-15	1
NM_001079874	chr1	107687499	107689499	promoters	1	0.55	35	20	3.54559e-06	3.79784e-05	-0.45
NM_006113	chr1	107688407	107704549	introns_1	1	0.55	35	20	3.54559e-06	3.79784e-05	-0.45
NR_046653	chr1	107993636	107994181	introns_1	0.973684	0.636364	76	33	2.98748e-06	3.22722e-05	-0.337321
NM_001102592	chr1	108654716	108654850	exons_4	1	0.581818	63	55	1.09422e-10	1.81129e-09	-0.418182
NM_005645	chr1	109075003	109077003	promoters	0	0.518519	32	27	1.77551e-07	2.1751e-06	0.518519
NM_005645	chr1	109075066	109075920	introns_3	0	0.518519	32	27	1.77551e-07	2.1751e-06	0.518519
NM_001267048	chr1	109114337	109161893	introns_1	1	0.741935	73	31	4.5833e-06	4.84016e-05	-0.258065
NM_001408	chr1	109273671	109274021	introns_33	0.212121	0.961538	33	26	4.73352e-10	7.35379e-09	0.749417
NM_031936	chr1	109542422	109544639	exons_2	0	0.930233	40	43	4.74405e-22	2.27422e-20	0.930233
NM_001368809	chr1	109630233	109630406	exons_15	0.970588	0	34	35	1.39679e-20	5.85314e-19	-0.970588
NM_006492	chr1	110064904	110070335	introns_3	0.453333	0.0142857	75	70	9.29222e-12	1.7354e-10	-0.439048
NM_001201545	chr1	110339377	110342268	exons_1	0.862069	0.0492611	290	203	2.33104e-82	1.68583e-79	-0.812808
NM_015967	chr1	113870712	113872712	promoters	0.638889	1	36	38	3.19724e-06	3.4476e-05	0.361111
NM_001193431	chr1	113870759	113872759	promoters	0.638889	1	36	38	3.19724e-06	3.4476e-05	0.361111
NR_157569	chr1	115282033	115284033	promoters	1	0.0408163	61	49	7.22604e-31	6.40811e-29	-0.959184
NR_157569	chr1	115283241	115365669	introns_1	0.76087	0.0289855	92	69	5.34369e-24	3.04547e-22	-0.731884
NM_002506	chr1	115293751	115338203	introns_2	0.290323	0	31	20	0.00141924	0.0104441	-0.290323
NM_002506	chr1	115337249	115339249	promoters	0.290323	0	31	20	0.00141924	0.0104441	-0.290323
NM_001172412	chr1	115683944	115684076	exons_3	0.236515	0.974895	241	239	1.36994e-72	7.561e-70	0.738381
NM_006699	chr1	117368486	117402185	introns_1	0.5	0.0555556	40	18	0.000354562	0.00293922	-0.444444
NM_206996	chr1	118074601	118081100	introns_33	0.45283	0.92	53	25	2.34562e-05	0.000228653	0.46717
NM_015836	chr1	119031216	119033359	exons_1	0.952381	0.238095	42	42	8.36035e-13	1.7258e-11	-0.714286
NM_201263	chr1	119031216	119033388	exons_1	0.952381	0.238095	42	42	8.36035e-13	1.7258e-11	-0.714286
NM_001378229	chr1	119045663	119140554	introns_1	0.593023	0.338462	86	65	0.00180651	0.013028	-0.254562
NM_015836	chr1	119076608	119140554	introns_1	0.593023	0.338462	86	65	0.00180651	0.013028	-0.254562
NM_004326	chr1	147541675	147604776	introns_1	0.104651	0.494737	86	95	4.05113e-09	5.83146e-08	0.390086
NM_005850	chr1	149926376	149926918	exons_4	0.96875	0.538462	32	26	3.87116e-05	0.000368542	-0.430288
NM_001304724	chr1	150157016	150158818	introns_1	0.208333	0.894737	48	38	2.57748e-11	4.60063e-10	0.686404
NM_001304723	chr1	150157487	150158818	introns_1	0.208333	0.894737	48	38	2.57748e-11	4.60063e-10	0.686404
NR_051960	chr1	150514756	150516756	promoters	1	0	33	47	2.15173e-25	1.36339e-23	-1
NM_001288607	chr1	150560060	150560933	exons_4	0.192982	0.804598	57	87	9.33675e-14	2.10952e-12	0.611615
NM_001288608	chr1	150560060	150560936	exons_1	0.192982	0.804598	57	87	9.33675e-14	2.10952e-12	0.611615
NR_104133	chr1	150561223	150563101	introns_1	0.914286	0	35	41	8.28841e-20	3.21615e-18	-0.914286
NM_001172649	chr1	151708998	151709077	exons_3	0.0212766	1	47	39	1.52483e-25	9.73522e-24	0.978723
NM_001172649	chr1	151709743	151709791	exons_1	0.0933333	0.954545	75	44	3.34281e-23	1.77716e-21	0.861212
NM_001134939	chr1	151761968	151763968	promoters	0.986486	0.306667	74	75	1.50015e-21	6.83972e-20	-0.67982
NM_001300733	chr1	151762376	151762500	exons_2	0.986486	0.306667	74	75	1.50015e-21	6.83972e-20	-0.67982
NM_001301371	chr1	151762479	151764479	promoters	0.972973	0.142857	37	35	7.2942e-15	1.79767e-13	-0.830116
NR_152846	chr1	151838738	151841740	introns_1	0.659751	0.00581395	241	172	5.75768e-52	1.27784e-49	-0.653937
NR_024237	chr1	151839106	151841740	introns_1	0.764423	0.00704225	208	142	6.39528e-55	1.6258e-52	-0.757381
NM_001136003	chr1	151839221	151840202	introns_1	0.916168	0.010989	167	91	2.76822e-54	6.87076e-52	-0.905179
NM_001136003	chr1	151839557	151841557	promoters	0.916168	0.010989	167	91	2.76822e-54	6.87076e-52	-0.905179
NM_001024213	chr1	153626048	153628048	promoters	0	0.942857	25	35	2.39853e-16	6.83485e-15	0.942857
NM_001024212	chr1	153626268	153628268	promoters	0	0.942857	25	35	2.39853e-16	6.83485e-15	0.942857
NM_001024210	chr1	153626534	153631010	introns_1	0	0.957746	65	71	1.77673e-37	2.1602e-35	0.957746
NM_001024211	chr1	153626641	153628641	promoters	0	0.957746	65	71	1.77673e-37	2.1602e-35	0.957746
NM_005979	chr1	153627239	153629239	promoters	0	0.957746	65	71	1.77673e-37	2.1602e-35	0.957746
NM_006271	chr1	153627433	153629433	promoters	0	0.957746	65	71	1.77673e-37	2.1602e-35	0.957746
NM_001024211	chr1	153627483	153627641	exons_1	0	0.942857	25	35	2.39853e-16	6.83485e-15	0.942857
NM_005979	chr1	153627483	153627598	exons_1	0	0.942857	25	35	2.39853e-16	6.83485e-15	0.942857
NM_006271	chr1	153628434	153628496	exons_1	0	0.972222	40	36	1.30663e-22	6.47849e-21	0.972222
NM_181715	chr1	153955167	153958344	introns_13	1	0.272727	28	22	1.24026e-09	1.8422e-08	-0.727273
NM_014437	chr1	153966725	153968725	promoters	0	0.3125	34	16	0.000378888	0.00311625	0.3125
NM_130898	chr1	153966901	153968901	promoters	0	0.3125	34	16	0.000378888	0.00311625	0.3125
NM_001271960	chr1	153967184	153969184	promoters	0	0.3125	34	16	0.000378888	0.00311625	0.3125
NM_001255979	chr1	153967249	153969249	promoters	0	0.3125	34	16	0.000378888	0.00311625	0.3125
NM_001255980	chr1	153968522	153968639	exons_1	0	0.3125	34	16	0.000378888	0.00311625	0.3125
NM_130898	chr1	153968522	153968699	exons_1	0	0.3125	34	16	0.000378888	0.00311625	0.3125
NM_000748	chr1	154571189	154572161	exons_5	0.521739	0.0384615	92	78	1.27011e-13	2.82931e-12	-0.483278
NM_001184892	chr1	154982343	154984343	promoters	0.278481	0.0208333	79	48	3.78352e-05	0.00036069	-0.257648
NM_025207	chr1	154983344	154984066	exons_1	0.278481	0.0208333	79	48	3.78352e-05	0.00036069	-0.257648
NM_001184892	chr1	154983842	154984066	exons_1	0.278481	0.0208333	79	48	3.78352e-05	0.00036069	-0.257648
NM_001252406	chr1	155016220	155018523	exons_2	0.25	0	36	44	7.09424e-05	0.000653724	-0.25
NM_001261466	chr1	155052778	155053909	introns_1	0.983051	0.533333	59	45	3.28969e-09	4.75825e-08	-0.449718
NM_207197	chr1	155052778	155053416	introns_1	0.983051	0.533333	59	45	3.28969e-09	4.75825e-08	-0.449718
NM_004952	chr1	155079070	155085090	introns_1	0.322581	0	31	13	0.00423803	0.0275311	-0.322581
NM_001252607	chr1	155206407	155207797	introns_1	0.28125	0.837209	32	43	6.62815e-07	7.65697e-06	0.555959
NM_001252608	chr1	155206897	155208897	promoters	0.28125	0.837209	32	43	6.62815e-07	7.65697e-06	0.555959
NM_001252607	chr1	155206981	155208981	promoters	0.28125	0.837209	32	43	6.62815e-07	7.65697e-06	0.555959
NM_000298	chr1	155293177	155293343	exons_3	0.466667	0.97561	60	41	2.79968e-09	4.07055e-08	0.508943
NM_000298	chr1	155294482	155294752	exons_6	0.966667	0	30	12	4.93268e-11	8.48897e-10	-0.966667
NM_152280	chr1	155867965	155868791	exons_2	0.575758	0.967742	66	62	1.75428e-08	2.34946e-07	0.391984
NM_001282625	chr1	156090583	156114712	introns_3	0.852459	0.434783	61	69	3.99358e-07	4.72005e-06	-0.417676
NM_001193300	chr1	156160905	156161029	exons_3	0.880597	0	67	34	6.12182e-21	2.64728e-19	-0.880597
NM_001323617	chr1	156279035	156286632	introns_1	0.028169	0.958333	71	48	3.6742e-29	2.87534e-27	0.930164
NR_026678	chr1	156285184	156285983	exons_1	0.028169	0.958333	71	48	3.6742e-29	2.87534e-27	0.930164
NR_168070	chr1	156428426	156430426	promoters	0	1	38	12	1.14086e-13	2.5536e-12	1
NR_135264	chr1	156428548	156430548	promoters	0	1	38	12	1.14086e-13	2.5536e-12	1
NR_135264	chr1	156429376	156429548	exons_1	0	1	38	12	1.14086e-13	2.5536e-12	1
NR_168070	chr1	156429376	156429426	exons_1	0	1	38	12	1.14086e-13	2.5536e-12	1
NM_014215	chr1	156846758	156848920	introns_12	0.880952	0	42	50	4.42055e-22	2.12399e-20	-0.880952
NM_144702	chr1	156927496	156927655	exons_7	0.770492	0.00588235	183	170	7.03569e-60	2.15415e-57	-0.764609
NM_003126	chr1	158678401	158678534	exons_47	0.983333	0.653846	60	26	2.08404e-05	0.00020482	-0.329487
NM_001127173	chr1	159200804	159203313	exons_1	0.25	0.934426	104	61	1.20624e-19	4.63343e-18	0.684426
NR_037870	chr1	159200812	159201621	exons_1	0.173333	0.93617	75	47	1.60916e-18	5.52806e-17	0.762837
NR_037870	chr1	159201422	159203422	promoters	0.448276	0.928571	29	14	0.0011209	0.00845029	0.480296
NR_037870	chr1	159202250	159202422	exons_2	0.448276	0.928571	29	14	0.0011209	0.00845029	0.480296
NM_012337	chr1	159888352	159888496	exons_9	0.0714286	1	42	15	2.00212e-12	4.00356e-11	0.928571
NM_145167	chr1	160024953	160031990	exons_1	0.285714	0	35	39	4.30028e-05	0.000407914	-0.285714
NM_000702	chr1	160130422	160130597	exons_13	0.451613	1	31	16	1.43019e-05	0.000143553	0.548387
NM_005598	chr1	160366070	160368070	promoters	0.47541	0.90566	61	53	3.13995e-07	3.76417e-06	0.430251
NM_002348	chr1	160814420	160814761	exons_2	0.0238095	0.958333	42	24	1.11295e-16	3.26233e-15	0.934524
NM_012475	chr1	161160620	161161240	exons_1	0.147059	0.518072	102	83	4.41544e-08	5.70403e-07	0.371013
NM_001350131	chr1	161167487	161168412	introns_1	0.896104	0.659341	77	91	0.000188104	0.00162773	-0.236763
NM_001122764	chr1	161167995	161168127	exons_1	0.896104	0.659341	77	91	0.000188104	0.00162773	-0.236763
NM_004106	chr1	161214294	161216294	promoters	0.709302	0.956044	86	91	3.7597e-06	4.01999e-05	0.246742
NM_001297713	chr1	162020183	162023256	introns_3	0.897436	0.489796	39	49	2.38067e-05	0.000231854	-0.40764
NM_001126060	chr1	162367052	162370023	exons_1	0.982353	0.0232558	170	129	3.8422e-78	2.47946e-75	-0.959097
NM_001164757	chr1	162367052	162370475	exons_1	0.982353	0.0232558	170	129	3.8422e-78	2.47946e-75	-0.959097
NM_053282	chr1	162399088	162402738	introns_2	0.960784	0	51	13	3.65206e-13	7.7761e-12	-0.960784
NM_001184763	chr1	162499955	162500247	exons_1	0.970588	0.75	34	28	0.00741519	0.0449281	-0.220588
NM_001354983	chr1	162631448	162655210	introns_1	0.0333333	0.930233	30	43	7.42301e-17	2.20514e-15	0.896899
NM_001354982	chr1	162632094	162655210	introns_1	0.0333333	0.930233	30	43	7.42301e-17	2.20514e-15	0.896899
NM_006182	chr1	162632632	162655210	introns_1	0.0333333	0.930233	30	43	7.42301e-17	2.20514e-15	0.896899
NM_002585	chr1	164799699	164799889	exons_2	0.972603	0.116279	73	43	1.37421e-23	7.62469e-22	-0.856324
NM_001174069	chr1	165213814	165249407	introns_5	0.959184	0.5	49	18	2.01983e-05	0.000198882	-0.459184
NM_001256570	chr1	165409558	165409690	exons_4	0.0661157	0.939759	121	83	2.84941e-41	4.19373e-39	0.873643
NM_005814	chr1	167052836	167054466	exons_1	0.0909091	0.964286	33	28	7.96899e-14	1.80978e-12	0.873377
NM_005814	chr1	167055850	167063581	introns_3	0.0967742	0.906977	31	43	1.26617e-13	2.82204e-12	0.810203
NM_001937	chr1	168728206	168730206	promoters	0.71875	1	32	39	6.46434e-05	0.00059844	0.28125
NM_001937	chr1	168728870	168729206	exons_4	0.71875	1	32	39	6.46434e-05	0.00059844	0.28125
NM_000130	chr1	169550640	169550739	exons_17	0	1	31	53	7.17063e-26	4.65603e-24	1
NM_000450	chr1	169727349	169727525	exons_5	0.771429	0.975	35	40	0.00453009	0.0291038	0.203571
NM_006902	chr1	170664460	170719725	introns_1	0.973684	0.391304	38	23	1.20541e-07	1.50483e-06	-0.58238
NM_001282750	chr1	172579268	172585017	introns_4	1	0.695652	41	23	6.61014e-05	0.000610994	-0.304348
NM_001282751	chr1	172579268	172588759	introns_1	1	0.695652	41	23	6.61014e-05	0.000610994	-0.304348
NM_022093	chr1	175146931	175148068	exons_19	0.913043	0	69	38	1.85578e-24	1.10572e-22	-0.913043
NM_003285	chr1	175386032	175386301	exons_16	0.30303	0.827586	33	29	1.96653e-05	0.00019377	0.524556
NM_004319	chr1	176876638	176882858	introns_2	1	0.130435	38	23	1.3047e-14	3.16525e-13	-0.869565
NM_004319	chr1	177032456	177032849	exons_3	1	0.236364	66	55	1.09745e-22	5.48022e-21	-0.763636
NM_021165	chr1	177255919	177256109	exons_3	0.84375	0.5	32	44	0.00143256	0.0105255	-0.34375
NM_001199085	chr1	179593460	179593867	exons_2	0.968254	0.217391	63	46	4.58704e-18	1.53069e-16	-0.750863
NM_000721	chr1	181651442	181710953	introns_7	1	0.75	28	32	0.000848745	0.00655644	-0.25
NM_001033044	chr1	182388751	182391678	introns_1	0.509091	0.0178571	55	56	1.33963e-10	2.195e-09	-0.491234
NM_001033056	chr1	182388751	182391174	introns_1	0.509091	0.0178571	55	56	1.33963e-10	2.195e-09	-0.491234
NM_002065	chr1	182388751	182390496	introns_1	0.509091	0.0178571	55	56	1.33963e-10	2.195e-09	-0.491234
NR_036490	chr1	182614139	182616139	promoters	0.981481	0	54	20	8.75674e-19	3.08405e-17	-0.981481
NR_036490	chr1	182615140	182616633	exons_1	0.981481	0	54	20	8.75674e-19	3.08405e-17	-0.981481
NR_148933	chr1	182837935	182839311	introns_1	0.333333	0	45	36	6.488e-06	6.76474e-05	-0.333333
NR_033302	chr1	182838346	182840346	promoters	0.333333	0	45	36	6.488e-06	6.76474e-05	-0.333333
NR_148933	chr1	182838591	182840591	promoters	0.333333	0	45	36	6.488e-06	6.76474e-05	-0.333333
NM_002293	chr1	183024135	183103327	introns_1	1	0.0810811	33	37	2.61624e-18	8.87247e-17	-0.918919
NR_126347	chr1	187092947	187303465	introns_1	0.956522	0.5	46	48	1.2978e-07	1.61392e-06	-0.456522
NM_001331020	chr1	193059777	193075819	introns_1	0.642857	0.962963	84	54	1.74024e-06	1.91893e-05	0.320106
NM_001173524	chr1	193069034	193069634	exons_1	0.642857	0.962963	84	54	1.74024e-06	1.91893e-05	0.320106
NM_194314	chr1	197199354	197200590	exons_7	0.235294	0.0126582	119	79	7.96157e-07	9.12199e-06	-0.222636
NM_080921	chr1	198637967	198639967	promoters	1	0.484848	42	33	4.12217e-09	5.92761e-08	-0.515152
NM_002838	chr1	198638039	198640039	promoters	1	0.484848	42	33	4.12217e-09	5.92761e-08	-0.515152
NM_080921	chr1	198639342	198692346	introns_2	1	0.484848	42	33	4.12217e-09	5.92761e-08	-0.515152
NM_205860	chr1	200027912	200039657	introns_1	0.24183	0.0331126	153	151	2.59105e-08	3.42096e-07	-0.208717
NM_001276464	chr1	200042966	200043773	introns_1	0.25	0	48	42	4.3845e-05	0.000415621	-0.25
NM_001276464	chr1	200048819	200111201	introns_4	0.777778	0.228571	27	35	1.02741e-05	0.000104856	-0.549206
NM_001252103	chr1	201000717	201000780	exons_18	0.988372	0.142857	86	28	1.73797e-20	7.18942e-19	-0.845515
NM_001252103	chr1	201000781	201002160	introns_18	1	0.0740741	65	27	4.32095e-22	2.07852e-20	-0.925926
NM_000069	chr1	201052557	201052648	exons_13	0.785714	1	42	42	0.000231149	0.00197309	0.214286
NM_020443	chr1	201718390	201718755	exons_2	0.974359	0.102041	39	49	3.13336e-19	1.15901e-17	-0.872318
NR_049823	chr1	201718507	201720507	promoters	0.974359	0.102041	39	49	3.13336e-19	1.15901e-17	-0.872318
NM_004767	chr1	202127741	202133592	exons_2	0.208955	0.971014	67	69	7.88503e-23	3.97053e-21	0.762059
NM_001017403	chr1	202235994	202276305	introns_3	1	0.478261	32	23	3.66262e-07	4.35342e-06	-0.521739
NM_001017404	chr1	202235994	202297507	introns_1	1	0.765625	65	64	1.5869e-06	1.75445e-05	-0.234375
NM_001136504	chr1	202605790	202643277	introns_8	0.79661	0.594937	118	79	0.00223566	0.0156608	-0.201673
NM_177402	chr1	202605790	202710257	introns_1	0.79661	0.594937	118	79	0.00223566	0.0156608	-0.201673
NR_160550	chr1	203084574	203086482	introns_1	0.0645161	0.930233	31	43	9.00188e-16	2.40658e-14	0.865716
NM_002479	chr1	203085012	203087012	promoters	0.0645161	0.930233	31	43	9.00188e-16	2.40658e-14	0.865716
NM_002479	chr1	203085491	203086012	exons_2	0.0645161	0.930233	31	43	9.00188e-16	2.40658e-14	0.865716
NM_006763	chr1	203307104	203309601	exons_2	0.966102	0.614458	118	83	4.59845e-11	7.95081e-10	-0.351644
NM_001684	chr1	203627220	203682741	introns_1	0.973333	0.530612	75	49	5.57696e-10	8.61307e-09	-0.442721
NM_001365784	chr1	203628082	203682741	introns_1	0.973333	0.530612	75	49	5.57696e-10	8.61307e-09	-0.442721
NM_001376350	chr1	203795776	203802568	introns_1	1	0.552632	76	38	3.68812e-11	6.4486e-10	-0.447368
NM_001376360	chr1	203795776	203801574	introns_1	1	0.552632	76	38	3.68812e-11	6.4486e-10	-0.447368
NM_001376365	chr1	203795776	203802956	introns_1	1	0.552632	76	38	3.68812e-11	6.4486e-10	-0.447368
NM_001350264	chr1	203795795	203802568	introns_1	1	0.552632	76	38	3.68812e-11	6.4486e-10	-0.447368
NM_001376336	chr1	203795795	203816925	introns_1	1	0.552632	76	38	3.68812e-11	6.4486e-10	-0.447368
NM_001376342	chr1	203795795	203801574	introns_1	1	0.552632	76	38	3.68812e-11	6.4486e-10	-0.447368
NM_001376349	chr1	203795795	203802651	introns_1	1	0.552632	76	38	3.68812e-11	6.4486e-10	-0.447368
NM_001376364	chr1	203795795	203802956	introns_1	1	0.552632	76	38	3.68812e-11	6.4486e-10	-0.447368
NM_001376343	chr1	203796355	203801574	introns_1	1	0.552632	76	38	3.68812e-11	6.4486e-10	-0.447368
NM_001376358	chr1	203796497	203801574	introns_1	1	0.552632	76	38	3.68812e-11	6.4486e-10	-0.447368
NM_001174108	chr1	203796522	203798522	promoters	1	0.552632	76	38	3.68812e-11	6.4486e-10	-0.447368
NM_001376359	chr1	203796602	203801574	introns_1	1	0.552632	76	38	3.68812e-11	6.4486e-10	-0.447368
NM_001376361	chr1	203796608	203801574	introns_1	1	0.552632	76	38	3.68812e-11	6.4486e-10	-0.447368
NM_001377334	chr1	204429921	204430038	exons_5	1	0.733333	42	15	0.000670572	0.00525655	-0.266667
NM_001377334	chr1	204444425	204445955	introns_17	1	0.757576	60	33	2.22409e-05	0.000218022	-0.242424
NM_006338	chr1	204617170	204620218	exons_1	0.0909091	0.953488	33	43	2.48825e-16	7.05693e-15	0.862579
NM_015090	chr1	204988807	205009556	introns_1	0.975904	0.746269	83	67	1.14745e-05	0.000116511	-0.229635
NM_001160332	chr1	204991307	205009556	introns_1	0.975904	0.746269	83	67	1.14745e-05	0.000116511	-0.229635
NM_001005388	chr1	204997170	204997406	exons_1	0.980769	0.66	52	50	4.41153e-06	4.66581e-05	-0.320769
NM_001297613	chr1	205268950	205269884	exons_1	0.702703	0.983871	74	62	1.37504e-06	1.52545e-05	0.281168
NM_181644	chr1	205599252	205600405	introns_9	0.135135	0.736842	37	19	5.85313e-06	6.12716e-05	0.601707
NR_106919	chr1	206473802	206475802	promoters	0.0645161	0.96875	31	32	1.63467e-15	4.28281e-14	0.904234
NM_014002	chr1	206474331	206474471	exons_2	0.0645161	0.96875	31	32	1.63467e-15	4.28281e-14	0.904234
NM_182665	chr1	206556163	206558163	promoters	0.316129	0	155	74	2.72166e-11	4.85386e-10	-0.316129
NM_182665	chr1	206557164	206557693	exons_1	0.22619	0	84	36	0.000105435	0.000948239	-0.22619
NM_153758	chr1	206771079	206798860	introns_1	0.969231	0.22449	65	49	1.2053e-18	4.18149e-17	-0.744741
NR_167982	chr1	207960240	207965627	introns_2	0.257143	0	35	26	0.000843075	0.00651744	-0.257143
NR_167983	chr1	207960240	207967456	introns_1	0.257143	0	35	26	0.000843075	0.00651744	-0.257143
NM_014388	chr1	209851204	209857565	exons_12	0.971429	0.685714	35	35	0.000701884	0.00548867	-0.285714
NR_125984	chr1	212238977	212284978	introns_1	0.360465	0.918367	86	49	2.11528e-11	3.82281e-10	0.557902
NM_001300757	chr1	213008467	213015608	introns_1	1	0.576923	43	26	5.39888e-07	6.29935e-06	-0.423077
NR_125333	chr1	213008467	213015612	introns_1	1	0.576923	43	26	5.39888e-07	6.29935e-06	-0.423077
NM_001300753	chr1	213011459	213015612	introns_1	1	0.576923	43	26	5.39888e-07	6.29935e-06	-0.423077
NM_001300755	chr1	213011459	213015148	introns_1	1	0.576923	43	26	5.39888e-07	6.29935e-06	-0.423077
NM_144567	chr1	213013093	213013418	exons_1	1	0.576923	43	26	5.39888e-07	6.29935e-06	-0.423077
NR_037850	chr1	213822434	213832521	introns_1	1	0.75	34	12	0.00321001	0.0214885	-0.25
NM_002763	chr1	213998261	214005164	introns_2	0.978495	0.489796	93	49	9.6071e-13	1.97152e-11	-0.488699
NM_002763	chr1	214011716	214035648	introns_4	0.937984	0.530303	129	66	3.41226e-11	6.01137e-10	-0.407681
NM_001017424	chr1	215004541	215006541	promoters	0.974359	0.658228	156	79	2.37802e-11	4.27006e-10	-0.316131
NM_001017424	chr1	215005542	215005955	exons_1	0.974359	0.658228	156	79	2.37802e-11	4.27006e-10	-0.316131
NM_206933	chr1	215650802	215670971	introns_8	0.985294	0.596154	68	52	6.22808e-09	8.76949e-08	-0.38914
NM_206933	chr1	215934796	215965316	introns_35	1	0.555556	47	18	1.0908e-06	1.22339e-05	-0.444444
NM_001350124	chr1	216507184	216519151	introns_1	0.975155	0.0239521	161	167	1.70049e-84	1.29689e-81	-0.951203
NM_001243506	chr1	216651090	216939581	introns_1	0.934211	0.622951	152	122	8.7292e-11	1.45762e-09	-0.31126
NM_001243510	chr1	216677492	216865060	introns_1	1	0.527473	108	91	1.47628e-19	5.62434e-18	-0.472527
NM_001243514	chr1	216677492	216804942	introns_1	1	0.527473	108	91	1.47628e-19	5.62434e-18	-0.472527
NM_001350124	chr1	216677492	216854946	introns_1	1	0.527473	108	91	1.47628e-19	5.62434e-18	-0.472527
NM_001243509	chr1	216677492	216939581	introns_1	0.934211	0.622951	152	122	8.7292e-11	1.45762e-09	-0.31126
NM_001350123	chr1	216677492	216905564	introns_1	0.934211	0.622951	152	122	8.7292e-11	1.45762e-09	-0.31126
NM_001438	chr1	216677492	216723243	introns_1	1	0.615385	63	52	1.19621e-09	1.78119e-08	-0.384615
NM_001243518	chr1	216707487	216723243	introns_1	1	0.615385	63	52	1.19621e-09	1.78119e-08	-0.384615
NM_001243513	chr1	216715250	216939581	introns_1	0.915254	0.540816	118	98	1.23498e-10	2.03147e-09	-0.374438
NM_001243515	chr1	216715250	216723243	introns_1	1	0.321429	29	28	9.63265e-10	1.45156e-08	-0.678571
NM_001243519	chr1	216715250	216723239	introns_1	1	0.321429	29	28	9.63265e-10	1.45156e-08	-0.678571
NM_018040	chr1	217514890	217610320	introns_5	0.978495	0.760563	93	71	7.20048e-06	7.47417e-05	-0.217931
NR_031644	chr1	218807188	219108086	introns_4	0.956044	0.588235	91	34	8.90237e-07	1.01473e-05	-0.367809
NR_038845	chr1	219086661	219149938	introns_2	0.911765	0.125	34	16	1.75055e-08	2.3452e-07	-0.786765
NR_135822	chr1	219469844	219557190	introns_3	0.96875	0.647541	160	122	1.5821e-13	3.4893e-12	-0.321209
NM_004446	chr1	219988590	219988823	exons_14	1	0.673913	39	46	4.28356e-06	4.54307e-05	-0.326087
NM_001286128	chr1	220618756	220631034	introns_4	0.363636	0.961538	33	26	3.08365e-07	3.69879e-06	0.597902
NM_022746	chr1	220813292	220819659	exons_7	0.704545	1	44	29	0.000108412	0.000972927	0.295455
NR_046901	chr1	220833193	220879848	introns_2	0.208556	0	187	171	1.19924e-13	2.67713e-12	-0.208556
NM_021958	chr1	220882164	220882348	exons_2	0.936	0.25	125	152	2.06319e-34	2.16898e-32	-0.686
NM_001146068	chr1	223755480	223755649	exons_9	0.142857	1	28	16	8.39423e-10	1.27482e-08	0.857143
NM_025160	chr1	224431782	224433683	introns_2	0.8	0	45	19	6.43364e-11	1.09081e-09	-0.8
NM_014698	chr1	225871076	225871113	exons_20	0.941176	0.533333	34	15	0.00101639	0.0077151	-0.407843
NM_014698	chr1	225879411	225882303	introns_24	0.489362	0.95	47	20	8.49142e-05	0.000772962	0.460638
NM_002107	chr1	226064329	226064479	exons_1	0.258065	0	31	52	3.31191e-05	0.00031768	-0.258065
NM_001379045	chr1	226064334	226064479	exons_1	0.258065	0	31	52	3.31191e-05	0.00031768	-0.258065
NM_002221	chr1	226648772	226735526	introns_6	0.542857	0.930876	280	217	7.88103e-24	4.46124e-22	0.388018
NM_002221	chr1	226735527	226737663	exons_1	0.521739	0.298507	92	67	0.00459758	0.0294743	-0.223232
NR_168380	chr1	227785811	227787811	promoters	1	0.025	64	40	9.88291e-30	8.07593e-28	-0.975
NR_168382	chr1	227786390	227788390	promoters	1	0.025	64	40	9.88291e-30	8.07593e-28	-0.975
NR_168383	chr1	227786651	227788651	promoters	0.961538	0.0116279	156	86	3.31095e-58	9.25875e-56	-0.949911
NR_168380	chr1	227787152	227789104	introns_1	0.954545	0	176	99	9.40236e-68	3.6859e-65	-0.954545
NR_168381	chr1	227787152	227789147	introns_1	0.954545	0	176	99	9.40236e-68	3.6859e-65	-0.954545
NR_168382	chr1	227787468	227789104	introns_1	0.954545	0	176	99	9.40236e-68	3.6859e-65	-0.954545
NR_168384	chr1	227787519	227789519	promoters	0.954545	0	176	99	9.40236e-68	3.6859e-65	-0.954545
NR_168383	chr1	227787652	227788011	exons_1	1	0	28	19	1.66866e-15	4.36098e-14	-1
NR_168383	chr1	227788012	227789147	introns_1	0.945946	0	148	80	1.5407e-54	3.89315e-52	-0.945946
NR_168384	chr1	227788520	227788899	exons_1	0.964286	0	56	34	2.14344e-24	1.25571e-22	-0.964286
NM_001122835	chr1	230924841	230924973	exons_4	0.913043	0.482759	69	58	3.65005e-08	4.7445e-07	-0.430285
NM_175876	chr1	231332753	231337852	exons_1	0.423729	0.0480769	59	104	3.06905e-09	4.44524e-08	-0.375652
NM_001261462	chr1	231351304	231355023	exons_1	1	0.78125	31	32	0.00130724	0.00969332	-0.21875
NM_032018	chr1	231351304	231351571	exons_1	1	0.78125	31	32	0.00130724	0.00969332	-0.21875
NM_001377488	chr1	232574223	232630429	introns_1	0.914894	0.263158	47	19	1.16118e-07	1.4522e-06	-0.651736
NM_020808	chr1	232574223	232629868	introns_1	0.914894	0.263158	47	19	1.16118e-07	1.4522e-06	-0.651736
NM_001300845	chr1	234309101	234309320	exons_1	0.973684	0	38	13	1.07836e-12	2.20433e-11	-0.973684
NM_005646	chr1	234401181	234401262	exons_6	0.953488	0.468085	43	47	7.96876e-08	1.01352e-06	-0.485403
NR_125945	chr1	234959917	234963766	introns_3	0.963636	0	55	33	8.7329e-24	4.90375e-22	-0.963636
NR_125945	chr1	234962999	234964999	promoters	0.963636	0	55	33	8.7329e-24	4.90375e-22	-0.963636
NM_001035	chr1	237610762	237610988	exons_19	1	0.666667	40	45	2.82249e-06	3.05774e-05	-0.333333
NM_001035	chr1	237610989	237614038	introns_19	1	0.586957	51	46	6.81279e-09	9.52564e-08	-0.413043
NM_001035	chr1	237614039	237614843	exons_20	0.1	0.958333	30	48	2.98621e-16	8.43499e-15	0.858333
NM_001348094	chr1	240334230	240392510	introns_1	1	0.55	58	40	5.69024e-10	8.77511e-09	-0.45
NM_001305424	chr1	240355909	240392510	introns_1	1	0.55	58	40	5.69024e-10	8.77511e-09	-0.45
NM_001350116	chr1	241354826	241356826	promoters	0.560976	0.121212	41	33	4.83995e-05	0.000455705	-0.439763
NM_001374811	chr1	241355699	241355826	exons_1	0.560976	0.121212	41	33	4.83995e-05	0.000455705	-0.439763
NM_006027	chr1	241858506	241858718	exons_5	0.909091	0.666667	33	51	0.00737014	0.0446875	-0.242424
NM_001350249	chr1	243426559	243489013	introns_4	0.942029	0.528571	69	70	6.35297e-09	8.93634e-08	-0.413458
NM_001278196	chr1	244048994	244053787	introns_1	0.456954	0	151	47	4.70648e-12	9.06003e-11	-0.456954
NM_205768	chr1	244050282	244052282	promoters	0.456954	0	151	47	4.70648e-12	9.06003e-11	-0.456954
NM_006352	chr1	244052204	244054204	promoters	0.959677	0.54902	124	102	1.54782e-14	3.72917e-13	-0.410658
NM_006352	chr1	244053205	244057478	exons_1	0.959677	0.54902	124	102	1.54782e-14	3.72917e-13	-0.410658
NM_001278196	chr1	244053788	244057478	exons_1	0.959677	0.54902	124	102	1.54782e-14	3.72917e-13	-0.410658
NM_205768	chr1	244053788	244057476	exons_1	0.959677	0.54902	124	102	1.54782e-14	3.72917e-13	-0.410658
NM_018012	chr1	245646281	245684232	introns_8	0.95122	0.45	41	20	9.08594e-06	9.3183e-05	-0.50122
NM_032752	chr1	247297415	247301276	exons_1	0.953704	0.5	108	70	5.14144e-13	1.08264e-11	-0.453704
NM_001281834	chr1	247507234	247526939	introns_1	0.968326	0.00892857	221	112	3.74433e-80	2.57475e-77	-0.959397
NM_001281837	chr1	247517451	247519451	promoters	0.968326	0.00892857	221	112	3.74433e-80	2.57475e-77	-0.959397
NM_030904	chr1	248404994	248406994	promoters	0.217391	0.965517	46	29	6.78321e-12	1.28339e-10	0.748126
NM_030904	chr1	248405995	248407104	exons_1	0.217391	0.965517	46	29	6.78321e-12	1.28339e-10	0.748126
NM_001085474	chr1	248750644	248751029	introns_4	0.927273	0.619048	55	21	0.00182631	0.0131581	-0.308225
NM_001370119	chr10	246974	248335	introns_1	0.0307692	0.909091	65	77	1.45979e-30	1.25477e-28	0.878322
NM_001370103	chr10	247398	247466	exons_1	0.0307692	0.909091	65	77	1.45979e-30	1.25477e-28	0.878322
NR_131187	chr10	3318857	3748687	introns_1	0.854962	0.242424	131	33	1.36035e-11	2.49941e-10	-0.612538
NR_155743	chr10	3434979	3497652	introns_2	0.854962	0.242424	131	33	1.36035e-11	2.49941e-10	-0.612538
NM_003739	chr10	5099327	5099449	exons_3	0.960784	0.714286	51	21	0.00412203	0.0268566	-0.246499
NR_136554	chr10	6221528	6223957	introns_1	1	0.777778	28	18	0.00439979	0.0283797	-0.222222
NM_001282630	chr10	6222985	6223957	introns_2	1	0.777778	28	18	0.00439979	0.0283797	-0.222222
NM_001320886	chr10	7788264	7797046	introns_1	0.903226	0.02	62	50	7.36913e-25	4.53234e-23	-0.883226
NM_005174	chr10	7788264	7796120	introns_1	0.903226	0.02	62	50	7.36913e-25	4.53234e-23	-0.883226
NM_001002295	chr10	8058842	8063992	introns_1	0.89404	0.281553	151	103	8.47967e-25	5.16988e-23	-0.612486
NM_002051	chr10	8058842	8063995	introns_1	0.89404	0.281553	151	103	8.47967e-25	5.16988e-23	-0.612486
NR_120635	chr10	9199047	9270275	introns_1	0.605634	1	71	15	0.000265546	0.00224478	0.394366
NM_014688	chr10	11453946	11463849	exons_1	1	0.03125	71	32	2.7197e-27	1.91732e-25	-0.96875
NM_001080491	chr10	11460510	11463849	exons_1	1	0.03125	71	32	2.7197e-27	1.91732e-25	-0.96875
NM_024693	chr10	11749495	11749592	exons_3	1	0.75	33	20	0.00111396	0.00840554	-0.25
NM_006023	chr10	12250311	12250589	exons_13	1	0.76	33	25	0.000897976	0.00690242	-0.24
NM_001351032	chr10	12390000	12403101	introns_2	0.594595	1	37	44	1.44303e-07	1.78132e-06	0.405405
NM_001318337	chr10	13659323	13659490	exons_5	1	0.515152	52	33	1.52371e-09	2.24969e-08	-0.484848
NR_134578	chr10	14097139	14330057	introns_1	1	0.306122	97	49	3.95275e-23	2.07772e-21	-0.693878
NR_034181	chr10	14878920	14896845	introns_1	0.882353	0.405405	34	37	1.53865e-05	0.000153961	-0.476948
NM_024670	chr10	14879128	14896845	introns_1	0.882353	0.405405	34	37	1.53865e-05	0.000153961	-0.476948
NM_001193427	chr10	14881500	14881645	exons_1	0.882353	0.405405	34	37	1.53865e-05	0.000153961	-0.476948
NM_001010924	chr10	15211645	15214601	exons_1	0.989796	0.538462	98	130	6.92764e-18	2.27376e-16	-0.451334
NM_001081	chr10	16890371	16890527	exons_13	1	0.666667	49	12	0.000159885	0.0014004	-0.333333
NM_001282736	chr10	20001987	20068169	introns_1	0.9375	0.407407	32	27	4.30996e-06	4.56529e-05	-0.530093
NM_032812	chr10	20047016	20068169	introns_2	0.9375	0.407407	32	27	4.30996e-06	4.56529e-05	-0.530093
NM_207371	chr10	21519659	21521388	introns_1	0.719298	0.286822	114	129	7.82982e-12	1.47173e-10	-0.432477
NM_001098500	chr10	23695235	24007224	introns_1	0.635468	0.362745	203	102	6.01976e-06	6.29535e-05	-0.272723
NM_020752	chr10	25466720	25550975	introns_5	0.583333	1	36	34	1.04724e-06	1.178e-05	0.416667
NM_001134366	chr10	26270757	26273635	introns_10	1	0.733333	42	15	0.000670572	0.00525655	-0.266667
NM_001242702	chr10	27672874	27675415	exons_1	1	0.722222	42	18	0.00028752	0.00241883	-0.277778
NM_012342	chr10	28677974	28681257	introns_1	0.538462	0	26	44	5.05877e-09	7.17117e-08	-0.538462
NR_110921	chr10	29415413	29482832	introns_1	1	0.697674	56	43	8.26693e-07	9.45636e-06	-0.302326
NR_110927	chr10	29415413	29487154	introns_1	1	0.697674	56	43	8.26693e-07	9.45636e-06	-0.302326
NR_110920	chr10	29458521	29482832	introns_1	1	0.697674	56	43	8.26693e-07	9.45636e-06	-0.302326
NM_001323599	chr10	29467876	29470275	introns_1	1	0.697674	56	43	8.26693e-07	9.45636e-06	-0.302326
NM_001323599	chr10	29550597	29551263	exons_1	0.709677	0	31	52	1.88966e-14	4.51131e-13	-0.709677
NM_001350021	chr10	30026103	30029866	exons_2	1	0.0555556	32	36	6.80432e-19	2.43735e-17	-0.944444
NM_001350022	chr10	30047872	30069699	introns_1	1	0.652174	39	23	2.25222e-05	0.000220471	-0.347826
NM_020848	chr10	30047872	30059481	introns_1	1	0.652174	39	23	2.25222e-05	0.000220471	-0.347826
NM_001143766	chr10	30850368	30876997	introns_1	0.986842	0.6	76	25	5.07245e-07	5.93664e-06	-0.386842
NM_001143769	chr10	30850368	30875330	introns_1	0.986842	0.6	76	25	5.07245e-07	5.93664e-06	-0.386842
NM_001143770	chr10	30857779	30876997	introns_2	0.986842	0.6	76	25	5.07245e-07	5.93664e-06	-0.386842
NM_001024628	chr10	33226290	33254027	introns_5	1	0.785714	45	14	0.00245998	0.0170219	-0.214286
NM_001184786	chr10	34109560	34111562	exons_1	0.991071	0.773585	112	106	3.39235e-08	4.4315e-07	-0.217487
NM_001184787	chr10	34109561	34111562	exons_1	0.991071	0.773585	112	106	3.39235e-08	4.4315e-07	-0.217487
NM_001184787	chr10	34401918	34450316	introns_7	1	0.477273	44	44	2.28992e-10	3.64665e-09	-0.522727
NM_001184791	chr10	34401918	34470084	introns_1	1	0.477273	44	44	2.28992e-10	3.64665e-09	-0.522727
NR_134479	chr10	42872509	42874060	exons_2	0.677419	1	31	15	0.00244089	0.0169037	0.322581
NM_006963	chr10	45003280	45005326	exons_2	0.857692	0.25	260	180	1.17087e-39	1.60501e-37	-0.607692
NM_002900	chr10	47348363	47351538	exons_1	0.513889	0.982759	72	58	4.14322e-11	7.18443e-10	0.46887
NM_001347735	chr10	48459892	48555462	introns_1	0.333333	1	33	21	2.59712e-08	3.42683e-07	0.666667
NR_045675	chr10	48479765	48555462	introns_1	0.333333	1	33	21	2.59712e-08	3.42683e-07	0.666667
NM_001098512	chr10	50991645	51153163	introns_1	0.578313	0.267857	83	56	0.000255074	0.00216338	-0.310456
NM_001374782	chr10	51467837	51804584	introns_1	0.470588	0.946429	68	56	1.18618e-09	1.76877e-08	0.47584
NM_001204880	chr10	58335226	58361337	introns_1	0.272727	1	55	31	1.67985e-13	3.69496e-12	0.727273
NM_020987	chr10	60106060	60108829	introns_9	0.726667	0.96	150	125	3.52519e-08	4.59787e-07	0.233333
NM_001204403	chr10	60615225	60733262	introns_1	0.574074	0.825397	108	63	0.000533366	0.0042582	0.251323
NM_032199	chr10	62000091	62000321	exons_4	0.954198	0.115044	131	113	2.01107e-46	3.69985e-44	-0.839154
NM_032199	chr10	62069798	62085701	introns_4	0.97619	0.722222	84	54	6.62763e-06	6.90176e-05	-0.253968
NM_001136179	chr10	62811996	62814468	exons_1	0.806452	0	31	14	2.13884e-08	2.84091e-07	-0.806452
NM_001322252	chr10	63219984	63380317	introns_1	0.698113	0.903509	106	114	9.72081e-05	0.000877069	0.205396
NM_001318154	chr10	63264765	63380317	introns_1	0.698113	0.903509	106	114	9.72081e-05	0.000877069	0.205396
NM_001282948	chr10	63268223	63270223	promoters	0.698113	0.903509	106	114	9.72081e-05	0.000877069	0.205396
NM_001318153	chr10	63268243	63270243	promoters	0.698113	0.903509	106	114	9.72081e-05	0.000877069	0.205396
NM_001282948	chr10	63268663	63269223	exons_1	0.698113	0.903509	106	114	9.72081e-05	0.000877069	0.205396
NM_001318153	chr10	63268663	63269243	exons_1	0.698113	0.903509	106	114	9.72081e-05	0.000877069	0.205396
NM_001001330	chr10	63566411	63594777	introns_1	0.931818	0.588235	44	17	0.0020662	0.0146697	-0.343583
NM_001127384	chr10	67219871	67521841	introns_2	0.542056	0.972222	107	36	9.90142e-08	1.25023e-06	0.430166
NM_080722	chr10	70744190	70745225	introns_8	0	0.967742	25	31	1.26161e-16	3.66988e-15	0.967742
NM_022124	chr10	71511213	71566741	introns_3	0.74183	0.961207	306	232	2.3e-13	4.98325e-12	0.219377
NM_001042465	chr10	71834506	71851181	introns_6	1	0.714286	38	42	3.06221e-05	0.000294807	-0.285714
NM_001318124	chr10	72953806	72955806	promoters	0.210526	1	38	14	1.76436e-08	2.3608e-07	0.789474
NR_038373	chr10	73248451	73272812	introns_2	0.971429	0	35	24	3.02012e-17	9.34923e-16	-0.971429
NM_016065	chr10	73251644	73253644	promoters	0.971429	0	35	24	3.02012e-17	9.34923e-16	-0.971429
NR_134458	chr10	73251740	73253740	promoters	0.971429	0	35	24	3.02012e-17	9.34923e-16	-0.971429
NM_016065	chr10	73251763	73252023	exons_2	0.971429	0	35	24	3.02012e-17	9.34923e-16	-0.971429
NM_001370139	chr10	74825357	74838682	introns_1	0.215517	0	116	77	1.2841e-07	1.59736e-06	-0.215517
NM_001370133	chr10	74825675	74838682	introns_1	0.215517	0	116	77	1.2841e-07	1.59736e-06	-0.215517
NM_001370143	chr10	74825675	74842599	introns_1	0.215517	0	116	77	1.2841e-07	1.59736e-06	-0.215517
NM_001370132	chr10	74826786	74838682	introns_1	0.215517	0	116	77	1.2841e-07	1.59736e-06	-0.215517
NM_001370142	chr10	74826786	74842599	introns_1	0.215517	0	116	77	1.2841e-07	1.59736e-06	-0.215517
NM_001003892	chr10	75058549	75073568	introns_3	0.653846	0.962963	26	27	0.00236767	0.0164537	0.309117
NM_001384909	chr10	75058549	75073101	introns_1	0.653846	0.962963	26	27	0.00236767	0.0164537	0.309117
NR_131178	chr10	75647594	75882655	introns_1	0.957494	0.752066	447	363	2.72786e-18	9.23509e-17	-0.205428
NR_132791	chr10	75711454	75713454	promoters	0.935897	0	78	57	2.71694e-34	2.83495e-32	-0.935897
NM_001305581	chr10	76324486	76557208	introns_4	0.766423	0.975845	274	207	1.14912e-12	2.34099e-11	0.209422
NR_024585	chr10	77925811	77927811	promoters	0.342105	0	38	31	2.26243e-05	0.000221315	-0.342105
NR_024585	chr10	77926812	77929825	exons_1	0.342105	0	38	31	2.26243e-05	0.000221315	-0.342105
NM_153367	chr10	79432558	79432758	exons_3	0.560976	0.974576	205	118	7.25176e-19	2.58219e-17	0.413601
NM_153367	chr10	79444624	79446624	promoters	0.201342	0	149	129	1.91445e-10	3.07644e-09	-0.201342
NR_120661	chr10	80534942	80536942	promoters	0.015873	0.333333	63	18	0.000142291	0.00125786	0.31746
NR_120661	chr10	80535580	80535942	exons_2	0.015873	0.333333	63	18	0.000142291	0.00125786	0.31746
NM_001080115	chr10	86681804	86691895	introns_1	0.0666667	0.967742	30	31	6.05023e-15	1.50702e-13	0.901075
NM_001080116	chr10	86687273	86691895	introns_2	0.0666667	0.967742	30	31	6.05023e-15	1.50702e-13	0.901075
NM_001080114	chr10	86709905	86710050	exons_1	0.988095	0.540984	84	61	1.45115e-12	2.93633e-11	-0.447112
NM_024756	chr10	86937126	86942316	introns_1	0.987179	0.297872	78	47	8.59529e-19	3.03228e-17	-0.689307
NM_024756	chr10	86942317	86944128	exons_2	0.266667	0.0638298	45	47	0.00683556	0.0419249	-0.202837
NM_004670	chr10	87713075	87713310	exons_3	0.647059	1	34	25	8.47664e-05	0.000771952	0.352941
NM_001549	chr10	89338661	89340968	exons_1	0.0142857	0.958333	70	24	6.52227e-21	2.81175e-19	0.944048
NM_213606	chr10	89438604	89439183	exons_3	0.00952381	0.965909	105	88	1.8012e-51	3.91466e-49	0.956385
NM_019860	chr10	90748834	90749594	exons_1	0.0740741	0.3375	108	80	3.76594e-06	4.02461e-05	0.263426
NM_019859	chr10	90748839	90749594	exons_1	0.0740741	0.3375	108	80	3.76594e-06	4.02461e-05	0.263426
NM_014391	chr10	90915543	90915641	exons_2	0.985507	0	69	28	2.84968e-25	1.79748e-23	-0.985507
NM_014391	chr10	90915782	90915880	exons_3	1	0.0294118	39	34	1.11355e-21	5.09924e-20	-0.970588
NM_014391	chr10	90916171	90916269	exons_4	0.94186	0	86	20	1.22895e-18	4.25328e-17	-0.94186
NM_013451	chr10	93431517	93452049	introns_14	0.948276	0.688889	58	45	0.00033473	0.00278473	-0.259387
NM_001288989	chr10	94030683	94032252	exons_2	0.0288462	0.891566	104	83	1.09542e-38	1.40516e-36	0.86272
NM_001165979	chr10	94304646	94306426	introns_3	0.576923	1	26	41	7.78672e-07	8.92897e-06	0.423077
NM_000769	chr10	94775390	94775539	exons_3	0.95082	0.544118	61	68	2.39948e-08	3.17604e-07	-0.406702
NM_000769	chr10	94852733	94855547	exons_9	0.944444	0.174603	72	63	3.21382e-22	1.5657e-20	-0.769841
NM_000771	chr10	94947779	94947939	exons_4	0.758621	0.0625	29	16	1.77429e-06	1.95443e-05	-0.696121
NM_001377207	chr10	95410778	95421960	introns_1	0.988764	0.131148	89	61	8.67105e-32	8.11866e-30	-0.857617
NM_001034956	chr10	95414656	95421960	introns_1	0.988764	0.131148	89	61	8.67105e-32	8.11866e-30	-0.857617
NM_001377197	chr10	95414863	95421960	introns_1	0.988764	0.131148	89	61	8.67105e-32	8.11866e-30	-0.857617
NM_001323417	chr10	95610293	95611255	introns_2	1	0.655172	29	29	6.46399e-05	0.00059844	-0.344828
NM_001164183	chr10	95755162	95757162	promoters	0.535714	0.9375	28	16	0.0028695	0.0195555	0.401786
NM_001349008	chr10	95983606	95983809	exons_13	1	0.791667	31	24	0.0027801	0.0189956	-0.208333
NR_047683	chr10	96192093	96200074	introns_1	1	0.733333	36	15	0.00110397	0.00834062	-0.266667
NR_047680	chr10	96196908	96197063	exons_1	1	0.733333	36	15	0.00110397	0.00834062	-0.266667
NM_001040102	chr10	96349827	96358893	introns_1	0.947368	0.554054	57	74	7.91562e-08	1.00706e-06	-0.393314
NM_001284321	chr10	96351411	96358893	introns_1	0.947368	0.554054	57	74	7.91562e-08	1.00706e-06	-0.393314
NR_104296	chr10	96355291	96358893	introns_1	0.947368	0.554054	57	74	7.91562e-08	1.00706e-06	-0.393314
NM_001284324	chr10	96356159	96358159	promoters	1	0	27	28	2.52732e-18	8.5978e-17	-1
NM_012465	chr10	96370065	96370315	exons_2	1	0	87	41	8.62825e-37	1.01378e-34	-1
NM_012465	chr10	96373810	96376691	introns_3	1	0	32	14	5.52264e-14	1.26864e-12	-1
NM_152309	chr10	96645663	96648658	introns_10	1	0.695652	38	23	9.63742e-05	0.000871795	-0.304348
NM_152309	chr10	96709567	96709983	exons_16	0.580645	0.267857	62	56	0.000534497	0.00426642	-0.312788
NM_003015	chr10	97766751	97767860	exons_1	0.5	0.976744	36	43	1.37537e-07	1.70483e-06	0.476744
NM_001010917	chr10	97865590	97871578	exons_1	0.5	1	26	22	7.62927e-06	7.88608e-05	0.5
NM_018058	chr10	97865715	97880248	introns_1	0.5	1	26	22	7.62927e-06	7.88608e-05	0.5
NM_018058	chr10	97884352	97895244	introns_3	0.324324	0.736842	37	19	0.00298036	0.0201668	0.412518
NM_021828	chr10	99234852	99236852	promoters	0.461538	0	78	41	6.3152e-10	9.69966e-09	-0.461538
NM_001166246	chr10	99234875	99236875	promoters	0.461538	0	78	41	6.3152e-10	9.69966e-09	-0.461538
NM_001320974	chr10	99694293	99696541	exons_1	0.794872	1	39	24	0.00379848	0.0249618	0.205128
NM_020354	chr10	99695956	99696122	exons_1	0.794872	1	39	24	0.00379848	0.0249618	0.205128
NM_001320974	chr10	99696542	99716347	introns_1	0.0465116	1	43	44	1.88287e-24	1.1171e-22	0.953488
NM_001349963	chr10	99704452	99711245	exons_1	0.0465116	1	43	44	1.88287e-24	1.1171e-22	0.953488
NM_020354	chr10	99704452	99711241	exons_1	0.0465116	1	43	44	1.88287e-24	1.1171e-22	0.953488
NM_000392	chr10	99834380	99834535	exons_24	0.958333	0.74359	48	39	0.00305155	0.0205491	-0.214744
NR_144759	chr10	100156235	100158983	introns_1	0.983607	0.684211	61	38	1.06325e-05	0.00010825	-0.299396
NR_144760	chr10	100156235	100164003	introns_1	0.983607	0.684211	61	38	1.06325e-05	0.00010825	-0.299396
NM_001253837	chr10	100299719	100329210	introns_14	0.980769	0.3	52	20	3.50129e-10	5.49028e-09	-0.680769
NM_005063	chr10	100356532	100356764	exons_5	0	0.966667	31	30	3.39076e-18	1.14332e-16	0.966667
NM_001304569	chr10	100735734	100746192	introns_1	0.28481	0	316	283	5.70252e-30	4.74599e-28	-0.28481
NM_032429	chr10	100997235	101002496	introns_1	0.978261	0.703704	46	27	0.000512625	0.00410982	-0.274557
NM_001318099	chr10	100998411	101002496	introns_1	0.978261	0.703704	46	27	0.000512625	0.00410982	-0.274557
NM_001318100	chr10	100999953	101002496	introns_1	0.978261	0.703704	46	27	0.000512625	0.00410982	-0.274557
NM_001318101	chr10	101001496	101003496	promoters	0.978261	0.703704	46	27	0.000512625	0.00410982	-0.274557
NM_001323541	chr10	101624811	101667885	introns_4	1	0.745098	34	51	0.000118204	0.00105696	-0.254902
NM_006993	chr10	101782258	101782351	exons_3	0.461538	0.0526316	39	19	0.000626643	0.00492877	-0.408907
NR_073110	chr10	102405537	102407222	introns_6	0.366667	0.962963	30	27	3.62e-07	4.30521e-06	0.596296
NM_002779	chr10	102411058	102411116	exons_2	0.33	0	100	70	1.97476e-10	3.17005e-09	-0.33
NM_024789	chr10	102475722	102477045	exons_10	0.454545	0.966667	33	30	1.71158e-06	1.88931e-05	0.512121
NM_000102	chr10	102834785	102835014	exons_6	1	0.76	39	25	0.000460166	0.00371982	-0.24
NM_014631	chr10	103594027	103603789	exons_1	0.701493	0.98913	67	92	2.09844e-08	2.78901e-07	0.287638
NM_025145	chr10	104207825	104212006	introns_33	0.0779221	1	77	14	2.333e-13	5.04693e-12	0.922078
NM_001191013	chr10	104278117	104297577	introns_2	0.828025	0.396226	157	159	8.35508e-16	2.24368e-14	-0.431799
NM_001191014	chr10	104279472	104297577	introns_2	0.744681	0	94	90	8.69108e-32	8.11929e-30	-0.744681
NM_033397	chr10	104309696	104316064	exons_1	0.898551	0.534884	69	86	3.23194e-07	3.86782e-06	-0.363667
NM_001272013	chr10	104309700	104316064	exons_1	0.898551	0.534884	69	86	3.23194e-07	3.86782e-06	-0.363667
NM_001008723	chr10	104406794	104447697	introns_15	0.957895	0.533333	95	30	9.79312e-08	1.23767e-06	-0.424561
NM_014978	chr10	104915933	104977334	introns_2	0.948718	0.645161	39	31	0.00086734	0.00668408	-0.303557
NR_120625	chr10	105673689	105817917	introns_1	0.0169492	1	59	16	5.51142e-17	1.65366e-15	0.983051
NM_058222	chr10	112293738	112293841	exons_6	0.970588	0.447761	102	67	5.13019e-16	1.40281e-14	-0.522827
NM_001198525	chr10	113146098	113150982	introns_1	0.972973	0	37	18	3.97945e-15	1.00193e-13	-0.972973
NM_001198528	chr10	113146098	113150997	introns_1	0.972973	0	37	18	3.97945e-15	1.00193e-13	-0.972973
NM_001351064	chr10	114302485	114304718	introns_3	0.972222	0.0869565	36	23	1.08514e-13	2.43929e-12	-0.885266
NM_001351064	chr10	114304719	114304930	exons_4	1	0	40	16	2.70655e-16	7.67089e-15	-1
NM_207303	chr10	115727356	115847876	introns_20	0.988971	0.783251	272	203	4.71906e-15	1.18318e-13	-0.205719
NM_000936	chr10	116556000	116556118	exons_9	0.717742	0.942308	124	52	0.000293046	0.00246236	0.224566
NM_006229	chr10	116605554	116609052	introns_11	0.975	0.347826	40	23	1.30388e-08	1.76941e-07	-0.627174
NM_005396	chr10	116626864	116626998	exons_5	0	0.546667	95	75	3.82438e-20	1.52488e-18	0.546667
NM_025015	chr10	116741566	116743566	promoters	0.911765	0	34	18	1.65238e-12	3.32106e-11	-0.911765
NM_001242699	chr10	116879359	116879868	introns_12	1	0.25	34	24	2.12117e-11	3.83182e-10	-0.75
NM_001242699	chr10	116879869	116879986	exons_12	0.935484	0.543478	93	46	7.4303e-08	9.47041e-07	-0.392006
NM_181840	chr10	117209497	117210299	exons_3	0.491525	1	59	20	1.51559e-06	1.67783e-05	0.508475
NR_026939	chr10	118052197	118206521	introns_1	1	0.212766	36	47	6.02042e-16	1.63346e-14	-0.787234
NR_026940	chr10	118052197	118207435	introns_1	1	0.212766	36	47	6.02042e-16	1.63346e-14	-0.787234
NM_001291879	chr10	122237395	122237538	exons_1	0.611111	0.974359	36	39	2.66184e-05	0.000258278	0.363248
NM_001010912	chr10	122697709	122698488	exons_1	0.212963	0.796296	108	54	4.21217e-13	8.92341e-12	0.583333
NM_001010912	chr10	122698846	122700846	promoters	1	0.235294	35	34	1.70183e-13	3.72938e-12	-0.764706
NM_001010912	chr10	122699337	122699412	exons_2	1	0.235294	35	34	1.70183e-13	3.72938e-12	-0.764706
NM_001330174	chr10	123034516	123040465	introns_1	0.986486	0.35	74	20	6.61666e-11	1.11957e-09	-0.636486
NM_001609	chr10	123037848	123040465	introns_2	0.986486	0.35	74	20	6.61666e-11	1.11957e-09	-0.636486
NM_001270764	chr10	124007668	124010339	exons_1	0.979381	0.4	97	40	1.04345e-14	2.5373e-13	-0.579381
NM_014661	chr10	124623605	124681606	introns_1	0.529851	0.876923	268	195	2.48311e-16	7.04712e-15	0.347072
NM_018180	chr10	125880292	125882292	promoters	0.307692	1	52	25	8.12861e-11	1.36385e-09	0.692308
NM_018180	chr10	125880543	125881292	exons_4	0.307692	1	52	25	8.12861e-11	1.36385e-09	0.692308
NM_001288973	chr10	126387477	126389477	promoters	0.333333	0	33	23	0.000241617	0.00205534	-0.333333
NM_001323356	chr10	127907310	128040874	introns_1	0.874214	0.570312	159	128	4.21356e-09	6.0466e-08	-0.303901
NM_006504	chr10	127982297	128040874	introns_1	1	0.406977	88	86	2.73832e-22	1.33871e-20	-0.593023
NM_001316677	chr10	127987396	128040874	introns_1	1	0.406977	88	86	2.73832e-22	1.33871e-20	-0.593023
NM_001323354	chr10	127997146	127999146	promoters	1	0.729167	42	48	1.92836e-05	0.000190143	-0.270833
NM_001323354	chr10	127998147	127999961	exons_1	1	0.729167	42	48	1.92836e-05	0.000190143	-0.270833
NM_001323354	chr10	127999962	128040874	introns_1	1	0	46	38	5.5693e-27	3.83596e-25	-1
NM_001005463	chr10	129962171	129962226	exons_5	1	0.578947	36	19	8.79026e-06	9.0239e-05	-0.421053
NM_001005463	chr10	129962227	129962941	introns_5	0.313846	0	325	193	1.22564e-25	7.87297e-24	-0.313846
NM_001323086	chr10	132147952	132148050	exons_3	1	0.521739	51	46	2.31336e-10	3.6798e-09	-0.478261
NM_000773	chr10	133526362	133528362	promoters	0.974359	0	78	34	2.24369e-28	1.67761e-26	-0.974359
NM_000773	chr10	133527363	133527572	exons_1	0.974359	0	78	34	2.24369e-28	1.67761e-26	-0.974359
NM_001276700	chr11	280084	281839	exons_3	0.686981	0.00621118	361	161	7.43786e-59	2.15164e-56	-0.680769
NM_001303029	chr11	398992	399196	exons_5	0.976562	0.759091	256	220	4.58558e-14	1.06176e-12	-0.217472
NM_001012302	chr11	421141	421198	exons_8	0.969231	0.0392157	65	51	6.96191e-29	5.37738e-27	-0.930015
NM_001329544	chr11	460289	473894	introns_2	0.26943	1	193	126	3.03142e-48	5.96976e-46	0.73057
NM_001329545	chr11	460289	479084	introns_1	0.26943	1	193	126	3.03142e-48	5.96976e-46	0.73057
NM_173573	chr11	555305	555503	exons_2	0.942857	0	35	14	8.82332e-12	1.65077e-10	-0.942857
NM_173573	chr11	559738	561738	promoters	0.288889	0	45	34	4.74888e-05	0.000448036	-0.288889
NM_001143994	chr11	559969	561969	promoters	0.288889	0	45	34	4.74888e-05	0.000448036	-0.288889
NM_001143993	chr11	561034	561761	introns_1	0.288889	0	45	34	4.74888e-05	0.000448036	-0.288889
NM_001143994	chr11	561478	561761	introns_1	0.288889	0	45	34	4.74888e-05	0.000448036	-0.288889
NM_001572	chr11	614950	616950	promoters	0.916168	0	167	84	4.78967e-54	1.1749e-51	-0.916168
NM_004031	chr11	615097	615647	exons_1	1	0	40	25	1.31764e-20	5.53249e-19	-1
NM_001572	chr11	615345	615647	exons_1	1	0	40	25	1.31764e-20	5.53249e-19	-1
NM_001572	chr11	615648	615912	introns_2	0.889764	0	127	59	6.70281e-37	7.94227e-35	-0.889764
NM_021924	chr11	617954	618111	exons_2	0.727273	1	33	22	0.00129564	0.00962233	0.272727
NM_022772	chr11	720062	720223	exons_4	1	0.193548	75	31	2.50946e-20	1.02594e-18	-0.806452
NM_001286606	chr11	831535	831986	exons_3	0.833333	0.131579	36	38	2.1379e-10	3.42015e-09	-0.701754
NM_173584	chr11	831535	831991	exons_1	0.833333	0.131579	36	38	2.1379e-10	3.42015e-09	-0.701754
NM_002457	chr11	1088258	1088497	exons_23	1	0.333333	39	12	7.10604e-08	9.06814e-07	-0.666667
NM_004420	chr11	1558112	1558271	exons_3	0.65625	0.961538	32	26	0.00207958	0.0147523	0.305288
NM_004420	chr11	1559056	1563850	introns_4	1	0.69697	52	33	4.38042e-06	4.63641e-05	-0.30303
NR_002196	chr11	1996875	1998875	promoters	0.2	0.923077	30	39	1.38103e-10	2.25931e-09	0.723077
NR_169304	chr11	2888636	2899395	introns_1	0.0540541	0.8125	37	16	1.42758e-08	1.92359e-07	0.758446
NR_169305	chr11	2888636	2902583	introns_1	0.0540541	0.8125	37	16	1.42758e-08	1.92359e-07	0.758446
NR_165430	chr11	3042257	3057342	introns_1	0.5	0	78	35	9.14484e-10	1.38081e-08	-0.5
NM_001014437	chr11	3048002	3057342	introns_1	0.5	0	78	35	9.14484e-10	1.38081e-08	-0.5
NM_001378136	chr11	3055040	3057342	introns_1	0.5	0	78	35	9.14484e-10	1.38081e-08	-0.5
NM_001014437	chr11	3056423	3058423	promoters	0.5	0	78	35	9.14484e-10	1.38081e-08	-0.5
NR_027138	chr11	3217331	3219331	promoters	0.952055	0.0747664	146	107	3.62321e-52	8.12722e-50	-0.877288
NM_001164377	chr11	3217813	3219813	promoters	0.952055	0.0747664	146	107	3.62321e-52	8.12722e-50	-0.877288
NM_001164377	chr11	3217944	3218813	exons_1	0.952055	0.0747664	146	107	3.62321e-52	8.12722e-50	-0.877288
NR_027138	chr11	3218332	3218559	exons_1	0.967742	0.103448	62	29	3.88931e-18	1.30722e-16	-0.864294
NR_027138	chr11	3218560	3221569	introns_1	0.940476	0.0641026	84	78	2.4631e-34	2.57649e-32	-0.876374
NM_020402	chr11	3669196	3669350	exons_3	0.160377	0.914286	106	70	2.00665e-25	1.27339e-23	0.753908
NM_001382580	chr11	3854737	4023872	introns_1	0.971698	0.69697	106	66	1.97646e-07	2.41282e-06	-0.274728
NM_001382569	chr11	3856410	4023872	introns_1	0.971698	0.69697	106	66	1.97646e-07	2.41282e-06	-0.274728
NR_168437	chr11	3967683	4023872	introns_2	0.954545	0.411765	66	34	9.73201e-10	1.46578e-08	-0.542781
NM_001005180	chr11	5735447	5737447	promoters	0.97619	0.722222	42	18	0.00399014	0.0260945	-0.253968
NM_001005180	chr11	5736448	5738523	exons_1	0.97619	0.722222	42	18	0.00399014	0.0260945	-0.253968
NM_001001913	chr11	5787816	5789816	promoters	0.982143	0.543478	56	46	9.65101e-09	1.33121e-07	-0.438665
NM_001001913	chr11	5787854	5788816	exons_1	0.982143	0.543478	56	46	9.65101e-09	1.33121e-07	-0.438665
NM_001005165	chr11	5883292	5885292	promoters	0.966102	0.510204	59	49	5.98245e-09	8.43212e-08	-0.455898
NM_001005165	chr11	5884293	5885231	exons_1	0.966102	0.510204	59	49	5.98245e-09	8.43212e-08	-0.455898
NM_001004052	chr11	6169326	6171326	promoters	0.433962	0.863636	53	22	0.000343376	0.00285382	0.429674
NM_001004052	chr11	6169355	6170326	exons_1	0.433962	0.863636	53	22	0.000343376	0.00285382	0.429674
NM_001037329	chr11	6240066	6240711	exons_4	0.311321	0.0166667	106	120	5.41101e-11	9.25654e-10	-0.294654
NM_001318029	chr11	6260080	6270087	introns_1	0.015625	0.306122	64	98	1.89093e-07	2.31245e-06	0.290497
NM_001363552	chr11	6269669	6269920	exons_1	0.015625	0.306122	64	98	1.89093e-07	2.31245e-06	0.290497
NM_001248007	chr11	6456297	6457029	exons_7	0.974249	0.034188	233	117	7.29739e-80	4.93704e-77	-0.940061
NM_144666	chr11	6570618	6571423	exons_33	0.666667	0.0571429	81	35	8.13693e-11	1.3647e-09	-0.609524
NR_027711	chr11	7848050	7850050	promoters	0.976744	0.631579	43	19	0.00028353	0.00238671	-0.345165
NR_027711	chr11	7849051	7849571	exons_1	0.976744	0.631579	43	19	0.00028353	0.00238671	-0.345165
NR_103765	chr11	10330710	10410756	introns_2	0.15	0.957447	40	47	1.95248e-16	5.60567e-15	0.807447
NM_032867	chr11	12287165	12292142	introns_1	0.924242	0.186047	66	43	3.38447e-16	9.54064e-15	-0.738196
NM_006108	chr11	14259280	14259450	exons_12	0.613333	0.15625	75	64	1.65975e-08	2.22427e-07	-0.457083
NM_006108	chr11	14259534	14259701	exons_13	0.641026	0.3	39	40	0.00215684	0.0152001	-0.341026
NR_169506	chr11	15567091	15585707	introns_2	1	0.708333	38	24	0.000123356	0.00110114	-0.291667
NR_169507	chr11	15624188	15704332	introns_1	0.961538	0.7	26	40	0.00430985	0.0279365	-0.261538
NR_169503	chr11	15644036	15704332	introns_1	0.961538	0.7	26	40	0.00430985	0.0279365	-0.261538
NM_001367872	chr11	16341253	16612080	introns_1	0.976744	0.614679	172	109	2.45501e-16	6.9721e-15	-0.362065
NM_033326	chr11	16341253	16476314	introns_1	0.976744	0.614679	172	109	2.45501e-16	6.9721e-15	-0.362065
NM_000525	chr11	17385249	17388659	exons_1	0.206349	0.843373	63	83	1.63897e-15	4.28874e-14	0.637024
NM_001166290	chr11	17385249	17387846	exons_1	0.40625	0.98	32	50	6.80993e-10	1.03986e-08	0.57375
NM_000525	chr11	17387659	17389659	promoters	0	0.221053	133	95	2.81194e-10	4.43753e-09	0.221053
NM_001166290	chr11	17387847	17389173	introns_1	0	0.221053	133	95	2.81194e-10	4.43753e-09	0.221053
NM_001377297	chr11	17387847	17388840	introns_1	0	0.636364	31	33	8.07437e-10	1.22713e-08	0.636364
NM_001377296	chr11	17388077	17388840	introns_1	0	0.636364	31	33	8.07437e-10	1.22713e-08	0.636364
NM_001351295	chr11	17432245	17442719	introns_4	1	0.681818	32	22	0.000170416	0.00148644	-0.318182
NM_001297764	chr11	17543416	17545416	promoters	0.928571	0	28	13	3.38202e-10	5.30525e-09	-0.928571
NM_173588	chr11	18722042	18724127	introns_13	0.94	0	50	43	6.60583e-25	4.08684e-23	-0.94
NM_024680	chr11	19234360	19234521	exons_8	0.953488	0.685714	43	35	0.00117087	0.00877687	-0.267774
NM_024680	chr11	19234744	19235058	exons_9	0.980263	0.157407	152	108	4.72483e-49	9.62076e-47	-0.822856
NM_001111018	chr11	19345312	19350372	introns_1	0.810811	0	37	12	5.46468e-08	7.00983e-07	-0.810811
NM_001111018	chr11	20068399	20077551	introns_3	0.987805	0.786885	82	61	2.66279e-05	0.000258311	-0.20092
NM_001111018	chr11	20107783	20114591	introns_11	0.945946	0.55	74	60	2.25556e-08	2.9912e-07	-0.395946
NM_201551	chr11	20783680	20783830	exons_2	1	0.3125	40	16	2.40885e-09	3.51939e-08	-0.6875
NM_201551	chr11	21229332	21229454	exons_11	1	0.344828	39	29	4.93399e-11	8.48897e-10	-0.655172
NM_001142649	chr11	22270312	22270442	exons_16	0.950704	0.46789	142	109	2.64713e-19	9.8524e-18	-0.482814
NM_001252010	chr11	24732189	24738220	introns_2	0.387097	0.971429	31	35	3.32576e-08	4.34994e-07	0.584332
NM_018362	chr11	27499359	27499568	exons_2	0.947368	0.310345	38	29	8.19239e-09	1.13524e-07	-0.637024
NM_170734	chr11	27658586	27699381	introns_1	0.933333	0.514706	90	68	6.08419e-10	9.35855e-09	-0.418627
NR_033313	chr11	27659229	27697477	introns_1	0.933333	0.514706	90	68	6.08419e-10	9.35855e-09	-0.418627
NR_033315	chr11	27677140	27697477	introns_1	0.95122	0.34	41	50	1.39076e-10	2.27258e-09	-0.61122
NR_033312	chr11	27691141	27697477	introns_1	0.95122	0.34	41	50	1.39076e-10	2.27258e-09	-0.61122
NM_001367979	chr11	30892818	30892997	exons_4	0.738095	0.978723	42	47	0.000426751	0.00347718	0.240628
NM_001368921	chr11	31800857	31801761	introns_1	0.909091	0.382979	33	47	5.67814e-07	6.61597e-06	-0.526112
NM_001368902	chr11	31801230	31801776	exons_1	0.870968	0.272727	62	88	4.60156e-14	1.06345e-12	-0.59824
NM_001368892	chr11	31801561	31801776	exons_1	0.870968	0.272727	62	88	4.60156e-14	1.06345e-12	-0.59824
NM_001368921	chr11	31801762	31801776	exons_1	0.827586	0.146341	29	41	3.63967e-09	5.25179e-08	-0.681245
NM_001145541	chr11	33072474	33073563	exons_1	0.111111	1	36	15	8.09581e-11	1.35944e-09	0.888889
NM_018393	chr11	33072474	33073549	exons_1	0.111111	1	36	15	8.09581e-11	1.35944e-09	0.888889
NM_012194	chr11	33598820	33598947	exons_13	0.944444	0.261905	36	42	6.97542e-11	1.17885e-09	-0.68254
NM_000611	chr11	33722464	33736381	introns_1	0.933333	0.333333	30	15	1.78951e-05	0.00017716	-0.6
NM_203331	chr11	33731469	33736381	introns_1	0.933333	0.333333	30	15	1.78951e-05	0.00017716	-0.6
NM_203330	chr11	33733611	33736381	introns_1	0.933333	0.333333	30	15	1.78951e-05	0.00017716	-0.6
NM_001422	chr11	34480315	34480771	introns_1	0.925	0.633333	40	30	0.00227147	0.0158825	-0.291667
NM_004171	chr11	35317517	35418949	introns_1	0.420561	0.212963	107	108	0.000984685	0.00749884	-0.207598
NM_001195728	chr11	35322680	35419935	introns_1	0.420561	0.212963	107	108	0.000984685	0.00749884	-0.207598
NM_001252652	chr11	35371097	35419907	introns_1	0.420561	0.212963	107	108	0.000984685	0.00749884	-0.207598
NM_000448	chr11	36573291	36579760	exons_2	0.136364	0.940299	66	67	1.13348e-23	6.32247e-22	0.803935
NM_020929	chr11	40319722	40648141	introns_1	1	0.325	51	40	8.49241e-15	2.0771e-13	-0.675
NM_001376525	chr11	43451266	43490238	introns_3	0.470588	1	34	36	1.02655e-08	1.41226e-07	0.529412
NR_164824	chr11	43451266	43467234	introns_1	0.470588	1	34	36	1.02655e-08	1.41226e-07	0.529412
NM_207122	chr11	44107683	44108248	exons_1	0.666667	0.961538	54	52	3.78937e-05	0.000361084	0.294872
NM_001258324	chr11	44938367	44950876	introns_1	0.782178	0.409091	101	66	9.35212e-07	1.0608e-05	-0.373087
NM_001318387	chr11	44938367	44950676	introns_1	0.782178	0.409091	101	66	9.35212e-07	1.0608e-05	-0.373087
NM_001318385	chr11	44939191	44950876	introns_1	0.782178	0.409091	101	66	9.35212e-07	1.0608e-05	-0.373087
NM_001318386	chr11	44939277	44950876	introns_1	0.782178	0.409091	101	66	9.35212e-07	1.0608e-05	-0.373087
NM_001258321	chr11	44939282	44950876	introns_1	0.782178	0.409091	101	66	9.35212e-07	1.0608e-05	-0.373087
NM_001258322	chr11	44941049	44950876	introns_1	0.782178	0.409091	101	66	9.35212e-07	1.0608e-05	-0.373087
NM_001258320	chr11	44941078	44949972	introns_1	0.782178	0.409091	101	66	9.35212e-07	1.0608e-05	-0.373087
NM_001258323	chr11	44941078	44950676	introns_1	0.782178	0.409091	101	66	9.35212e-07	1.0608e-05	-0.373087
NM_001384651	chr11	45180035	45182035	promoters	0.35	0	40	36	5.05201e-06	5.31773e-05	-0.35
NM_001384651	chr11	45181168	45181765	introns_1	0.35	0	40	36	5.05201e-06	5.31773e-05	-0.35
NR_122071	chr11	45370396	45372396	promoters	0.97561	0	41	28	3.8604e-20	1.53632e-18	-0.97561
NM_003654	chr11	45647689	45650965	exons_1	0.98374	0.021164	246	189	3.29654e-114	5.31833e-111	-0.962576
NM_052854	chr11	46278214	46299934	introns_1	1	0.705882	37	17	0.00036169	0.00299298	-0.294118
NM_001105540	chr11	46367400	46367651	introns_3	0.953846	0.478261	65	23	8.64989e-07	9.87556e-06	-0.475585
NM_201533	chr11	46367400	46367654	introns_1	0.953846	0.478261	65	23	8.64989e-07	9.87556e-06	-0.475585
NM_000506	chr11	46727996	46728163	exons_10	0.782051	1	78	29	0.000561441	0.0044628	0.217949
NR_106803	chr11	47178737	47180737	promoters	0.723164	0.949367	177	158	7.3307e-09	1.02056e-07	0.226203
NM_001184974	chr11	47180455	47180690	exons_2	0.671329	0.955224	143	134	2.1424e-10	3.42604e-09	0.283895
NM_001376663	chr11	47270247	47275898	introns_1	0.525424	0.927711	59	83	1.8915e-08	2.51875e-07	0.402287
NM_001376597	chr11	47274563	47275159	exons_2	0.525424	0.927711	59	83	1.8915e-08	2.51875e-07	0.402287
NM_001025596	chr11	47465937	47468891	exons_1	0.0588235	0.795455	34	44	3.99155e-12	7.72633e-11	0.736631
NM_001172639	chr11	47465937	47470889	exons_1	0.0588235	0.795455	34	44	3.99155e-12	7.72633e-11	0.736631
NM_001376411	chr11	47465937	47470555	exons_1	0.0588235	0.795455	34	44	3.99155e-12	7.72633e-11	0.736631
NM_001376427	chr11	47465937	47470551	exons_1	0.0588235	0.795455	34	44	3.99155e-12	7.72633e-11	0.736631
NM_001376435	chr11	47465937	47472102	exons_1	0.0588235	0.795455	34	44	3.99155e-12	7.72633e-11	0.736631
NM_001004701	chr11	55571127	55573127	promoters	0.847826	0.288889	46	45	2.64629e-08	3.48622e-07	-0.558937
NM_001004701	chr11	55572128	55573060	exons_1	0.847826	0.288889	46	45	2.64629e-08	3.48622e-07	-0.558937
NM_001005201	chr11	56121372	56123372	promoters	0.893333	0.153846	75	39	9.54256e-16	2.54626e-14	-0.739487
NM_001005201	chr11	56122373	56123311	exons_1	0.893333	0.153846	75	39	9.54256e-16	2.54626e-14	-0.739487
NM_005161	chr11	57233578	57237453	exons_1	0.0182927	0.945545	164	202	5.8562e-87	5.01314e-84	0.927252
NR_027991	chr11	57235792	57237250	exons_2	0.0182927	0.945545	164	202	5.8562e-87	5.01314e-84	0.927252
NR_027991	chr11	57236250	57238250	promoters	0.0182927	0.945545	164	202	5.8562e-87	5.01314e-84	0.927252
NM_005161	chr11	57236453	57238453	promoters	0.0182927	0.945545	164	202	5.8562e-87	5.01314e-84	0.927252
NM_000062	chr11	57596684	57598684	promoters	0.565217	0.047619	46	21	1.10663e-05	0.000112558	-0.517598
NM_001032295	chr11	57597210	57599210	promoters	0.565217	0.047619	46	21	1.10663e-05	0.000112558	-0.517598
NM_001085463	chr11	57762047	57794009	introns_1	0.62766	0.255814	94	86	3.76828e-07	4.46762e-06	-0.371846
NM_001085469	chr11	57762047	57795576	introns_1	0.62766	0.255814	94	86	3.76828e-07	4.46762e-06	-0.371846
NM_001206887	chr11	57762047	57791493	introns_1	0.62766	0.255814	94	86	3.76828e-07	4.46762e-06	-0.371846
NM_001206890	chr11	57762069	57794009	introns_1	0.62766	0.255814	94	86	3.76828e-07	4.46762e-06	-0.371846
NM_001085467	chr11	57762120	57794009	introns_1	0.62766	0.255814	94	86	3.76828e-07	4.46762e-06	-0.371846
NM_001206891	chr11	57789156	57791493	introns_1	0.62766	0.255814	94	86	3.76828e-07	4.46762e-06	-0.371846
NM_001085462	chr11	57791385	57791673	exons_1	0.62766	0.255814	94	86	3.76828e-07	4.46762e-06	-0.371846
NM_004778	chr11	60850933	60853731	exons_1	0.306569	0.0481928	137	83	6.79812e-07	7.8339e-06	-0.258377
NM_152718	chr11	61281786	61281914	exons_14	0.977778	0.027027	45	37	2.98632e-22	1.45656e-20	-0.950751
NM_152718	chr11	61294316	61296316	promoters	0.333333	0.0535714	108	56	1.28268e-05	0.000129304	-0.279762
NM_001351980	chr11	61333330	61334619	introns_1	0.972973	0.684211	37	38	0.00039041	0.00320535	-0.288762
NM_001351976	chr11	61333651	61334619	introns_1	0.972973	0.684211	37	38	0.00039041	0.00320535	-0.288762
NM_001300773	chr11	61533125	61547176	introns_1	0.469388	0.917722	147	158	7.21657e-19	2.57185e-17	0.448334
NM_001365809	chr11	61546031	61546255	exons_1	0.142857	0.967742	35	31	2.32454e-13	5.03124e-12	0.824885
NM_001365809	chr11	61546256	61547176	introns_1	0	0.857143	44	35	2.57071e-18	8.73127e-17	0.857143
NM_001300773	chr11	61547309	61551383	introns_1	0.975	0.513514	80	74	9.9442e-13	2.0397e-11	-0.461486
NM_001300773	chr11	61556208	61580789	introns_3	0.755556	0	45	19	5.70663e-10	8.79391e-09	-0.755556
NM_001363593	chr11	61962255	61965515	exons_1	0.976562	0.591837	128	49	9.00085e-11	1.50179e-09	-0.384726
NM_002032	chr11	61965369	61965515	exons_3	0.954545	0.4	66	30	1.90041e-09	2.78722e-08	-0.554545
NM_001367906	chr11	62575052	62576244	exons_1	0.98	0.125	50	48	5.32034e-21	2.30544e-19	-0.855
NM_004739	chr11	62600166	62600259	exons_16	0.972603	0.282051	73	39	6.00523e-16	1.63145e-14	-0.690551
NM_001300793	chr11	62603149	62603247	exons_1	0.831683	0.0769231	101	65	4.41468e-24	2.53669e-22	-0.75476
NR_037946	chr11	62707325	62715499	introns_1	0.931818	0.619048	44	42	0.000294391	0.00247218	-0.312771
NM_001079559	chr11	62712630	62715379	exons_1	0.931818	0.619048	44	42	0.000294391	0.00247218	-0.312771
NM_001039752	chr11	63288902	63290902	promoters	0.805556	0.178571	36	28	2.34097e-07	2.83717e-06	-0.626984
NM_001039752	chr11	63289903	63290567	exons_1	0.805556	0.178571	36	28	2.34097e-07	2.83717e-06	-0.626984
NR_134874	chr11	63290278	63290567	exons_2	0.805556	0.178571	36	28	2.34097e-07	2.83717e-06	-0.626984
NM_001290048	chr11	63631472	63633025	introns_2	0.607843	0.967742	51	31	5.82005e-05	0.000542386	0.359899
NM_004074	chr11	63976225	63976543	exons_2	0.980769	0.55814	52	43	7.72818e-08	9.84409e-07	-0.42263
NM_003377	chr11	64237420	64237655	exons_1	0.711712	0.931373	111	102	1.74379e-05	0.000173329	0.219661
NM_001243733	chr11	64237521	64237655	exons_1	0.711712	0.931373	111	102	1.74379e-05	0.000173329	0.219661
NM_001317090	chr11	64298110	64298249	exons_1	0	0.957831	158	166	4.95746e-87	4.62101e-84	0.957831
NR_031602	chr11	64367601	64369601	promoters	0.263158	0.025641	76	78	7.30936e-06	7.58156e-05	-0.237517
NM_001006944	chr11	64368704	64368797	exons_1	0.5	0	38	32	6.61183e-08	8.44262e-07	-0.5
NM_001376262	chr11	64630402	64630573	exons_2	0.951923	0	104	32	9.98181e-28	7.23138e-26	-0.951923
NM_001376262	chr11	64692847	64692876	exons_1	0.694444	0.952381	36	42	0.00166146	0.0120699	0.257937
NM_001376262	chr11	64697793	64712969	introns_3	0.921875	0	64	26	2.47759e-19	9.246e-18	-0.921875
NM_001098671	chr11	64742010	64742112	exons_1	0.692308	0	65	34	6.60502e-14	1.50983e-12	-0.692308
NM_001318398	chr11	64742033	64742793	introns_1	0.692308	0	65	34	6.60502e-14	1.50983e-12	-0.692308
NM_005609	chr11	64753519	64753682	exons_10	0.266667	1	30	16	7.67005e-08	9.77303e-07	0.733333
NM_130801	chr11	64803514	64804816	exons_1	0.883495	0.6	103	45	0.000139389	0.00123324	-0.283495
NM_001370259	chr11	64803522	64804816	exons_1	0.883495	0.6	103	45	0.000139389	0.00123324	-0.283495
NR_133639	chr11	64888458	64889340	exons_1	0.976744	0.129032	43	31	8.19559e-16	2.20367e-14	-0.847712
NR_037650	chr11	65034847	65034962	exons_3	0.264706	1	34	45	1.34007e-14	3.24167e-13	0.735294
NM_005468	chr11	65057553	65059553	promoters	0.0512821	0.882353	39	17	1.81169e-10	2.9217e-09	0.831071
NM_005468	chr11	65057875	65057996	exons_16	0.0512821	0.882353	39	17	1.81169e-10	2.9217e-09	0.831071
NM_013265	chr11	65109705	65109923	exons_3	1	0.765957	69	47	3.35722e-06	3.61082e-05	-0.234043
NM_013265	chr11	65110694	65110781	exons_5	0.9375	0	48	13	4.81684e-12	9.26822e-11	-0.9375
NM_145719	chr11	65355793	65357611	exons_2	0.977941	0	136	40	3.52366e-38	4.46536e-36	-0.977941
NR_002819	chr11	65497738	65506512	exons_1	0.937778	0.70283	225	212	3.16577e-11	5.60065e-10	-0.234948
NR_144567	chr11	65498969	65506512	exons_1	0.937778	0.70283	225	212	3.16577e-11	5.60065e-10	-0.234948
NR_145459	chr11	65499312	65507432	exons_1	0.937778	0.70283	225	212	3.16577e-11	5.60065e-10	-0.234948
NR_144568	chr11	65502637	65506512	exons_1	0.937778	0.70283	225	212	3.16577e-11	5.60065e-10	-0.234948
NM_001048218	chr11	65538442	65538704	exons_5	0.965517	0	29	13	2.21877e-11	3.99264e-10	-0.965517
NM_001164266	chr11	65548046	65551125	introns_12	0.939394	0.142857	33	35	1.36411e-12	2.76421e-11	-0.796537
NM_002419	chr11	65608268	65608448	exons_9	0.857143	0.297297	35	37	6.77373e-07	7.80793e-06	-0.559846
NM_001145138	chr11	65653601	65655000	exons_1	1	0.764706	32	17	0.00247607	0.0171134	-0.235294
NM_001243984	chr11	65653601	65654793	exons_1	1	0.764706	32	17	0.00247607	0.0171134	-0.235294
NM_001243985	chr11	65654510	65654818	introns_1	1	0.764706	32	17	0.00247607	0.0171134	-0.235294
NM_138368	chr11	65773898	65780342	exons_1	1	0.0789474	60	38	5.04061e-25	3.137e-23	-0.921053
NM_005507	chr11	65855654	65855730	exons_2	0.970588	0.655172	68	29	3.3703e-05	0.000322838	-0.315416
NR_037718	chr11	65867861	65868056	exons_1	0.969231	0.190476	65	42	1.07952e-18	3.76094e-17	-0.778755
NM_001135635	chr11	65916812	65918218	exons_1	0.882682	0.318841	179	138	2.09224e-26	1.39083e-24	-0.563841
NM_031450	chr11	65916812	65918215	exons_1	0.882682	0.318841	179	138	2.09224e-26	1.39083e-24	-0.563841
NM_001134774	chr11	66266873	66267861	exons_1	0.834356	0.254545	163	110	1.06176e-22	5.30827e-21	-0.57981
NM_001134776	chr11	66266873	66267860	exons_1	0.834356	0.254545	163	110	1.06176e-22	5.30827e-21	-0.57981
NM_001363559	chr11	66333919	66334224	exons_4	0.359375	0.988636	64	88	3.55228e-20	1.42861e-18	0.629261
NM_001363560	chr11	66334039	66334513	introns_1	0.359375	0.988636	64	88	3.55228e-20	1.42861e-18	0.629261
NM_001363559	chr11	66334514	66335251	exons_1	0.428571	0.942857	28	35	3.01524e-06	3.25469e-05	0.514286
NM_001243135	chr11	66465326	66467326	promoters	0.972973	0.0526316	37	19	1.39486e-13	3.09734e-12	-0.920341
NR_120586	chr11	66475105	66480038	introns_2	0.666667	1	33	47	2.65096e-06	2.88225e-05	0.333333
NM_001243135	chr11	66475598	66477337	exons_1	0.666667	1	33	47	2.65096e-06	2.88225e-05	0.333333
NM_003793	chr11	66567246	66567321	exons_10	0.969697	0.740741	33	27	0.0070689	0.0431416	-0.228956
NM_001302084	chr11	66759097	66788159	introns_1	0.969697	0	33	32	2.11203e-19	7.90993e-18	-0.969697
NM_000920	chr11	66853384	66863773	introns_11	0.807229	0.0841121	166	107	3.28463e-35	3.54182e-33	-0.723117
NM_024036	chr11	66857064	66859093	exons_1	0.807229	0.0841121	166	107	3.28463e-35	3.54182e-33	-0.723117
NM_001363524	chr11	66857735	66859093	exons_1	0.807229	0.0841121	166	107	3.28463e-35	3.54182e-33	-0.723117
NM_001008709	chr11	67400689	67400919	exons_5	0.6	0	40	39	4.99644e-11	8.58585e-10	-0.6
NM_001008709	chr11	67400858	67402858	promoters	0.6	0	40	39	4.99644e-11	8.58585e-10	-0.6
NM_004910	chr11	67494244	67494360	exons_6	0.990826	0.0275862	218	145	5.95824e-95	6.94234e-92	-0.963239
NM_016366	chr11	67520051	67520160	exons_3	0.978417	0.226891	139	119	1.00426e-41	1.54303e-39	-0.751527
NM_053056	chr11	69643247	69643831	introns_2	0.424658	0	73	33	8.9765e-08	1.13755e-06	-0.424658
NM_053056	chr11	69651118	69654474	exons_5	0.946237	0.688312	93	77	5.06734e-06	5.32985e-05	-0.257925
NR_110766	chr11	70473440	70490302	introns_1	0.971014	0.527027	69	74	5.3583e-11	9.1701e-10	-0.443987
NM_012309	chr11	70485314	70487720	exons_1	0.971014	0.527027	69	74	5.3583e-11	9.1701e-10	-0.443987
NR_110766	chr11	70660841	70662841	promoters	0.87931	0.0133333	58	75	6.0445e-29	4.69523e-27	-0.865977
NM_012309	chr11	70661596	70661678	exons_2	0.892857	0.0222222	28	45	3.65634e-16	1.02588e-14	-0.870635
NR_110766	chr11	70661596	70661841	exons_1	0.892857	0.0222222	28	45	3.65634e-16	1.02588e-14	-0.870635
NM_012309	chr11	70661679	70698687	introns_1	0.930435	0.609195	115	87	1.52769e-08	2.05386e-07	-0.321239
NM_001143839	chr11	72589907	72589981	exons_22	0.878788	0	33	13	1.75656e-09	2.58619e-08	-0.878788
NM_001143839	chr11	72590581	72591296	introns_24	0.83871	0	62	25	2.6907e-15	6.86105e-14	-0.83871
NM_001143839	chr11	72608752	72642253	introns_29	0.280374	0.493421	214	152	3.22392e-05	0.000309593	0.213047
NM_001146209	chr11	72642327	72668297	introns_1	0.916667	0.210526	48	38	2.86933e-12	5.66652e-11	-0.70614
NM_002599	chr11	72642327	72674136	introns_1	0.916667	0.210526	48	38	2.86933e-12	5.66652e-11	-0.70614
NM_001040118	chr11	72726620	72727172	exons_1	0.613793	0.97076	290	342	6.19819e-33	6.19022e-31	0.356967
NM_006645	chr11	72754729	72755142	exons_1	0.954545	0.079646	176	113	4.68207e-58	1.30062e-55	-0.874899
NM_001318766	chr11	72817856	72821547	introns_3	0.439024	0.05	41	20	0.000693614	0.00543008	-0.389024
NM_033388	chr11	72817856	72821667	introns_1	0.439024	0.05	41	20	0.000693614	0.00543008	-0.389024
NM_001277207	chr11	73272467	73296484	introns_1	0.56	0.918367	75	49	5.79117e-06	6.06381e-05	0.358367
NM_001277205	chr11	73295816	73296484	introns_1	0.114286	0.954545	35	22	1.83044e-11	3.32668e-10	0.84026
NM_021200	chr11	73660853	73661465	introns_3	0.846154	0	39	16	1.92229e-10	3.087e-09	-0.846154
NM_021200	chr11	73661466	73662819	exons_3	0.990826	0	109	61	5.86834e-48	1.13435e-45	-0.990826
NM_001381943	chr11	73981476	73981632	exons_2	0.935897	0.706897	78	58	0.000300276	0.00251757	-0.229001
NM_003356	chr11	74005730	74005933	exons_3	0.483871	0.975	31	40	3.66034e-07	4.35195e-06	0.491129
NM_001260506	chr11	75402304	75402446	exons_1	1	0.285714	30	35	2.25321e-11	4.0494e-10	-0.714286
NM_001260507	chr11	75402352	75402446	exons_1	1	0.285714	30	35	2.25321e-11	4.0494e-10	-0.714286
NM_001039548	chr11	75428627	75429748	introns_5	0.451895	0.0044843	343	223	2.4516e-41	3.67267e-39	-0.447411
NM_001300943	chr11	76513536	76516141	introns_5	0.975	0.709677	40	31	0.000902126	0.00693051	-0.265323
NM_001376304	chr11	77379389	77473551	introns_1	0.383333	0	60	70	1.20297e-10	1.98038e-09	-0.383333
NM_001376268	chr11	77392539	77473551	introns_1	0.383333	0	60	70	1.20297e-10	1.98038e-09	-0.383333
NM_001376277	chr11	77392542	77473408	introns_1	0.383333	0	60	70	1.20297e-10	1.98038e-09	-0.383333
NM_001376301	chr11	77392542	77473551	introns_1	0.383333	0	60	70	1.20297e-10	1.98038e-09	-0.383333
NM_001376281	chr11	77397094	77473551	introns_1	0.383333	0	60	70	1.20297e-10	1.98038e-09	-0.383333
NM_001376283	chr11	77397159	77473551	introns_1	0.383333	0	60	70	1.20297e-10	1.98038e-09	-0.383333
NM_001376276	chr11	77398581	77473551	introns_1	0.383333	0	60	70	1.20297e-10	1.98038e-09	-0.383333
NM_001376284	chr11	77424930	77473551	introns_1	0.71875	0	32	39	7.50249e-13	1.55946e-11	-0.71875
NM_001376282	chr11	77453913	77473551	introns_1	0.71875	0	32	39	7.50249e-13	1.55946e-11	-0.71875
NM_033547	chr11	77991300	77994589	introns_17	0.969697	0.5625	66	16	3.96102e-05	0.000376669	-0.407197
NM_001346415	chr11	83157632	83161326	introns_1	0.459459	0.0416667	74	96	1.68958e-11	3.08136e-10	-0.417793
NM_001351276	chr11	84534729	84720295	introns_1	0.307692	0.756757	26	37	0.000329387	0.00274191	0.449064
NM_001039618	chr11	85657991	85665129	exons_1	1	0.212121	30	33	7.92638e-13	1.64026e-11	-0.787879
NR_028024	chr11	85657991	85662457	exons_1	1	0.212121	30	33	7.92638e-13	1.64026e-11	-0.787879
NR_165404	chr11	85662363	85662457	exons_1	1	0.212121	30	33	7.92638e-13	1.64026e-11	-0.787879
NR_165399	chr11	85662389	85662457	exons_1	1	0.212121	30	33	7.92638e-13	1.64026e-11	-0.787879
NM_001286159	chr11	85855585	85865095	introns_1	0.6	1	30	18	0.000225767	0.00192912	0.4
NM_001206946	chr11	86031612	86068650	introns_1	0.653846	0	78	56	1.38059e-18	4.76235e-17	-0.653846
NM_001206947	chr11	86031612	86069719	introns_1	0.46789	0.00970874	109	103	6.73876e-18	2.2135e-16	-0.458181
NR_120593	chr11	86800652	86823376	introns_1	0.0612245	0.833333	49	42	1.82059e-15	4.7169e-14	0.772109
NM_007173	chr11	86807631	86811231	exons_1	0.0612245	0.833333	49	42	1.82059e-15	4.7169e-14	0.772109
NM_001293179	chr11	86807636	86811231	exons_1	0.0612245	0.833333	49	42	1.82059e-15	4.7169e-14	0.772109
NM_000842	chr11	88653168	88653403	exons_5	0.950413	0.747748	121	111	6.94125e-06	7.2158e-05	-0.202665
NM_001384268	chr11	89048073	89065775	introns_1	0.311111	0	45	45	2.72387e-06	2.95692e-05	-0.311111
NM_000842	chr11	89062659	89064659	promoters	0.311111	0	45	45	2.72387e-06	2.95692e-05	-0.311111
NM_000842	chr11	89063481	89063659	exons_1	0.311111	0	45	45	2.72387e-06	2.95692e-05	-0.311111
NM_001330345	chr11	94377316	94380773	exons_1	1	0.615385	59	39	1.6108e-08	2.16213e-07	-0.384615
NM_018039	chr11	94997024	94999519	exons_3	0.0582524	0.944444	103	108	1.80919e-45	3.22929e-43	0.886192
NM_004621	chr11	101504799	101583333	introns_12	1	0.344828	39	29	4.93399e-11	8.48897e-10	-0.655172
NM_003063	chr11	107711056	107713056	promoters	0.933333	0.657143	45	35	0.00143145	0.0105192	-0.27619
NM_001363503	chr11	108490970	108491167	exons_4	0.755556	0.966667	45	30	0.0075873	0.045799	0.211111
NM_033390	chr11	110164341	110171841	exons_6	0.457143	0	35	32	4.66664e-07	5.48772e-06	-0.457143
NR_169244	chr11	111293389	111298666	exons_1	0.395349	0.0740741	86	54	8.75542e-06	8.99033e-05	-0.321275
NM_001271458	chr11	111297545	111299545	promoters	0.395349	0.0740741	86	54	8.75542e-06	8.99033e-05	-0.321275
NM_001271457	chr11	111297839	111299839	promoters	0.395349	0.0740741	86	54	8.75542e-06	8.99033e-05	-0.321275
NR_169243	chr11	111298209	111300209	promoters	0.395349	0.0740741	86	54	8.75542e-06	8.99033e-05	-0.321275
NM_001136105	chr11	111298250	111300250	promoters	0.395349	0.0740741	86	54	8.75542e-06	8.99033e-05	-0.321275
NM_001370484	chr11	111298308	111300308	promoters	0.395349	0.0740741	86	54	8.75542e-06	8.99033e-05	-0.321275
NM_006235	chr11	111352256	111354575	exons_1	0.5625	0.978261	32	46	1.72922e-06	1.90778e-05	0.415761
NM_001367974	chr11	111498803	111514666	introns_1	0.981132	0.583333	53	12	0.000203598	0.00175075	-0.397799
NM_017589	chr11	111498803	111512180	introns_1	0.981132	0.583333	53	12	0.000203598	0.00175075	-0.397799
NM_181700	chr11	111761052	111766247	introns_1	0.289474	0	38	29	0.000172602	0.00150457	-0.289474
NM_181699	chr11	111765294	111765384	exons_2	0.289474	0	38	29	0.000172602	0.00150457	-0.289474
NM_001256400	chr11	112217761	112218933	exons_2	0.540541	0.966667	37	30	2.0321e-05	0.000199996	0.426126
NM_031938	chr11	112217761	112218946	exons_1	0.540541	0.966667	37	30	2.0321e-05	0.000199996	0.426126
NM_000795	chr11	113424683	113475075	introns_5	0.3125	0.933333	32	45	2.85598e-09	4.15097e-08	0.620833
NM_001018011	chr11	114156435	114186951	introns_3	0.371795	0.93617	78	47	2.56514e-11	4.58447e-10	0.564375
NR_120567	chr11	114364168	114378739	introns_1	0	0.98	33	50	4.243e-24	2.44474e-22	0.98
NM_019021	chr11	114391666	114399988	introns_1	0.941176	0.633333	51	30	0.000445823	0.00361432	-0.307843
NM_017678	chr11	114570591	114571473	exons_1	1	0.72093	43	43	1.6206e-05	0.000161414	-0.27907
NM_003904	chr11	116787023	116789023	promoters	0.506494	0.0350877	77	57	1.53452e-10	2.49581e-09	-0.471406
NM_001317086	chr11	116787060	116787819	introns_1	0.506494	0.0350877	77	57	1.53452e-10	2.49581e-09	-0.471406
NM_003904	chr11	116787060	116787481	introns_1	0.506494	0.0350877	77	57	1.53452e-10	2.49581e-09	-0.471406
NM_004588	chr11	118175639	118177639	promoters	0	0.526316	54	38	3.70076e-11	6.46432e-10	0.526316
NM_004588	chr11	118176362	118176639	exons_4	0	0.526316	54	38	3.70076e-11	6.46432e-10	0.526316
NR_046370	chr11	118381508	118417340	introns_1	0.772414	0.57	145	100	0.000801927	0.00621193	-0.202414
NR_046369	chr11	118381561	118417340	introns_1	0.772414	0.57	145	100	0.000801927	0.00621193	-0.202414
NM_005933	chr11	118471662	118474315	exons_3	0.95	0.097561	60	41	2.22411e-20	9.14634e-19	-0.852439
NM_001716	chr11	118883993	118893595	introns_1	0.37037	0.971429	27	35	4.2618e-08	5.51235e-07	0.601058
NM_032966	chr11	118892391	118894391	promoters	0.37037	0.971429	27	35	4.2618e-08	5.51235e-07	0.601058
NM_001028	chr11	119017343	119019343	promoters	0.979167	0.047619	48	42	3.68441e-23	1.94154e-21	-0.931548
NM_001028	chr11	119017362	119017545	exons_3	0.979167	0.047619	48	42	3.68441e-23	1.94154e-21	-0.931548
NM_001382612	chr11	119116025	119118544	exons_1	0.971429	0.12	35	25	4.40761e-13	9.32334e-12	-0.851429
NM_001290474	chr11	119116045	119118544	exons_1	0.971429	0.12	35	25	4.40761e-13	9.32334e-12	-0.851429
NM_001278431	chr11	119339883	119341883	promoters	1	0.794118	31	34	0.00170606	0.0123725	-0.205882
NM_015645	chr11	119340695	119341772	exons_1	1	0.794118	31	34	0.00170606	0.0123725	-0.205882
NM_004205	chr11	119355215	119356922	exons_1	0.739837	0	123	83	1.0972e-32	1.08802e-30	-0.739837
NM_004205	chr11	119357483	119357590	exons_3	1	0.647059	42	17	4.32553e-05	0.000410216	-0.352941
NM_001243759	chr11	119360235	119381472	introns_1	0.822222	0.563758	180	149	2.75399e-07	3.31474e-06	-0.258464
NM_004205	chr11	119360235	119372706	introns_1	0.597403	0.328125	77	64	0.00132158	0.00978378	-0.269278
NM_004205	chr11	119373522	119381472	introns_1	1	0	28	16	3.08047e-14	7.25919e-13	-1
NM_203285	chr11	119640013	119675158	introns_3	0.349057	0.59736	424	303	2.88352e-11	5.13162e-10	0.248303
NM_002855	chr11	119660993	119665297	exons_1	0.252033	0.548507	369	268	2.21776e-14	5.27358e-13	0.296475
NM_001282470	chr11	120985904	120988804	exons_1	1	0.3125	25	16	1.33652e-07	1.6606e-06	-0.6875
NM_014619	chr11	120985904	120988906	exons_1	1	0.3125	25	16	1.33652e-07	1.6606e-06	-0.6875
NM_005422	chr11	121125873	121127751	introns_8	0.972973	0.0126582	74	79	1.2678e-41	1.94085e-39	-0.960315
NM_005422	chr11	121127752	121128344	exons_9	0.96875	0.0185185	96	54	5.18079e-37	6.17368e-35	-0.950231
NM_003105	chr11	121590040	121590174	exons_27	1	0.6	39	20	8.11036e-06	8.36688e-05	-0.4
NM_003105	chr11	121625278	121627554	introns_43	0.457143	0.903226	35	31	6.18565e-05	0.00057378	0.446083
NR_137193	chr11	122180399	122292283	introns_1	0.268041	0.900901	97	111	2.48772e-22	1.22047e-20	0.63286
NR_001453	chr11	123058422	123060422	promoters	1	0.694915	68	59	2.48482e-08	3.28589e-07	-0.305085
NM_153201	chr11	123060116	123060268	exons_2	1	0.413793	32	29	9.94218e-09	1.37002e-07	-0.586207
NM_001004474	chr11	123976691	123978691	promoters	0.0204082	0.361702	49	47	3.76872e-06	4.02554e-05	0.341294
NM_001004474	chr11	123976696	123977691	exons_1	0.0204082	0.361702	49	47	3.76872e-06	4.02554e-05	0.341294
NM_001004464	chr11	124029596	124030634	exons_2	0.125	1	32	22	1.09137e-12	2.22876e-11	0.875
NM_001301088	chr11	124886464	124886822	exons_3	0.245902	0.927536	61	69	5.31913e-17	1.60169e-15	0.681635
NM_001301088	chr11	124891666	124891802	exons_8	0.151515	0.962963	33	27	9.23157e-12	1.72484e-10	0.811448
NM_152722	chr11	124924728	124925069	exons_5	0.233333	0.947368	30	38	1.38901e-10	2.27148e-09	0.714035
NM_001382335	chr11	125164777	125331818	introns_1	0.181818	0.453659	187	205	5.4157e-09	7.66938e-08	0.27184
NR_168077	chr11	125164777	125351283	introns_1	0.181818	0.453659	187	205	5.4157e-09	7.66938e-08	0.27184
NM_001382325	chr11	125235116	125351283	introns_1	0.119403	0.659091	67	88	1.9699e-12	3.94601e-11	0.539688
NM_001382329	chr11	125235116	125367845	introns_1	0.119403	0.659091	67	88	1.9699e-12	3.94601e-11	0.539688
NR_168083	chr11	125235116	125331818	introns_1	0.119403	0.659091	67	88	1.9699e-12	3.94601e-11	0.539688
NM_001382328	chr11	125239729	125331818	introns_1	0.119403	0.659091	67	88	1.9699e-12	3.94601e-11	0.539688
NM_013264	chr11	125903507	125905507	promoters	0.28	0.0333333	50	30	0.00248936	0.0171996	-0.246667
NM_001330438	chr11	125905279	125905552	introns_1	0.28	0.0333333	50	30	0.00248936	0.0171996	-0.246667
NM_001143820	chr11	128490577	128556290	introns_4	0.972973	0.352941	37	17	3.5233e-07	4.19614e-06	-0.620032
NR_135072	chr11	128682460	128686226	introns_1	0.722222	0.115385	108	78	9.26006e-18	2.98786e-16	-0.606838
NR_120582	chr11	129612121	129612446	exons_1	0.774194	1	31	39	0.000430777	0.00350725	0.225806
NM_001367893	chr11	129944771	129945012	exons_7	0.969925	0.0234375	133	128	1.19723e-66	4.60724e-64	-0.946487
NM_001367892	chr11	129945013	129947210	introns_1	1	0.135135	31	37	8.60656e-16	2.3053e-14	-0.864865
NM_001367893	chr11	129945013	129947144	introns_1	1	0.135135	31	37	8.60656e-16	2.3053e-14	-0.864865
NM_021978	chr11	130208410	130208684	exons_17	0.967391	0.0277778	92	72	3.48748e-41	5.09706e-39	-0.939614
NM_001352007	chr11	131661049	131911563	introns_1	0.330935	0.910714	139	112	1.16901e-22	5.83058e-21	0.579779
NM_001319104	chr11	132657320	133532263	introns_1	0.926471	0.489749	612	439	1.00593e-59	3.05758e-57	-0.436721
NM_001012393	chr11	132657320	132942925	introns_1	0.935829	0.641026	187	195	2.45001e-13	5.28643e-12	-0.294803
NM_001012393	chr11	132943011	133532263	introns_1	0.922353	0.368852	425	244	5.16188e-54	1.25884e-51	-0.5535
NM_001205329	chr11	134145946	134146045	exons_2	0.954545	0.472727	88	55	1.26224e-11	2.32729e-10	-0.481818
NM_001372065	chr11	134153364	134157017	introns_1	1	0.5	40	14	2.39915e-06	2.61593e-05	-0.5
NR_033852	chr11	134436785	134466339	introns_1	1	0.647059	24	34	0.000108098	0.000970312	-0.352941
NR_033852	chr11	134482731	134504797	introns_5	1	0.190476	52	42	1.27754e-19	4.9028e-18	-0.809524
NM_173593	chr12	460546	535165	introns_1	0.945946	0.439024	111	41	1.73468e-11	3.15774e-10	-0.506922
NM_173593	chr12	546714	548023	introns_7	0.970149	0.432432	67	37	1.3065e-10	2.14407e-09	-0.537717
NM_001294346	chr12	566179	643510	introns_1	1	0.638298	63	47	8.31444e-09	1.15102e-07	-0.361702
NM_001367996	chr12	566179	641359	introns_1	1	0.638298	63	47	8.31444e-09	1.15102e-07	-0.361702
NM_016533	chr12	566179	663327	introns_1	1	0.638298	63	47	8.31444e-09	1.15102e-07	-0.361702
NR_122124	chr12	641025	643958	introns_4	1	0.238095	30	21	2.07335e-10	3.32068e-09	-0.761905
NM_001297422	chr12	916206	916535	exons_1	1	0	36	18	1.12138e-16	3.28245e-15	-1
NM_001297419	chr12	916484	916638	introns_1	1	0	36	18	1.12138e-16	3.28245e-15	-1
NM_152441	chr12	1566811	1592872	introns_1	1	0.428571	37	21	3.41441e-08	4.45893e-07	-0.571429
NM_172364	chr12	1907875	1908037	exons_22	1	0	50	42	2.01112e-29	1.60683e-27	-1
NR_146317	chr12	2796947	2812561	introns_1	1	0.569231	72	65	1.61907e-12	3.25881e-11	-0.430769
NM_002014	chr12	2797283	2797728	introns_1	1	0.333333	31	39	6.34376e-11	1.07644e-09	-0.666667
NM_020996	chr12	4444614	4446614	promoters	0.133333	0.518519	30	27	0.00144828	0.010628	0.385185
NM_002527	chr12	5493131	5495131	promoters	0.378472	0.0747126	288	174	1.67573e-14	4.02347e-13	-0.30376
NM_002527	chr12	5494132	5495299	exons_1	0.378472	0.0747126	288	174	1.67573e-14	4.02347e-13	-0.30376
NM_001102654	chr12	5494194	5495299	exons_1	0.378472	0.0747126	288	174	1.67573e-14	4.02347e-13	-0.30376
NM_001278597	chr12	5578519	5599483	introns_5	1	0.703704	36	27	9.97297e-05	0.000898081	-0.296296
NM_001278597	chr12	5921367	5922619	introns_2	0.96	0.73913	50	46	0.00143509	0.0105386	-0.22087
NM_000552	chr12	5953595	5967485	introns_5	1	0.645161	65	31	1.19683e-07	1.49455e-06	-0.354839
NM_002342	chr12	6383161	6385161	promoters	0.515152	0.0555556	33	18	0.000350009	0.0029032	-0.459596
NM_001270987	chr12	6384588	6384684	exons_1	0.515152	0.0555556	33	18	0.000350009	0.0029032	-0.459596
NR_015382	chr12	6450341	6451517	exons_1	1	0	30	29	1.5254e-19	5.78522e-18	-1
NR_015382	chr12	6450517	6452517	promoters	1	0	30	29	1.5254e-19	5.78522e-18	-1
NR_147126	chr12	6450673	6452673	promoters	1	0	30	29	1.5254e-19	5.78522e-18	-1
NM_018009	chr12	6451041	6453041	promoters	1	0	30	29	1.5254e-19	5.78522e-18	-1
NM_001242	chr12	6451268	6451713	exons_3	1	0	30	29	1.5254e-19	5.78522e-18	-1
NM_016497	chr12	6491886	6492467	exons_1	0.880282	0.0123457	142	81	2.42611e-43	3.92918e-41	-0.867936
NM_016497	chr12	6492262	6494262	promoters	0.880282	0.0123457	142	81	2.42611e-43	3.92918e-41	-0.867936
NM_001357943	chr12	6536494	6536593	exons_1	0.968254	0.702703	63	37	0.000139539	0.00123405	-0.265551
NM_001244015	chr12	6698105	6700134	introns_1	0.03125	0.773585	64	53	5.11437e-19	1.86222e-17	0.742335
NM_000616	chr12	6817331	6818420	introns_2	0.849057	0.461538	53	26	0.000387995	0.00318739	-0.387518
NM_019858	chr12	6820820	6822820	promoters	0	1	33	40	1.16781e-23	6.5053e-22	1
NM_001354346	chr12	7090893	7092893	promoters	0.651163	0.27027	43	37	0.000560081	0.00445283	-0.380893
NM_001733	chr12	7091445	7093445	promoters	0.651163	0.27027	43	37	0.000560081	0.00445283	-0.380893
NM_001297712	chr12	8648204	8654436	introns_1	0.0102041	0.873684	98	95	2.82107e-41	4.16664e-39	0.86348
NM_001297711	chr12	8650590	8655414	introns_2	0.0102041	0.873684	98	95	2.82107e-41	4.16664e-39	0.86348
NR_123734	chr12	8650590	8654436	introns_1	0.0102041	0.873684	98	95	2.82107e-41	4.16664e-39	0.86348
NM_003480	chr12	8651692	8654436	introns_1	0.0102041	0.873684	98	95	2.82107e-41	4.16664e-39	0.86348
NR_147945	chr12	8681819	8713810	introns_1	0.0232558	0.454545	43	22	1.12234e-05	0.0001141	0.43129
NM_001384894	chr12	10186590	10189895	introns_2	0.116279	0.875	43	16	2.35001e-08	3.11252e-07	0.758721
NM_007360	chr12	10379700	10379792	exons_4	0.915254	0.34375	59	32	7.28629e-09	1.01471e-07	-0.571504
NR_120430	chr12	10379702	10379836	exons_1	0.915254	0.34375	59	32	7.28629e-09	1.01471e-07	-0.571504
NM_001987	chr12	11869970	11884444	introns_5	1	0.772727	38	22	0.000994336	0.00756448	-0.227273
NM_006143	chr12	12660890	12662470	exons_1	0.0645161	0.918919	31	37	2.16363e-14	5.15072e-13	0.854403
NM_006143	chr12	12684508	12695458	introns_2	0.933333	0.642857	30	28	0.0048235	0.0308096	-0.290476
NM_016355	chr12	12812345	12814345	promoters	0.392157	0.0434783	102	69	1.92781e-08	2.56548e-07	-0.348679
NM_003979	chr12	12908243	12909171	exons_2	0	0.972222	44	36	1.17725e-23	6.54919e-22	0.972222
NM_000834	chr12	13675860	13753316	introns_10	1	0.714286	43	42	1.34103e-05	0.000134991	-0.285714
NM_000834	chr12	13753317	13753915	exons_11	0.54023	0.988095	87	84	3.40808e-14	7.9908e-13	0.447865
NM_000834	chr12	13753916	13865797	introns_11	0.558824	0.952941	136	85	6.81202e-12	1.28826e-10	0.394118
NM_000834	chr12	13865798	13866226	exons_12	0	0.886179	113	123	7.9374e-54	1.91346e-51	0.886179
NM_000834	chr12	13979928	13980356	exons_13	0.302326	0.0833333	129	84	6.43874e-05	0.000596465	-0.218992
NM_000900	chr12	14880864	14882280	exons_1	0.991736	0.754237	121	118	9.63414e-10	1.45156e-08	-0.237498
NM_032918	chr12	15121120	15217428	introns_2	0.710843	0.95082	83	61	9.5318e-05	0.000862985	0.239976
NM_007178	chr12	15883541	15883676	exons_2	0.837838	0.0571429	37	35	8.42415e-13	1.73812e-11	-0.780695
NM_001001395	chr12	16560539	16600654	introns_2	1	0.216495	113	97	1.24743e-39	1.69336e-37	-0.783505
NM_001243613	chr12	16560539	16594136	introns_1	1	0.216495	113	97	1.24743e-39	1.69336e-37	-0.783505
NR_045014	chr12	16560539	16600713	introns_1	1	0.216495	113	97	1.24743e-39	1.69336e-37	-0.783505
NM_002907	chr12	21471428	21471647	exons_3	0.941176	0.619048	34	21	0.0026525	0.0182068	-0.322129
NM_021957	chr12	21558200	21558313	exons_6	0.703704	0.0333333	54	30	1.10841e-10	1.83406e-09	-0.67037
NM_001261414	chr12	23536670	23543210	introns_2	0.885714	0.0588235	35	17	1.30238e-09	1.93032e-08	-0.826891
NM_001261415	chr12	23896025	23950868	introns_1	0.902439	0	41	32	4.7764e-18	1.58883e-16	-0.902439
NM_006940	chr12	23896025	23949563	introns_1	0.902439	0	41	32	4.7764e-18	1.58883e-16	-0.902439
NM_006940	chr12	23948670	23950670	promoters	0.902439	0	41	32	4.7764e-18	1.58883e-16	-0.902439
NM_001164748	chr12	25959149	26055235	introns_1	0.970588	0.689655	34	29	0.0014155	0.0104239	-0.280933
NM_007211	chr12	25959149	25995036	introns_1	0.970588	0.689655	34	29	0.0014155	0.0104239	-0.280933
NM_001164747	chr12	25973888	25995036	introns_1	0.970588	0.689655	34	29	0.0014155	0.0104239	-0.280933
NM_002223	chr12	26632060	26653975	introns_36	1	0.714286	35	21	0.000310055	0.00259385	-0.285714
NR_146469	chr12	31368301	31370301	promoters	1	0.0689655	51	29	7.45457e-21	3.19397e-19	-0.931034
NM_001366891	chr12	31460382	31480119	introns_1	0.55814	0.9	43	20	0.00426001	0.0276527	0.34186
NR_146526	chr12	40155238	40157238	promoters	0.186047	1	43	21	7.69571e-12	1.44755e-10	0.813953
NR_146526	chr12	40156344	40167247	introns_1	0.186047	1	43	21	7.69571e-12	1.44755e-10	0.813953
NM_173600	chr12	40392393	40394393	promoters	0.954545	0.695652	44	23	0.00390305	0.0255903	-0.258893
NM_173600	chr12	40446630	40447324	introns_38	0.3125	0.705882	48	17	0.00463352	0.029691	0.393382
NM_013377	chr12	41567900	41572363	introns_7	0.0333333	1	30	16	6.03996e-13	1.26297e-11	0.966667
NM_025003	chr12	43353866	43354298	exons_1	0.0285714	1	35	16	7.85118e-14	1.784e-12	0.971429
NM_025003	chr12	43383978	43399065	introns_10	1	0.4375	32	16	7.83747e-07	8.98226e-06	-0.5625
NM_001286213	chr12	43844929	44143524	introns_1	0.572464	0.914062	276	128	1.74706e-13	3.81678e-12	0.341599
NM_001286212	chr12	43944210	43944342	exons_1	0.150376	0.941176	133	51	4.50318e-25	2.81506e-23	0.790801
NM_001025356	chr12	45401795	45402020	exons_12	0.326531	0.928571	49	42	5.10787e-10	7.91185e-09	0.602041
NR_125380	chr12	46383696	46387746	introns_1	0.936	0.28	125	75	2.23841e-23	1.20685e-21	-0.656
NR_125377	chr12	46383714	46387746	introns_1	0.936	0.28	125	75	2.23841e-23	1.20685e-21	-0.656
NR_125381	chr12	46384162	46387746	introns_1	0.936	0.28	125	75	2.23841e-23	1.20685e-21	-0.656
NM_181847	chr12	47075707	47079065	exons_1	0.958824	0.0701754	170	114	1.09687e-59	3.26308e-57	-0.888648
NM_001370299	chr12	47076449	47079065	exons_1	0.958824	0.0701754	170	114	1.09687e-59	3.26308e-57	-0.888648
NM_001143668	chr12	47076600	47079065	exons_1	0.958824	0.0701754	170	114	1.09687e-59	3.26308e-57	-0.888648
NM_017842	chr12	47773441	47779027	introns_1	0.766667	0.974359	30	39	0.00580006	0.0362469	0.207692
NM_001844	chr12	47995875	47995919	exons_46	0.181818	1	33	16	1.85139e-09	2.71819e-08	0.818182
NM_004818	chr12	48851163	48853163	promoters	0.701754	0	57	33	1.82488e-13	3.98058e-12	-0.701754
NM_001286957	chr12	48918685	48918903	exons_5	0	0.923077	28	52	4.87583e-19	1.77999e-17	0.923077
NM_012284	chr12	49544383	49548894	introns_6	1	0	38	14	7.06771e-15	1.74595e-13	-1
NM_032130	chr12	49603185	49603367	exons_5	0.230769	1	26	20	3.48137e-09	5.02857e-08	0.769231
NM_001368048	chr12	49794765	49797394	exons_6	0.466667	1	30	39	7.99011e-09	1.10904e-07	0.533333
NM_020039	chr12	50081365	50081544	introns_3	0.806723	0.0357143	119	56	7.46675e-25	4.58566e-23	-0.771008
NM_001256830	chr12	50081545	50083622	exons_1	0.875776	0.0555556	161	126	2.35093e-50	4.88179e-48	-0.820221
NM_020039	chr12	50081545	50083611	exons_1	0.875776	0.0555556	161	126	2.35093e-50	4.88179e-48	-0.820221
NM_182559	chr12	50841925	50843925	promoters	0.947368	0.0444444	38	45	1.09095e-19	4.21373e-18	-0.902924
NM_001258401	chr12	51391489	51440707	introns_1	0.517647	0.96	85	50	4.42234e-09	6.33753e-08	0.442353
NM_001177984	chr12	51806282	51812864	exons_6	0.259259	0.913043	54	23	2.99477e-08	3.93173e-07	0.653784
NM_001320198	chr12	52275947	52301912	introns_2	0.925926	0.4875	81	80	1.67334e-10	2.70691e-09	-0.438426
NM_001320198	chr12	52301913	52302285	exons_1	0.931507	0	73	40	6.18624e-27	4.2539e-25	-0.931507
NM_002282	chr12	52320398	52322398	promoters	1	0	30	46	5.65224e-24	3.2039e-22	-1
NM_002282	chr12	52320952	52321398	exons_9	1	0	30	46	5.65224e-24	3.2039e-22	-1
NM_033033	chr12	52405335	52407335	promoters	0.617647	0.967213	68	61	2.14102e-07	2.60386e-06	0.349566
NM_033033	chr12	52405867	52406335	exons_9	0.617647	0.967213	68	61	2.14102e-07	2.60386e-06	0.349566
NM_004693	chr12	52433371	52435371	promoters	0.135135	0.5	37	26	0.00153855	0.0112334	0.364865
NM_175068	chr12	52617559	52619559	promoters	0.103448	1	29	21	1.58178e-12	3.18682e-11	0.896552
NM_175068	chr12	52618078	52618559	exons_5	0.103448	1	29	21	1.58178e-12	3.18682e-11	0.896552
NM_001173467	chr12	53326576	53329420	exons_1	0.939394	0.175	33	40	2.70956e-12	5.36615e-11	-0.764394
NM_018457	chr12	53443774	53446014	introns_1	0.157895	1	38	17	1.1094e-10	1.83496e-09	0.842105
NM_001366559	chr12	53524564	53524761	exons_2	1	0.661871	114	139	7.35629e-16	1.98308e-14	-0.338129
NM_017409	chr12	53986011	53989168	introns_1	0.236181	0.032967	199	91	1.90682e-06	2.09381e-05	-0.203214
NM_006897	chr12	54002430	54003336	exons_2	0.05	0.789773	120	176	2.2131e-41	3.33924e-39	0.739773
NM_153693	chr12	54017415	54028575	introns_1	0	0.659091	131	132	1.1867e-37	1.46836e-35	0.659091
NR_003084	chr12	54017415	54034277	introns_1	0.00455581	0.208134	439	418	1.41301e-27	1.0149e-25	0.203578
NM_014620	chr12	54054850	54056030	exons_2	0.605263	0.92	76	50	3.54647e-05	0.000338939	0.314737
NR_026655	chr12	54058565	54118603	introns_1	0.301471	0.521368	136	117	0.000364327	0.0030071	0.219897
NM_001261461	chr12	54292107	54293381	exons_1	0.368	0.0165289	125	121	2.6398e-14	6.24176e-13	-0.351471
NM_001136023	chr12	54292111	54293381	exons_1	0.368	0.0165289	125	121	2.6398e-14	6.24176e-13	-0.351471
NM_001315535	chr12	54567088	54570240	introns_1	0.987179	0.716981	78	53	1.32193e-06	1.46956e-05	-0.270198
NM_001288768	chr12	54569122	54569366	exons_1	0.987179	0.716981	78	53	1.32193e-06	1.46956e-05	-0.270198
NM_000924	chr12	54569184	54569366	exons_1	0.987179	0.716981	78	53	1.32193e-06	1.46956e-05	-0.270198
NM_001315534	chr12	54569281	54569366	exons_1	0.987179	0.716981	78	53	1.32193e-06	1.46956e-05	-0.270198
NM_001351151	chr12	54972732	54974732	promoters	0.553846	0.95	130	120	2.53681e-14	6.00842e-13	0.396154
NR_147062	chr12	54974400	54974607	exons_1	0.553846	0.95	130	120	2.53681e-14	6.00842e-13	0.396154
NM_152637	chr12	55680735	55682735	promoters	0.902655	0.656716	113	67	5.91419e-05	0.000550425	-0.245938
NM_152637	chr12	55682253	55683812	introns_1	0.935484	0.608696	62	23	0.000460273	0.00371996	-0.326788
NR_037655	chr12	55716197	55719090	introns_1	0.928571	0.578947	28	19	0.00379272	0.0249434	-0.349624
NR_037657	chr12	55716718	55719090	introns_1	0.928571	0.578947	28	19	0.00379272	0.0249434	-0.349624
NR_037658	chr12	55717006	55719090	introns_1	0.928571	0.578947	28	19	0.00379272	0.0249434	-0.349624
NM_001272101	chr12	55841106	55841236	exons_2	0.660194	0.986486	103	74	1.80644e-09	2.6559e-08	0.326292
NR_073606	chr12	55841106	55841207	exons_1	0.660194	0.986486	103	74	1.80644e-09	2.6559e-08	0.326292
NM_001351038	chr12	55939530	55940313	introns_1	0.928571	0.421053	28	19	9.88308e-05	0.000890368	-0.507519
NM_201444	chr12	55940082	55940170	exons_1	0.928571	0.421053	28	19	9.88308e-05	0.000890368	-0.507519
NM_201444	chr12	55940897	55940980	exons_4	0.961538	0.694444	26	36	0.00435028	0.028147	-0.267094
NM_001320122	chr12	55957923	55958084	exons_3	0.393443	0.961165	61	103	1.06582e-16	3.13734e-15	0.567722
NM_001184796	chr12	56137499	56137675	exons_4	0.0322581	0.955556	62	45	4.40168e-26	2.88039e-24	0.923297
NM_079423	chr12	56159587	56159730	exons_3	0.428571	0.913043	28	46	4.74191e-06	5.00387e-05	0.484472
NM_024068	chr12	56225624	56225695	exons_4	0.212766	0.527778	47	36	0.00275287	0.0188341	0.315012
NM_002332	chr12	57211487	57211588	exons_36	0.41573	0.96	89	75	1.86362e-15	4.8254e-14	0.54427
NM_020142	chr12	57236593	57236681	exons_3	0.888889	0.0666667	27	15	3.32772e-08	4.35114e-07	-0.822222
NM_031479	chr12	57454306	57456306	promoters	0.487179	0.935484	39	31	1.91012e-05	0.000188611	0.448304
NM_052897	chr12	57524720	57524822	exons_4	1	0.25	35	16	8.43901e-10	1.28115e-08	-0.75
NM_006576	chr12	57807331	57807489	exons_4	0.346154	0.942308	52	52	1.62794e-11	2.97282e-10	0.596154
NM_006576	chr12	57808395	57808548	exons_7	0.0983607	0.946667	122	75	2.36872e-36	2.73715e-34	0.848306
NR_120452	chr12	58571433	58608877	introns_5	0	0.923077	35	39	1.86332e-19	7.02867e-18	0.923077
NR_126341	chr12	58591869	58812413	introns_1	0.596774	0.918605	124	86	4.77712e-08	6.15988e-07	0.32183
NM_020700	chr12	62648637	62667177	introns_1	0.953125	0.744186	64	43	0.00164643	0.0119669	-0.208939
NM_000706	chr12	63142759	63147645	exons_1	0.666667	0.911111	33	45	0.006655	0.0409312	0.244444
NM_020762	chr12	64094932	64094992	exons_1	0.567568	1	37	45	3.6453e-08	4.7398e-07	0.432432
NM_002076	chr12	64752758	64759084	introns_13	0.96875	0.76	64	25	0.00364709	0.0240687	-0.20875
NM_001193460	chr12	65328604	65368997	introns_4	0.5	0.944444	64	36	9.45514e-07	1.07133e-05	0.444444
NR_120431	chr12	65467135	65499927	introns_1	0.363636	0.909091	55	22	4.31229e-06	4.56661e-05	0.545455
NR_120432	chr12	65500085	65569990	introns_1	0.578947	1	38	14	0.000414581	0.00338393	0.421053
NR_120433	chr12	65538762	65569990	introns_2	0.578947	1	38	14	0.000414581	0.00338393	0.421053
NR_120434	chr12	65558815	65569990	introns_1	0.578947	1	38	14	0.000414581	0.00338393	0.421053
NM_020525	chr12	68252604	68254604	promoters	0.973684	0	76	27	2.07263e-24	1.21593e-22	-0.973684
NM_020525	chr12	68252764	68252829	exons_4	0.973684	0	76	27	2.07263e-24	1.21593e-22	-0.973684
NM_006530	chr12	69370976	69390146	introns_5	0.883721	0.333333	43	15	5.40935e-05	0.000506248	-0.550388
NM_001198842	chr12	69584888	69586888	promoters	0.0357143	0.466667	28	45	1.66059e-05	0.000165294	0.430952
NM_001198842	chr12	69586753	69586818	exons_3	0.0357143	0.466667	28	45	1.66059e-05	0.000165294	0.430952
NM_001278402	chr12	69794515	69795140	introns_2	0.970588	0.555556	34	18	0.000167683	0.00146381	-0.415033
NM_182530	chr12	69824226	69826226	promoters	0.965116	0.75	86	76	3.34317e-05	0.000320532	-0.215116
NM_182530	chr12	69825564	69855279	introns_1	0.965116	0.75	86	76	3.34317e-05	0.000320532	-0.215116
NM_182530	chr12	69880201	69880292	exons_5	0.902439	0.24	41	25	1.92393e-08	2.56113e-07	-0.662439
NM_001330204	chr12	70555870	70556148	exons_16	0.484848	1	33	39	9.27957e-09	1.28166e-07	0.515152
NM_144982	chr12	71656885	71657301	exons_34	0.973684	0.730769	38	26	0.00320248	0.021445	-0.242915
NM_173353	chr12	71949656	71972518	introns_5	0.95122	0.620915	164	153	3.67394e-14	8.59013e-13	-0.330304
NM_013381	chr12	72499498	72499635	exons_5	1	0.727273	52	33	1.48529e-05	0.00014887	-0.272727
NM_139136	chr12	75208748	75210748	promoters	0.113636	0.55	44	20	0.000265853	0.00224647	0.436364
NM_139137	chr12	75208839	75210839	promoters	0.113636	0.55	44	20	0.000265853	0.00224647	0.436364
NM_001024383	chr12	78006419	78007445	exons_8	0	1	34	42	1.56031e-24	9.34983e-23	1
NM_005639	chr12	79353620	79444072	introns_4	1	0.625	38	48	6.59074e-07	7.62635e-06	-0.375
NM_001378609	chr12	80099606	80209412	introns_1	1	0.777778	37	18	0.00194508	0.0139205	-0.222222
NM_001368062	chr12	80131136	80131800	introns_1	1	0.777778	37	18	0.00194508	0.0139205	-0.222222
NM_001220477	chr12	81267908	81268087	exons_4	0.868421	0	38	24	6.89004e-14	1.57413e-12	-0.868421
NR_120491	chr12	81292525	81296633	introns_1	0.0769231	0.454545	26	33	0.000783694	0.0060808	0.377622
NM_001220477	chr12	81294835	81295035	exons_1	0.0769231	0.454545	26	33	0.000783694	0.0060808	0.377622
NR_033192	chr12	82356960	82357269	exons_3	0.97	0	100	34	2.51278e-30	2.13363e-28	-0.97
NM_001320321	chr12	82895818	82896646	exons_1	0.0882353	0.941176	34	17	3.36501e-10	5.28054e-09	0.852941
NM_005447	chr12	85800703	85805962	exons_1	0.0810811	0.8	37	20	1.77824e-08	2.37624e-07	0.718919
NM_001351291	chr12	85955668	85980430	exons_1	0.215517	0.826087	116	46	3.1822e-13	6.80676e-12	0.61057
NR_147093	chr12	85979796	85983522	introns_1	0.215517	0.826087	116	46	3.1822e-13	6.80676e-12	0.61057
NM_001363616	chr12	87985850	87986053	exons_3	0.0133333	0.95122	75	41	1.50627e-28	1.14047e-26	0.937886
NM_025114	chr12	88115183	88117032	introns_36	1	0.636364	46	44	2.55628e-07	3.0883e-06	-0.363636
NM_000899	chr12	88492793	88497181	exons_1	0.98	0.735294	50	34	0.000472472	0.00380682	-0.244706
NM_001920	chr12	91181817	91183817	promoters	0.641026	0.958333	39	24	0.00163145	0.0118663	0.317308
NM_001920	chr12	91182655	91182817	exons_1	0.641026	0.958333	39	24	0.00163145	0.0118663	0.317308
NR_120492	chr12	93176030	93181304	introns_2	0.236842	0.818182	38	22	7.30683e-06	7.58081e-05	0.58134
NR_040096	chr12	93215680	93328026	introns_1	0.764706	1	34	19	0.00499894	0.0318187	0.235294
NM_001330126	chr12	93677768	93679768	promoters	0.2	0.6	30	25	0.0020892	0.0148005	0.4
NM_003805	chr12	93678769	93679072	exons_1	0.2	0.6	30	25	0.0020892	0.0148005	0.4
NM_005761	chr12	94186474	94209589	introns_4	0.912621	0.0181818	103	55	1.28446e-32	1.26474e-30	-0.89444
NM_001042399	chr12	94412592	94459556	introns_1	0.0555556	0.954545	36	22	1.7035e-13	3.72938e-12	0.89899
NM_001368038	chr12	94412592	94460199	introns_1	0.0555556	0.954545	36	22	1.7035e-13	3.72938e-12	0.89899
NM_016122	chr12	94412592	94435274	introns_1	0.0555556	0.954545	36	22	1.7035e-13	3.72938e-12	0.89899
NM_001329702	chr12	95713339	95737865	introns_4	0.0681818	0.927273	88	55	6.8585e-28	4.97728e-26	0.859091
NM_182496	chr12	95936524	95942430	introns_15	0.95122	0.346154	41	26	3.55062e-08	4.6296e-07	-0.605066
NR_152618	chr12	97461775	97463775	promoters	0.939394	0.354839	33	31	2.08464e-07	2.54045e-06	-0.584555
NR_152618	chr12	97463290	97492460	introns_2	0.932584	0.604167	89	48	3.03365e-06	3.27372e-05	-0.328418
NR_024037	chr12	97464019	97466019	promoters	0.959184	0.583333	49	24	6.57458e-05	0.000607975	-0.37585
NM_201613	chr12	98613424	98614340	exons_1	0.0958904	1	146	142	2.6947e-68	1.11913e-65	0.90411
NM_001352202	chr12	99153766	99155766	promoters	0.0392157	0.934959	153	123	2.2904e-60	7.16963e-58	0.895744
NM_001352196	chr12	99153799	99155799	promoters	0.0392157	0.934959	153	123	2.2904e-60	7.16963e-58	0.895744
NM_001204066	chr12	99153929	99155929	promoters	0.0392157	0.934959	153	123	2.2904e-60	7.16963e-58	0.895744
NM_001204067	chr12	99154090	99156090	promoters	0.0392157	0.934959	153	123	2.2904e-60	7.16963e-58	0.895744
NM_001352196	chr12	99154289	99154799	exons_1	0.056338	0.911392	71	79	4.42833e-30	3.71501e-28	0.855054
NM_001352202	chr12	99154289	99154766	exons_1	0.056338	0.911392	71	79	4.42833e-30	3.71501e-28	0.855054
NM_001352185	chr12	99154396	99244341	introns_1	0.217617	0.943396	193	159	2.16726e-48	4.30843e-46	0.72578
NM_001204066	chr12	99154396	99154807	introns_1	0.056338	0.911392	71	79	4.42833e-30	3.71501e-28	0.855054
NM_001204067	chr12	99154396	99154969	introns_1	0.056338	0.911392	71	79	4.42833e-30	3.71501e-28	0.855054
NM_001204067	chr12	99154970	99155090	exons_1	0.0227273	1	44	18	2.90413e-16	8.20867e-15	0.977273
NM_014503	chr12	101333301	101333444	exons_28	1	0.74359	30	39	0.000365142	0.00301323	-0.25641
NM_000277	chr12	102877551	102894734	introns_10	0.0714286	0.666667	56	21	1.09974e-07	1.38237e-06	0.595238
NM_001145199	chr12	105330938	105348601	introns_1	0.333333	0.0731707	42	41	0.00237824	0.0165244	-0.260163
NM_001160708	chr12	106463478	106463620	exons_23	1	0.642857	98	56	1.22285e-11	2.26263e-10	-0.357143
NM_001017523	chr12	107642172	107649205	introns_6	0.972222	0.0862069	72	58	5.67181e-29	4.41391e-27	-0.886015
NM_004072	chr12	108292960	108329994	introns_1	0.939394	0.657895	66	38	0.000222297	0.00190101	-0.281499
NM_001142343	chr12	108293665	108329994	introns_1	0.939394	0.657895	66	38	0.000222297	0.00190101	-0.281499
NM_001142344	chr12	108293665	108339026	introns_1	0.939394	0.657895	66	38	0.000222297	0.00190101	-0.281499
NM_001142345	chr12	108293665	108320544	introns_1	0.939394	0.657895	66	38	0.000222297	0.00190101	-0.281499
NR_120462	chr12	109358488	109360488	promoters	0.954198	0.0309278	131	97	1.65086e-53	3.95697e-51	-0.923271
NR_120462	chr12	109359261	109359488	exons_3	0.930556	0.0333333	72	60	7.26306e-30	6.009e-28	-0.897222
NM_001177428	chr12	109808296	109808468	exons_2	0.218391	0.970149	87	67	3.52022e-24	2.03108e-22	0.751758
NM_001681	chr12	110282796	110292019	introns_3	0.975	0.0377358	40	53	8.16286e-24	4.60834e-22	-0.937264
NM_057180	chr12	110496012	110496203	exons_2	0.979167	0.666667	48	12	0.00214333	0.0151175	-0.3125
NR_104102	chr12	110496012	110496094	exons_1	0.979167	0.666667	48	12	0.00214333	0.0151175	-0.3125
NM_001368051	chr12	110502384	110505616	introns_1	1	0.694444	33	36	5.62251e-05	0.00052526	-0.305556
NM_001368054	chr12	110502384	110515049	introns_1	1	0.694444	33	36	5.62251e-05	0.00052526	-0.305556
NM_001286534	chr12	110503806	110503876	exons_1	1	0.694444	33	36	5.62251e-05	0.00052526	-0.305556
NM_001368053	chr12	110503806	110503874	exons_1	1	0.694444	33	36	5.62251e-05	0.00052526	-0.305556
NM_001370598	chr12	111217938	111263760	introns_3	0.99115	0.758621	113	87	2.58482e-08	3.41382e-07	-0.23253
NM_001370598	chr12	111320012	111320775	exons_8	0.922414	0.0338983	116	59	9.6682e-35	1.03719e-32	-0.888515
NM_000690	chr12	111809543	111817531	exons_3	0	0.666667	50	21	3.70174e-11	6.46432e-10	0.666667
NM_001347954	chr12	112847843	112865413	introns_2	0.264706	0.785714	34	28	2.79102e-05	0.000269689	0.521008
NM_002535	chr12	112977518	112979518	promoters	0.972973	0.0714286	37	14	4.14279e-11	7.18443e-10	-0.901544
NM_002535	chr12	112978519	112978785	exons_1	0.972973	0.0714286	37	14	4.14279e-11	7.18443e-10	-0.901544
NM_001144872	chr12	113148857	113150857	promoters	0.910256	0	78	50	7.47039e-30	6.16837e-28	-0.910256
NM_001144872	chr12	113149858	113149913	exons_1	0.833333	0	36	27	1.36655e-13	3.03769e-12	-0.833333
NM_001144872	chr12	113149914	113151917	introns_1	0.97619	0	42	23	2.61652e-18	8.87247e-17	-0.97619
NM_017901	chr12	113226965	113260367	introns_1	0.984127	0.490566	63	53	2.55249e-11	4.56574e-10	-0.493561
NM_001351346	chr12	113232608	113260367	introns_1	0.984127	0.490566	63	53	2.55249e-11	4.56574e-10	-0.493561
NM_001301214	chr12	113244362	113260367	introns_1	0.984127	0.490566	63	53	2.55249e-11	4.56574e-10	-0.493561
NM_001351347	chr12	113244744	113260367	introns_1	0.984127	0.490566	63	53	2.55249e-11	4.56574e-10	-0.493561
NM_001146699	chr12	113939960	113940160	exons_10	0.979592	0.4	98	65	1.84372e-18	6.30804e-17	-0.579592
NM_016569	chr12	114672303	114674164	introns_1	0.481481	0.0869565	27	23	0.00148002	0.0108344	-0.394525
NM_015335	chr12	116237706	116277059	introns_1	0.476923	0.253521	130	71	0.00166583	0.0120995	-0.223402
NM_153348	chr12	116988870	117010322	introns_1	1	0.680851	57	47	2.08867e-07	2.54389e-06	-0.319149
NM_019086	chr12	118071359	118071469	exons_4	0.0555556	1	36	37	2.42676e-20	9.9407e-19	0.944444
NM_001346494	chr12	118189535	118191535	promoters	0.905797	0.0152672	138	131	1.24701e-59	3.65785e-57	-0.89053
NM_001346494	chr12	118189807	118190535	exons_1	0.905797	0.0152672	138	131	1.24701e-59	3.65785e-57	-0.89053
NM_016281	chr12	118189807	118189941	exons_1	0.84058	0	69	59	5.31752e-27	3.66856e-25	-0.84058
NM_001346490	chr12	118189942	118199023	introns_1	0.971014	0.0277778	69	72	1.8522e-36	2.1462e-34	-0.943237
NM_001346495	chr12	118189942	118190182	introns_1	0.971014	0.0277778	69	72	1.8522e-36	2.1462e-34	-0.943237
NM_016281	chr12	118189942	118199050	introns_1	0.971014	0.0277778	69	72	1.8522e-36	2.1462e-34	-0.943237
NM_194286	chr12	119130835	119145380	introns_8	0.463415	0.975	82	80	4.72611e-15	1.18424e-13	0.511585
NM_178499	chr12	119335267	119428682	introns_1	0.946903	0.0434783	113	46	3.96103e-31	3.58081e-29	-0.903424
NM_178499	chr12	119479094	119479201	exons_4	0.738095	0.95	42	40	0.00609496	0.0379485	0.211905
NM_001136534	chr12	119594035	119629735	introns_1	0.758621	0	29	38	3.7522e-13	7.97314e-12	-0.758621
NM_001206999	chr12	119785066	119803205	introns_8	0.904762	0.551724	42	29	0.000575985	0.00456716	-0.353038
NM_001206999	chr12	119803390	119822819	introns_9	0.931373	0.728477	204	151	1.57308e-07	1.93787e-06	-0.202896
NM_207311	chr12	119990298	119998520	introns_1	1	0.0434783	34	23	1.80881e-16	5.2003e-15	-0.956522
NM_002442	chr12	120341330	120343105	exons_1	0.926829	0.490909	82	55	4.55529e-09	6.49477e-08	-0.43592
NM_002442	chr12	120363043	120363135	exons_10	0.566667	1	30	45	1.14259e-07	1.42981e-06	0.433333
NM_000545	chr12	120977542	120979542	promoters	0.0847458	0.759124	118	137	2.63118e-30	2.22515e-28	0.674378
NM_000545	chr12	120978543	120979094	exons_1	0.0847458	0.759124	118	137	2.63118e-30	2.22515e-28	0.674378
NM_001261397	chr12	121222963	121228532	introns_1	0.233333	1	30	17	1.16873e-08	1.5953e-07	0.766667
NM_001256796	chr12	121223044	121228532	introns_1	0.233333	1	30	17	1.16873e-08	1.5953e-07	0.766667
NM_001270485	chr12	121237692	121240869	exons_1	0.25	0	28	39	0.000255143	0.00216338	-0.25
NM_001270486	chr12	121240543	121244572	introns_1	0.25	0	28	39	0.000255143	0.00216338	-0.25
NM_032590	chr12	121442157	121442836	exons_4	0.975207	0.271739	242	184	3.08673e-60	9.5908e-58	-0.703467
NR_152735	chr12	121796243	121799846	introns_1	0.34375	0	32	19	0.000532376	0.0042511	-0.34375
NM_001353345	chr12	121810836	121814105	introns_6	0.555556	0.136364	36	22	0.000952578	0.00728475	-0.419192
NR_135044	chr12	122062289	122064289	promoters	0.823529	0.181818	34	22	9.96111e-07	1.1244e-05	-0.641711
NR_135044	chr12	122063532	122064549	introns_1	0.823529	0.181818	34	22	9.96111e-07	1.1244e-05	-0.641711
NM_001098519	chr12	122191568	122192744	introns_6	0.918919	0.466667	37	15	0.00050117	0.00402414	-0.452252
NR_027918	chr12	122813420	122826421	introns_1	1	0.555556	33	18	9.6407e-06	9.85834e-05	-0.444444
NM_201435	chr12	122823460	122826421	introns_1	1	0.555556	33	18	9.6407e-06	9.85834e-05	-0.444444
NM_001167856	chr12	123326152	123326334	exons_19	0.981308	0.73913	107	69	4.33802e-07	5.11131e-06	-0.242178
NM_001372106	chr12	123787804	123788002	exons_9	0.927273	0	55	34	5.77258e-22	2.73601e-20	-0.927273
NM_006312	chr12	124385888	124398118	introns_4	1	0.668966	171	145	2.83478e-20	1.15109e-18	-0.331034
NM_001367981	chr12	124778587	124786106	introns_1	0.298507	0.787234	67	47	1.41834e-07	1.75291e-06	0.488727
NM_001367987	chr12	124778587	124786356	introns_1	0.298507	0.787234	67	47	1.41834e-07	1.75291e-06	0.488727
NM_001367984	chr12	124782809	124786356	introns_1	0.298507	0.787234	67	47	1.41834e-07	1.75291e-06	0.488727
NR_160416	chr12	124782809	124786352	introns_1	0.298507	0.787234	67	47	1.41834e-07	1.75291e-06	0.488727
NM_001367986	chr12	124782812	124786440	introns_1	0.298507	0.787234	67	47	1.41834e-07	1.75291e-06	0.488727
NR_160419	chr12	124782812	124786356	introns_1	0.298507	0.787234	67	47	1.41834e-07	1.75291e-06	0.488727
NM_001367982	chr12	124785703	124786503	exons_1	0.298507	0.787234	67	47	1.41834e-07	1.75291e-06	0.488727
NM_001366854	chr12	125415678	125519438	introns_2	1	0.75	58	20	0.000129317	0.0011502	-0.25
NR_146537	chr12	127275575	127283235	introns_2	0.0731707	0.59375	41	32	6.83686e-07	7.87637e-06	0.520579
NM_001351230	chr12	130479017	130506647	introns_1	0.966667	0	30	20	1.3812e-14	3.33925e-13	-0.966667
NM_001351230	chr12	130506648	130506770	exons_2	1	0	35	17	5.18249e-16	1.41619e-14	-1
NM_001351051	chr12	130798636	130801152	introns_1	1	0.787234	50	47	7.34447e-05	0.000675447	-0.212766
NM_003565	chr12	131909775	131909833	exons_9	1	0.166667	45	30	1.30569e-16	3.79282e-15	-0.833333
NM_003565	chr12	131909834	131909918	introns_9	0.944444	0.189189	54	37	8.8803e-15	2.16566e-13	-0.755255
NM_003565	chr12	131909919	131910001	exons_10	0.971429	0.401709	175	117	4.83695e-30	4.04165e-28	-0.569719
NR_106821	chr12	132580996	132582996	promoters	0.973913	0.314607	115	89	7.29692e-27	4.99309e-25	-0.659306
NM_001142641	chr12	132581825	132582061	introns_4	1	0.16129	54	31	1.47726e-18	5.08745e-17	-0.83871
NM_001142641	chr12	132582062	132582266	exons_1	0.958333	0	24	28	1.98519e-15	5.11177e-14	-0.958333
NR_126380	chr13	20101700	20103700	promoters	0.529412	0.952381	34	42	7.31478e-06	7.58336e-05	0.422969
NR_126380	chr13	20102926	20103230	exons_2	0.529412	0.952381	34	42	7.31478e-06	7.58336e-05	0.422969
NM_021954	chr13	20143306	20160889	introns_1	0.648649	0	37	20	5.25841e-08	6.75764e-07	-0.648649
NM_001363647	chr13	20432297	20489369	introns_4	0.914894	0.62963	47	27	0.00295972	0.020079	-0.285264
NM_015974	chr13	20439755	20489369	introns_1	0.914894	0.62963	47	27	0.00295972	0.020079	-0.285264
NM_001385225	chr13	20701656	20721635	introns_1	0.958678	0.46988	121	83	1.25742e-16	3.66022e-15	-0.488798
NR_169590	chr13	20703321	20721635	introns_1	0.958678	0.46988	121	83	1.25742e-16	3.66022e-15	-0.488798
NM_001385221	chr13	20704292	20721635	introns_1	0.958678	0.46988	121	83	1.25742e-16	3.66022e-15	-0.488798
NR_169591	chr13	20717370	20721635	introns_2	0.975309	0.111111	81	36	6.40321e-23	3.24383e-21	-0.864198
NM_002010	chr13	21681146	21701189	introns_2	0.711864	0.919355	59	62	0.00252366	0.0174108	0.20749
NM_005932	chr13	23870196	23874845	introns_14	0.972973	0.454545	74	22	2.5098e-08	3.31787e-07	-0.518428
NM_152912	chr13	27449602	27451602	promoters	0.538462	0	39	26	1.24027e-07	1.5465e-06	-0.538462
NM_001206559	chr13	27621141	27648378	introns_1	0.945	0.553571	200	168	4.9286e-20	1.94117e-18	-0.391429
NM_152705	chr13	27622010	27648378	introns_1	0.945	0.553571	200	168	4.9286e-20	1.94117e-18	-0.391429
NM_015972	chr13	27622875	27623448	exons_1	0.945	0.553571	200	168	4.9286e-20	1.94117e-18	-0.391429
NM_001265	chr13	27963370	27964869	introns_1	0.333333	0.941176	30	34	7.37649e-08	9.40469e-07	0.607843
NM_001354700	chr13	27963370	27964873	introns_1	0.333333	0.941176	30	34	7.37649e-08	9.40469e-07	0.607843
NM_002019	chr13	28329729	28334024	introns_12	1	0.0344828	34	29	1.10751e-18	3.85206e-17	-0.965517
NM_001384605	chr13	29033885	29034125	exons_3	0.777778	1	27	47	0.000304365	0.00254828	0.222222
NM_001384605	chr13	29502993	29505947	exons_6	0	0.277778	36	18	0.000518706	0.00415619	0.277778
NR_047501	chr13	29919073	29926502	introns_1	0.833333	0.0588235	30	17	4.3589e-08	5.63273e-07	-0.77451
NM_001014380	chr13	30283792	30306939	introns_10	0.153846	0.9	39	50	9.44619e-14	2.13141e-12	0.746154
NM_032116	chr13	30283792	30307330	introns_1	0.153846	0.9	39	50	9.44619e-14	2.13141e-12	0.746154
NM_001313893	chr13	30462538	30462712	exons_1	0.948718	0.609756	39	41	0.000127213	0.0011322	-0.338962
NM_001286505	chr13	31158864	31161981	introns_3	0.592593	0	54	12	1.75569e-05	0.000174347	-0.592593
NM_001349704	chr13	31158864	31161475	introns_1	0.592593	0	54	12	1.75569e-05	0.000174347	-0.592593
NM_194318	chr13	31200155	31215050	introns_1	0.0212766	0.941176	47	34	3.64477e-20	1.46021e-18	0.9199
NM_194318	chr13	31317566	31317685	exons_13	1	0.552632	115	76	6.37875e-18	2.10018e-16	-0.447368
NR_027062	chr13	31846940	31946008	introns_1	0	0.956522	42	23	4.76857e-18	1.58883e-16	0.956522
NM_023037	chr13	32295202	32299125	exons_61	0.625	0.985294	72	68	4.43375e-09	6.35007e-08	0.360294
NR_047020	chr13	32809641	32877430	introns_1	0.878788	0.0909091	33	33	7.27154e-12	1.37269e-10	-0.787879
NM_004795	chr13	33055047	33055315	exons_3	0.230769	0.95	26	40	2.47794e-10	3.92521e-09	0.719231
NM_001243476	chr13	33167623	33439690	introns_7	0.123762	0.351351	404	259	4.52873e-12	8.74193e-11	0.227589
NM_052851	chr13	33167623	33205818	introns_1	0.380282	0.876712	71	73	1.82816e-10	2.94712e-09	0.496431
NM_178006	chr13	33167623	33285469	introns_1	0.520833	0.90099	96	101	1.15207e-09	1.7222e-08	0.380157
NM_178007	chr13	33185091	33187091	promoters	0.0243902	0.818182	41	33	3.43623e-14	8.04781e-13	0.793792
NM_178007	chr13	33185878	33186091	exons_1	0.0243902	0.818182	41	33	3.43623e-14	8.04781e-13	0.793792
NM_001243476	chr13	33439725	33524237	introns_1	0.964912	0.73913	57	46	0.000608447	0.00479285	-0.225782
NM_001330072	chr13	35774700	35793365	introns_1	0.971429	0.65	35	20	0.00110548	0.00834904	-0.321429
NM_004734	chr13	35774700	35788211	introns_1	0.971429	0.65	35	20	0.00110548	0.00834904	-0.321429
NM_001198910	chr13	36248606	36248682	exons_1	0.977778	0.733333	45	15	0.00640767	0.0396367	-0.244444
NM_001378621	chr13	36853419	36853675	exons_2	0.510638	1	47	35	1.40151e-08	1.8921e-07	0.489362
NM_013338	chr13	36965575	36965726	exons_2	0.771429	1	35	17	0.00805374	0.0480886	0.228571
NM_001135958	chr13	37692336	37782955	introns_1	0.935484	0.217391	31	23	1.34028e-08	1.81646e-07	-0.718093
NM_003306	chr13	37745937	37746455	exons_1	0.935484	0.217391	31	23	1.34028e-08	1.81646e-07	-0.718093
NM_005780	chr13	39342892	39344054	exons_1	0.982456	0.755556	57	45	0.00020671	0.00177677	-0.226901
NR_024506	chr13	40474096	40480908	introns_4	0	0.969697	31	33	4.22672e-19	1.54437e-17	0.969697
NR_024506	chr13	40480006	40482006	promoters	0	0.969697	31	33	4.22672e-19	1.54437e-17	0.969697
NM_001204505	chr13	42221395	42225289	introns_1	1	0.72	56	25	2.19895e-05	0.000215608	-0.28
NM_178009	chr13	42221395	42229098	introns_1	1	0.72	56	25	2.19895e-05	0.000215608	-0.28
NM_001347963	chr13	43412989	43667478	introns_1	0.988024	0.741007	167	139	2.67032e-12	5.29095e-11	-0.247017
NM_001347967	chr13	43412989	43667467	introns_1	0.988024	0.741007	167	139	2.67032e-12	5.29095e-11	-0.247017
NM_001127615	chr13	43484153	43609882	introns_1	0.988095	0.578947	84	76	3.20788e-12	6.29657e-11	-0.409148
NM_001242863	chr13	43484153	43667467	introns_1	0.988095	0.578947	84	76	3.20788e-12	6.29657e-11	-0.409148
NM_001347964	chr13	43484153	43630594	introns_1	0.988095	0.578947	84	76	3.20788e-12	6.29657e-11	-0.409148
NM_001347966	chr13	43484153	43667478	introns_1	0.988095	0.578947	84	76	3.20788e-12	6.29657e-11	-0.409148
NM_017993	chr13	43484153	43667441	introns_1	0.988095	0.578947	84	76	3.20788e-12	6.29657e-11	-0.409148
NM_001347965	chr13	43484153	43786651	introns_1	0.970238	0.757962	168	157	2.94578e-09	4.27704e-08	-0.212276
NM_001286341	chr13	45702466	45713181	introns_1	0.5625	0.04	64	25	6.62041e-07	7.65435e-06	-0.5225
NM_152719	chr13	45702856	45713181	introns_1	0.5625	0.04	64	25	6.62041e-07	7.65435e-06	-0.5225
NM_001286342	chr13	45703592	45713181	introns_1	0.5625	0.04	64	25	6.62041e-07	7.65435e-06	-0.5225
NM_152719	chr13	45713182	45714559	exons_1	0.432927	0.0447761	164	67	1.65054e-10	2.67518e-09	-0.388151
NM_198849	chr13	45777242	45784057	exons_1	0.424242	0.05	99	60	3.05039e-08	3.99974e-07	-0.374242
NM_001286765	chr13	46363214	46368041	introns_9	0.131579	1	38	32	2.42932e-16	6.90849e-15	0.868421
NM_001164213	chr13	46723221	46723330	exons_1	0.978261	0.0454545	46	44	2.96572e-23	1.58068e-21	-0.932806
NM_001165947	chr13	46835640	46892389	introns_1	0.565217	0.968254	92	63	9.6088e-10	1.4493e-08	0.403037
NM_000321	chr13	48307407	48342598	introns_2	0.866667	0.529412	45	17	0.00657002	0.0404559	-0.337255
NR_003923	chr13	50994812	51004252	introns_1	1	0.736842	36	38	0.000118809	0.00106214	-0.263158
NM_001011705	chr13	52703808	52708535	introns_1	1	0.333333	53	30	2.62248e-13	5.64116e-12	-0.666667
NM_007015	chr13	52703811	52708535	introns_1	1	0.333333	53	30	2.62248e-13	5.64116e-12	-0.666667
NM_006418	chr13	53034348	53034500	exons_2	1	0	81	89	4.1782e-53	9.79099e-51	-1
NM_001258368	chr13	60093733	60163586	introns_1	0.981132	0.32	53	25	5.45506e-11	9.32048e-10	-0.661132
NM_001042517	chr13	60112187	60132956	introns_1	0.981132	0.32	53	25	5.45506e-11	9.32048e-10	-0.661132
NM_001258366	chr13	60112187	60163586	introns_1	0.981132	0.32	53	25	5.45506e-11	9.32048e-10	-0.661132
NM_001318373	chr13	66305029	66631209	introns_1	1	0.378378	37	37	6.5763e-11	1.11364e-09	-0.621622
NM_080759	chr13	71489149	71557023	introns_1	0.892857	0.216216	28	37	1.26e-08	1.71486e-07	-0.676641
NM_004392	chr13	71681911	71865921	introns_1	0.03125	0.966667	64	60	1.60332e-31	1.4879e-29	0.935417
NR_146206	chr13	72931268	72965273	introns_5	1	0.65	40	20	3.14221e-05	0.000302093	-0.35
NM_001286818	chr13	73063884	73075707	introns_2	0.980583	0.769231	103	52	2.08567e-05	0.000204932	-0.211352
NM_007249	chr13	73764938	73765000	exons_3	1	0.681818	76	44	2.08678e-08	2.77439e-07	-0.318182
NM_001286659	chr13	75306472	75309941	introns_7	0.382979	1	47	27	1.49449e-09	2.20965e-08	0.617021
NM_001160706	chr13	77534673	77536673	promoters	0.176471	0.909091	34	22	1.35237e-08	1.83107e-07	0.73262
NM_144777	chr13	77534705	77536705	promoters	0.176471	0.909091	34	22	1.35237e-08	1.83107e-07	0.73262
NM_001160706	chr13	77535825	77555856	introns_1	0.176471	0.909091	34	22	1.35237e-08	1.83107e-07	0.73262
NM_001366665	chr13	77761111	77763144	introns_3	0	0.928571	28	14	2.21877e-11	3.99264e-10	0.928571
NR_103853	chr13	77834991	77907691	introns_6	0.0133333	0.964286	75	56	1.45696e-34	1.54328e-32	0.950952
NM_001201397	chr13	77895481	77898334	exons_1	0.0133333	0.964286	75	56	1.45696e-34	1.54328e-32	0.950952
NM_001122659	chr13	77895487	77898334	exons_1	0.0133333	0.964286	75	56	1.45696e-34	1.54328e-32	0.950952
NM_003991	chr13	77896559	77899858	introns_1	0.0133333	0.964286	75	56	1.45696e-34	1.54328e-32	0.950952
NM_032229	chr13	85792791	85796532	exons_1	0.923077	0.128205	39	39	4.58066e-14	1.06176e-12	-0.794872
NM_005708	chr13	93227617	93545262	introns_1	0.54878	0.810127	82	79	0.000332042	0.00276291	0.261346
NM_005708	chr13	93830546	94027728	introns_1	0.509434	0.857143	106	91	1.03811e-07	1.30804e-06	0.347709
NR_046536	chr13	93830816	93830955	exons_1	0.0238095	0.833333	42	42	2.18293e-16	6.24166e-15	0.809524
NR_046535	chr13	94154407	94186905	introns_1	1	0.769231	40	13	0.00268263	0.0184106	-0.230769
NM_005708	chr13	94382414	94382550	exons_3	0.69697	0.944444	66	36	0.00161205	0.0117353	0.247475
NR_110754	chr13	94764552	94905463	introns_2	0.654676	0.963768	139	138	3.71291e-12	7.23035e-11	0.309092
NM_001366678	chr13	99014785	99016785	promoters	0.875	0.555556	32	36	0.00298938	0.0202181	-0.319444
NR_104592	chr13	99859050	99862990	introns_1	0.753846	0.968992	195	129	1.44493e-08	1.94572e-07	0.215146
NM_033132	chr13	99965820	99970126	introns_1	0.333333	0	30	25	0.000186298	0.00161355	-0.333333
NR_146224	chr13	99965820	99969768	introns_1	0.333333	0	30	25	0.000186298	0.00161355	-0.333333
NR_146225	chr13	99965820	99968959	introns_1	0.333333	0	30	25	0.000186298	0.00161355	-0.333333
NR_146225	chr13	99968172	99970172	promoters	0.333333	0	30	25	0.000186298	0.00161355	-0.333333
NR_148031	chr13	100302999	100307191	introns_1	0.168142	0.952381	113	42	8.36572e-21	3.57341e-19	0.784239
NR_148029	chr13	100305835	100307191	introns_1	0.168142	0.952381	113	42	8.36572e-21	3.57341e-19	0.784239
NM_001330588	chr13	102649487	102651358	introns_23	0.9	0.547619	30	42	0.000781804	0.00607063	-0.352381
NM_003291	chr13	102649487	102657055	introns_1	0.9	0.547619	30	42	0.000781804	0.00607063	-0.352381
NM_001080396	chr13	107210756	107865681	introns_2	0.974359	0.766304	273	184	1.25861e-12	2.56032e-11	-0.208055
NM_001267728	chr13	110719229	110721074	exons_1	0.962042	0.0942029	764	414	1.35304e-221	8.10778e-218	-0.867839
NM_198219	chr13	110719229	110723337	exons_1	0.962042	0.0942029	764	414	1.35304e-221	8.10778e-218	-0.867839
NM_017664	chr13	110880113	110883697	introns_1	1	0.58	47	50	7.80412e-09	1.08466e-07	-0.42
NR_104587	chr13	110880113	110883729	introns_1	1	0.58	47	50	7.80412e-09	1.08466e-07	-0.42
NR_120392	chr13	111971309	111973309	promoters	0.959184	0	49	22	7.32066e-18	2.38781e-16	-0.959184
NR_120392	chr13	111972394	112095474	introns_1	0.578714	0.185053	451	281	4.32396e-27	3.00286e-25	-0.393661
NM_001286279	chr13	112554887	112555005	exons_3	0.980392	0.73913	51	23	0.00149579	0.010946	-0.241262
NR_120385	chr13	113351971	113361558	introns_1	1	0.025	34	40	5.18494e-22	2.46864e-20	-0.975
NR_046541	chr13	113355166	113356121	exons_1	1	0.025	34	40	5.18494e-22	2.46864e-20	-0.975
NM_001286733	chr13	113355323	113355481	exons_1	1	0.025	34	40	5.18494e-22	2.46864e-20	-0.975
NM_001014283	chr13	113480744	113483839	introns_5	1	0.04	41	25	9.66542e-19	3.37892e-17	-0.96
NM_002929	chr13	113732884	113733085	exons_6	0.977273	0.53125	44	32	7.64432e-07	8.77288e-06	-0.446023
NM_182614	chr13	113758225	113760225	promoters	0.804878	0	41	30	3.20875e-14	7.53185e-13	-0.804878
NM_182614	chr13	113759226	113759315	exons_1	0.804878	0	41	30	3.20875e-14	7.53185e-13	-0.804878
NM_001005500	chr14	19779322	19781322	promoters	0.444444	0.964789	153	142	1.31321e-25	8.40976e-24	0.520344
NM_001005500	chr14	19780323	19781264	exons_1	0.444444	0.964789	153	142	1.31321e-25	8.40976e-24	0.520344
NM_001004723	chr14	19827440	19830253	exons_2	0.930233	0.538462	43	52	8.29829e-06	8.55444e-05	-0.391771
NM_138376	chr14	20295312	20295526	exons_3	0.612903	1	31	21	0.000119506	0.00106792	0.387097
NM_001001968	chr14	20640691	20642691	promoters	0.016129	0.794118	62	34	3.42037e-17	1.04876e-15	0.777989
NM_001001968	chr14	20640696	20641691	exons_1	0.016129	0.794118	62	34	3.42037e-17	1.04876e-15	0.777989
NM_002933	chr14	20801228	20802093	exons_1	1	0.536585	36	41	5.80449e-08	7.42529e-07	-0.463415
NM_198232	chr14	20801364	20803364	promoters	1	0.536585	36	41	5.80449e-08	7.42529e-07	-0.463415
NM_002933	chr14	20801844	20803844	promoters	1	0.536585	36	41	5.80449e-08	7.42529e-07	-0.463415
NM_001282211	chr14	21023322	21070827	introns_1	0.630952	0.369565	168	138	4.7119e-06	4.97472e-05	-0.261387
NM_018071	chr14	21078884	21079010	exons_5	0.777778	1	27	20	0.00691192	0.0423252	0.222222
NM_018071	chr14	21081509	21082119	exons_8	0.037037	0.95098	108	102	4.7588e-49	9.64313e-47	0.913943
NM_001102454	chr14	21091543	21091864	introns_2	0.379747	0	79	30	1.33876e-06	1.48678e-05	-0.379747
NM_031314	chr14	21230958	21231072	exons_1	0.993711	0.459016	159	122	9.89613e-30	8.07593e-28	-0.534694
NM_004500	chr14	21230997	21231072	exons_1	0.993711	0.459016	159	122	9.89613e-30	8.07593e-28	-0.534694
NM_020920	chr14	21400151	21400307	exons_4	0.462264	0.802817	106	71	3.41961e-06	3.67321e-05	0.340553
NM_001303523	chr14	21477285	21487450	introns_1	0.380952	0.164062	147	128	4.89453e-05	0.000460121	-0.21689
NM_001001912	chr14	21664082	21666082	promoters	0.767241	0.987179	116	78	1.20792e-06	1.34706e-05	0.219938
NM_001001912	chr14	21665083	21666024	exons_1	0.767241	0.987179	116	78	1.20792e-06	1.34706e-05	0.219938
NR_148361	chr14	22382406	22481240	introns_1	0.497076	0.91411	171	163	4.30915e-18	1.43911e-16	0.417034
NR_148362	chr14	22403764	22432665	introns_3	0.175	0.777778	40	54	2.14753e-09	3.14306e-08	0.602778
NR_148361	chr14	22481359	22482852	introns_1	0.047619	1	42	36	8.67479e-22	4.03407e-20	0.952381
NM_173527	chr14	22882221	22884221	promoters	0.153846	0.822222	39	45	1.69215e-10	2.73521e-09	0.668376
NM_173527	chr14	22883222	22883390	exons_1	0.153846	0.822222	39	45	1.69215e-10	2.73521e-09	0.668376
NM_173527	chr14	22886024	22886231	exons_4	0.31982	0.017094	222	117	1.41156e-13	3.13111e-12	-0.302726
NM_001077352	chr14	22918149	22920149	promoters	1	0	35	13	6.98562e-14	1.59336e-12	-1
NR_120599	chr14	22918455	22920455	promoters	1	0	35	13	6.98562e-14	1.59336e-12	-1
NM_001077352	chr14	22918999	22919149	exons_1	1	0	35	13	6.98562e-14	1.59336e-12	-1
NM_001282953	chr14	22927615	22928496	introns_1	0.944444	0.487805	108	82	1.32977e-13	2.95908e-12	-0.45664
NM_001282956	chr14	22928126	22928211	exons_1	0.944444	0.487805	108	82	1.32977e-13	2.95908e-12	-0.45664
NM_001130725	chr14	23033368	23033674	exons_1	0.848485	0.236842	33	38	8.78368e-08	1.11446e-06	-0.611643
NM_002471	chr14	23390057	23390446	exons_4	0.0892308	0.90379	325	343	1.2985e-113	2.01729e-110	0.814559
NM_032452	chr14	23570928	23571460	exons_2	0.393939	0.764706	66	68	1.0429e-05	0.000106385	0.370766
NM_203402	chr14	24132211	24132849	exons_2	0.206897	0.972603	58	73	2.25344e-22	1.10812e-20	0.765706
NM_176783	chr14	24135157	24137157	promoters	0.894737	0.4375	38	48	4.42798e-06	4.67967e-05	-0.457237
NM_001281529	chr14	24135193	24137193	promoters	0.894737	0.4375	38	48	4.42798e-06	4.67967e-05	-0.457237
NM_001281529	chr14	24136985	24137017	exons_2	0.894737	0.4375	38	48	4.42798e-06	4.67967e-05	-0.457237
NM_014169	chr14	24212488	24214488	promoters	1	0	41	21	5.11952e-19	1.86248e-17	-1
NM_001198568	chr14	24332989	24334493	introns_24	0.888889	0	54	15	6.65127e-12	1.26145e-10	-0.888889
NM_025081	chr14	24407869	24408527	exons_3	0.0365854	0.977778	82	45	1.4539e-30	1.25477e-28	0.941192
NM_025081	chr14	24408652	24410208	exons_4	0.5625	0.939655	112	116	4.67824e-12	9.01808e-11	0.377155
NM_001290257	chr14	24437036	24441843	exons_1	1	0.516129	35	31	1.34259e-07	1.66616e-06	-0.483871
NM_001290292	chr14	24440927	24442177	introns_1	1	0.516129	35	31	1.34259e-07	1.66616e-06	-0.483871
NM_001290293	chr14	24440927	24442097	introns_1	1	0.516129	35	31	1.34259e-07	1.66616e-06	-0.483871
NM_020195	chr14	24441674	24441795	exons_1	1	0.516129	35	31	1.34259e-07	1.66616e-06	-0.483871
NM_002515	chr14	26443091	26448963	exons_1	0.866667	0.194444	30	36	1.21203e-08	1.65279e-07	-0.672222
NM_001366398	chr14	26443093	26448963	exons_1	0.866667	0.194444	30	36	1.21203e-08	1.65279e-07	-0.672222
NM_015382	chr14	31205797	31205957	exons_42	0.972973	0	37	20	4.91549e-16	1.34938e-14	-0.972973
NR_146544	chr14	31943852	31945852	promoters	1	0.285714	81	42	1.46439e-20	6.09984e-19	-0.714286
NR_146544	chr14	31944853	31945108	exons_1	1	0.285714	81	42	1.46439e-20	6.09984e-19	-0.714286
NM_004274	chr14	32545230	32546999	exons_4	0.0135135	0.988235	74	85	5.18291e-45	9.09634e-43	0.974722
NM_022123	chr14	32939367	33215181	introns_1	0.962567	0.482955	187	176	6.60173e-28	4.8135e-26	-0.479612
NM_001164749	chr14	32939367	33055904	introns_1	0.955224	0.637097	134	124	1.89369e-11	3.43716e-10	-0.318127
NM_001164749	chr14	33055995	33215181	introns_1	0.981132	0.115385	53	52	5.9834e-23	3.04957e-21	-0.865747
NM_001164749	chr14	33676386	33735213	introns_3	0.915663	0.689189	83	74	0.000247658	0.00210502	-0.226473
NM_021914	chr14	34712817	34714817	promoters	0.56701	0.0289855	97	69	2.37085e-15	6.06388e-14	-0.538025
NR_028130	chr14	34713137	34713396	introns_1	0.873016	0.0377358	63	53	1.27981e-22	6.353e-21	-0.83528
NR_028131	chr14	34713137	34713507	introns_1	0.873016	0.0377358	63	53	1.27981e-22	6.353e-21	-0.83528
NM_021914	chr14	34713254	34713561	exons_1	0.873016	0.0377358	63	53	1.27981e-22	6.353e-21	-0.83528
NM_032352	chr14	35831501	35832977	introns_2	0.977273	0.367347	44	49	1.34588e-11	2.47498e-10	-0.609926
NM_032352	chr14	35832978	35833105	exons_3	0.968	0.658537	125	82	8.8263e-10	1.33705e-08	-0.309463
NM_001171170	chr14	36814002	36874955	introns_9	0.714286	0.957447	35	47	0.00169432	0.0123001	0.243161
NM_002687	chr14	39176527	39176595	exons_3	0.903226	0.304348	31	23	2.63161e-06	2.86269e-05	-0.598878
NM_080746	chr14	46650781	46652781	promoters	0.675676	0	37	13	1.9052e-06	2.09258e-05	-0.675676
NM_080746	chr14	46651010	46651781	exons_1	0.675676	0	37	13	1.9052e-06	2.09258e-05	-0.675676
NM_002408	chr14	49620799	49623481	exons_1	0.56701	0.0147059	97	68	1.43189e-16	4.1422e-15	-0.552304
NM_014315	chr14	49768622	49771593	introns_1	0.911111	0.0731707	45	41	4.13004e-17	1.25717e-15	-0.83794
NR_131171	chr14	50052905	50089120	introns_7	0.245283	0.888889	53	45	2.23152e-11	4.01386e-10	0.643606
NM_006939	chr14	50130501	50130762	exons_4	0.633333	0.96875	30	32	0.000386729	0.00317762	0.335417
NM_024884	chr14	50302902	50303017	exons_2	1	0.232558	37	43	3.80391e-15	9.58887e-14	-0.767442
NM_020921	chr14	50773096	50776948	introns_12	0.974359	0.46	39	50	1.16071e-08	1.58953e-07	-0.514359
NM_001163940	chr14	50905557	50908270	introns_1	0.414634	0.952381	41	21	8.01107e-06	8.27258e-05	0.537747
NM_001042481	chr14	51570411	51689690	introns_1	0.148148	0.980392	108	51	6.55903e-27	4.49551e-25	0.832244
NR_051990	chr14	51598952	51600952	promoters	0.148148	0.980392	108	51	6.55903e-27	4.49551e-25	0.832244
NM_001161576	chr14	54568113	54702061	introns_1	1	0.75	40	16	0.00100141	0.00761164	-0.25
NM_199047	chr14	55439545	55441545	promoters	0.95098	0	102	32	1.7225e-27	1.23087e-25	-0.95098
NM_199047	chr14	55440396	55440545	exons_7	0.902439	0	41	14	4.6227e-11	7.98945e-10	-0.902439
NR_073034	chr14	56805576	56810158	introns_1	0.238095	0	63	58	3.47874e-06	3.72913e-05	-0.238095
NR_159373	chr14	57564377	57566474	introns_1	0.0588235	1	34	45	1.15088e-21	5.26443e-20	0.941176
NM_001001872	chr14	58139415	58152074	introns_3	0.625	1	160	66	1.63418e-12	3.28607e-11	0.375
NM_023001	chr14	58301580	58301690	exons_2	0.659091	1	44	41	1.83943e-06	2.02299e-05	0.340909
NM_001244192	chr14	58443954	58444175	exons_3	0.957983	0.531915	119	47	1.54345e-10	2.50937e-09	-0.426068
NR_165650	chr14	58634186	58640735	introns_1	0.660714	0.333333	112	72	1.20749e-05	0.000122253	-0.327381
NM_001355272	chr14	59966589	59966765	exons_11	0.958333	0.325581	48	43	1.2742e-11	2.34832e-10	-0.632752
NM_001355272	chr14	59974709	59977224	introns_13	1	0.774194	44	31	0.000250347	0.00212658	-0.225806
NM_001330177	chr14	60133970	60148221	exons_10	0.987013	0.771429	77	35	0.000152843	0.00134293	-0.215584
NM_022495	chr14	60133970	60134814	exons_1	0.987013	0.771429	77	35	0.000152843	0.00134293	-0.215584
NM_001322282	chr14	60150188	60153958	introns_1	0.484848	1	33	27	3.76443e-07	4.46762e-06	0.515152
NM_001322280	chr14	60152939	60153178	exons_1	0.484848	1	33	27	3.76443e-07	4.46762e-06	0.515152
NM_001177963	chr14	60734952	60796216	introns_1	1	0.703704	31	27	0.000211892	0.00181759	-0.296296
NM_020810	chr14	60979231	60979886	exons_4	0.984848	0.333333	66	33	1.23289e-13	2.75079e-12	-0.651515
NR_039985	chr14	61570761	61650961	introns_1	0.577465	0.973684	71	38	8.7029e-07	9.93338e-06	0.396219
NM_145171	chr14	63312835	63313116	exons_1	0.0285714	0.928571	35	42	2.93731e-18	9.93618e-17	0.9
NM_001282181	chr14	63371356	63376108	exons_1	1	0.730159	100	63	2.48655e-09	3.6266e-08	-0.269841
NM_001282180	chr14	63371364	63376108	exons_1	1	0.730159	100	63	2.48655e-09	3.6266e-08	-0.269841
NM_005956	chr14	64442054	64442165	exons_20	0.972222	0.432432	36	37	5.30816e-08	6.81531e-07	-0.53979
NM_182526	chr14	67470266	67473941	exons_1	0.974425	0.0185874	391	269	8.792e-166	3.07324e-162	-0.955837
NM_001348541	chr14	67470269	67473937	exons_1	0.974425	0.0185874	391	269	8.792e-166	3.07324e-162	-0.955837
NM_001348544	chr14	67470269	67473941	exons_1	0.974425	0.0185874	391	269	8.792e-166	3.07324e-162	-0.955837
NM_020715	chr14	67541994	67555824	introns_1	0.970588	0.611111	34	18	0.000670377	0.00525655	-0.359477
NM_001321810	chr14	68291981	68411423	introns_4	0.948052	0.677686	154	121	1.51895e-09	2.24345e-08	-0.270366
NM_001244701	chr14	68787655	68790492	exons_1	0.463415	0.0425532	41	47	1.21551e-06	1.35421e-05	-0.420861
NM_004926	chr14	68787663	68790492	exons_1	0.463415	0.0425532	41	47	1.21551e-06	1.35421e-05	-0.420861
NM_001244698	chr14	68789527	68790492	exons_1	0.463415	0.0425532	41	47	1.21551e-06	1.35421e-05	-0.420861
NM_003861	chr14	69075412	69091673	introns_3	0.5625	0.9	32	30	0.0020878	0.0147955	0.3375
NM_001161498	chr14	69527783	69527932	exons_12	0.0431655	0.959538	139	173	8.05459e-72	3.9748e-69	0.916372
NR_104122	chr14	70044215	70046323	exons_1	0.166667	0.571429	102	133	9.51454e-11	1.58372e-09	0.404762
NM_033262	chr14	70044217	70046323	exons_1	0.166667	0.571429	102	133	9.51454e-11	1.58372e-09	0.404762
NR_104122	chr14	70168485	70188378	introns_1	0.290323	0	31	45	2.27821e-05	0.000222612	-0.290323
NR_135825	chr14	70186107	70188107	promoters	0.290323	0	31	45	2.27821e-05	0.000222612	-0.290323
NM_001308160	chr14	70978649	71009633	introns_6	1	0.7	36	50	1.68196e-05	0.000167343	-0.3
NM_014982	chr14	70988567	70988699	exons_1	1	0.7	36	50	1.68196e-05	0.000167343	-0.3
NM_001204423	chr14	72472872	72472953	exons_7	1	0.55	27	20	1.80783e-05	0.000178889	-0.45
NM_181341	chr14	72940378	72945883	introns_1	1	0.294118	39	17	8.70305e-10	1.31933e-08	-0.705882
NM_001352448	chr14	72942994	72943096	exons_2	1	0.294118	39	17	8.70305e-10	1.31933e-08	-0.705882
NR_135248	chr14	73244018	73245244	exons_1	0	0.966667	29	30	1.29274e-17	4.12046e-16	0.966667
NM_001365906	chr14	73244644	73244759	exons_1	0	0.966667	29	30	1.29274e-17	4.12046e-16	0.966667
NM_001367710	chr14	73715122	73719008	exons_1	0.454082	0.123377	196	154	5.67086e-12	1.08123e-10	-0.330705
NM_194278	chr14	73715122	73719501	exons_1	0.454082	0.123377	196	154	5.67086e-12	1.08123e-10	-0.330705
NM_194278	chr14	73740256	73759762	introns_1	0.175824	0.909091	91	33	1.7349e-14	4.14892e-13	0.733267
NM_001043318	chr14	73740256	73787101	introns_1	0.396825	0.947368	126	57	3.39581e-14	7.96649e-13	0.550543
NM_001039479	chr14	74692329	74712932	introns_19	0.758621	0.347826	29	23	0.00258855	0.017797	-0.410795
NR_169190	chr14	74862528	74864008	exons_2	0.478873	0.933333	71	75	2.32085e-10	3.68891e-09	0.45446
NM_001080408	chr14	74863103	74864008	exons_1	0.478873	0.933333	71	75	2.32085e-10	3.68891e-09	0.45446
NR_045209	chr14	74889275	74889349	exons_1	0.681818	1	44	14	0.00260427	0.0178933	0.318182
NR_033814	chr14	74889277	74889349	exons_1	0.681818	1	44	14	0.00260427	0.0178933	0.318182
NM_001207012	chr14	74942734	74946378	introns_1	0.0229885	0.964706	87	85	5.91031e-44	9.95638e-42	0.941717
NM_001293643	chr14	74946276	74946378	introns_2	0.0229885	0.964706	87	85	5.91031e-44	9.95638e-42	0.941717
NM_001329238	chr14	75124224	75126904	introns_1	1	0.14	60	50	5.13422e-25	3.18109e-23	-0.86
NM_033116	chr14	75124224	75126702	introns_1	1	0.14	60	50	5.13422e-25	3.18109e-23	-0.86
NM_015072	chr14	75782574	75783146	introns_25	1	0	31	17	2.80489e-15	7.14787e-14	-1
NM_001364172	chr14	77139213	77139752	exons_2	0.698529	0	136	112	1.83373e-37	2.22306e-35	-0.698529
NM_001366425	chr14	78242391	78243802	exons_2	0.646154	0.975	65	40	1.26777e-05	0.000127924	0.328846
NM_000369	chr14	81142940	81146306	exons_2	0.616438	0.977778	73	90	3.68694e-10	5.76847e-09	0.361339
NM_001366850	chr14	81276901	81278739	exons_2	0.222222	0.958333	27	24	1.01141e-08	1.39325e-07	0.736111
NM_001366850	chr14	81427213	81436320	introns_1	0.833333	0.0666667	48	15	2.69661e-08	3.55088e-07	-0.766667
NM_001346146	chr14	85530280	85621138	introns_1	0.707692	0.44	130	150	5.51729e-06	5.78281e-05	-0.267692
NR_144386	chr14	85530535	85561189	introns_1	0.433333	0	60	61	3.60768e-11	6.34231e-10	-0.433333
NM_013231	chr14	85530535	85621138	introns_1	0.707692	0.44	130	150	5.51729e-06	5.78281e-05	-0.267692
NM_001346144	chr14	85530557	85621138	introns_1	0.707692	0.44	130	150	5.51729e-06	5.78281e-05	-0.267692
NR_144387	chr14	85531223	85552732	introns_1	0.433333	0	60	61	3.60768e-11	6.34231e-10	-0.433333
NM_001346145	chr14	85531784	85621138	introns_1	0.707692	0.44	130	150	5.51729e-06	5.78281e-05	-0.267692
NR_144385	chr14	85533994	85561189	introns_1	0.433333	0	60	61	3.60768e-11	6.34231e-10	-0.433333
NM_001346143	chr14	85533994	85621138	introns_1	0.707692	0.44	130	150	5.51729e-06	5.78281e-05	-0.267692
NM_001346145	chr14	85621139	85628696	exons_1	0.8	0.0986547	220	223	2.76067e-55	7.14809e-53	-0.701345
NM_001346146	chr14	85621139	85654428	exons_1	0.8	0.0986547	220	223	2.76067e-55	7.14809e-53	-0.701345
NR_046094	chr14	88025482	88084036	introns_2	0.641026	0.92	39	25	0.00762279	0.0459669	0.278974
NM_007039	chr14	88478920	88480352	exons_7	0.735	0	200	123	1.95904e-48	3.91304e-46	-0.735
NM_183387	chr14	88664493	88664624	exons_6	0.918367	0.307692	49	13	8.07133e-06	8.32866e-05	-0.610675
NR_036500	chr14	89417797	89419159	introns_1	1	0.722222	46	18	0.000200871	0.0017312	-0.277778
NM_001348437	chr14	91232532	91235179	exons_1	0.628141	0.0271318	398	258	9.0374e-65	3.29637e-62	-0.601009
NM_001080414	chr14	91303979	91305764	introns_11	0.965517	0.230769	29	39	5.75433e-11	9.81583e-10	-0.734748
NM_001378620	chr14	92433989	92439334	introns_4	1	0.705882	33	34	9.29367e-05	0.000842153	-0.294118
NM_001346218	chr14	93431052	93467670	introns_1	0.608108	0.964286	74	56	2.68684e-07	3.24043e-06	0.356178
NM_020818	chr14	93621621	93622841	exons_1	0.970588	0.193182	68	88	5.36834e-26	3.50203e-24	-0.777406
NM_020818	chr14	93690304	93691748	introns_17	0.977273	0.238095	44	42	1.67897e-14	4.02895e-13	-0.739177
NM_001207071	chr14	93918995	93928198	introns_1	0.207547	0.755102	53	49	1.27887e-08	1.73716e-07	0.547555
NM_138344	chr14	93925371	93928198	introns_1	0.207547	0.755102	53	49	1.27887e-08	1.73716e-07	0.547555
NM_001207074	chr14	93926343	93928343	promoters	0.207547	0.755102	53	49	1.27887e-08	1.73716e-07	0.547555
NM_001207074	chr14	93927400	93928198	introns_1	0.207547	0.755102	53	49	1.27887e-08	1.73716e-07	0.547555
NM_001207073	chr14	93927455	93928198	introns_1	0.207547	0.755102	53	49	1.27887e-08	1.73716e-07	0.547555
NM_001207072	chr14	93927627	93928198	introns_1	0.207547	0.755102	53	49	1.27887e-08	1.73716e-07	0.547555
NR_015340	chr14	94639724	94641724	promoters	0.380952	1	42	19	1.64507e-07	2.02358e-06	0.619048
NR_015340	chr14	94641301	94641900	exons_2	0.380952	1	42	19	1.64507e-07	2.02358e-06	0.619048
NR_132399	chr14	95876540	95922780	introns_1	0.669065	0.977778	139	135	5.29445e-13	1.11096e-11	0.308713
NR_038861	chr14	95877178	95922780	introns_1	0.669065	0.977778	139	135	5.29445e-13	1.11096e-11	0.308713
NR_132398	chr14	95895944	95922780	introns_2	0.443038	0.974684	79	79	1.6387e-15	4.28874e-14	0.531646
NM_018036	chr14	96331376	96331637	exons_32	0.974093	0.526316	193	95	6.46143e-21	2.78838e-19	-0.447777
NM_001350892	chr14	96486898	96487056	exons_3	0.3125	0.933333	32	15	2.16638e-05	0.000212664	0.620833
NM_001329411	chr14	99604616	99624761	introns_1	0.142857	1	35	43	4.18678e-18	1.40047e-16	0.857143
NM_004434	chr14	99917850	99920788	introns_3	0.74359	1	78	20	0.0012795	0.00952442	0.25641
NM_001385092	chr14	100537147	100539297	exons_1	0.439024	0.0769231	41	39	0.000124364	0.00110779	-0.362101
NM_020836	chr14	100537147	100539315	exons_1	0.439024	0.0769231	41	39	0.000124364	0.00110779	-0.362101
NR_024096	chr14	100657711	100671560	introns_1	0.691176	0.214286	68	56	6.04823e-08	7.73001e-07	-0.476891
NM_001134888	chr14	100879753	100884874	exons_1	0.941624	0.0634006	394	347	4.79651e-151	1.34129e-147	-0.878224
NR_029965	chr14	100880006	100882006	promoters	0.907692	0.239437	65	71	1.28921e-16	3.74756e-15	-0.668256
NR_029966	chr14	100880885	100882885	promoters	0.951049	0.132867	143	143	3.42199e-51	7.32342e-49	-0.818182
NR_029696	chr14	100881978	100883978	promoters	0.950685	0.0155763	365	321	2.50058e-166	1.16544e-162	-0.935109
NR_146000	chr14	100899086	100906097	introns_1	0.933333	0.402439	150	82	5.95017e-19	2.13687e-17	-0.530894
NM_001134888	chr14	100902722	100904722	promoters	0.910112	0.0208333	89	48	3.74637e-28	2.75693e-26	-0.889279
NM_001161725	chr14	101925141	101927991	exons_2	0.9375	0.413793	48	29	2.73439e-07	3.29305e-06	-0.523707
NM_001161726	chr14	101925141	101927977	exons_1	0.9375	0.413793	48	29	2.73439e-07	3.29305e-06	-0.523707
NM_001267827	chr14	102317667	102325984	introns_1	0.822785	0	79	40	2.2167e-21	9.83935e-20	-0.822785
NM_001385069	chr14	102317667	102325518	introns_1	0.822785	0	79	40	2.2167e-21	9.83935e-20	-0.822785
NM_001385074	chr14	102317667	102325991	introns_1	0.822785	0	79	40	2.2167e-21	9.83935e-20	-0.822785
NM_001267828	chr14	102319519	102325984	introns_1	0.822785	0	79	40	2.2167e-21	9.83935e-20	-0.822785
NM_001385065	chr14	102320054	102325984	introns_1	0.822785	0	79	40	2.2167e-21	9.83935e-20	-0.822785
NR_169565	chr14	102320054	102325991	introns_1	0.822785	0	79	40	2.2167e-21	9.83935e-20	-0.822785
NR_169567	chr14	102320471	102322232	introns_1	0.822785	0	79	40	2.2167e-21	9.83935e-20	-0.822785
NR_169568	chr14	102320471	102325984	introns_1	0.822785	0	79	40	2.2167e-21	9.83935e-20	-0.822785
NM_152326	chr14	102501768	102507942	exons_1	0.45614	0	57	19	1.26107e-05	0.000127309	-0.45614
NM_001077594	chr14	103105073	103106784	introns_6	0.0444444	0.666667	45	24	1.32754e-08	1.80036e-07	0.622222
NM_183004	chr14	103336036	103336117	exons_3	0.910714	0.0805369	112	149	6.93112e-47	1.29791e-44	-0.830177
NM_015316	chr14	103797519	103847298	introns_16	0.953125	0.321429	64	28	9.95427e-11	1.65363e-09	-0.631696
NM_001080464	chr14	104093491	104093602	exons_3	0.238095	0.95	42	20	1.85e-08	2.4682e-07	0.711905
NR_146612	chr14	104223817	104287485	introns_1	0.973333	0.567568	75	37	5.06368e-08	6.51338e-07	-0.405766
NR_146613	chr14	104223817	104275343	introns_1	0.973333	0.567568	75	37	5.06368e-08	6.51338e-07	-0.405766
NM_152328	chr14	104723228	104725228	promoters	0.0689655	0.44186	116	86	1.99386e-10	3.19826e-09	0.372895
NR_002224	chr14	105969729	105970994	exons_1	0.978723	0.770833	47	48	0.00106054	0.00802843	-0.20789
NM_001008892	chr15	22838922	22851638	introns_1	0.977273	0	44	16	3.46364e-15	8.75215e-14	-0.977273
NM_001184888	chr15	22838948	22845145	introns_1	0.977273	0	44	16	3.46364e-15	8.75215e-14	-0.977273
NM_001008860	chr15	22839791	22851638	introns_1	0.977273	0	44	16	3.46364e-15	8.75215e-14	-0.977273
NM_001184889	chr15	22839791	22843101	introns_1	0.977273	0	44	16	3.46364e-15	8.75215e-14	-0.977273
NM_030922	chr15	22839791	22845145	introns_1	0.977273	0	44	16	3.46364e-15	8.75215e-14	-0.977273
NM_001324126	chr15	22943355	22944861	introns_1	0.956522	0.527778	46	36	2.0698e-06	2.26447e-05	-0.428744
NM_001324124	chr15	22944558	22944659	exons_1	0.956522	0.527778	46	36	2.0698e-06	2.26447e-05	-0.428744
NM_033223	chr15	27527433	27527629	exons_3	0.978947	0.133333	95	60	5.8165e-31	5.19104e-29	-0.845614
NM_015307	chr15	29128865	29136365	introns_4	0.6	0.909091	45	44	0.000487321	0.00391743	0.309091
NM_001252020	chr15	31047111	31047251	exons_13	1	0.684211	30	38	6.40785e-05	0.000593734	-0.315789
NM_001382637	chr15	31487452	31487566	exons_3	0	0.840909	40	44	1.99265e-18	6.81205e-17	0.840909
NM_001243996	chr15	33788459	33800769	introns_67	0.346939	1	49	20	1.51838e-08	2.042e-07	0.653061
NM_001042497	chr15	34261021	34336409	introns_1	0.514563	0.987342	103	79	2.68699e-15	6.85574e-14	0.472779
NM_001042494	chr15	34275390	34336409	introns_1	0.514563	0.987342	103	79	2.68699e-15	6.85574e-14	0.472779
NM_005135	chr15	34317820	34319820	promoters	0.294118	1	68	34	1.87373e-14	4.47583e-13	0.705882
NR_038251	chr15	35546474	35711706	introns_1	1	0.638554	71	83	4.75628e-11	8.21016e-10	-0.361446
NM_001130010	chr15	36579962	36644277	introns_1	0.243478	0.968421	115	95	1.14988e-30	9.9449e-29	0.724943
NM_001321756	chr15	36579962	36645222	introns_1	0.243478	0.968421	115	95	1.14988e-30	9.9449e-29	0.724943
NM_001321758	chr15	36579962	36654097	introns_1	0.243478	0.968421	115	95	1.14988e-30	9.9449e-29	0.724943
NM_001290232	chr15	36594919	36644277	introns_1	0.243478	0.968421	115	95	1.14988e-30	9.9449e-29	0.724943
NM_032499	chr15	36594919	36640604	introns_1	0.243478	0.968421	115	95	1.14988e-30	9.9449e-29	0.724943
NM_033510	chr15	40357218	40359218	promoters	0.438356	0.112903	73	62	1.69087e-05	0.000168189	-0.325453
NM_033510	chr15	40358441	40363624	introns_1	0.730769	0.476636	156	107	2.87301e-05	0.000277357	-0.254134
NM_033286	chr15	40381720	40383720	promoters	0.115385	1	26	35	3.03938e-15	7.71264e-14	0.884615
NM_001382436	chr15	40554128	40557215	introns_1	0.985294	0.740741	68	54	1.51092e-05	0.000151331	-0.244553
NM_133639	chr15	40872214	40873501	exons_1	0.915888	0.00591716	214	169	7.39807e-88	7.38856e-85	-0.909971
NM_133639	chr15	40873234	40875234	promoters	0.883333	0	60	37	1.93915e-21	8.74617e-20	-0.883333
NM_002220	chr15	41502504	41502787	introns_5	0.305556	0	36	25	0.000271892	0.00229426	-0.305556
NM_178034	chr15	42083780	42085095	introns_14	0.242647	0.7125	136	80	8.23352e-12	1.54318e-10	0.469853
NM_024344	chr15	42399653	42401640	introns_5	0.0681818	1	44	20	4.02571e-15	1.01297e-13	0.931818
NM_173088	chr15	42401389	42403389	promoters	0.44	0.968254	75	63	5.14538e-13	1.08293e-11	0.528254
NM_004245	chr15	43256687	43260399	introns_10	0.96875	0.025974	96	77	7.38043e-44	1.22363e-41	-0.942776
NM_201631	chr15	43260052	43260297	exons_1	0.96875	0.025974	96	77	7.38043e-44	1.22363e-41	-0.942776
NM_001301146	chr15	44736711	44756367	introns_1	0.941176	0	34	20	2.92468e-14	6.90369e-13	-0.941176
NM_182985	chr15	44754900	44755376	exons_1	0.941176	0	34	20	2.92468e-14	6.90369e-13	-0.941176
NM_001330286	chr15	48330094	48332094	promoters	0.903846	0	52	42	5.69162e-23	2.90439e-21	-0.903846
NM_000138	chr15	48427774	48428345	introns_9	0.85	0.2	60	45	5.0968e-12	9.79342e-11	-0.65
NM_203349	chr15	48834769	48835022	exons_2	0.551282	1	78	72	8.5593e-14	1.93755e-12	0.448718
NR_073598	chr15	49858238	49860475	exons_1	0.216216	0.947761	185	134	5.7602e-44	9.78208e-42	0.731545
NM_001306146	chr15	50258518	50263234	introns_7	0.238095	0.928571	63	42	1.40246e-13	3.11257e-12	0.690476
NM_203494	chr15	50545666	50547666	promoters	1	0.392857	41	28	3.23456e-10	5.07963e-09	-0.607143
NM_203494	chr15	50546473	50546666	exons_7	1	0.392857	41	28	3.23456e-10	5.07963e-09	-0.607143
NM_000103	chr15	51212320	51212561	exons_2	0.948718	0.5625	39	32	5.90259e-05	0.00054959	-0.386218
NM_014547	chr15	51828652	51830652	promoters	0.969231	0.0540541	65	37	1.38287e-23	7.6626e-22	-0.915177
NR_147181	chr15	53129239	53129698	exons_3	0.282051	0.977778	39	45	4.82277e-13	1.01707e-11	0.695726
NM_001329212	chr15	55874009	55924645	introns_1	0.942857	0.205882	35	34	3.30678e-11	5.83535e-10	-0.736975
NM_001284338	chr15	55915284	55917136	exons_1	0.942857	0.205882	35	34	3.30678e-11	5.83535e-10	-0.736975
NM_198400	chr15	55915284	55917131	exons_1	0.942857	0.205882	35	34	3.30678e-11	5.83535e-10	-0.736975
NM_198400	chr15	55916131	55918131	promoters	0.942857	0.205882	35	34	3.30678e-11	5.83535e-10	-0.736975
NM_001284338	chr15	55916136	55918136	promoters	0.942857	0.205882	35	34	3.30678e-11	5.83535e-10	-0.736975
NM_001252335	chr15	57376568	57421135	introns_1	0.682927	1	41	33	2.77569e-05	0.000268332	0.317073
NM_032866	chr15	57376568	57437984	introns_1	0.682927	1	41	33	2.77569e-05	0.000268332	0.317073
NR_104367	chr15	57684675	57691898	introns_1	1	0.625	32	24	2.69675e-05	0.000261423	-0.375
NR_104371	chr15	57684675	57701552	introns_1	1	0.625	32	24	2.69675e-05	0.000261423	-0.375
NM_024755	chr15	58917000	58932355	introns_2	0.702703	0	37	34	3.75832e-12	7.30861e-11	-0.702703
NR_135043	chr15	58917000	58933403	introns_1	0.702703	0	37	34	3.75832e-12	7.30861e-11	-0.702703
NM_001379429	chr15	65075667	65077667	promoters	0	0.631579	28	19	9.89935e-08	1.25023e-06	0.631579
NM_001101362	chr15	65075745	65077745	promoters	0	0.631579	28	19	9.89935e-08	1.25023e-06	0.631579
NM_020962	chr15	65392134	65392370	exons_10	0	0.939024	58	82	1.38806e-35	1.54439e-33	0.939024
NM_133375	chr15	66323493	66323585	exons_4	0.677632	0.956522	152	115	1.4292e-09	2.11461e-08	0.27889
NR_002440	chr15	66501910	66503910	promoters	0.974359	0.617978	78	89	1.11407e-09	1.66896e-08	-0.356381
NR_002441	chr15	66502314	66504314	promoters	0.974359	0.617978	78	89	1.11407e-09	1.66896e-08	-0.356381
NM_000968	chr15	66503358	66503529	exons_1	0.974359	0.617978	78	89	1.11407e-09	1.66896e-08	-0.356381
NM_005585	chr15	66716499	66780996	introns_1	0.785714	1	28	22	0.0058497	0.0365463	0.214286
NR_027654	chr15	66717141	66780996	introns_2	0.785714	1	28	22	0.0058497	0.0365463	0.214286
NM_001004439	chr15	68311290	68311403	exons_6	0.757576	0.973684	33	38	0.00422948	0.0274798	0.216108
NM_001324015	chr15	68645361	68695139	introns_2	0.368421	1	38	43	3.42296e-12	6.70305e-11	0.631579
NM_005078	chr15	70047791	70050204	exons_1	0.946667	0.643678	75	87	7.31773e-07	8.41649e-06	-0.302989
NM_014249	chr15	71809553	71811553	promoters	0.363636	0.975309	99	81	1.13062e-20	4.76634e-19	0.611672
NM_014249	chr15	71811483	71811609	exons_2	0.363636	0.975309	99	81	1.13062e-20	4.76634e-19	0.611672
NM_001042367	chr15	73473922	73540484	introns_1	0.939394	0.631579	33	19	0.00517224	0.0328023	-0.307815
NM_001039614	chr15	73750975	73751697	exons_1	0.148148	0.595238	27	42	0.000136497	0.00120996	0.44709
NM_001384351	chr15	73750975	73751862	exons_1	0.148148	0.595238	27	42	0.000136497	0.00120996	0.44709
NM_001303254	chr15	73751098	73752109	introns_1	0.0666667	0.362319	60	69	2.52105e-05	0.000245128	0.295652
NM_021819	chr15	74816535	74816631	introns_3	0.914286	0.0465116	35	43	5.38023e-17	1.61893e-15	-0.867774
NM_001030005	chr15	74825626	74827626	promoters	0.777778	0.030303	54	33	1.61459e-13	3.55514e-12	-0.747475
NM_001030005	chr15	74826868	74828033	introns_1	0.777778	0.030303	54	33	1.61459e-13	3.55514e-12	-0.747475
NR_106942	chr15	74839707	74841707	promoters	0.971429	0.75	35	36	0.00430078	0.0278912	-0.221429
NM_001099436	chr15	74840234	74840316	exons_1	0.971429	0.75	35	36	0.00430078	0.0278912	-0.221429
NR_104307	chr15	74840234	74840641	exons_1	0.971429	0.75	35	36	0.00430078	0.0278912	-0.221429
NM_006715	chr15	75367511	75367634	exons_5	0.0625	0.388889	32	18	0.00437859	0.0282865	0.326389
NM_006715	chr15	75367607	75369607	promoters	0.0625	0.388889	32	18	0.00437859	0.0282865	0.326389
NM_001304504	chr15	77478295	77478510	exons_4	0.647059	1	51	39	1.0419e-06	1.17325e-05	0.352941
NM_032808	chr15	77615901	77632309	introns_1	0.68	0.969697	50	33	0.000403803	0.00330431	0.289697
NM_015079	chr15	78054188	78077292	introns_11	0.6	0.027027	45	37	2.52107e-09	3.67566e-08	-0.572973
NM_001330675	chr15	78542220	78542575	introns_1	0.972222	0.551724	36	29	1.52991e-05	0.000153196	-0.420498
NM_000745	chr15	78589805	78590636	exons_5	0.585366	1	41	41	1.17291e-07	1.46556e-06	0.414634
NM_001307945	chr15	78589850	78593091	introns_1	0.585366	1	41	41	1.17291e-07	1.46556e-06	0.414634
NM_000743	chr15	78601253	78602264	exons_1	0.648649	0.956522	37	23	0.00270985	0.0185609	0.307873
NM_001145648	chr15	79027860	79031399	introns_5	0.897436	0.0833333	39	12	6.82353e-08	8.71028e-07	-0.814103
NM_001145648	chr15	79046746	79046999	exons_9	0.0238095	0.949153	84	59	1.35446e-34	1.44934e-32	0.925343
NR_033833	chr15	80287854	80341555	introns_2	0.954545	0.738095	44	42	0.00359709	0.0237762	-0.21645
NM_018689	chr15	80937794	80937979	exons_23	0.734694	0.982456	98	57	8.13571e-06	8.39096e-05	0.247762
NM_001348441	chr15	82661675	82663675	promoters	0.704225	0.446154	71	65	0.00219437	0.0154155	-0.258072
NM_004644	chr15	82663234	82663559	introns_3	0.704225	0.446154	71	65	0.00219437	0.0154155	-0.258072
NM_001301110	chr15	83892889	83897857	introns_13	1	0	38	39	5.09713e-25	3.16747e-23	-1
NM_001270546	chr15	85682158	85682212	exons_3	0.382353	0.970588	34	34	2.14875e-08	2.85136e-07	0.588235
NM_152336	chr15	86674437	86987986	introns_6	0	0.888889	41	36	5.01288e-19	1.82844e-17	0.888889
NM_001375812	chr15	87859751	87877120	exons_1	0.644444	0.952381	90	42	3.05224e-05	0.000293915	0.307937
NM_001243101	chr15	87876757	87877120	exons_1	0.644444	0.952381	90	42	3.05224e-05	0.000293915	0.307937
NM_001113378	chr15	89244034	89247628	introns_1	0.916667	0.538462	60	39	1.25698e-05	0.000126929	-0.378205
NM_001376910	chr15	89244045	89247628	introns_1	0.916667	0.538462	60	39	1.25698e-05	0.000126929	-0.378205
NR_160724	chr15	89410702	89419457	introns_2	0.92562	0.277778	121	72	1.03797e-21	4.774e-20	-0.647842
NM_001143785	chr15	90885259	90886960	introns_1	0.173077	0.952381	52	21	8.50331e-11	1.42274e-09	0.779304
NM_002005	chr15	90885586	90886960	introns_2	0.173077	0.952381	52	21	8.50331e-11	1.42274e-09	0.779304
NM_001289149	chr15	91005120	91005379	introns_9	1	0.764706	32	17	0.00247607	0.0171134	-0.235294
NM_001323031	chr15	91099691	91225872	introns_1	0.302326	0.0679612	172	103	9.69832e-07	1.09651e-05	-0.234364
NM_001167580	chr15	91100364	91251818	introns_1	0.302326	0.0679612	172	103	9.69832e-07	1.09651e-05	-0.234364
NM_001323034	chr15	91100364	91225872	introns_1	0.302326	0.0679612	172	103	9.69832e-07	1.09651e-05	-0.234364
NM_001323036	chr15	91101099	91251818	introns_1	0.379562	0.0985915	137	71	6.0417e-06	6.3151e-05	-0.28097
NM_001323038	chr15	91101099	91225872	introns_1	0.379562	0.0985915	137	71	6.0417e-06	6.3151e-05	-0.28097
NM_001323039	chr15	91102321	91225872	introns_1	0.981132	0.4375	53	16	5.02571e-07	5.88686e-06	-0.543632
NM_001323040	chr15	91128811	91251818	introns_1	0.981132	0.4375	53	16	5.02571e-07	5.88686e-06	-0.543632
NM_014848	chr15	91128811	91225872	introns_1	0.981132	0.4375	53	16	5.02571e-07	5.88686e-06	-0.543632
NM_001323039	chr15	91292369	91302565	exons_3	0.607143	0.166667	28	18	0.00236269	0.0164272	-0.440476
NM_001271	chr15	92924321	92924552	exons_1	0.229167	0.916667	48	48	6.06631e-13	1.26785e-11	0.6875
NR_120323	chr15	93906290	93983785	introns_1	0.478261	0.974359	46	39	4.31655e-08	5.57972e-07	0.496098
NR_120320	chr15	93975407	93982892	introns_1	0.478261	0.974359	46	39	4.31655e-08	5.57972e-07	0.496098
NM_001385008	chr15	94231665	94298200	introns_1	1	0.742857	38	35	0.000131742	0.00116904	-0.257143
NM_001385010	chr15	94231665	94314281	introns_1	1	0.742857	38	35	0.000131742	0.00116904	-0.257143
NR_169530	chr15	94231665	94278153	introns_1	1	0.742857	38	35	0.000131742	0.00116904	-0.257143
NM_001385002	chr15	94232006	94278153	introns_1	1	0.742857	38	35	0.000131742	0.00116904	-0.257143
NM_001385003	chr15	94232006	94298200	introns_1	1	0.742857	38	35	0.000131742	0.00116904	-0.257143
NM_001385008	chr15	94370181	94384021	introns_1	1	0.315789	37	19	1.18821e-09	1.77054e-08	-0.684211
NR_169529	chr15	94378039	94384021	introns_2	1	0.315789	37	19	1.18821e-09	1.77054e-08	-0.684211
NR_102743	chr15	96285460	96288663	introns_5	0.960317	0.696429	126	56	1.33143e-06	1.47903e-05	-0.263889
NR_102744	chr15	96290784	96327198	introns_1	0.117371	0.326446	213	242	5.91704e-08	7.56465e-07	0.209075
NR_125738	chr15	96290784	96326955	introns_1	0.117371	0.326446	213	242	5.91704e-08	7.56465e-07	0.209075
NM_001291858	chr15	98649676	98707561	introns_1	0.55	0.276596	100	94	9.95383e-05	0.00089655	-0.273404
NR_126453	chr15	98650221	98652221	promoters	0.290323	0	62	67	5.42145e-08	6.95863e-07	-0.290323
NM_001284420	chr15	99729732	99733344	introns_1	0.932331	0.011236	133	89	2.20262e-51	4.73801e-49	-0.921095
NM_152449	chr15	99731718	99732007	exons_1	0.932331	0.011236	133	89	2.20262e-51	4.73801e-49	-0.921095
NM_000693	chr15	100900575	100900759	exons_2	0.612903	0.980392	31	51	6.0198e-06	6.29535e-05	0.367489
NM_024652	chr15	101008837	101009063	exons_7	0.953125	0	64	74	8.14576e-38	1.01389e-35	-0.953125
NM_024652	chr15	101053223	101053420	exons_26	1	0.444444	28	18	1.28916e-06	1.43473e-05	-0.555556
NM_025141	chr15	101650162	101652270	introns_1	1	0.368421	65	19	3.47117e-11	6.11002e-10	-0.631579
NM_078474	chr15	101650162	101651695	introns_1	1	0.368421	65	19	3.47117e-11	6.11002e-10	-0.631579
NM_022450	chr16	60439	60539	exons_7	0.971429	0.615385	35	13	0.0017788	0.0128578	-0.356044
NM_022450	chr16	61120	61281	exons_8	1	0.0833333	27	24	7.36205e-14	1.67558e-12	-0.916667
NM_022450	chr16	61585	61696	exons_10	0.375	0	24	13	0.0022923	0.0160068	-0.375
NM_022450	chr16	71631	73631	promoters	0	0.90625	55	32	1.55678e-21	7.07483e-20	0.90625
NM_000558	chr16	175679	177679	promoters	0.977444	0	133	50	1.43715e-43	2.3548e-41	-0.977444
NM_000558	chr16	177283	177522	exons_3	0.977444	0	133	50	1.43715e-43	2.3548e-41	-0.977444
NM_145294	chr16	649991	650167	exons_3	0.238095	0.030303	42	33	0.00629227	0.0390721	-0.207792
NM_001323920	chr16	683334	685334	promoters	0.380597	0	134	45	2.1084e-09	3.08688e-08	-0.380597
NM_001323920	chr16	683685	683781	exons_2	0.471264	0	87	33	6.13226e-09	8.64036e-08	-0.471264
NM_014587	chr16	984701	986979	exons_3	0.112745	0.959538	204	173	1.23998e-71	6.04795e-69	0.846792
NM_003933	chr16	1343393	1343513	exons_4	0.972973	0	37	32	1.52337e-20	6.33921e-19	-0.972973
NM_003933	chr16	1343514	1344021	introns_5	0.912281	0.09375	114	64	6.24575e-30	5.18781e-28	-0.818531
NM_001351846	chr16	1495624	1497035	introns_2	0.934783	0.210526	46	19	3.35489e-09	4.84921e-08	-0.724256
NM_014714	chr16	1526797	1557934	introns_12	0.26087	0.944444	46	18	1.46834e-07	1.81096e-06	0.683575
NM_001256541	chr16	1542077	1554781	introns_2	0.26087	0.944444	46	18	1.46834e-07	1.81096e-06	0.683575
NM_144570	chr16	1678357	1685438	introns_1	0.447368	0.863636	38	22	0.000921733	0.00706561	0.416268
NM_152764	chr16	1857735	1857930	exons_6	0.263158	0.0322581	38	31	0.00493023	0.0314386	-0.2309
NM_001009606	chr16	1911475	1912205	exons_1	0.607143	0.978495	56	93	1.06861e-09	1.60601e-08	0.371352
NM_005061	chr16	1953043	1953955	introns_8	0.125	1	32	16	1.45433e-10	2.37183e-09	0.875
NM_005061	chr16	1953689	1955689	promoters	0.125	1	32	16	1.45433e-10	2.37183e-09	0.875
NR_002327	chr16	1961466	1963466	promoters	0.129032	0.818182	62	44	1.57987e-13	3.4893e-12	0.68915
NR_002326	chr16	1962106	1964106	promoters	0.129032	0.818182	62	44	1.57987e-13	3.4893e-12	0.68915
NM_002952	chr16	1962910	1963148	introns_2	0.129032	0.818182	62	44	1.57987e-13	3.4893e-12	0.68915
NR_002326	chr16	1962973	1963106	exons_1	0.266667	0.777778	30	27	7.81641e-05	0.000716806	0.511111
NM_032271	chr16	2155859	2163882	introns_1	0.545455	0.295455	99	88	0.00051087	0.00410045	-0.25
NM_020764	chr16	2195605	2197605	promoters	0.707317	0.0833333	41	12	6.03922e-05	0.000560818	-0.623984
NM_001352060	chr16	2206358	2206659	exons_1	0.972973	0.025	74	40	3.46955e-28	2.55771e-26	-0.947973
NM_001352057	chr16	2206479	2206659	exons_1	0.972973	0.025	74	40	3.46955e-28	2.55771e-26	-0.947973
NM_001199175	chr16	2206497	2206659	exons_1	0.972973	0.025	74	40	3.46955e-28	2.55771e-26	-0.947973
NM_006181	chr16	2472985	2473134	exons_3	0.526316	0.808511	38	47	0.00527409	0.0333424	0.282195
NM_001385462	chr16	2785002	2785171	exons_2	0.866667	0	30	33	3.71479e-15	9.36984e-14	-0.866667
NM_001385462	chr16	2785172	2785374	introns_2	0.833333	0	102	52	6.62134e-28	4.8135e-26	-0.833333
NR_169625	chr16	2785172	2785798	introns_1	0.833333	0	102	52	6.62134e-28	4.8135e-26	-0.833333
NR_026864	chr16	2840148	2842751	exons_2	0.916667	0.607143	48	28	0.00122876	0.00917588	-0.309524
NM_020982	chr16	3011922	3013922	promoters	0.589744	0.980392	39	51	7.11673e-07	8.19655e-06	0.390649
NM_016639	chr16	3021555	3021689	exons_3	0.275862	0	29	35	0.000176653	0.00153732	-0.275862
NM_001103175	chr16	3029740	3030448	introns_5	0.954545	0	44	27	4.22491e-19	1.54437e-17	-0.954545
NR_123723	chr16	3058370	3060370	promoters	0.882353	0	34	18	1.05621e-11	1.96383e-10	-0.882353
NM_022468	chr16	3058827	3060723	exons_1	0.882353	0	34	18	1.05621e-11	1.96383e-10	-0.882353
NM_001042428	chr16	3116548	3118904	introns_3	0.978022	0.25	91	44	1.98711e-20	8.19581e-19	-0.728022
NM_001198536	chr16	3249781	3256310	introns_1	0.963235	0.00862069	136	116	5.38686e-66	2.01747e-63	-0.954615
NM_000243	chr16	3254158	3254790	exons_1	0.963235	0.00862069	136	116	5.38686e-66	2.01747e-63	-0.954615
NM_001079846	chr16	3851010	3879831	introns_3	0.357143	0	28	21	0.000296795	0.00249137	-0.357143
NM_001116	chr16	4113750	4115485	exons_10	0.726415	0.0461538	212	130	5.23038e-40	7.3622e-38	-0.680261
NM_001098814	chr16	4204635	4242006	introns_5	0.770115	1	87	79	1.02425e-07	1.29134e-06	0.229885
NM_001323667	chr16	4204635	4213705	introns_1	0.770115	1	87	79	1.02425e-07	1.29134e-06	0.229885
NM_001323668	chr16	4206727	4208104	exons_1	0.672131	1	61	33	7.2577e-06	7.53171e-05	0.327869
NM_003223	chr16	4261779	4261949	exons_4	0.910891	0.0266667	101	75	1.4899e-37	1.8327e-35	-0.884224
NM_003223	chr16	4262324	4262422	exons_5	0.923077	0.142857	39	21	3.60486e-10	5.64215e-09	-0.78022
NM_001370587	chr16	4694239	4695077	introns_1	0.815789	0.416667	76	36	2.71411e-05	0.000262863	-0.399123
NM_001370588	chr16	4694958	4695844	exons_1	0.815789	0.416667	76	36	2.71411e-05	0.000262863	-0.399123
NM_032349	chr16	4694958	4695859	exons_1	0.815789	0.416667	76	36	2.71411e-05	0.000262863	-0.399123
NM_002705	chr16	4892035	4892213	exons_8	0.944444	0.255814	36	43	3.96722e-11	6.9078e-10	-0.68863
NM_002705	chr16	4893541	4893638	exons_10	1	0.648649	37	37	5.06201e-06	5.32558e-05	-0.351351
NM_014692	chr16	4988149	4988280	exons_4	0.837209	0	43	13	3.67325e-09	5.2966e-08	-0.837209
NM_001308117	chr16	6654603	6654650	exons_2	0.944444	0.709677	36	31	0.00798797	0.0477843	-0.234767
NM_001142334	chr16	6774014	7052056	introns_1	0.994444	0.758065	180	124	1.08992e-12	2.22689e-11	-0.23638
NM_001308117	chr16	7052099	7518146	introns_1	0.967905	0.659619	592	473	7.13075e-44	1.19166e-41	-0.308286
NM_145892	chr16	7331844	7333844	promoters	0.983051	0.534884	59	43	5.01257e-09	7.10809e-08	-0.448167
NM_145892	chr16	7333089	7518146	introns_1	0.995455	0.779141	220	163	2.20194e-14	5.23895e-13	-0.216313
NM_001308117	chr16	7518147	7518389	exons_1	0.666667	0	27	17	5.26964e-07	6.16055e-06	-0.666667
NM_001308117	chr16	7595642	7597370	introns_4	1	0.325	32	40	2.16157e-11	3.90311e-10	-0.675
NM_001290098	chr16	8537827	8589212	introns_1	0.909091	0.397727	88	88	1.06273e-13	2.39148e-12	-0.511364
NR_110736	chr16	8552208	8589212	introns_1	0.909091	0.397727	88	88	1.06273e-13	2.39148e-12	-0.511364
NM_001290095	chr16	8570006	8589212	introns_1	0.947368	0.673077	57	52	0.000127685	0.00113592	-0.274291
NM_001290097	chr16	8572225	8589212	introns_2	0.947368	0.673077	57	52	0.000127685	0.00113592	-0.274291
NM_020686	chr16	8674712	8735698	introns_1	0.961905	0	105	126	2.04051e-63	6.95862e-61	-0.961905
NM_000663	chr16	8711968	8713968	promoters	0.961905	0	105	126	2.04051e-63	6.95862e-61	-0.961905
NM_001134408	chr16	9768851	9769089	exons_2	0.960526	0.147727	76	88	1.12822e-29	9.1171e-28	-0.812799
NM_144674	chr16	10690026	10694309	introns_6	0.0277778	0.934783	72	46	3.85215e-27	2.69304e-25	0.907005
NM_144674	chr16	10693930	10695930	promoters	0.0480769	0.958333	104	96	3.22451e-46	5.90634e-44	0.910256
NM_144674	chr16	10694310	10694930	exons_7	0.09375	0.98	32	50	1.03848e-18	3.62094e-17	0.88625
NM_001286403	chr16	10904813	10908982	introns_1	1	0.464286	29	28	2.00444e-07	2.44484e-06	-0.535714
NR_104444	chr16	10904813	10910187	introns_1	1	0.464286	29	28	2.00444e-07	2.44484e-06	-0.535714
NM_000246	chr16	10906499	10908149	exons_1	1	0.464286	29	28	2.00444e-07	2.44484e-06	-0.535714
NM_015226	chr16	11024922	11039753	introns_3	0.472973	0.953846	74	65	3.94264e-11	6.86786e-10	0.480873
NM_005236	chr16	13935146	13935743	exons_8	0.0987654	0.772727	81	22	5.88576e-10	9.06329e-09	0.673962
NM_022166	chr16	17158910	17198211	introns_3	1	0.324324	30	37	9.63383e-11	1.60294e-09	-0.675676
NM_015092	chr16	18896957	18925949	introns_62	0.490566	0.0384615	53	26	9.8708e-06	0.000100863	-0.452104
NR_130967	chr16	19856487	19858467	exons_3	1	0.347826	37	23	8.00033e-10	1.21764e-08	-0.652174
NR_126520	chr16	20900536	20920121	introns_1	0.541401	0.320388	157	103	0.000417521	0.0034066	-0.221013
NR_126521	chr16	20900890	20920121	introns_1	0.541401	0.320388	157	103	0.000417521	0.0034066	-0.221013
NR_126527	chr16	20901125	20920121	introns_1	0.674603	0.37931	126	87	1.86283e-05	0.000184115	-0.295293
NR_161426	chr16	20902712	20920121	introns_1	0.964706	0.647059	85	51	6.17322e-07	7.161e-06	-0.317647
NR_126528	chr16	20902718	20920121	introns_1	0.964706	0.647059	85	51	6.17322e-07	7.161e-06	-0.317647
NR_161427	chr16	20911265	20923999	introns_1	0.964706	0.647059	85	51	6.17322e-07	7.161e-06	-0.317647
NM_020424	chr16	20915556	20915714	exons_1	0.964706	0.647059	85	51	6.17322e-07	7.161e-06	-0.317647
NM_001347886	chr16	20987305	20987448	exons_1	0.972973	0.5	37	14	7.38618e-05	0.000679134	-0.472973
NM_001288659	chr16	21597301	21612644	introns_1	0.407407	0.0853659	108	82	1.82648e-07	2.23494e-06	-0.322042
NM_001077180	chr16	21599899	21612644	introns_1	0.407407	0.0853659	108	82	1.82648e-07	2.23494e-06	-0.322042
NM_001164579	chr16	22075700	22080695	introns_2	0.914286	0.642857	35	28	0.00741315	0.0449223	-0.271429
NM_013302	chr16	22283887	22288738	exons_18	0.97561	0.0425532	41	47	1.22816e-22	6.11835e-21	-0.933057
NM_001802	chr16	22365015	22374230	introns_4	1	0.7	39	20	0.000150752	0.00132651	-0.3
NM_005030	chr16	23680084	23680252	exons_2	0.413793	0.0263158	29	38	3.11704e-05	0.00029981	-0.387477
NM_033266	chr16	23694728	23694927	exons_6	0.891892	0.0689655	37	29	7.73054e-13	1.60527e-11	-0.822926
NM_033266	chr16	23695019	23695118	exons_7	0.971429	0	35	32	5.51632e-20	2.16452e-18	-0.971429
NM_002738	chr16	23837407	23988507	introns_2	0.46988	0.888889	83	54	1.68057e-07	2.06604e-06	0.419009
NM_001770	chr16	28936601	28937022	introns_3	0.96875	0.0151515	96	66	9.1091e-42	1.40993e-39	-0.953598
NM_001014987	chr16	28984051	28986051	promoters	0.763158	0.969697	38	33	0.00746936	0.0452041	0.206539
NM_001014989	chr16	28985889	28986134	introns_3	0.763158	0.969697	38	33	0.00746936	0.0452041	0.206539
NM_001030288	chr16	29663695	29670872	exons_1	0.687023	0.955357	131	112	1.44674e-08	1.94753e-07	0.268334
NM_007317	chr16	29804814	29805026	exons_11	0.382353	0	102	55	2.15576e-10	3.44609e-09	-0.382353
NM_002383	chr16	29808570	29808741	exons_3	0.830508	0	59	57	1.73329e-24	1.0342e-22	-0.830508
NM_002383	chr16	29808742	29810076	introns_1	0.944	0.0144928	125	69	3.36845e-44	5.76705e-42	-0.929507
NM_001042539	chr16	29808742	29809539	introns_1	0.972222	0.0416667	36	24	1.76735e-15	4.61316e-14	-0.930556
NM_001042539	chr16	29809765	29810076	introns_1	0.932584	0	89	45	5.1986e-31	4.67941e-29	-0.932584
NM_001114100	chr16	29877271	29877467	exons_5	0.650794	0	63	88	1.82501e-22	8.99553e-21	-0.650794
NM_001114100	chr16	29878287	29878425	exons_6	1	0.0526316	29	19	8.55086e-14	1.93669e-12	-0.947368
NM_001114100	chr16	29885586	29885749	exons_8	0.943662	0.0666667	71	60	4.89978e-28	3.5806e-26	-0.876995
NM_001243333	chr16	29897122	29898940	introns_1	0.285714	0	49	15	0.00334192	0.022265	-0.285714
NM_001114100	chr16	29897985	29898940	introns_1	0.285714	0	49	15	0.00334192	0.022265	-0.285714
NM_004608	chr16	30090924	30092924	promoters	0.55814	0	43	21	4.0884e-07	4.82668e-06	-0.55814
NM_001145524	chr16	30092314	30092799	exons_1	0.55814	0	43	21	4.0884e-07	4.82668e-06	-0.55814
NM_001145524	chr16	30095213	30097213	promoters	0.818182	0.0229885	77	87	1.01999e-29	8.27552e-28	-0.795193
NM_001145524	chr16	30095252	30095434	exons_4	0.818182	0.0229885	77	87	1.01999e-29	8.27552e-28	-0.795193
NM_031477	chr16	30095252	30096213	exons_1	0.818182	0.0229885	77	87	1.01999e-29	8.27552e-28	-0.795193
NM_024096	chr16	30424534	30429056	introns_1	0.852459	0.0416667	61	24	2.96451e-13	6.36058e-12	-0.810792
NR_134471	chr16	30428800	30430800	promoters	0.346154	0.00934579	156	107	4.05062e-14	9.44453e-13	-0.336808
NM_012248	chr16	30443631	30445874	exons_1	0.851852	0.030303	27	33	2.37494e-12	4.71905e-11	-0.821549
NM_001114380	chr16	30506715	30506856	exons_3	0.966667	0.291667	30	24	2.57994e-08	3.40845e-07	-0.675
NM_001286572	chr16	30761321	30763321	promoters	0.971429	0.315789	35	38	2.9352e-10	4.62682e-09	-0.655639
NM_001286572	chr16	30763118	30763285	exons_2	0.971429	0.315789	35	38	2.9352e-10	4.62682e-09	-0.655639
NM_001286572	chr16	30773938	30776307	exons_1	0.969697	0	33	13	5.3023e-12	1.01681e-10	-0.969697
NM_001080417	chr16	30778456	30784254	exons_1	1	0.666667	45	12	0.000215576	0.0018473	-0.333333
NM_001345970	chr16	30778456	30784273	exons_1	1	0.666667	45	12	0.000215576	0.0018473	-0.333333
NM_001282351	chr16	30927308	30927451	exons_2	0.92	0.215686	75	51	4.87598e-17	1.4778e-15	-0.704314
NM_052874	chr16	30997502	30997575	exons_6	1	0	27	19	2.84462e-15	7.24471e-14	-1
NM_052874	chr16	30997576	31000927	introns_6	0.967742	0	31	19	2.06855e-14	4.92997e-13	-0.967742
NM_024706	chr16	31063813	31064481	exons_1	0.810811	0.0298507	111	67	4.03469e-28	2.9639e-26	-0.78096
NM_001145808	chr16	31331636	31332877	exons_16	0.938776	0	49	20	6.53993e-16	1.76983e-14	-0.938776
NM_003041	chr16	31485729	31485893	exons_4	0.483471	0.97619	242	210	1.1761e-36	1.37801e-34	0.492719
NM_003041	chr16	31488038	31488173	exons_8	0.944444	0	36	19	3.05935e-14	7.21346e-13	-0.944444
NM_001308301	chr16	46740148	46763039	introns_1	0	0.935484	34	31	5.99552e-18	1.97556e-16	0.935484
NM_182493	chr16	46740148	46747716	introns_1	0	0.935484	34	31	5.99552e-18	1.97556e-16	0.935484
NM_182493	chr16	46747344	46749344	promoters	0	0.935484	34	31	5.99552e-18	1.97556e-16	0.935484
NM_003031	chr16	48360536	48362430	exons_1	0.986842	0.626374	76	91	1.91497e-10	3.07644e-09	-0.360468
NM_001348078	chr16	48361477	48363003	exons_1	0.986842	0.626374	76	91	1.91497e-10	3.07644e-09	-0.360468
NM_001271620	chr16	49638875	49730770	introns_1	0.969095	0.757303	453	445	1.43799e-22	7.09624e-21	-0.211792
NM_001379286	chr16	49789547	49855734	introns_1	0.966667	0.510204	30	49	2.81017e-06	3.04666e-05	-0.456463
NM_001293557	chr16	50712374	50716586	introns_3	0.978723	0.266667	47	45	1.3306e-14	3.22063e-13	-0.712057
NR_163434	chr16	50712374	50715608	introns_1	0.978723	0.266667	47	45	1.3306e-14	3.22063e-13	-0.712057
NM_001293557	chr16	50731747	50733073	exons_8	0.688525	0.964286	61	28	0.0011686	0.00876419	0.275761
NR_039672	chr16	50877772	50879772	promoters	0.96875	0.0294118	32	34	1.00031e-17	3.22514e-16	-0.939338
NM_001080430	chr16	52463934	52464188	exons_5	0.980132	0.350365	151	137	2.40989e-35	2.63243e-33	-0.629767
NM_001146188	chr16	52463934	52464185	exons_1	0.980132	0.350365	151	137	2.40989e-35	2.63243e-33	-0.629767
NR_134922	chr16	54369458	54371458	promoters	0.955556	0	45	16	3.1377e-14	7.3816e-13	-0.955556
NR_134923	chr16	54369699	54371699	promoters	0.955556	0	45	16	3.1377e-14	7.3816e-13	-0.955556
NR_134923	chr16	54370566	54370699	exons_1	0.955556	0	45	16	3.1377e-14	7.3816e-13	-0.955556
NM_001143685	chr16	55846768	55846840	exons_2	0.461538	0.166667	39	42	0.00367873	0.0242508	-0.294872
NM_138736	chr16	56276073	56328630	introns_1	1	0.227273	27	22	2.99204e-10	4.71288e-09	-0.772727
NM_001323511	chr16	56386023	56389184	introns_1	1	0.28	51	25	2.50938e-13	5.40897e-12	-0.72
NM_001323512	chr16	56386023	56388757	introns_1	1	0.28	51	25	2.50938e-13	5.40897e-12	-0.72
NM_015993	chr16	57262071	57284405	introns_3	1	0.769231	42	13	0.00236743	0.0164537	-0.230769
NM_033212	chr16	57535571	57537571	promoters	0.677419	0	31	40	6.27179e-12	1.19201e-10	-0.677419
NM_001370428	chr16	57619882	57641590	introns_1	0.538462	1	52	12	0.000328444	0.00273515	0.461538
NM_001370440	chr16	57619882	57641586	introns_1	0.538462	1	52	12	0.000328444	0.00273515	0.461538
NM_001370431	chr16	57620137	57641586	introns_1	0.538462	1	52	12	0.000328444	0.00273515	0.461538
NM_001370442	chr16	57620137	57641590	introns_1	0.538462	1	52	12	0.000328444	0.00273515	0.461538
NM_201525	chr16	57628803	57650252	introns_1	0.913043	0.333333	46	18	2.89641e-06	3.13288e-05	-0.57971
NM_001290144	chr16	57639671	57650252	introns_1	0.913043	0.333333	46	18	2.89641e-06	3.13288e-05	-0.57971
NM_001370431	chr16	57641709	57650252	introns_1	0.913043	0.333333	46	18	2.89641e-06	3.13288e-05	-0.57971
NM_001370454	chr16	57641709	57651246	introns_1	0.913043	0.333333	46	18	2.89641e-06	3.13288e-05	-0.57971
NM_005886	chr16	57752778	57752928	exons_10	0.971429	0.744898	140	98	8.14276e-08	1.03502e-06	-0.226531
NM_001286130	chr16	57882340	57884457	exons_1	0.9	0	30	37	3.87739e-17	1.18284e-15	-0.9
NM_001896	chr16	58157908	58158353	exons_1	0.724138	1	29	21	0.00174053	0.0126116	0.275862
[truncated: 3,228 more rows]

## Sheet: Table S4
Supplementary Table 4. The details of the DMPs, DMEs and DMIs for human and mouse comparison using RRBS dataset.
ID	Chromosome	Start	End	Feature	Methylation (Mouse)	Methylation (Human)	Read (Mouse)	Read (Human)	Pvalue	Qvalue	Methylation Difference (Human - Mouse)
NM_001330311	chr1	1338522	1338653	exons_4	0.952941	0.45	85	80	5.29735e-14	1.39852e-12	-0.502941
NM_001114748	chr1	1534778	1535507	exons_1	0.0465116	0.911765	86	68	9.8933e-32	6.43998e-30	0.865253
NM_002744	chr1	2059592	2135261	introns_4	0.229333	0.929936	375	314	8.34463e-86	2.02501e-83	0.700603
NM_001350804	chr1	2072461	2074461	promoters	0.229333	0.929936	375	314	8.34463e-86	2.02501e-83	0.700603
NM_001350805	chr1	2072985	2074985	promoters	0.229333	0.929936	375	314	8.34463e-86	2.02501e-83	0.700603
NM_001350804	chr1	2073462	2073929	exons_1	0.229333	0.929936	375	314	8.34463e-86	2.02501e-83	0.700603
NM_001303012	chr1	2466450	2468450	promoters	0.944444	0	90	32	5.62076e-26	3.00176e-24	-0.944444
NM_001303012	chr1	2467451	2467662	exons_1	0.944444	0	90	32	5.62076e-26	3.00176e-24	-0.944444
NM_001010926	chr1	2530012	2530110	introns_2	0	0.456522	156	92	2.83759e-23	1.3222e-21	0.456522
NM_022114	chr1	3244138	3385151	introns_2	0.953061	0.419689	490	386	4.84573e-74	9.42245e-72	-0.533372
NM_022114	chr1	3425581	3425750	exons_12	0.0977778	1	225	84	4.91394e-57	6.18504e-55	0.902222
NM_001409	chr1	3524247	3579824	introns_33	0.950549	0	182	58	3.77828e-48	3.96575e-46	-0.950549
NM_015215	chr1	6825211	7091303	introns_1	0.29	0.075	300	160	1.13757e-08	1.75698e-07	-0.215
NM_015215	chr1	7663353	7665199	exons_4	0.0982906	0.943878	468	392	7.78197e-159	9.44233e-156	0.845587
NM_001079843	chr1	10693913	10705491	introns_13	0.00358423	0.538462	279	208	2.35974e-51	2.66097e-49	0.534877
NM_001079843	chr1	10705545	10760700	introns_14	0.327738	0.943925	1251	642	5.46377e-166	7.53354e-163	0.616187
NM_002521	chr1	11857945	11859945	promoters	0.987179	0.352941	78	68	1.88047e-19	7.18414e-18	-0.634238
NM_002521	chr1	11858214	11858469	exons_2	0.987179	0.352941	78	68	1.88047e-19	7.18414e-18	-0.634238
NM_001324137	chr1	15943599	15943715	exons_4	0.979866	0	149	72	3.89322e-57	4.9207e-55	-0.979866
NM_001324137	chr1	15943896	15944299	introns_5	0.909091	0.0526316	44	38	3.31278e-17	1.12154e-15	-0.856459
NM_001135254	chr1	18635111	18635240	exons_3	0.955882	0.698113	272	212	2.34935e-15	6.82615e-14	-0.257769
NM_001135254	chr1	18703297	18735631	introns_4	0.0630631	0.92	111	50	8.84051e-29	5.24791e-27	0.856937
NM_001376794	chr1	20779912	20786648	introns_1	0	0.222222	71	36	1.49671e-05	0.000127891	0.222222
NM_001376797	chr1	20779912	20787194	introns_1	0	0.222222	71	36	1.49671e-05	0.000127891	0.222222
NM_001372052	chr1	20780541	20787194	introns_1	0	0.222222	71	36	1.49671e-05	0.000127891	0.222222
NM_001376787	chr1	20780541	20786513	introns_1	0	0.222222	71	36	1.49671e-05	0.000127891	0.222222
NM_001376790	chr1	20780541	20786568	introns_1	0	0.222222	71	36	1.49671e-05	0.000127891	0.222222
NM_016287	chr1	20780541	20786648	introns_1	0	0.222222	71	36	1.49671e-05	0.000127891	0.222222
NM_001376788	chr1	20785652	20787652	promoters	0	0.222222	71	36	1.49671e-05	0.000127891	0.222222
NM_001376794	chr1	20785666	20787666	promoters	0	0.222222	71	36	1.49671e-05	0.000127891	0.222222
NM_016287	chr1	20785672	20787672	promoters	0	0.222222	71	36	1.49671e-05	0.000127891	0.222222
NM_001376788	chr1	20786186	20786652	exons_1	0	0.222222	71	36	1.49671e-05	0.000127891	0.222222
NM_001376796	chr1	20786253	20786652	exons_1	0	0.222222	71	36	1.49671e-05	0.000127891	0.222222
NM_001372052	chr1	20786307	20788307	promoters	0	0.222222	71	36	1.49671e-05	0.000127891	0.222222
NM_001350525	chr1	21602914	21603834	introns_1	0.201835	0.964286	109	56	1.00898e-23	4.81231e-22	0.762451
NM_002885	chr1	21602914	21606065	introns_1	0.201835	0.964286	109	56	1.00898e-23	4.81231e-22	0.762451
NM_001330383	chr1	21603658	21603912	exons_1	0.201835	0.964286	109	56	1.00898e-23	4.81231e-22	0.762451
NM_000864	chr1	23191895	23195001	exons_1	0.533333	0.961538	270	156	2.71706e-24	1.34069e-22	0.428205
NM_002167	chr1	23558501	23560501	promoters	0.00980392	0.884615	102	52	1.56988e-32	1.03975e-30	0.874811
NM_002167	chr1	23558935	23559019	exons_2	0.00980392	0.884615	102	52	1.56988e-32	1.03975e-30	0.874811
NM_001366600	chr1	24643348	24645983	introns_1	0.0149254	0.263158	67	38	5.57215e-05	0.000411655	0.248233
NM_004455	chr1	26035005	26035164	introns_10	0.266667	0.0645161	60	62	0.00194085	0.00918039	-0.202151
NM_001297609	chr1	27361157	27361252	exons_17	0.733333	0	90	96	9.09263e-32	5.93152e-30	-0.733333
NM_001161708	chr1	32694865	32696044	exons_2	0.0146341	0.985075	205	134	8.53437e-90	2.23174e-87	0.97044
NM_001281956	chr1	33600865	33601010	exons_9	0.348101	0.925926	158	162	1.02259e-29	6.26654e-28	0.577825
NM_001281956	chr1	33633422	33633535	exons_10	0.971154	0	104	44	3.38937e-36	2.5386e-34	-0.971154
NM_001080418	chr1	34899669	34899741	exons_8	0.0546875	1	256	52	6.56453e-48	6.81947e-46	0.945312
NM_014466	chr1	36085163	36085288	exons_3	0.29878	1	164	76	1.30564e-30	8.23392e-29	0.70122
NM_005202	chr1	36100259	36115707	introns_1	0	0.857143	80	28	1.14446e-21	5.00233e-20	0.857143
NM_001162530	chr1	36321056	36321347	exons_13	0.941176	0	34	42	5.7892e-21	2.43227e-19	-0.941176
NM_001304762	chr1	36322030	36322725	exons_1	0.803922	0	51	34	2.39473e-16	7.51206e-15	-0.803922
NR_038928	chr1	38212452	38214716	introns_3	0.983122	0	237	92	1.48695e-79	3.1107e-77	-0.983122
NM_001355226	chr1	42566296	42566475	exons_1	0	1	58	56	3.09102e-36	2.33241e-34	1
NM_004559	chr1	42683467	42693489	introns_1	0	0.285714	129	28	5.01489e-08	6.93647e-07	0.285714
NM_001319956	chr1	44412723	44614164	introns_1	0.212895	0.438903	822	802	1.18244e-22	5.31381e-21	0.226007
NM_001319957	chr1	44424140	44614164	introns_1	0.343874	0.955056	506	356	7.61922e-85	1.79164e-82	0.611183
NM_006369	chr1	46302616	46304616	promoters	0	0.351064	231	188	3.3044e-28	1.92391e-26	0.351064
NM_001297566	chr1	46302697	46304697	promoters	0	0.351064	231	188	3.3044e-28	1.92391e-26	0.351064
NM_001290405	chr1	47216290	47220174	exons_1	0.306569	0	411	180	7.96556e-25	4.04059e-23	-0.306569
NM_001290406	chr1	47216291	47220174	exons_1	0.306569	0	411	180	7.96556e-25	4.04059e-23	-0.306569
NM_002370	chr1	53237518	53239518	promoters	0	0.25	72	56	4.6801e-07	5.43099e-06	0.25
NR_038953	chr1	53237609	53239609	promoters	0	0.25	72	56	4.6801e-07	5.43099e-06	0.25
NM_001305050	chr1	54043526	54052999	introns_1	0	0.226415	124	106	1.98195e-10	3.93202e-09	0.226415
NM_001305052	chr1	54045787	54053355	introns_1	0	0.226415	124	106	1.98195e-10	3.93202e-09	0.226415
NM_001305051	chr1	54047373	54053355	introns_1	0	0.226415	124	106	1.98195e-10	3.93202e-09	0.226415
NM_001305066	chr1	54047373	54052999	introns_1	0	0.226415	124	106	1.98195e-10	3.93202e-09	0.226415
NM_001305043	chr1	54052204	54054204	promoters	0	0.226415	124	106	1.98195e-10	3.93202e-09	0.226415
NM_001305066	chr1	54052438	54054438	promoters	0	0.226415	124	106	1.98195e-10	3.93202e-09	0.226415
NM_001305052	chr1	54052573	54054573	promoters	0	0.226415	124	106	1.98195e-10	3.93202e-09	0.226415
NR_130900	chr1	54052607	54054607	promoters	0	0.226415	124	106	1.98195e-10	3.93202e-09	0.226415
NM_001291333	chr1	54714821	54716821	promoters	0	0.25	72	24	2.33322e-05	0.000188484	0.25
NM_004623	chr1	54714860	54716860	promoters	0	0.25	72	24	2.33322e-05	0.000188484	0.25
NR_037639	chr1	54715611	54716599	introns_1	0	0.25	72	24	2.33322e-05	0.000188484	0.25
NM_001291333	chr1	54716020	54716599	introns_1	0	0.25	72	24	2.33322e-05	0.000188484	0.25
NM_001004303	chr1	56818404	56820404	promoters	0	1	110	26	1.04346e-30	6.59426e-29	1
NM_001199742	chr1	67687661	67688334	exons_1	0.59	0.9	100	80	1.32996e-06	1.43314e-05	0.31
NR_168347	chr1	70354811	70355208	exons_1	0	0.34375	83	64	1.0447e-10	2.13688e-09	0.34375
NR_168348	chr1	70354811	70355107	exons_1	0	0.34375	83	64	1.0447e-10	2.13688e-09	0.34375
NR_168351	chr1	70354811	70355111	exons_1	0	0.34375	83	64	1.0447e-10	2.13688e-09	0.34375
NM_198077	chr1	85258662	85260662	promoters	0.0015748	0.226766	635	538	1.2374e-44	1.18036e-42	0.225191
NM_198077	chr1	85259358	85259662	exons_1	0.00209205	0.238579	478	394	3.51109e-35	2.52982e-33	0.236487
NM_020063	chr1	90711539	90712624	exons_1	0	0.785714	53	28	5.38822e-16	1.66442e-14	0.785714
NM_006492	chr1	110064587	110064903	exons_3	0.27381	0.928571	84	28	1.98369e-10	3.93288e-09	0.654762
NM_004978	chr1	110209313	110211313	promoters	0	0.285714	131	56	8.00472e-11	1.66198e-09	0.285714
NR_036595	chr1	110318883	110338996	introns_3	0.00632911	0.28169	158	142	2.19317e-14	5.92409e-13	0.275361
NM_005549	chr1	110517217	110519175	exons_1	0.960526	0.496644	304	298	1.45514e-42	1.33758e-40	-0.463882
NM_005549	chr1	110518175	110520175	promoters	0.96	0.354839	250	186	1.38964e-46	1.39581e-44	-0.605161
NM_001142782	chr1	113390515	113391349	exons_1	0.00372578	0.204545	1342	352	2.96404e-46	2.90975e-44	0.20082
NM_020440	chr1	116944679	116945092	exons_3	0.96831	0	284	176	1.76719e-119	9.40457e-117	-0.96831
NM_006099	chr1	145856589	145857006	exons_10	0.0805861	0.965517	273	174	6.04922e-90	1.59563e-87	0.884931
NM_014644	chr1	149017748	149017879	exons_3	0.0972222	1	144	150	8.96023e-70	1.52696e-67	0.902778
NM_001304724	chr1	150158819	150160065	exons_1	0.675	1	40	90	5.30257e-09	8.61072e-08	0.325
NM_001288607	chr1	150560060	150560933	exons_4	0.115385	0.972222	156	72	8.71732e-40	7.42784e-38	0.856838
NM_001288608	chr1	150560060	150560936	exons_1	0.115385	0.972222	156	72	8.71732e-40	7.42784e-38	0.856838
NM_001040217	chr1	151005902	151007902	promoters	0.00736648	0.962162	543	370	4.07098e-232	7.71807e-229	0.954796
NM_001163258	chr1	151006248	151008247	introns_1	0.00736648	0.962162	543	370	4.07098e-232	7.71807e-229	0.954796
NM_001319998	chr1	151006312	151007619	exons_1	0.00736648	0.962162	543	370	4.07098e-232	7.71807e-229	0.954796
NM_001376664	chr1	151006312	151006902	exons_1	0.00736648	0.962162	543	370	4.07098e-232	7.71807e-229	0.954796
NM_018379	chr1	151006312	151006797	exons_1	0.00736648	0.962162	543	370	4.07098e-232	7.71807e-229	0.954796
NM_001159642	chr1	151046651	151047720	exons_8	0.321429	0.0793651	224	126	4.53511e-08	6.30757e-07	-0.242063
NM_017860	chr1	151046750	151048750	promoters	0.411765	0	102	84	7.36373e-15	2.07981e-13	-0.411765
NM_001172649	chr1	151708998	151709077	exons_3	0.0201342	0.894737	149	76	2.04211e-45	1.97909e-43	0.874603
NM_001172648	chr1	151715619	151716803	exons_1	0.558376	0.854369	197	206	3.03298e-11	6.52037e-10	0.295993
NM_001172649	chr1	151715803	151717803	promoters	0.558376	0.854369	197	206	3.03298e-11	6.52037e-10	0.295993
NM_001172649	chr1	151715876	151716803	exons_1	0.558376	0.854369	197	206	3.03298e-11	6.52037e-10	0.295993
NM_002016	chr1	152302165	152314747	exons_1	0.0840336	0.4375	119	64	3.20953e-08	4.58155e-07	0.353466
NR_030600	chr1	154192743	154194743	promoters	0.775	1	120	116	2.67525e-10	5.26271e-09	0.225
NM_000748	chr1	154571189	154572161	exons_5	0.344569	0.015625	267	128	9.9002e-17	3.23613e-15	-0.328944
NM_002249	chr1	154697458	154708272	exons_1	0.011236	0.22619	356	168	9.646e-17	3.17012e-15	0.214955
NM_001365837	chr1	154697466	154708272	exons_1	0.011236	0.22619	356	168	9.646e-17	3.17012e-15	0.214955
NM_001130040	chr1	154969747	154971747	promoters	0.0403226	0.652174	124	92	2.67494e-24	1.32368e-22	0.611851
NM_001130040	chr1	154970032	154970747	exons_9	0.0403226	0.652174	124	92	2.67494e-24	1.32368e-22	0.611851
NM_001202859	chr1	154970200	154974247	introns_1	0.0403226	0.652174	124	92	2.67494e-24	1.32368e-22	0.611851
NM_001093725	chr1	156072013	156077682	exons_1	0.648649	0	74	60	6.5576e-19	2.45578e-17	-0.648649
NM_001323617	chr1	156279035	156286632	introns_1	0.00707547	0.229008	424	262	2.9576e-24	1.44703e-22	0.221932
NM_001323615	chr1	156279035	156282606	introns_9	0	0.212121	103	66	1.01829e-07	1.33544e-06	0.212121
NM_001323616	chr1	156281925	156282606	introns_1	0	0.212121	103	66	1.01829e-07	1.33544e-06	0.212121
NR_026678	chr1	156286260	156286473	exons_2	0.025641	1	78	44	5.66837e-33	3.81251e-31	0.974359
NM_002241	chr1	160037467	160042532	exons_1	0.0122449	0.944444	245	72	1.56759e-61	2.17129e-59	0.9322
NM_001206665	chr1	160092924	160093331	exons_3	0.309524	1	336	168	8.57648e-63	1.20444e-60	0.690476
NM_001287602	chr1	161046946	161049334	exons_1	0.964286	0.45098	308	102	4.51842e-30	2.78581e-28	-0.513305
NM_181720	chr1	161046946	161048355	exons_1	0.964286	0.45098	308	102	4.51842e-30	2.78581e-28	-0.513305
NM_001377298	chr1	161196416	161198416	promoters	0.522727	1	44	28	3.38292e-07	4.02738e-06	0.477273
NM_001377298	chr1	161197488	161202146	introns_1	0.491525	0.915493	118	142	5.692e-15	1.61517e-13	0.423968
NM_001320336	chr1	161197995	161199054	exons_1	0.491525	0.915493	118	142	5.692e-15	1.61517e-13	0.423968
NM_005099	chr1	161198054	161200054	promoters	0.491525	0.915493	118	142	5.692e-15	1.61517e-13	0.423968
NM_001377301	chr1	161198304	161200304	promoters	0.472973	0.894737	74	114	1.78334e-10	3.55894e-09	0.421764
NM_004550	chr1	161198314	161200314	promoters	0.472973	0.894737	74	114	1.78334e-10	3.55894e-09	0.421764
NM_001288829	chr1	161727247	161728143	exons_2	0	0.217391	156	138	2.23947e-12	5.19756e-11	0.217391
NM_002585	chr1	164799699	164799889	exons_2	0.97	0.318182	300	132	1.42989e-49	1.54908e-47	-0.651818
NM_013330	chr1	169366797	169368797	promoters	0	0.21	344	200	2.11451e-21	9.11101e-20	0.21
NM_003666	chr1	169366878	169368878	promoters	0	0.21	344	200	2.11451e-21	9.11101e-20	0.21
NM_197972	chr1	169366963	169368963	promoters	0	0.21	344	200	2.11451e-21	9.11101e-20	0.21
NM_001320973	chr1	169367194	169369194	promoters	0	0.21	344	200	2.11451e-21	9.11101e-20	0.21
NM_003666	chr1	169367879	169368342	exons_1	0	0.21	344	200	2.11451e-21	9.11101e-20	0.21
NM_000721	chr1	181484011	181510476	introns_1	0.333333	0	66	34	3.80288e-06	3.7284e-05	-0.333333
NM_000721	chr1	181776229	181781426	introns_20	0.701754	1	57	84	4.66839e-09	7.62989e-08	0.298246
NM_032833	chr1	204409492	204411817	exons_2	0.382979	0	94	92	3.1171e-14	8.33077e-13	-0.382979
NM_001242925	chr1	205227930	205229930	promoters	0.5	0.142857	54	42	0.000160853	0.0010446	-0.357143
NM_001375652	chr1	205228714	205230714	promoters	0.5	0.142857	54	42	0.000160853	0.0010446	-0.357143
NM_014858	chr1	205228772	205241504	introns_1	0.5	0.142857	54	42	0.000160853	0.0010446	-0.357143
NM_001242925	chr1	205229129	205241504	introns_1	0.5	0.142857	54	42	0.000160853	0.0010446	-0.357143
NM_001375652	chr1	205229715	205230169	exons_1	0.5	0.142857	54	42	0.000160853	0.0010446	-0.357143
NM_001297613	chr1	205268950	205269884	exons_1	0.16087	1	230	88	1.74365e-50	1.91637e-48	0.83913
NR_106919	chr1	206473802	206475802	promoters	0.0128205	1	78	70	3.79808e-44	3.53408e-42	0.987179
NM_014002	chr1	206474331	206474471	exons_2	0.0128205	1	78	70	3.79808e-44	3.53408e-42	0.987179
NM_153758	chr1	206771079	206798860	introns_1	0.029703	1	101	78	1.15063e-49	1.25551e-47	0.970297
NM_002763	chr1	213996469	213998260	exons_2	0.449749	0.0813953	398	344	1.43387e-31	9.29383e-30	-0.368353
NM_001310327	chr1	228173569	228175569	promoters	0.970909	0	275	138	5.85562e-103	2.16615e-100	-0.970909
NM_001010867	chr1	228174692	228175029	exons_1	0.970909	0	275	138	5.85562e-103	2.16615e-100	-0.970909
NM_002508	chr1	236048690	236048989	exons_19	0.553903	0.990196	269	204	5.27208e-34	3.66796e-32	0.436293
NM_080738	chr1	236482267	236484905	exons_1	0.4375	0.9375	48	32	9.52383e-07	1.04862e-05	0.5
NM_145861	chr1	236482267	236484930	exons_1	0.4375	0.9375	48	32	9.52383e-07	1.04862e-05	0.5
NM_181690	chr1	243488451	243499736	introns_1	0.972727	0	110	84	5.45885e-54	6.39339e-52	-0.972727
NM_001350249	chr1	243489014	243489140	exons_1	0.972727	0	110	84	5.45885e-54	6.39339e-52	-0.972727
NM_032752	chr1	247297415	247301276	exons_1	0.974227	0	194	374	4.56421e-149	4.94467e-146	-0.974227
NM_018702	chr10	1379161	1737050	introns_9	0.968504	0.68	127	50	2.44638e-07	2.98026e-06	-0.288504
NM_024701	chr10	5665595	5667595	promoters	0	0.580645	48	124	6.75467e-16	2.06133e-14	0.580645
NM_001010924	chr10	15370289	15372289	promoters	0	0.230769	85	26	1.61873e-05	0.0001367	0.230769
NM_001010924	chr10	15370956	15371289	exons_8	0	0.230769	85	26	1.61873e-05	0.0001367	0.230769
NM_001351116	chr10	18659193	18659238	exons_2	0	0.444444	86	54	1.91658e-13	4.75757e-12	0.444444
NM_001365862	chr10	23201916	23204255	exons_1	0.852941	0.296296	34	108	4.55517e-09	7.46094e-08	-0.556645
NM_001024628	chr10	33330708	33330882	exons_2	0.106667	0.72	75	50	5.69231e-13	1.3704e-11	0.613333
NM_006963	chr10	45003280	45005326	exons_2	0.955556	0.54	45	100	4.86216e-08	6.7408e-07	-0.415556
NM_032199	chr10	61902414	61940182	introns_2	0	0.235294	50	68	1.02545e-05	9.18394e-05	0.235294
NM_033500	chr10	69400991	69401881	exons_14	0.607143	1	84	42	1.28855e-08	1.97708e-07	0.392857
NM_022146	chr10	70266077	70266391	exons_3	0.313559	0.842105	236	76	1.25706e-16	4.06522e-15	0.528546
NM_001161352	chr10	76884883	76887515	exons_1	0.434959	0.769231	246	52	7.63642e-06	6.97931e-05	0.334271
NR_120655	chr10	76887043	76889043	promoters	0.434959	0.769231	246	52	7.63642e-06	6.97931e-05	0.334271
NM_001322832	chr10	76887291	76887515	exons_1	0.434959	0.769231	246	52	7.63642e-06	6.97931e-05	0.334271
NM_020338	chr10	79069271	79118914	introns_1	0.603352	0.833333	358	432	3.75569e-13	9.14325e-12	0.229981
NR_038986	chr10	85579604	85605394	introns_2	0.720183	1	218	106	1.21138e-13	3.0957e-12	0.279817
NM_017551	chr10	85599553	85602701	exons_1	0.720183	1	218	106	1.21138e-13	3.0957e-12	0.279817
NM_183374	chr10	93059797	93061797	promoters	0.553299	0	197	92	3.29746e-26	1.78616e-24	-0.553299
NM_183374	chr10	93060798	93061467	exons_1	0.553299	0	197	92	3.29746e-26	1.78616e-24	-0.553299
NM_003061	chr10	96998038	97001350	exons_1	0.0646388	1	263	108	1.08792e-77	2.15693e-75	0.935361
NM_018058	chr10	97895414	97895884	introns_4	0.0280374	1	107	30	8.80826e-29	5.23901e-27	0.971963
NM_032211	chr10	98257981	98258164	exons_9	0.013245	1	151	92	7.16011e-68	1.11382e-65	0.986755
NR_120621	chr10	101260966	101263174	introns_2	0.0392157	0.529412	102	102	1.10695e-16	3.60103e-15	0.490196
NM_005736	chr10	102502600	102502712	exons_11	0	0.258065	45	62	1.01697e-05	9.11065e-05	0.258065
NM_004311	chr10	102673731	102676941	exons_1	0.596939	0.882353	196	136	3.86266e-09	6.38528e-08	0.285414
NM_000494	chr10	104035474	104035563	exons_8	0.941176	0.636364	68	44	3.74329e-05	0.000288782	-0.304813
NM_033397	chr10	104309696	104316064	exons_1	0.882353	0.470588	119	68	1.2315e-09	2.21567e-08	-0.411765
NM_001272013	chr10	104309700	104316064	exons_1	0.882353	0.470588	119	68	1.2315e-09	2.21567e-08	-0.411765
NM_001134363	chr10	110812278	110812947	exons_9	0.0175439	1	57	30	2.94974e-24	1.44552e-22	0.982456
NM_203379	chr10	112374270	112394917	introns_1	0.00403226	0.982456	248	114	1.55145e-92	4.23979e-90	0.978424
NM_016234	chr10	112375197	112377197	promoters	0.00403226	0.982456	248	114	1.55145e-92	4.23979e-90	0.978424
NM_203380	chr10	112375543	112394917	introns_1	0.00403226	0.982456	248	114	1.55145e-92	4.23979e-90	0.978424
NM_016234	chr10	112376198	112376448	exons_1	0.00403226	0.982456	248	114	1.55145e-92	4.23979e-90	0.978424
NM_022494	chr10	112446705	112446914	exons_1	0.0196078	0.227273	51	44	0.000864532	0.00460501	0.207665
NM_001352440	chr10	114547650	114547776	exons_2	0.971774	0	248	76	2.71408e-68	4.31042e-66	-0.971774
NM_004248	chr10	118589997	118595250	exons_1	0.00520833	0.210526	192	76	2.05025e-09	3.54776e-08	0.205318
NM_004248	chr10	118594648	118596648	promoters	0.00520833	0.210526	192	76	2.05025e-09	3.54776e-08	0.205318
NR_134516	chr10	120455953	120457953	promoters	0.625	0.117647	88	34	1.257e-07	1.62048e-06	-0.507353
NM_001005463	chr10	129848481	129867140	introns_1	0.971014	0.0384615	138	104	1.28839e-58	1.67017e-56	-0.932553
NM_001098483	chr10	133356943	133357013	exons_3	0.106061	0.666667	66	36	3.62491e-09	6.05163e-08	0.560606
NM_178537	chr11	376421	377327	exons_14	0.539033	0	269	148	2.58489e-38	2.15412e-36	-0.539033
NM_020376	chr11	823998	824130	exons_8	0.461538	0	52	44	1.79075e-09	3.14174e-08	-0.461538
NM_020376	chr11	824523	825571	exons_10	0.326087	0	46	46	1.10539e-06	1.20788e-05	-0.326087
NM_001007139	chr11	2148603	2150603	promoters	0.445946	0.866667	74	30	3.72899e-05	0.000287825	0.420721
NM_001007139	chr11	2149126	2149603	exons_1	0.445946	0.866667	74	30	3.72899e-05	0.000287825	0.420721
NR_003512	chr11	2149126	2149345	exons_1	0.445946	0.866667	74	30	3.72899e-05	0.000287825	0.420721
NM_199293	chr11	2166887	2167032	exons_7	0.390625	0.0384615	64	52	1.39281e-06	1.49134e-05	-0.352163
NM_001376505	chr11	8717893	8810516	introns_1	0.917431	0.0714286	109	168	6.60334e-51	7.28385e-49	-0.846003
NM_001376504	chr11	8726210	8750620	introns_1	0.917431	0.0714286	109	168	6.60334e-51	7.28385e-49	-0.846003
NM_001376506	chr11	8726210	8810516	introns_1	0.917431	0.0714286	109	168	6.60334e-51	7.28385e-49	-0.846003
NM_005418	chr11	8729950	8731209	exons_1	0.917431	0.0714286	109	168	6.60334e-51	7.28385e-49	-0.846003
NM_001376500	chr11	8730621	8731122	introns_1	0.917431	0.0714286	109	168	6.60334e-51	7.28385e-49	-0.846003
NM_020646	chr11	8937572	8938173	exons_1	0.0298507	1	67	70	3.34493e-39	2.82633e-37	0.970149
NM_003390	chr11	9575888	9576093	exons_1	0.830247	0.124324	324	370	2.52459e-85	5.98288e-83	-0.705923
NR_103765	chr11	10308674	10330569	introns_1	0.225352	1	71	104	9.25026e-33	6.16697e-31	0.774648
NM_000525	chr11	17385249	17388659	exons_1	0.1875	0.913043	192	92	7.12256e-34	4.89922e-32	0.725543
NM_000525	chr11	17387659	17389659	promoters	0.1875	0.913043	192	92	7.12256e-34	4.89922e-32	0.725543
NM_001166290	chr11	17387847	17389173	introns_1	0.1875	0.913043	192	92	7.12256e-34	4.89922e-32	0.725543
NM_001377297	chr11	17387847	17388840	introns_1	0.1875	0.913043	192	92	7.12256e-34	4.89922e-32	0.725543
NM_001377296	chr11	17388077	17388840	introns_1	0.1875	0.913043	192	92	7.12256e-34	4.89922e-32	0.725543
NM_001111018	chr11	19345312	19350372	introns_1	0.6875	0	80	56	4.56103e-20	1.84966e-18	-0.6875
NR_015384	chr11	19713672	19715672	promoters	0.360248	0	161	58	6.24192e-11	1.31305e-09	-0.360248
NM_001244963	chr11	19713963	19832483	introns_1	0.935484	0	62	24	6.63354e-19	2.48116e-17	-0.935484
NM_001252010	chr11	24496052	24498052	promoters	0	0.208333	96	48	1.24498e-06	1.35214e-05	0.208333
NM_001252008	chr11	24497306	24729172	introns_1	0	0.208333	96	48	1.24498e-06	1.35214e-05	0.208333
NM_001252010	chr11	24497306	24729168	introns_1	0	0.208333	96	48	1.24498e-06	1.35214e-05	0.208333
NM_001384648	chr11	45225995	45235109	exons_2	0.336436	0.942478	752	452	1.52711e-108	6.81226e-106	0.606042
NM_000741	chr11	46383791	46386586	exons_1	0.0422535	1	71	34	4.79977e-26	2.57237e-24	0.957746
NM_001278222	chr11	46935688	46937688	promoters	0.00689655	0.349112	435	338	6.86781e-45	6.59266e-43	0.342216
NM_024113	chr11	46935760	46937760	promoters	0.00689655	0.349112	435	338	6.86781e-45	6.59266e-43	0.342216
NM_024113	chr11	46936761	46936851	exons_1	0.0168067	0.21875	119	64	4.62186e-06	4.44514e-05	0.201943
NM_001251935	chr11	47248865	47259790	introns_1	0.0119048	0.733333	84	30	9.84889e-17	3.22283e-15	0.721429
NM_001130102	chr11	47249000	47259790	introns_1	0.0119048	0.733333	84	30	9.84889e-17	3.22283e-15	0.721429
NM_001363595	chr11	47256706	47258706	promoters	0.0119048	0.733333	84	30	9.84889e-17	3.22283e-15	0.721429
NM_001130101	chr11	47256995	47258995	promoters	0.0119048	0.733333	84	30	9.84889e-17	3.22283e-15	0.721429
NM_001376417	chr11	47565274	47565539	exons_1	0	0.208333	66	48	1.57775e-05	0.000133611	0.208333
NM_001318717	chr11	47577411	47578097	exons_1	0.957816	0.291667	403	192	1.93362e-68	3.11992e-66	-0.66615
NM_001318718	chr11	47577411	47578077	exons_1	0.957816	0.291667	403	192	1.93362e-68	3.11992e-66	-0.66615
NM_001318719	chr11	47577411	47578055	exons_1	0.957816	0.291667	403	192	1.93362e-68	3.11992e-66	-0.66615
NM_001318721	chr11	47577411	47578024	exons_1	0.957816	0.291667	403	192	1.93362e-68	3.11992e-66	-0.66615
NM_001318722	chr11	47577411	47578028	exons_1	0.957816	0.291667	403	192	1.93362e-68	3.11992e-66	-0.66615
NM_001318716	chr11	47577771	47579771	promoters	0.624161	0.207692	447	260	5.56965e-28	3.22423e-26	-0.416469
NM_005161	chr11	57233578	57237453	exons_1	0.0195312	0.971429	256	140	1.54657e-95	4.78711e-93	0.951897
NR_027991	chr11	57235792	57237250	exons_2	0.0195312	0.971429	256	140	1.54657e-95	4.78711e-93	0.951897
NR_027991	chr11	57236250	57238250	promoters	0.0195312	0.971429	256	140	1.54657e-95	4.78711e-93	0.951897
NM_005161	chr11	57236453	57238453	promoters	0.0195312	0.971429	256	140	1.54657e-95	4.78711e-93	0.951897
NM_178570	chr11	57468091	57476161	introns_2	0.96875	0.740741	64	54	0.000177241	0.00114149	-0.228009
NM_001300773	chr11	61533125	61547176	introns_1	0.00833333	1	120	96	4.45789e-64	6.31896e-62	0.991667
NM_004200	chr11	61533125	61551383	introns_1	0.00833333	1	120	96	4.45789e-64	6.31896e-62	0.991667
NM_001252065	chr11	61546256	61551383	introns_1	0.00833333	1	120	96	4.45789e-64	6.31896e-62	0.991667
NM_001365809	chr11	61546256	61547176	introns_1	0.00833333	1	120	96	4.45789e-64	6.31896e-62	0.991667
NM_001363593	chr11	61954234	61956234	promoters	0	0.235294	77	34	6.31577e-06	5.88942e-05	0.235294
NM_004183	chr11	61955202	61955717	introns_3	0	0.235294	77	34	6.31577e-06	5.88942e-05	0.235294
NM_001363593	chr11	61955388	61955717	introns_1	0	0.235294	77	34	6.31577e-06	5.88942e-05	0.235294
NR_106806	chr11	62788814	62790814	promoters	0.795455	0.52	44	50	0.00461531	0.0192626	-0.275455
NM_001080501	chr11	62789971	62790915	exons_1	0.795455	0.52	44	50	0.00461531	0.0192626	-0.275455
NM_000738	chr11	62908679	62911178	exons_1	0.224832	0.965116	298	172	3.00488e-63	4.23954e-61	0.740284
NM_014067	chr11	64015282	64151238	introns_8	0.296633	0.503906	1099	512	1.36552e-15	4.07292e-14	0.207273
NM_001098671	chr11	64742010	64742112	exons_1	0.403226	0	62	56	6.18768e-10	1.16221e-08	-0.403226
NM_001318398	chr11	64742033	64742793	introns_1	0.403226	0	62	56	6.18768e-10	1.16221e-08	-0.403226
NM_130801	chr11	64803514	64804816	exons_1	0.923077	0.16	65	50	2.3809e-18	8.67013e-17	-0.763077
NM_001370259	chr11	64803522	64804816	exons_1	0.923077	0.16	65	50	2.3809e-18	8.67013e-17	-0.763077
NM_017525	chr11	64826671	64826794	exons_3	0.275862	0	116	56	8.79533e-08	1.16252e-06	-0.275862
NM_013265	chr11	65108197	65108914	exons_1	0.497143	0	175	104	2.38484e-24	1.18593e-22	-0.497143
NR_145677	chr11	65180834	65182834	promoters	0.97619	0.24	84	50	3.29021e-21	1.39588e-19	-0.73619
NM_005186	chr11	65180927	65182927	promoters	0.97619	0.24	84	50	3.29021e-21	1.39588e-19	-0.73619
NM_005186	chr11	65182701	65182968	exons_2	0.97619	0.24	84	50	3.29021e-21	1.39588e-19	-0.73619
NM_005186	chr11	65204683	65204858	exons_9	0.991667	0	120	232	1.961e-97	6.5368e-95	-0.991667
NR_028272	chr11	65421797	65423797	promoters	0.284444	0	225	134	1.74016e-16	5.58582e-15	-0.284444
NR_028272	chr11	65422798	65426532	exons_1	0.852941	0	68	54	3.49687e-26	1.88409e-24	-0.852941
NR_131012	chr11	65422798	65445538	exons_1	0.852941	0	68	54	3.49687e-26	1.88409e-24	-0.852941
NM_001048218	chr11	65538442	65538704	exons_5	0.91134	0.0301724	485	464	2.52658e-197	4.03375e-194	-0.881168
NM_006747	chr11	65638183	65640830	introns_1	0.409836	1	61	30	3.13772e-10	6.12086e-09	0.590164
NM_153253	chr11	65639120	65641120	promoters	0.409836	1	61	30	3.13772e-10	6.12086e-09	0.590164
NM_153253	chr11	65640296	65640800	introns_1	0.409836	1	61	30	3.13772e-10	6.12086e-09	0.590164
NM_006747	chr11	65642463	65642639	exons_3	0.447761	0.0952381	134	42	7.6871e-06	7.01928e-05	-0.352523
NM_138368	chr11	65773898	65780342	exons_1	0.629344	0.301587	259	126	1.0784e-09	1.95998e-08	-0.327756
NM_152760	chr11	65852552	65852629	introns_10	0.962264	0.75	53	40	0.00204798	0.00958693	-0.212264
NM_024650	chr11	66743735	66745735	promoters	0	0.3125	80	32	1.45518e-07	1.85546e-06	0.3125
NM_001302084	chr11	66743768	66745768	promoters	0	0.3125	80	32	1.45518e-07	1.85546e-06	0.3125
NM_000920	chr11	66853384	66863773	introns_11	0.946996	0.543689	283	206	2.15115e-27	1.23585e-25	-0.403307
NM_024036	chr11	66857064	66859093	exons_1	0.943662	0.153846	142	104	1.18853e-40	1.05417e-38	-0.789816
NM_001363524	chr11	66857735	66859093	exons_1	0.943662	0.153846	142	104	1.18853e-40	1.05417e-38	-0.789816
NR_073410	chr11	67468017	67468092	exons_1	0.589744	0.28	39	50	0.00310889	0.0137611	-0.309744
NM_001078651	chr11	67468028	67468092	exons_1	0.589744	0.28	39	50	0.00310889	0.0137611	-0.309744
NM_004910	chr11	67494846	67494956	exons_7	0.971631	0.464286	141	56	2.11168e-16	6.67944e-15	-0.507345
NM_016366	chr11	67519793	67519940	exons_2	0.983784	0.0804598	185	174	1.05087e-81	2.27692e-79	-0.903324
NM_016366	chr11	67520051	67520160	exons_3	0.970149	0	67	72	9.29161e-40	7.895e-38	-0.970149
NM_016366	chr11	67522446	67524446	promoters	0.342466	0.947368	73	38	4.72422e-11	9.98638e-10	0.604903
NM_016366	chr11	67523285	67523446	exons_2	0.342466	0.947368	73	38	4.72422e-11	9.98638e-10	0.604903
NR_110766	chr11	70473440	70490302	introns_1	0.975048	0.388393	521	448	1.82784e-101	6.44717e-99	-0.586655
NM_012309	chr11	70485314	70487720	exons_1	0.975048	0.388393	521	448	1.82784e-101	6.44717e-99	-0.586655
NM_001286561	chr11	72035976	72062588	introns_1	0.00793651	0.591549	126	142	2.33611e-30	1.4581e-28	0.583613
NM_006185	chr11	72035976	72069841	introns_1	0.00793651	0.591549	126	142	2.33611e-30	1.4581e-28	0.583613
NM_006645	chr11	72754729	72755142	exons_1	0.978261	0	92	80	1.65279e-49	1.77182e-47	-0.978261
NM_014786	chr11	73361162	73362039	introns_12	0.861111	0.0731707	72	82	7.89743e-26	4.2102e-24	-0.78794
NM_001300943	chr11	76444017	76446017	promoters	0.00660066	0.27451	303	102	6.16439e-17	2.04138e-15	0.267909
NM_020193	chr11	76444024	76446024	promoters	0.00660066	0.27451	303	102	6.16439e-17	2.04138e-15	0.267909
NM_001300943	chr11	76445018	76445128	exons_1	0.00660066	0.27451	303	102	6.16439e-17	2.04138e-15	0.267909
NM_020193	chr11	76445025	76445128	exons_1	0.00660066	0.27451	303	102	6.16439e-17	2.04138e-15	0.267909
NM_001351275	chr11	84534729	85154555	introns_1	0	0.241379	125	58	3.72295e-09	6.16104e-08	0.241379
NM_001142699	chr11	84534732	85111660	introns_1	0	0.241379	125	58	3.72295e-09	6.16104e-08	0.241379
NM_001351274	chr11	84534732	85154555	introns_1	0	0.241379	125	58	3.72295e-09	6.16104e-08	0.241379
NM_001377968	chr11	84534732	84923076	introns_1	0	0.241379	125	58	3.72295e-09	6.16104e-08	0.241379
NM_001377968	chr11	84922421	84924421	promoters	0	0.241379	125	58	3.72295e-09	6.16104e-08	0.241379
NM_001351934	chr11	86556553	86556702	exons_2	0.934211	0.730392	380	408	3.87637e-15	1.1135e-13	-0.203818
NM_001301007	chr11	94768561	94799389	introns_1	0.0169492	0.357143	59	28	1.0565e-05	9.41749e-05	0.340194
NM_130847	chr11	94768561	94795010	introns_1	0.0169492	0.357143	59	28	1.0565e-05	9.41749e-05	0.340194
NM_001018011	chr11	114156435	114186951	introns_3	0.57265	0.896552	117	58	4.34612e-06	4.20259e-05	0.323902
NM_020693	chr11	117443886	117444039	exons_13	0.973913	0.297619	115	168	2.32362e-35	1.68221e-33	-0.676294
NM_020693	chr11	117780493	117780810	exons_6	0.887006	0.0833333	177	168	7.72704e-58	9.88995e-56	-0.803672
NM_144765	chr11	118262438	118262648	exons_2	0.00851064	1	235	116	1.83999e-94	5.58143e-92	0.991489
NM_001382612	chr11	119116025	119118544	exons_1	0.683417	0.029661	398	472	3.69338e-106	1.51399e-103	-0.653756
NM_001290474	chr11	119116045	119118544	exons_1	0.683417	0.029661	398	472	3.69338e-106	1.51399e-103	-0.653756
NM_004205	chr11	119357187	119357307	exons_2	0.976744	0.108696	86	92	1.55521e-37	1.24475e-35	-0.868049
NM_001370222	chr11	130239897	130314374	introns_1	0.32342	0.887755	269	392	4.48172e-53	5.16915e-51	0.564335
NM_014155	chr11	130260856	130261929	exons_1	0.426471	0.966667	204	360	2.04724e-50	2.24191e-48	0.540196
NM_001170738	chr12	163494	163619	exons_4	0.956897	0.0571429	116	140	1.51557e-56	1.89972e-54	-0.899754
NM_173593	chr12	553194	553983	exons_14	0.347826	0.985714	138	140	2.7148e-35	1.96073e-33	0.637888
NM_001297422	chr12	916206	916535	exons_1	0.916667	0.0606061	48	66	5.47375e-23	2.50439e-21	-0.856061
NM_001297419	chr12	916344	916483	exons_1	0.916667	0.0606061	48	66	5.47375e-23	2.50439e-21	-0.856061
NM_001144958	chr12	3627436	3627550	exons_4	0.631068	1	103	80	7.78621e-13	1.84954e-11	0.368932
NM_001346091	chr12	6333866	6341775	introns_1	0	0.894737	32	76	1.27933e-21	5.56775e-20	0.894737
NM_001346092	chr12	6334245	6341775	introns_2	0	0.894737	32	76	1.27933e-21	5.56775e-20	0.894737
NM_001346092	chr12	6341076	6343076	promoters	0	0.894737	32	76	1.27933e-21	5.56775e-20	0.894737
NM_002824	chr12	6770392	6770952	exons_3	0.258993	0.933333	278	60	8.96872e-24	4.2979e-22	0.674341
NM_019858	chr12	6826653	6827420	exons_3	0.0696517	0.929577	201	142	6.87454e-66	1.03234e-63	0.859926
NM_001352061	chr12	25194160	25196160	promoters	0	0.37931	69	58	2.42053e-10	4.77092e-09	0.37931
NM_001001660	chr12	25194236	25196236	promoters	0	0.37931	69	58	2.42053e-10	4.77092e-09	0.37931
NM_001001660	chr12	25195338	25203919	introns_1	0	0.37931	69	58	2.42053e-10	4.77092e-09	0.37931
NM_001144882	chr12	42456757	42460665	exons_1	0.96319	0.462121	326	264	1.24637e-47	1.27728e-45	-0.501069
NM_003394	chr12	48965340	48966553	exons_1	0	0.989011	182	182	5.96738e-107	2.51409e-104	0.989011
NM_001368048	chr12	49794765	49797394	exons_6	0.0869565	1	69	88	5.16116e-39	4.34885e-37	0.913043
NM_020039	chr12	50056595	50058595	promoters	0	0.25	130	80	8.61441e-11	1.78368e-09	0.25
NM_020039	chr12	50057917	50058750	introns_1	0	0.25	130	80	8.61441e-11	1.78368e-09	0.25
NM_173157	chr12	52051569	52054326	introns_1	0.114943	0.466667	87	60	1.59019e-06	1.67956e-05	0.351724
NM_002135	chr12	52052646	52054326	introns_1	0.114943	0.466667	87	60	1.59019e-06	1.67956e-05	0.351724
NM_033033	chr12	52405335	52407335	promoters	0.45	0.970149	40	134	8.30328e-14	2.13995e-12	0.520149
NM_033033	chr12	52405867	52406335	exons_9	0.45	0.970149	40	134	8.30328e-14	2.13995e-12	0.520149
NM_001173467	chr12	53326576	53329420	exons_1	0.00840336	1	238	52	1.49107e-57	1.90043e-55	0.991597
NM_017410	chr12	53945000	53946544	exons_1	0.00667557	0.27381	749	168	1.53488e-31	9.92732e-30	0.267134
NR_047518	chr12	53966378	53968616	introns_1	0.015625	0.919355	192	124	1.01712e-70	1.78343e-68	0.90373
NR_047517	chr12	53967395	53968616	introns_1	0.015625	0.919355	192	124	1.01712e-70	1.78343e-68	0.90373
NR_003716	chr12	53967756	53969756	promoters	0.015625	0.919355	192	124	1.01712e-70	1.78343e-68	0.90373
NR_047518	chr12	53967914	53969914	promoters	0.015625	0.919355	192	124	1.01712e-70	1.78343e-68	0.90373
NM_022658	chr12	54011089	54012769	exons_2	0.382979	0.765432	94	162	1.116e-09	2.02347e-08	0.382453
NM_001243788	chr12	54180358	54182623	exons_1	0.0531309	0.941176	527	238	3.84086e-142	3.23635e-139	0.888046
NM_001243790	chr12	54181648	54182503	introns_1	0.0606061	0.927083	429	192	1.50534e-108	6.81226e-106	0.866477
NM_001351261	chr12	54182171	54182503	introns_1	0.0606061	0.927083	429	192	1.50534e-108	6.81226e-106	0.866477
NM_001351258	chr12	54182306	54182623	exons_1	0.0531309	0.941176	527	238	3.84086e-142	3.23635e-139	0.888046
NM_001243790	chr12	54182504	54182623	exons_1	0.0204082	1	98	46	1.68136e-37	1.34217e-35	0.979592
NM_001130967	chr12	54370626	54370721	exons_2	0.433333	0	120	58	1.0088e-12	2.38325e-11	-0.433333
NM_001130968	chr12	54371097	54373972	introns_1	0.948276	0.714286	116	56	3.17625e-05	0.000249996	-0.23399
NM_001130967	chr12	54371716	54373972	introns_1	0.948276	0.714286	116	56	3.17625e-05	0.000249996	-0.23399
NM_001982	chr12	56101529	56103505	exons_26	0.714286	0.967213	119	122	1.21886e-08	1.8787e-07	0.252927
NM_007264	chr12	56995194	56998447	exons_2	0.0204082	0.947368	49	38	4.66961e-22	2.05585e-20	0.92696
NM_001178081	chr12	57099294	57099440	exons_7	0.0408163	0.769231	49	26	1.20454e-11	2.67879e-10	0.728414
NM_001178081	chr12	57102922	57104463	introns_11	0	1	85	60	1.10714e-44	1.05943e-42	1
NM_001330187	chr12	64875001	64881018	exons_1	0.0242718	0.902778	206	144	2.84098e-73	5.35268e-71	0.878506
NM_001330188	chr12	64875001	64881033	exons_1	0.0242718	0.902778	206	144	2.84098e-73	5.35268e-71	0.878506
NM_001330186	chr12	64875073	64881033	exons_1	0.0242718	0.902778	206	144	2.84098e-73	5.35268e-71	0.878506
NM_001379349	chr12	66596928	67069049	introns_1	0.0438596	0.40566	114	212	1.80988e-14	4.90625e-13	0.361801
NM_001379348	chr12	66596928	66804052	introns_1	0.0689655	0.5	29	64	1.41905e-05	0.000122659	0.431034
NM_001379348	chr12	66803269	66805269	promoters	0.0438596	0.40566	114	212	1.80988e-14	4.90625e-13	0.361801
NM_001379348	chr12	66804053	66804269	exons_1	0.0352941	0.364865	85	148	4.06064e-10	7.84057e-09	0.329571
NM_002480	chr12	79872939	79934694	introns_1	0	0.392857	51	56	6.47058e-09	1.03468e-07	0.392857
NM_000899	chr12	88545866	88580263	introns_5	0	0.214286	118	56	6.73557e-08	9.07671e-07	0.214286
NM_152323	chr12	101486344	101486997	exons_6	0.942857	0.0909091	70	44	2.35064e-22	1.04859e-20	-0.851948
NM_001017523	chr12	107610190	107610355	exons_3	0	0.923077	158	104	1.44743e-64	2.13138e-62	0.923077
NM_014653	chr12	108195282	108196214	exons_1	0.037594	0.981651	532	436	3.17789e-238	8.76347e-235	0.944057
NM_021625	chr12	109814828	109833349	introns_1	0.0425532	0.545455	47	44	1.78944e-08	2.6713e-07	0.502901
NR_039718	chr12	109832347	109834347	promoters	0.0425532	0.545455	47	44	1.78944e-08	2.6713e-07	0.502901
NM_021625	chr12	109832398	109834398	promoters	0.0425532	0.545455	47	44	1.78944e-08	2.6713e-07	0.502901
NM_001370598	chr12	111320012	111320775	exons_8	0.95	0	80	38	2.44809e-28	1.4336e-26	-0.95
NM_002535	chr12	112977518	112979518	promoters	0.946667	0.115385	75	52	5.99001e-24	2.90257e-22	-0.831282
NM_000928	chr12	120325861	120326020	exons_3	0.0276074	0.371795	326	156	1.2549e-23	5.95715e-22	0.344188
NR_033953	chr12	121184305	121188032	exons_2	0.242424	1	33	32	1.48998e-12	3.50364e-11	0.757576
NM_001270485	chr12	121237692	121240869	exons_1	0.246575	0	73	36	5.89222e-05	0.000430064	-0.246575
NM_001270486	chr12	121240543	121244572	introns_1	0.246575	0	73	36	5.89222e-05	0.000430064	-0.246575
NM_032590	chr12	121442157	121442836	exons_4	0.988764	0	89	76	4.00257e-49	4.26014e-47	-0.988764
NM_173855	chr12	121668654	121670654	promoters	0.402367	0.791667	169	96	3.60328e-10	7.00204e-09	0.3893
NM_001363685	chr12	121669339	121669512	exons_6	0.402367	0.791667	169	96	3.60328e-10	7.00204e-09	0.3893
NM_173855	chr12	121669339	121669654	exons_1	0.402367	0.791667	169	96	3.60328e-10	7.00204e-09	0.3893
NM_001080825	chr12	121775609	121782068	exons_12	0.664286	1	140	80	1.92313e-12	4.49085e-11	0.335714
NM_019034	chr12	121780872	121781006	exons_2	0.664286	1	140	80	1.92313e-12	4.49085e-11	0.335714
NM_001366854	chr12	125186867	125349451	introns_1	0.00625	0.458824	160	170	3.52789e-27	2.01156e-25	0.452574
NM_001366854	chr12	125650683	125650953	exons_2	0.113636	0.982456	132	228	7.43503e-73	1.38365e-70	0.86882
NM_003565	chr12	131895825	131906891	introns_3	0.979592	0	49	34	2.94703e-24	1.44552e-22	-0.979592
NM_001142641	chr12	132508351	132525733	introns_1	0.983333	0.461538	120	52	2.59627e-16	8.12748e-15	-0.521795
NR_168498	chr12	132509166	132511955	exons_1	0.983333	0.461538	120	52	2.59627e-16	8.12748e-15	-0.521795
NM_138575	chr12	132717987	132718120	exons_1	0.965217	0.32	115	50	2.67192e-19	1.0106e-17	-0.645217
NM_001170544	chr12	132717990	132718120	exons_1	0.965217	0.32	115	50	2.67192e-19	1.0106e-17	-0.645217
NM_001363647	chr13	20432297	20489369	introns_4	0.986301	0	73	54	2.25107e-37	1.77823e-35	-0.986301
NM_015974	chr13	20439755	20489369	introns_1	0.986301	0	73	54	2.25107e-37	1.77823e-35	-0.986301
NM_014572	chr13	20987881	20989304	exons_5	0.952153	0.00662252	209	302	2.77447e-128	1.79066e-125	-0.945531
NM_001331126	chr13	27273027	27275188	exons_4	0.9	0.533333	140	60	1.84744e-08	2.75247e-07	-0.366667
NR_073109	chr13	39037310	39039310	promoters	0.37931	0	116	74	6.58925e-13	1.57509e-11	-0.37931
NM_001012754	chr13	39037455	39039455	promoters	0.37931	0	116	74	6.58925e-13	1.57509e-11	-0.37931
NR_073109	chr13	39039136	39039288	exons_1	0.37931	0	116	74	6.58925e-13	1.57509e-11	-0.37931
NM_001286272	chr13	45340185	45340711	introns_1	0	0.214286	253	84	3.01079e-13	7.38312e-12	0.214286
NM_152719	chr13	45713182	45714559	exons_1	0.664452	0	301	222	9.15703e-70	1.55178e-67	-0.664452
NM_001164213	chr13	46553704	46650200	introns_1	0	0.266667	72	60	1.26821e-07	1.63423e-06	0.266667
NM_001322349	chr13	72780900	72782900	promoters	0	0.202797	273	286	4.58603e-20	1.85484e-18	0.202797
NR_146206	chr13	72781132	72783132	promoters	0	0.202797	273	286	4.58603e-20	1.85484e-18	0.202797
NM_001286818	chr13	73061861	73062734	exons_1	0.971429	0.291667	70	48	9.58343e-17	3.15639e-15	-0.679762
NM_001286818	chr13	73075708	73077542	exons_3	0.0212766	0.96875	94	64	3.36466e-40	2.92445e-38	0.947473
NM_001730	chr13	73075708	73077538	exons_1	0.0212766	0.96875	94	64	3.36466e-40	2.92445e-38	0.947473
NM_005708	chr13	94403015	94408019	exons_5	0.305556	0.95	36	80	1.64947e-13	4.16265e-12	0.644444
NM_005766	chr13	98395227	98395476	exons_11	1	0	63	34	3.63764e-29	2.18504e-27	-1
NM_005766	chr13	98395477	98409337	introns_11	0.984127	0	63	34	3.53956e-27	2.01443e-25	-0.984127
NR_036532	chr13	99199755	99201755	promoters	0	0.346154	34	52	4.22964e-06	4.09648e-05	0.346154
NR_036531	chr13	99199757	99201757	promoters	0	0.346154	34	52	4.22964e-06	4.09648e-05	0.346154
NM_177967	chr13	99199853	99201853	promoters	0	0.346154	34	52	4.22964e-06	4.09648e-05	0.346154
NR_036531	chr13	99200366	99200757	exons_1	0	0.346154	34	52	4.22964e-06	4.09648e-05	0.346154
NR_036532	chr13	99200638	99200755	exons_1	0	0.346154	34	52	4.22964e-06	4.09648e-05	0.346154
NM_001321939	chr13	101868829	102401470	introns_1	0.259259	0	27	50	6.29821e-05	0.000453585	-0.259259
NM_001321931	chr13	101875297	102193122	introns_1	0.259259	0	27	50	6.29821e-05	0.000453585	-0.259259
NM_001321934	chr13	101875297	102310470	introns_1	0.259259	0	27	50	6.29821e-05	0.000453585	-0.259259
NM_001321935	chr13	101875297	102317635	introns_1	0.259259	0	27	50	6.29821e-05	0.000453585	-0.259259
NM_001321936	chr13	101875297	102193036	introns_1	0.259259	0	27	50	6.29821e-05	0.000453585	-0.259259
NM_001321938	chr13	101875297	102220696	introns_1	0.259259	0	27	50	6.29821e-05	0.000453585	-0.259259
NM_001321941	chr13	101875297	102293973	introns_1	0.259259	0	27	50	6.29821e-05	0.000453585	-0.259259
NM_001321942	chr13	101875297	102393757	introns_1	0.259259	0	27	50	6.29821e-05	0.000453585	-0.259259
NM_001321943	chr13	101875297	102205866	introns_1	0.259259	0	27	50	6.29821e-05	0.000453585	-0.259259
NM_001321946	chr13	101875297	102366444	introns_1	0.259259	0	27	50	6.29821e-05	0.000453585	-0.259259
NM_001321948	chr13	101875297	102401470	introns_1	0.259259	0	27	50	6.29821e-05	0.000453585	-0.259259
NM_004115	chr13	101915945	101917945	promoters	0.259259	0	27	50	6.29821e-05	0.000453585	-0.259259
NM_004115	chr13	101916453	101916945	exons_1	0.259259	0	27	50	6.29821e-05	0.000453585	-0.259259
NM_001372057	chr13	106489746	106493428	exons_1	0.0493827	0.884615	81	156	4.1581e-40	3.60376e-38	0.835233
NM_001198950	chr13	109127282	109127550	exons_31	0.971193	0.0178571	243	224	3.34874e-120	1.84692e-117	-0.953336
NR_120385	chr13	113351971	113361558	introns_1	0.981481	0.0166667	270	240	9.20279e-136	6.34448e-133	-0.964815
NR_046541	chr13	113355166	113356121	exons_1	0.981481	0.0166667	270	240	9.20279e-136	6.34448e-133	-0.964815
NM_001286733	chr13	113355323	113355481	exons_1	0.981481	0.0166667	270	240	9.20279e-136	6.34448e-133	-0.964815
NM_002929	chr13	113732884	113733085	exons_6	0.977941	0.340909	136	88	4.71612e-28	2.73535e-26	-0.637032
NM_001278530	chr14	21073932	21074991	exons_1	0.025	1	80	68	2.33404e-42	2.11345e-40	0.975
NM_018071	chr14	21073932	21075180	exons_1	0.025	1	80	68	2.33404e-42	2.11345e-40	0.975
NM_001344	chr14	22588947	22589224	exons_3	0	0.205882	260	204	6.32538e-18	2.2389e-16	0.205882
NR_169511	chr14	23057660	23058042	exons_1	0	0.204545	130	88	3.14659e-09	5.31155e-08	0.204545
NM_001805	chr14	23118255	23120255	promoters	0.0555556	1	72	30	2.58648e-23	1.20705e-21	0.944444
NM_001805	chr14	23118582	23119255	exons_2	0.0555556	1	72	30	2.58648e-23	1.20705e-21	0.944444
NM_001267036	chr14	23143205	23155165	introns_1	0.909091	0	33	44	8.83283e-20	3.47066e-18	-0.909091
NM_012244	chr14	23143205	23165284	introns_1	0.909091	0	33	44	8.83283e-20	3.47066e-18	-0.909091
NM_182728	chr14	23153393	23155393	promoters	0.909091	0	33	44	8.83283e-20	3.47066e-18	-0.909091
NM_001267037	chr14	23153450	23155450	promoters	0.909091	0	33	44	8.83283e-20	3.47066e-18	-0.909091
NR_049767	chr14	23154320	23156320	promoters	0.909091	0	33	44	8.83283e-20	3.47066e-18	-0.909091
NM_022789	chr14	23375625	23376403	exons_1	0.787234	1	47	76	5.36668e-06	5.08073e-05	0.212766
NM_033400	chr14	23523203	23526679	exons_2	0.0909091	1	66	38	7.17778e-24	3.45604e-22	0.909091
NM_032452	chr14	23577790	23579790	promoters	0.0138889	0.236842	72	76	9.02003e-06	8.14811e-05	0.222953
NM_203402	chr14	24130465	24132465	promoters	0.00729927	0.857143	137	42	1.8605e-31	1.19823e-29	0.849844
NM_203402	chr14	24132211	24132849	exons_2	0.00729927	0.928571	274	84	3.802e-70	6.59027e-68	0.921272
NM_025081	chr14	24407869	24408527	exons_3	0.133663	0.891304	202	92	6.92259e-38	5.66011e-36	0.757641
NR_169588	chr14	38256446	38277949	introns_1	0.0136364	0.3	220	60	3.05306e-11	6.55888e-10	0.286364
NM_002687	chr14	39175254	39175392	exons_1	0	0.210526	118	228	3.36739e-11	7.20864e-10	0.210526
NR_131171	chr14	50047590	50052773	introns_6	0.0612245	1	98	34	3.18032e-27	1.8168e-25	0.938776
NM_015163	chr14	50982104	50998049	introns_3	0.914062	0.0416667	128	240	1.02555e-70	1.78787e-68	-0.872396
NM_001202	chr14	53949736	53950888	exons_1	0.711475	0.927835	305	194	5.8625e-10	1.10799e-08	0.21636
NM_139318	chr14	62802329	62802581	exons_2	0.979079	0.482759	239	174	8.93306e-36	6.59308e-34	-0.496321
NM_001161498	chr14	69527783	69527932	exons_12	0.0168856	1	533	180	1.67711e-161	2.21189e-158	0.983114
NR_110315	chr14	75069750	75077531	introns_1	0.0260417	0.431818	192	88	1.02863e-17	3.59888e-16	0.405777
NM_001042430	chr14	75070555	75071396	exons_1	0.0260417	0.431818	192	88	1.02863e-17	3.59888e-16	0.405777
NM_001330191	chr14	75070555	75071738	exons_1	0.0260417	0.431818	192	88	1.02863e-17	3.59888e-16	0.405777
NM_024643	chr14	75070555	75071911	exons_1	0.0260417	0.431818	192	88	1.02863e-17	3.59888e-16	0.405777
NM_001364172	chr14	77139213	77139752	exons_2	0.8375	0.0165289	320	242	1.10763e-100	3.7332e-98	-0.820971
NM_001366425	chr14	78242391	78243802	exons_2	0.0314961	1	127	82	8.59886e-56	1.06032e-53	0.968504
NM_001366850	chr14	81276901	81278739	exons_2	0.170213	1	94	34	2.316e-20	9.44268e-19	0.829787
NR_144386	chr14	85529024	85531024	promoters	0	0.222222	122	72	4.93854e-09	8.02817e-08	0.222222
NM_001346146	chr14	85529143	85531143	promoters	0	0.222222	122	72	4.93854e-09	8.02817e-08	0.222222
NR_144386	chr14	85530025	85530534	exons_1	0	0.222222	122	72	4.93854e-09	8.02817e-08	0.222222
NM_001346144	chr14	85530144	85530556	exons_1	0	0.222222	122	72	4.93854e-09	8.02817e-08	0.222222
NM_013231	chr14	85530144	85530534	exons_1	0	0.222222	122	72	4.93854e-09	8.02817e-08	0.222222
NM_001322231	chr14	90847861	90872322	exons_1	0.97619	0.684211	42	76	2.68689e-05	0.000213754	-0.29198
NM_001207071	chr14	93918995	93928198	introns_1	0.133858	0.684211	127	38	9.45368e-11	1.94287e-09	0.550352
NM_138344	chr14	93925371	93928198	introns_1	0.133858	0.684211	127	38	9.45368e-11	1.94287e-09	0.550352
NR_027004	chr14	93925372	93927372	promoters	0.133858	0.684211	127	38	9.45368e-11	1.94287e-09	0.550352
NM_001207074	chr14	93926343	93928343	promoters	0.133858	0.684211	127	38	9.45368e-11	1.94287e-09	0.550352
NM_001134888	chr14	100879753	100884874	exons_1	0.970223	0.0652174	403	184	5.29093e-118	2.63106e-115	-0.905006
NR_029965	chr14	100880006	100882006	promoters	0.959596	0.015625	198	128	5.87664e-79	1.18054e-76	-0.943971
NR_029966	chr14	100880885	100882885	promoters	0.959596	0.015625	198	128	5.87664e-79	1.18054e-76	-0.943971
NR_029966	chr14	100881886	100881978	exons_1	0.959596	0.015625	198	128	5.87664e-79	1.18054e-76	-0.943971
NR_029696	chr14	100881978	100883978	promoters	0.980488	0.178571	205	56	2.46989e-37	1.93596e-35	-0.801916
NR_030173	chr14	100883482	100885482	promoters	0.980488	0.178571	205	56	2.46989e-37	1.93596e-35	-0.801916
NR_029699	chr14	100883701	100885701	promoters	0.980488	0.178571	205	56	2.46989e-37	1.93596e-35	-0.801916
NM_015656	chr14	104171936	104172574	introns_6	0.968085	0	94	36	1.31689e-30	8.28769e-29	-0.968085
NM_001370342	chr14	104801181	104804711	exons_1	0.0980392	0.333333	51	30	0.00954899	0.0358666	0.235294
NM_015307	chr15	29196565	29252367	introns_8	0.00796813	0.729167	251	96	1.56395e-49	1.68829e-47	0.721199
NM_001382637	chr15	31487452	31487566	exons_3	0.0212766	0.904762	94	84	2.93014e-39	2.48276e-37	0.883485
NM_001277313	chr15	33065075	33088798	introns_1	0	1	233	106	1.34069e-93	3.91042e-91	1
NM_001103184	chr15	33066511	33068174	exons_1	0	1	233	106	1.34069e-93	3.91042e-91	1
NM_001103184	chr15	33067174	33069174	promoters	0	1	233	106	1.34069e-93	3.91042e-91	1
NM_020371	chr15	34038780	34039204	exons_2	0	0.533333	46	30	1.32792e-09	2.38208e-08	0.533333
NM_020660	chr15	34751034	34753372	exons_1	0.572008	0.0657895	493	304	1.78814e-53	2.08621e-51	-0.506219
NM_020857	chr15	40899144	40901014	exons_4	0.742857	0.977778	245	90	2.39546e-08	3.48842e-07	0.234921
NR_073597	chr15	50118233	50120233	promoters	0.00775194	0.946429	129	112	3.1399e-61	4.30976e-59	0.938677
NM_032866	chr15	57437985	57439601	exons_1	0.212121	0	33	36	0.000820819	0.00441389	-0.212121
NM_020962	chr15	65385831	65386059	exons_3	0.937063	0	143	186	4.33013e-84	9.80225e-82	-0.937063
NM_001323936	chr15	66293337	66294987	introns_1	0.025	0.263158	40	38	0.00132302	0.00665989	0.238158
NM_133375	chr15	66293368	66294987	introns_1	0.025	0.263158	40	38	0.00132302	0.00665989	0.238158
NR_120345	chr15	67834308	67835781	exons_1	0.585586	0.0625	111	32	1.46417e-08	2.21738e-07	-0.523086
NM_018357	chr15	70829131	70833116	exons_1	0.0550459	0.907895	109	152	1.40564e-49	1.52827e-47	0.852849
NM_001286741	chr15	74460668	74461188	exons_1	0	0.221154	184	208	1.44957e-15	4.28987e-14	0.221154
NM_001286742	chr15	74461037	74461188	exons_2	0	0.221154	184	208	1.44957e-15	4.28987e-14	0.221154
NM_001286739	chr15	74461108	74461188	exons_1	0	0.221154	184	208	1.44957e-15	4.28987e-14	0.221154
NM_001286740	chr15	74461158	74461188	exons_1	0	0.221154	184	208	1.44957e-15	4.28987e-14	0.221154
NM_003992	chr15	74622120	74622216	exons_3	0.975	0.642857	160	112	3.62477e-14	9.61975e-13	-0.332143
NM_021819	chr15	74816157	74816311	exons_2	0.989796	0	98	38	6.89968e-35	4.94787e-33	-0.989796
NM_181877	chr15	84620602	84623716	exons_1	0.0140845	0.965517	355	232	3.29416e-146	3.22339e-143	0.951433
NM_005928	chr15	88907195	88907376	exons_5	0.988636	0.583333	88	144	6.44857e-15	1.82303e-13	-0.405303
NM_198526	chr15	90073071	90073262	exons_2	0.509091	0.857143	55	56	5.67288e-05	0.000416763	0.348052
NR_120372	chr15	90641258	90713166	introns_1	0.666667	1	39	52	5.75369e-07	6.57125e-06	0.333333
NM_022769	chr15	90641932	90645345	exons_1	0.666667	1	39	52	5.75369e-07	6.57125e-06	0.333333
NM_001042574	chr15	90641935	90645345	exons_1	0.666667	1	39	52	5.75369e-07	6.57125e-06	0.333333
NM_001323619	chr15	90934631	90935286	introns_1	0	0.25	124	24	1.43981e-06	1.53408e-05	0.25
NM_001330416	chr15	92444636	92444929	exons_3	0.178947	1	95	38	1.35296e-21	5.87975e-20	0.821053
NM_003933	chr16	1342181	1342283	exons_6	0.916667	0.645161	60	62	0.000192739	0.00122904	-0.271505
NM_001351846	chr16	1492359	1494359	promoters	0.233083	0	133	24	0.000666747	0.00367796	-0.233083
NM_016111	chr16	1494246	1494616	exons_1	0.233083	0	133	24	0.000666747	0.00367796	-0.233083
NM_001351846	chr16	1494281	1494616	exons_1	0.233083	0	133	24	0.000666747	0.00367796	-0.233083
NM_001040439	chr16	1729487	1729578	exons_4	0.961905	0	105	70	2.25264e-46	2.21856e-44	-0.961905
NM_001324081	chr16	1780822	1782822	promoters	0.519084	0.1	131	60	4.06056e-09	6.6946e-08	-0.419084
NM_001324081	chr16	1781358	1781495	exons_6	0.519084	0.1	131	60	4.06056e-09	6.6946e-08	-0.419084
NM_005061	chr16	1943974	1944893	exons_1	0.396226	1	106	128	1.32985e-30	8.35188e-29	0.603774
NR_135175	chr16	2090435	2092435	promoters	0.956989	0	93	60	5.97548e-40	5.12035e-38	-0.956989
NM_000296	chr16	2091423	2091597	exons_4	0.956989	0	93	60	5.97548e-40	5.12035e-38	-0.956989
NR_135175	chr16	2091436	2091614	exons_1	0.956989	0	93	60	5.97548e-40	5.12035e-38	-0.956989
NM_001385462	chr16	2785799	2785961	exons_2	0.759615	0	104	88	1.75678e-33	1.19485e-31	-0.759615
NM_022468	chr16	3050009	3050144	exons_3	0.7125	0.941176	80	68	0.000163587	0.00106079	0.228676
NR_024167	chr16	3110955	3114794	introns_1	0	0.545455	111	44	1.30924e-17	4.49769e-16	0.545455
NM_001278158	chr16	3111578	3113578	promoters	0	0.545455	111	44	1.30924e-17	4.49769e-16	0.545455
NM_001042428	chr16	3111585	3113585	promoters	0	0.545455	111	44	1.30924e-17	4.49769e-16	0.545455
NM_001278158	chr16	3112579	3112950	exons_1	0	0.545455	111	44	1.30924e-17	4.49769e-16	0.545455
NM_001042428	chr16	3112586	3112682	exons_1	0	0.545455	111	44	1.30924e-17	4.49769e-16	0.545455
NM_002705	chr16	4910950	4936983	introns_21	0	0.230769	43	26	0.000369589	0.00218073	0.230769
NM_144674	chr16	10693930	10695930	promoters	0.00896861	1	223	96	1.30951e-82	2.85775e-80	0.991031
NM_144674	chr16	10694310	10694930	exons_7	0.00896861	1	223	96	1.30951e-82	2.85775e-80	0.991031
NM_001286403	chr16	10904813	10908982	introns_1	0.983193	0.36	119	50	4.85567e-20	1.95607e-18	-0.623193
NR_104444	chr16	10904813	10910187	introns_1	0.983193	0.36	119	50	4.85567e-20	1.95607e-18	-0.623193
NM_000246	chr16	10906499	10908149	exons_1	0.983193	0.36	119	50	4.85567e-20	1.95607e-18	-0.623193
NM_145659	chr16	28501976	28502134	exons_2	0.986667	0.571429	75	56	1.86661e-10	3.72266e-09	-0.415238
NM_001142450	chr16	28979155	28979306	exons_3	0.740741	0.948718	162	78	2.77043e-05	0.000220168	0.207977
NM_001276276	chr16	29806894	29808569	introns_1	0.245455	0.010101	220	594	4.53771e-27	2.54902e-25	-0.235354
NR_074080	chr16	29806894	29808229	introns_1	0.245455	0.010101	220	594	4.53771e-27	2.54902e-25	-0.235354
NM_002383	chr16	29806978	29807828	exons_1	0.245455	0.010101	220	594	4.53771e-27	2.54902e-25	-0.235354
NM_001293205	chr16	29844493	29844879	exons_1	0.6	1	90	66	5.78357e-12	1.31316e-10	0.4
NM_001114100	chr16	29876756	29876950	exons_4	0.373563	0	174	108	5.99441e-18	2.12423e-16	-0.373563
NM_145271	chr16	30569701	30570436	exons_1	0.942857	0	70	104	1.78552e-45	1.73596e-43	-0.942857
NM_001286572	chr16	30773938	30776307	exons_1	0.825581	0	86	30	3.98853e-18	1.43351e-16	-0.825581
NM_001080417	chr16	30778456	30784254	exons_1	0.272212	0.0134228	529	298	6.9867e-27	3.87449e-25	-0.258789
NM_001345970	chr16	30778456	30784273	exons_1	0.272212	0.0134228	529	298	6.9867e-27	3.87449e-25	-0.258789
NM_001288767	chr16	31457303	31459303	promoters	0.218391	0	87	32	0.000282592	0.00172201	-0.218391
NM_001288767	chr16	31458304	31458501	exons_1	0.218391	0	87	32	0.000282592	0.00172201	-0.218391
NM_003041	chr16	31487320	31487400	exons_6	0.981132	0	53	52	2.40427e-31	1.54188e-29	-0.981132
NM_001271620	chr16	49730972	49789486	introns_1	0.95122	0.333333	41	54	5.07991e-11	1.07084e-09	-0.617886
NM_001128850	chr16	66921679	66922353	exons_1	0.957143	0.109589	210	146	1.94192e-67	2.97506e-65	-0.847554
NM_004165	chr16	66921685	66922353	exons_1	0.957143	0.109589	210	146	1.94192e-67	2.97506e-65	-0.847554
NM_001950	chr16	67191154	67193154	promoters	0.465116	0.189189	86	74	0.000182112	0.00117038	-0.275927
NM_001950	chr16	67193009	67193170	exons_3	0.465116	0.189189	86	74	0.000182112	0.00117038	-0.275927
NM_013241	chr16	67239455	67247209	introns_10	0.327869	0	61	32	9.33581e-06	8.41332e-05	-0.327869
NM_001323975	chr16	67256911	67257113	exons_3	0.688356	1	292	80	6.7832e-13	1.6189e-11	0.311644
NM_001172772	chr16	70659618	70659753	exons_1	0.786885	1	61	38	0.000203913	0.00129404	0.213115
NM_001164766	chr16	72793255	72798714	exons_2	0.669154	0.956522	402	322	1.15846e-24	5.86656e-23	0.287368
NR_038234	chr16	73387255	73420092	introns_1	0.928571	0.0566038	42	106	1.2438e-26	6.88492e-25	-0.871968
NM_194436	chr16	75114526	75114685	exons_1	0.785714	0	182	68	5.6027e-35	4.0273e-33	-0.785714
NM_001257	chr16	82627138	82858361	introns_1	0.797753	1	89	188	4.04483e-11	8.59214e-10	0.202247
NM_001220488	chr16	82639466	82858361	introns_1	0.797753	1	89	188	4.04483e-11	8.59214e-10	0.202247
NR_110938	chr16	82773490	82823211	introns_1	0.797753	1	89	188	4.04483e-11	8.59214e-10	0.202247
NM_172347	chr16	84221135	84223020	exons_1	0.017094	1	234	80	1.72583e-72	3.19215e-70	0.982906
NM_172347	chr16	84236730	84237525	exons_2	0.0117647	0.428571	85	42	4.33306e-10	8.32947e-09	0.416807
NR_024406	chr16	86338833	86345491	introns_6	0.0689655	0.928571	58	28	1.88834e-16	6.0106e-15	0.859606
NM_153025	chr16	89657836	89658247	introns_1	0	0.25	74	56	3.68834e-07	4.36869e-06	0.25
NM_052988	chr16	89685688	89687688	promoters	0	0.216667	72	120	2.21052e-07	2.73243e-06	0.216667
NM_001321364	chr17	1628794	1628834	exons_1	0.00492611	0.3125	203	96	2.30949e-16	7.28991e-15	0.307574
NR_029494	chr17	1712987	1714987	promoters	0.292308	0.0681818	195	88	5.53197e-06	5.21301e-05	-0.224126
NM_001171167	chr17	4986287	4986953	introns_2	0.347222	0	72	58	4.72082e-09	7.71143e-08	-0.347222
NM_181844	chr17	7026950	7027087	exons_8	0.0147059	0.956522	204	92	1.89523e-67	2.93316e-65	0.941816
NM_001369566	chr17	7206271	7208271	promoters	0.00934579	0.769231	107	26	2.1016e-18	7.68996e-17	0.759885
NM_001321074	chr17	7208174	7208239	exons_1	0.00934579	0.769231	107	26	2.1016e-18	7.68996e-17	0.759885
NM_001363642	chr17	7352162	7354943	exons_1	0.423423	0.106383	111	94	1.67486e-07	2.11073e-06	-0.31704
NM_175734	chr17	7426188	7427567	exons_3	0.0933333	1	75	50	3.41786e-29	2.05709e-27	0.906667
NM_172089	chr17	7556903	7559623	introns_1	0.982759	0.777778	58	36	0.000865014	0.00460501	-0.204981
NM_003808	chr17	7557291	7559291	promoters	0.982759	0.777778	58	36	0.000865014	0.00460501	-0.204981
NM_003808	chr17	7558292	7559297	exons_1	0.982759	0.777778	58	36	0.000865014	0.00460501	-0.204981
NM_001198624	chr17	7558376	7559067	introns_1	0.982759	0.777778	58	36	0.000865014	0.00460501	-0.204981
NM_020877	chr17	7740550	7740809	introns_2	0.963636	0	55	94	2.43761e-40	2.15576e-38	-0.963636
NM_025014	chr17	8311991	8312640	exons_2	0.0291262	0.956522	103	46	8.8578e-33	5.91833e-31	0.927396
NM_025014	chr17	8315066	8315277	exons_6	0.95122	0	82	32	8.73317e-26	4.64758e-24	-0.95122
NM_001372	chr17	11689566	11690436	exons_20	0.343931	0.976923	346	260	2.69195e-68	4.29778e-66	0.632992
NM_030665	chr17	17792933	17798513	exons_1	0.279661	1	118	54	3.15641e-23	1.45733e-21	0.720339
NM_007148	chr17	19410231	19412231	promoters	0.0166667	1	60	36	1.89326e-27	1.08976e-25	0.983333
NM_007148	chr17	19411232	19411462	exons_1	0.0166667	1	60	36	1.89326e-27	1.08976e-25	0.983333
NM_015077	chr17	28388277	28388349	introns_6	0.0652174	1	46	26	4.96821e-18	1.77929e-16	0.934783
NM_001098635	chr17	28959025	28959221	exons_7	0.596154	1	52	42	5.01701e-08	6.93647e-07	0.403846
NM_152345	chr17	29612116	29612273	exons_11	0.466667	0.1	30	60	0.000114464	0.000770907	-0.366667
NR_038847	chr17	38924167	38926167	promoters	0.0252525	1	198	72	5.20286e-62	7.23961e-60	0.974747
NR_038847	chr17	38925168	38925891	exons_1	0.0252525	1	198	72	5.20286e-62	7.23961e-60	0.974747
NM_015083	chr17	39460485	39462485	promoters	0	0.28125	131	128	5.00541e-14	1.3249e-12	0.28125
NM_001282433	chr17	40931456	40937127	introns_7	0.83871	0.0869565	93	46	6.80994e-19	2.53464e-17	-0.751753
NM_015515	chr17	40936208	40936953	exons_1	0.83871	0.0869565	93	46	6.80994e-19	2.53464e-17	-0.751753
NM_001282433	chr17	40936270	40938270	promoters	0.83871	0.0869565	93	46	6.80994e-19	2.53464e-17	-0.751753
NM_015515	chr17	40936646	40938646	promoters	0.83871	0.0869565	93	46	6.80994e-19	2.53464e-17	-0.751753
NM_006455	chr17	41810863	41811034	exons_6	0.493827	0	81	174	1.4075e-25	7.39952e-24	-0.493827
NM_003632	chr17	42684036	42684229	exons_3	0.323529	0	136	180	5.36558e-20	2.15575e-18	-0.323529
NM_001661	chr17	43399661	43401137	exons_2	0.983607	0.525424	122	118	1.54529e-19	5.98658e-18	-0.458183
NM_001986	chr17	43544899	43546899	promoters	0	0.208333	158	48	2.73739e-08	3.94658e-07	0.208333
NM_001079675	chr17	43545274	43545367	exons_2	0	0.333333	79	24	4.00107e-07	4.71151e-06	0.333333
NM_001079675	chr17	43545340	43547340	promoters	0	0.208333	158	48	2.73739e-08	3.94658e-07	0.208333
NM_004160	chr17	43966533	44004390	introns_6	0.984615	0	65	42	5.88694e-31	3.75946e-29	-0.984615
NM_002390	chr17	44779240	44779738	introns_19	0.292683	1	41	58	5.44284e-17	1.81432e-15	0.707317
NR_135646	chr17	45168805	45170330	exons_1	0.853333	0	75	42	3.04644e-23	1.41517e-21	-0.853333
NM_001303444	chr17	45169015	45170040	exons_1	0.853333	0	75	42	3.04644e-23	1.41517e-21	-0.853333
NM_030753	chr17	46773910	46818517	introns_4	0.521277	1	94	24	2.33542e-07	2.86233e-06	0.478723
NM_001159387	chr17	49169523	49176838	exons_10	0.0886076	1	79	38	1.96674e-25	1.02507e-23	0.911392
NM_001159388	chr17	49169523	49169989	exons_1	0.0886076	1	79	38	1.96674e-25	1.02507e-23	0.911392
NM_001135186	chr17	49209226	49211226	promoters	0.21875	1	128	116	1.72735e-44	1.62725e-42	0.78125
NM_001198754	chr17	49209574	49211574	promoters	0.21875	1	128	116	1.72735e-44	1.62725e-42	0.78125
NM_016428	chr17	49209706	49211706	promoters	0.21875	1	128	116	1.72735e-44	1.62725e-42	0.78125
NM_001135186	chr17	49210227	49210841	exons_1	0.21875	1	128	116	1.72735e-44	1.62725e-42	0.78125
NM_001198754	chr17	49210444	49210574	exons_1	0.27907	1	43	44	2.79872e-15	8.11629e-14	0.72093
NM_016428	chr17	49210707	49210841	exons_1	0.190476	1	42	28	6.94828e-14	1.80299e-12	0.809524
NM_001256330	chr17	50626017	50627471	exons_3	0.0526316	1	95	36	1.00669e-28	5.95262e-27	0.947368
NM_001256334	chr17	50626320	50627471	exons_2	0.0526316	1	95	36	1.00669e-28	5.95262e-27	0.947368
NM_032559	chr17	53822927	53825193	exons_1	0.0134228	0.506849	149	146	2.11171e-26	1.15417e-24	0.493426
NM_001305545	chr17	58357468	58358823	exons_1	0.139535	0.986667	344	150	3.19595e-81	6.82718e-79	0.847132
NM_000442	chr17	64377824	64378117	exons_14	0.336735	1	98	34	2.98129e-14	7.98186e-13	0.663265
NM_018714	chr17	73196507	73196751	exons_2	0.015873	1	63	46	4.95782e-32	3.26227e-30	0.984127
NM_001005731	chr17	75736565	75736694	exons_14	0.0966387	1	238	108	6.37008e-69	1.0559e-66	0.903361
NM_001113492	chr17	77402704	77482143	introns_1	0.577197	0.362903	421	248	7.43265e-08	9.93663e-07	-0.214294
NM_001293696	chr17	77405141	77482143	introns_1	0.577197	0.362903	421	248	7.43265e-08	9.93663e-07	-0.214294
NM_001113496	chr17	77449748	77451748	promoters	0.2287	0.025	223	160	7.27026e-10	1.34473e-08	-0.2037
NM_001293697	chr17	77450483	77452483	promoters	0.2287	0.025	223	160	7.27026e-10	1.34473e-08	-0.2037
NM_001113496	chr17	77450787	77482143	introns_1	0.577197	0.362903	421	248	7.43265e-08	9.93663e-07	-0.214294
NM_001145526	chr17	78202499	78202603	exons_1	0.019544	1	307	122	7.06484e-103	2.56707e-100	0.980456
NR_073178	chr17	78266234	78269769	introns_3	0.028777	1	139	42	1.26885e-38	1.06324e-36	0.971223
NM_198594	chr17	79047538	79049788	exons_2	0.935135	0.180952	185	210	4.04058e-58	5.21562e-56	-0.754183
NM_001350451	chr17	79103255	79104072	introns_5	0.016129	1	62	28	3.5287e-24	1.72367e-22	0.983871
NM_003655	chr17	79833156	79835395	exons_1	0.479233	0	313	176	9.31624e-39	7.82822e-37	-0.479233
NM_003655	chr17	79837837	79837902	exons_3	0.706667	0	75	48	1.40276e-18	5.16401e-17	-0.706667
NM_019020	chr17	79948872	79949006	exons_3	0.941176	0.0517241	68	116	3.69557e-38	3.06288e-36	-0.889452
NM_001243342	chr17	80089764	80089884	exons_7	0.967742	0.35	155	160	1.4271e-35	1.04062e-33	-0.617742
NM_001080395	chr17	81120201	81122823	exons_4	0.43696	0.030303	579	330	1.0382e-47	1.07118e-45	-0.406657
NR_037688	chr17	81511903	81512142	exons_5	0.472222	0.1875	108	32	0.00276977	0.0124232	-0.284722
NM_001145113	chr17	81941844	81942295	introns_1	0.00458716	1	218	68	6.35352e-68	9.93442e-66	0.995413
NR_135466	chr17	83005115	83005210	exons_6	0.984127	0.6	126	30	7.95835e-09	1.26062e-07	-0.384127
NM_001105581	chr18	7230103	7232103	promoters	0.982857	0.0555556	175	180	1.42728e-85	3.40907e-83	-0.927302
NM_001105581	chr18	7231104	7232088	exons_1	0.982857	0.0555556	175	180	1.42728e-85	3.40907e-83	-0.927302
NM_001378206	chr18	8783530	8784843	exons_4	0.0272189	0.467337	845	398	2.55466e-81	5.49597e-79	0.440118
NM_001198940	chr18	34858399	34863965	introns_3	0.966942	0.23913	121	92	4.948e-32	3.26227e-30	-0.727812
NM_015559	chr18	44701833	44869229	introns_1	0.952381	0.0983607	63	122	2.44495e-33	1.65179e-31	-0.85402
NM_001318841	chr18	48039900	48041123	exons_2	0.261905	0.967742	126	62	4.13906e-23	1.90812e-21	0.705837
NM_001318841	chr18	48185996	48338173	introns_1	0.183007	0.944444	153	72	3.1374e-30	1.94224e-28	0.761438
NM_001371288	chr18	48185996	48193693	introns_1	0.183007	0.944444	153	72	3.1374e-30	1.94224e-28	0.761438
NM_001371290	chr18	48185996	48252160	introns_1	0.183007	0.944444	153	72	3.1374e-30	1.94224e-28	0.761438
NM_001371286	chr18	48185996	48408357	introns_1	0.132075	0.507463	212	134	3.51302e-14	9.33134e-13	0.375387
NM_001371285	chr18	48185996	48409225	introns_1	0.101449	0.336634	276	202	2.25933e-10	4.46188e-09	0.235184
NM_001190823	chr18	48921911	48942480	introns_1	0.423077	1	52	36	8.77756e-11	1.81252e-09	0.576923
NM_014593	chr18	50286640	50286739	introns_6	1	0.0625	55	32	6.50642e-23	2.95901e-21	-0.9375
NM_014593	chr18	50286740	50286858	exons_7	0.618182	0.0625	55	32	4.54543e-08	6.31903e-07	-0.555682
NM_001243236	chr18	55279657	55302415	introns_1	0.63388	0.973684	183	76	1.27034e-10	2.56726e-09	0.339804
NM_001348214	chr18	55279657	55321669	introns_1	0.63388	0.973684	183	76	1.27034e-10	2.56726e-09	0.339804
NM_001348215	chr18	55279657	55320830	introns_1	0.63388	0.973684	183	76	1.27034e-10	2.56726e-09	0.339804
NM_001044369	chr18	74446606	74447283	exons_3	0.0989011	0.411765	91	68	3.25711e-06	3.21723e-05	0.312864
NR_028339	chr18	80148255	80162515	introns_1	0.972727	0	110	104	1.74865e-60	2.36801e-58	-0.972727
NR_028340	chr18	80148255	80175879	introns_1	0.972727	0	110	104	1.74865e-60	2.36801e-58	-0.972727
NM_032510	chr18	80157234	80160606	exons_1	0.972727	0	110	104	1.74865e-60	2.36801e-58	-0.972727
NM_033513	chr19	518889	519654	exons_2	0.22576	0.0173611	691	576	2.17787e-33	1.47463e-31	-0.208399
NM_002819	chr19	806557	807868	introns_2	0.949541	0.0185185	218	108	2.99224e-71	5.50101e-69	-0.931023
NM_019112	chr19	1062172	1062313	exons_42	0.381166	0.0192308	223	416	1.59309e-35	1.1561e-33	-0.361935
NM_014963	chr19	1109292	1109423	exons_4	0.934426	0	61	42	3.42677e-26	1.8529e-24	-0.934426
NM_001351273	chr19	1465155	1473244	exons_10	0.411111	0.0547945	180	146	3.60754e-15	1.03825e-13	-0.356317
NM_203304	chr19	1554669	1556923	exons_1	0.977679	0.0232558	224	172	2.46585e-101	8.49989e-99	-0.954423
NM_001174118	chr19	1555577	1556923	exons_2	0.977679	0.0232558	224	172	2.46585e-101	8.49989e-99	-0.954423
NM_001281454	chr19	1584540	1584677	exons_5	0.629213	0	356	272	7.7495e-78	1.54653e-75	-0.629213
NM_001351779	chr19	1609292	1611849	exons_1	0.459259	1	135	80	3.46199e-21	1.4667e-19	0.540741
NM_001351778	chr19	1609600	1611703	introns_1	0.343284	1	67	40	1.78641e-14	4.8513e-13	0.656716
NM_001136139	chr19	1611370	1611703	introns_1	0.343284	1	67	40	1.78641e-14	4.8513e-13	0.656716
NM_001351778	chr19	1611704	1611849	exons_1	0.573529	1	68	40	9.84134e-09	1.53721e-07	0.426471
NM_001351778	chr19	1611850	1615284	introns_1	0.776224	0.976562	572	256	1.6256e-16	5.23472e-15	0.200339
NM_001351779	chr19	1612207	1612433	exons_1	0.776224	0.976562	572	256	1.6256e-16	5.23472e-15	0.200339
NM_001351778	chr19	1650288	1652299	introns_13	0.916667	0	36	40	6.74789e-20	2.6933e-18	-0.916667
NM_001319	chr19	1941419	1969507	introns_1	0.662162	0	74	24	1.37606e-10	2.768e-09	-0.662162
NM_001319	chr19	1979163	1979248	exons_6	0.947761	0.0465116	134	172	2.84076e-67	4.33023e-65	-0.90125
NM_001319	chr19	1979249	1979318	introns_6	0.955882	0.0465116	68	86	1.48921e-35	1.0833e-33	-0.909371
NM_015675	chr19	2477029	2477251	exons_3	0.49	0.114286	100	140	7.97225e-11	1.65751e-09	-0.375714
NM_052847	chr19	2555189	2646223	introns_3	0.952381	0	63	36	1.95333e-25	1.02159e-23	-0.952381
NM_001245005	chr19	3381712	3382243	exons_1	0.858824	0.037037	170	108	8.23465e-48	8.52526e-46	-0.821786
NM_001245005	chr19	3434401	3435082	introns_4	0.909091	0.03125	110	64	9.49071e-35	6.77391e-33	-0.877841
NM_001145165	chr19	3496541	3496886	exons_4	0.459091	1	220	116	7.84606e-31	4.97913e-29	0.540909
NM_015897	chr19	4037616	4039386	exons_11	0.110519	0.70122	751	328	4.43949e-84	9.97538e-82	0.5907
NM_001317990	chr19	4053971	4055247	exons_2	0.958333	0	144	216	2.19409e-95	6.72278e-93	-0.958333
NM_052972	chr19	4536402	4538951	exons_1	0	1	72	48	5.2595e-37	4.04928e-35	1
NM_018708	chr19	4791734	4801273	exons_1	0.317125	0.0307692	473	260	6.43189e-24	3.11172e-22	-0.286356
NM_130855	chr19	5286235	5340663	introns_4	0.121495	0.521127	214	142	1.74545e-16	5.59688e-15	0.399631
NM_181710	chr19	5454416	5456416	promoters	0.0446927	1	179	112	1.53763e-73	2.95206e-71	0.955307
NM_181710	chr19	5455417	5456856	exons_1	0.0446927	1	179	112	1.53763e-73	2.95206e-71	0.955307
NM_001161619	chr19	5788399	5790259	introns_10	0.976654	0.0290698	257	344	6.91149e-149	6.98844e-146	-0.947584
NM_020175	chr19	5789207	5789719	exons_1	0.976654	0.0290698	257	344	6.91149e-149	6.98844e-146	-0.947584
NM_004558	chr19	5805452	5823767	introns_1	0.0884956	1	113	34	3.87235e-26	2.079e-24	0.911504
NM_001290331	chr19	6475274	6475399	exons_10	0.327273	0	110	64	5.98849e-10	1.12899e-08	-0.327273
NM_006087	chr19	6494319	6496221	exons_1	0.290988	0.767544	921	456	7.56217e-65	1.11898e-62	0.476556
NM_001166113	chr19	7541522	7541684	exons_9	0.957447	0.037037	47	54	7.83308e-25	3.98672e-23	-0.92041
NM_001166113	chr19	7554555	7554723	exons_2	0.382353	0.148936	68	94	0.000695816	0.00381404	-0.233417
NM_001166113	chr19	7556570	7556654	introns_7	0.773585	0.347826	53	46	1.43575e-05	0.000123657	-0.425759
NM_001166113	chr19	7556725	7557167	introns_8	0.905556	0.491979	540	374	4.62643e-45	4.46937e-43	-0.413577
NM_001282352	chr19	8586252	8586343	introns_5	0.989691	0.26087	97	46	1.70787e-22	7.6411e-21	-0.728821
NM_001282352	chr19	8586344	8586470	exons_6	1	0.0434783	97	46	1.08826e-36	8.29432e-35	-0.956522
NM_015719	chr19	9970975	9971028	exons_15	1	0.371429	82	140	1.73081e-26	9.49409e-25	-0.628571
NM_004230	chr19	10224948	10231203	introns_1	0.815789	0	76	78	3.31095e-31	2.11887e-29	-0.815789
NM_001281504	chr19	10542903	10544903	promoters	0.0042735	0.210526	234	114	1.90596e-12	4.45762e-11	0.206253
NM_001281504	chr19	10544957	10545130	exons_1	0.952381	0	147	144	2.20462e-77	4.34253e-75	-0.952381
NM_004945	chr19	10717052	10719052	promoters	0	0.266667	111	30	2.43668e-07	2.97203e-06	0.266667
NM_001190716	chr19	10717078	10719078	promoters	0	0.266667	111	30	2.43668e-07	2.97203e-06	0.266667
NR_030368	chr19	10717403	10719403	promoters	0	0.266667	111	30	2.43668e-07	2.97203e-06	0.266667
NM_001190716	chr19	10718404	10759737	introns_1	0	0.266667	111	30	2.43668e-07	2.97203e-06	0.266667
NM_145045	chr19	11426446	11426571	exons_8	0.96124	0	129	56	1.01702e-43	9.40557e-42	-0.96124
NM_000528	chr19	12649913	12650014	exons_7	1	0.606061	65	66	8.91534e-11	1.83846e-09	-0.393939
NM_004461	chr19	12933550	12933711	exons_1	0	0.315789	82	76	2.78929e-10	5.46579e-09	0.315789
NM_001378404	chr19	13022971	13024971	promoters	0.0646552	0.923077	232	52	6.11997e-37	4.68796e-35	0.858422
NM_001378404	chr19	13023972	13024034	exons_1	0.0646552	0.923077	232	52	6.11997e-37	4.68796e-35	0.858422
NM_001365983	chr19	13081856	13090298	introns_1	0.269316	0.971223	453	278	5.52329e-91	1.48268e-88	0.701907
NM_001378405	chr19	13081856	13087988	introns_1	0.313725	0.978022	255	182	3.31863e-53	3.84226e-51	0.664296
NM_001378405	chr19	13087989	13088136	exons_1	0.212121	0.958333	198	96	2.76552e-38	2.29834e-36	0.746212
NM_001367834	chr19	13799720	13799921	exons_2	1	0	104	42	5.37193e-40	4.64251e-38	-1
NM_002918	chr19	13963276	13963537	introns_3	0.974684	0	237	114	7.0469e-88	1.79631e-85	-0.974684
NM_001367327	chr19	14056638	14058638	promoters	0.0674603	0.30303	252	132	1.86142e-09	3.25255e-08	0.23557
NM_001367327	chr19	14056662	14056804	exons_4	0.0674603	0.30303	252	132	1.86142e-09	3.25255e-08	0.23557
NM_001145028	chr19	14061076	14063076	promoters	0.0285714	1	35	52	3.74478e-25	1.92206e-23	0.971429
NM_002730	chr19	14107410	14117501	introns_1	0.878788	0	66	28	2.36069e-18	8.61723e-17	-0.878788
NM_207518	chr19	14107410	14114133	introns_1	0.878788	0	66	28	2.36069e-18	8.61723e-17	-0.878788
NR_045214	chr19	14137224	14155151	introns_1	0.764192	0.986301	229	146	2.10604e-11	4.58283e-10	0.222109
NM_014921	chr19	14147743	14151615	exons_1	0.764192	0.986301	229	146	2.10604e-11	4.58283e-10	0.222109
NM_001130065	chr19	17175663	17175741	exons_13	0.981818	0.78125	55	64	0.00032525	0.00194177	-0.200568
NM_001288757	chr19	17268756	17269091	exons_1	0.518657	0.863636	268	132	1.71758e-12	4.02635e-11	0.34498
NM_001288756	chr19	17268794	17269091	exons_1	0.518657	0.863636	268	132	1.71758e-12	4.02635e-11	0.34498
NM_031310	chr19	17365286	17365998	exons_4	0.0043573	0.98913	459	184	4.68355e-159	5.91962e-156	0.984773
NR_147835	chr19	17491198	17511342	introns_1	0.931507	0.375	73	32	1.55518e-09	2.74752e-08	-0.556507
NM_198580	chr19	17500405	17500494	introns_2	0.931507	0.375	73	32	1.55518e-09	2.74752e-08	-0.556507
NM_012088	chr19	17520944	17521288	exons_5	0.0366972	0.333333	109	216	2.8791e-11	6.21156e-10	0.296636
NM_018174	chr19	17725829	17728172	exons_4	0.883495	0.377049	206	122	4.17296e-22	1.85062e-20	-0.506446
NM_001384407	chr19	17776272	17781230	introns_1	0.967742	0	155	80	3.13497e-59	4.09897e-57	-0.967742
NR_169258	chr19	17776687	17781230	introns_1	0.967742	0	155	80	3.13497e-59	4.09897e-57	-0.967742
NM_001384392	chr19	17778229	17778725	introns_1	0.967742	0	155	80	3.13497e-59	4.09897e-57	-0.967742
NR_169226	chr19	17778229	17781230	introns_1	0.967742	0	155	80	3.13497e-59	4.09897e-57	-0.967742
NR_169219	chr19	17778609	17778884	exons_1	0.967742	0	155	80	3.13497e-59	4.09897e-57	-0.967742
NM_015683	chr19	18007169	18009169	promoters	0.0196078	0.526316	102	114	1.69612e-19	6.5292e-18	0.506708
NM_015683	chr19	18008971	18009118	exons_3	0.0196078	0.526316	102	114	1.69612e-19	6.5292e-18	0.506708
NM_005027	chr19	18162202	18162310	exons_3	1	0	34	36	6.99091e-23	3.17458e-21	-1
NM_005027	chr19	18162408	18162506	exons_4	0.961207	0.651163	232	172	4.03726e-17	1.35923e-15	-0.310044
NM_005027	chr19	18169087	18170532	exons_2	0.813031	0	353	232	2.34164e-104	9.10658e-102	-0.813031
NM_000095	chr19	18785965	18786146	exons_7	0.949367	0	158	60	5.39242e-47	5.45245e-45	-0.949367
NM_001321544	chr19	19105561	19105727	exons_4	0.966102	0.142857	59	28	5.29102e-16	1.63606e-14	-0.823245
NM_001190328	chr19	19535034	19535144	exons_2	0.0128205	0.96	78	50	6.32749e-33	4.23705e-31	0.947179
NM_153221	chr19	19541091	19541246	exons_4	0.203883	0	309	186	8.24509e-16	2.48615e-14	-0.203883
NM_001376111	chr19	30549515	30710756	introns_1	0.390977	1	133	84	1.85987e-25	9.74393e-24	0.609023
NM_001352260	chr19	30643577	30710756	introns_1	0.0121951	1	82	36	2.02396e-31	1.30074e-29	0.987805
NM_001080436	chr19	34500129	34512304	exons_8	0.62585	0.0769231	147	52	3.24972e-13	7.95616e-12	-0.548927
NR_024562	chr19	35059059	35059778	exons_1	0.00549451	0.4375	182	64	8.75513e-19	3.25065e-17	0.432005
NM_001375441	chr19	35059673	35059802	exons_1	0.00549451	0.4375	182	64	8.75513e-19	3.25065e-17	0.432005
NM_001185101	chr19	35336342	35340880	introns_1	0.0196078	1	102	44	3.63667e-37	2.82858e-35	0.980392
NM_001185100	chr19	35337755	35338021	exons_1	0.0196078	1	102	44	3.63667e-37	2.82858e-35	0.980392
NR_046420	chr19	35672291	35674291	promoters	0.99115	0.0795455	113	176	2.59394e-64	3.74689e-62	-0.911605
NM_001281443	chr19	35673438	35673545	exons_1	0.99115	0.0795455	113	176	2.59394e-64	3.74689e-62	-0.911605
NM_001316902	chr19	35716298	35716477	introns_3	0.324324	0	111	64	7.07863e-10	1.31249e-08	-0.324324
NM_001040425	chr19	35744012	35744145	exons_1	0.78481	0.474684	395	316	5.62105e-18	2.00835e-16	-0.310127
NM_144987	chr19	35744070	35744145	exons_1	0.747508	0.402985	301	268	4.27079e-17	1.43625e-15	-0.344523
NM_001378293	chr19	35811845	35813845	promoters	0.12963	0.962963	162	108	2.20789e-48	2.33359e-46	0.833333
NM_001378293	chr19	35812360	35812556	exons_5	0.12963	0.962963	162	108	2.20789e-48	2.33359e-46	0.833333
NM_001291088	chr19	37892578	37895456	exons_3	0.0492958	0.978723	142	188	3.92421e-79	8.04304e-77	0.929428
NM_015073	chr19	38081256	38083099	exons_3	0.973684	0	190	92	7.33084e-71	1.31582e-68	-0.973684
NM_001135156	chr19	38219059	38222356	introns_4	0.0215054	0.428571	93	28	6.7159e-08	9.05423e-07	0.407066
NM_001042723	chr19	38473377	38473771	exons_28	0.691406	0.117647	256	68	1.75815e-18	6.45664e-17	-0.573759
NM_001042723	chr19	38584943	38585099	exons_32	0.342105	1	76	46	2.11676e-16	6.68853e-15	0.657895
NM_001001414	chr19	39200616	39201884	exons_6	0.00589971	1	339	90	1.17078e-93	3.51627e-91	0.9941
NM_020956	chr19	40393764	40398816	exons_1	0.493724	0.936508	239	126	7.09376e-20	2.82391e-18	0.442784
NM_181882	chr19	40393768	40397970	exons_1	0.493724	0.936508	239	126	7.09376e-20	2.82391e-18	0.442784
NM_000713	chr19	40451364	40451492	exons_2	0.546875	0.931818	192	88	4.97375e-12	1.13184e-10	0.384943
NM_020971	chr19	40523437	40523639	exons_17	0.0152672	0.588235	131	34	2.27012e-15	6.60227e-14	0.572968
NM_030622	chr19	41206280	41207539	exons_9	0.229508	1	61	40	8.59635e-18	3.03211e-16	0.770492
NM_198540	chr19	41425359	41426810	exons_1	0.0319829	0.92623	469	244	1.39137e-143	1.24134e-140	0.894247
NM_001365103	chr19	41912933	41928039	introns_5	0.127273	0.362069	275	116	2.69836e-07	3.24809e-06	0.234796
NM_152296	chr19	41981908	41982106	exons_15	0.047619	0.983607	168	122	4.18417e-70	7.21152e-68	0.935988
NM_152296	chr19	41988318	41988377	exons_21	0.1875	0.896552	80	58	3.84522e-18	1.38858e-16	0.709052
NM_152296	chr19	41988378	41988475	introns_21	0.204545	1	88	40	1.00572e-20	4.19057e-19	0.795455
NM_001256214	chr19	41988476	41988601	exons_1	0.146789	1	327	104	2.56899e-64	3.74652e-62	0.853211
NM_152296	chr19	41988476	41988562	exons_1	0.146789	1	327	104	2.56899e-64	3.74652e-62	0.853211
NM_001256213	chr19	41988563	41993392	introns_1	0.151934	1	362	150	8.05929e-85	1.85205e-82	0.848066
NM_152296	chr19	41988563	41994070	introns_1	0.151934	1	362	150	8.05929e-85	1.85205e-82	0.848066
NM_001256214	chr19	41988602	41994070	introns_1	0.151934	1	362	150	8.05929e-85	1.85205e-82	0.848066
NM_001308402	chr19	42250566	42253841	introns_1	0.615385	0.0434783	26	46	4.60567e-08	6.39984e-07	-0.571906
NM_198850	chr19	43479377	43479593	exons_3	0.0606061	0.9	99	40	2.46228e-23	1.15264e-21	0.839394
NM_020219	chr19	44676271	44676421	exons_3	0.466667	0.692308	90	52	0.00856224	0.0327112	0.225641
NM_005581	chr19	44812549	44813249	introns_4	0.0833333	0.861111	36	72	3.44426e-16	1.07488e-14	0.777778
NM_001382422	chr19	45212370	45213357	exons_1	0.283951	1	81	30	4.36537e-14	1.15751e-12	0.716049
NM_001382422	chr19	45238523	45239061	exons_11	0.00569801	0.979167	351	192	4.24882e-141	3.30471e-138	0.973469
NM_006663	chr19	45391880	45392340	exons_6	0.295082	1	61	26	8.76801e-12	1.95998e-10	0.704918
NM_001080469	chr19	45710629	45713573	exons_1	0.970588	0.342857	68	70	5.17916e-17	1.73214e-15	-0.627731
NM_016457	chr19	46678396	46678663	exons_1	0.0423729	0.96875	118	64	4.1723e-41	3.73341e-39	0.926377
NM_016457	chr19	46689537	46689698	exons_3	0.00699301	1	143	72	2.82614e-59	3.77657e-57	0.993007
NM_001736	chr19	47319781	47322065	exons_2	0	1	80	28	1.02405e-28	6.0435e-27	1
NM_001364171	chr19	48318387	48318576	exons_12	0.0314961	0.9375	254	96	5.15437e-67	7.77873e-65	0.906004
NM_144577	chr19	48318499	48320499	promoters	0.0314961	0.9375	254	96	5.15437e-67	7.77873e-65	0.906004
NM_000836	chr19	48392667	48394667	promoters	0.385965	0.916667	114	72	2.31894e-14	6.23607e-13	0.530702
NM_000836	chr19	48393869	48394657	introns_1	0.385965	0.916667	114	72	2.31894e-14	6.23607e-13	0.530702
NM_177973	chr19	48551171	48553171	promoters	0.0333333	1	90	42	5.6289e-33	3.79438e-31	0.966667
NM_004605	chr19	48574735	48576735	promoters	0.461538	0.0208333	182	96	1.13593e-17	3.94249e-16	-0.440705
NM_004605	chr19	48575736	48576083	exons_1	0.461538	0.0208333	182	96	1.13593e-17	3.94249e-16	-0.440705
NM_177973	chr19	48575941	48576083	exons_1	0.461538	0.0208333	182	96	1.13593e-17	3.94249e-16	-0.440705
NR_004401	chr19	48638147	48663196	introns_1	0.95	0.0333333	60	60	5.18581e-29	3.09658e-27	-0.916667
NM_001217	chr19	48640095	48640280	exons_5	0.95	0.0333333	60	60	5.18581e-29	3.09658e-27	-0.916667
NM_017805	chr19	48739610	48741610	promoters	0.206897	0	203	194	5.44592e-15	1.54969e-13	-0.206897
NM_019113	chr19	48754523	48756523	promoters	0.413043	1	46	36	1.14955e-10	2.33872e-09	0.586957
NM_019113	chr19	48755891	48756471	exons_2	0.413043	1	46	36	1.14955e-10	2.33872e-09	0.586957
NM_001161354	chr19	48854007	48854087	exons_6	0.434783	1	46	34	7.41504e-10	1.36984e-08	0.565217
NM_003089	chr19	49107795	49108604	exons_1	0.973418	0.00598802	790	334	9.55926e-259	2.89971e-255	-0.96743
NM_001301069	chr19	49107822	49108604	exons_1	0.973418	0.00598802	790	334	9.55926e-259	2.89971e-255	-0.96743
NM_001321285	chr19	49158260	49168552	introns_1	0.305882	1	85	36	2.0808e-15	6.08083e-14	0.694118
NM_001321281	chr19	49166216	49168552	introns_1	0.305882	1	85	36	2.0808e-15	6.08083e-14	0.694118
NM_001195227	chr19	49168260	49168423	exons_2	0.305882	1	85	36	2.0808e-15	6.08083e-14	0.694118
NM_001195227	chr19	49182578	49182922	exons_3	1	0.0384615	42	52	2.18626e-26	1.19063e-24	-0.961538
NM_001321282	chr19	49182578	49182867	exons_1	1	0.0384615	42	52	2.18626e-26	1.19063e-24	-0.961538
NM_015953	chr19	49555468	49555822	exons_1	0.5	0	96	80	1.18886e-17	4.12147e-16	-0.5
NM_021228	chr19	49650868	49653705	exons_7	0.871595	0.0245902	257	244	3.22757e-97	1.06419e-94	-0.847005
NM_198318	chr19	49680589	49681909	introns_1	0.98	0.714286	100	56	5.83606e-07	6.65781e-06	-0.265714
NR_049811	chr19	49681116	49683116	promoters	0.98	0.714286	100	56	5.83606e-07	6.65781e-06	-0.265714
NM_007254	chr19	49862044	49862105	exons_5	0.727273	0.105263	33	38	2.59718e-08	3.75694e-07	-0.62201
NM_001077186	chr19	50309005	50309177	exons_25	0	0.833333	98	24	9.65852e-21	4.03001e-19	0.833333
NM_004977	chr19	50316092	50320222	introns_1	0.966443	0.0238095	149	168	1.64265e-79	3.38967e-77	-0.942633
NR_110912	chr19	50316092	50320592	introns_1	0.966443	0.0238095	149	168	1.64265e-79	3.38967e-77	-0.942633
NR_002798	chr19	50334829	50334973	exons_3	1	0.294118	68	34	5.61715e-17	1.87037e-15	-0.705882
NM_007121	chr19	50378522	50378796	exons_2	0.767857	1	56	86	3.00405e-07	3.59183e-06	0.232143
NM_004533	chr19	50459111	50459306	exons_23	0.965116	0.0169492	86	118	3.97657e-52	4.5178e-50	-0.948167
NM_001080457	chr19	50516893	50519415	exons_1	0.226994	0.00892857	326	224	6.78381e-17	2.24161e-15	-0.218065
NM_016148	chr19	50659255	50662682	exons_1	0.0274348	0.953846	729	260	2.57756e-192	3.90938e-189	0.926411
NR_108100	chr19	51688502	51692633	introns_1	0.00470588	0.494624	425	186	1.96983e-54	2.34325e-52	0.489918
NM_001316994	chr19	51689583	51694477	introns_1	0.00525762	0.954802	951	354	5.76321e-287	2.49744e-283	0.949545
NR_029843	chr19	51691611	51693611	promoters	0.00525762	0.954802	951	354	5.76321e-287	2.49744e-283	0.949545
NR_029482	chr19	51691785	51693785	promoters	0.00525762	0.954802	951	354	5.76321e-287	2.49744e-283	0.949545
NR_029693	chr19	51692253	51694253	promoters	0.00525762	0.954802	951	354	5.76321e-287	2.49744e-283	0.949545
NM_001316972	chr19	51692329	51694329	promoters	0.00525762	0.954802	951	354	5.76321e-287	2.49744e-283	0.949545
NR_108100	chr19	51692456	51694456	promoters	0.00525762	0.954802	951	354	5.76321e-287	2.49744e-283	0.949545
NR_029843	chr19	51692612	51692681	exons_1	0.011396	0.939394	351	132	7.70367e-101	2.62565e-98	0.927998
NR_108100	chr19	51692634	51693456	exons_1	0.00572246	0.962121	699	264	3.3222e-216	5.59864e-213	0.956399
NR_029482	chr19	51692786	51692864	exons_1	0	1	118	24	6.69112e-30	4.10867e-28	1
NM_002739	chr19	53906317	53906457	exons_17	0.0406091	0.5	197	48	5.83536e-14	1.52595e-12	0.459391
NM_133168	chr19	54096862	54097164	exons_3	0.0333333	0.4375	60	32	1.17525e-06	1.28146e-05	0.404167
NM_001126133	chr19	55134157	55137102	introns_1	0.0232558	1	43	26	8.77066e-20	3.4687e-18	0.976744
NM_003283	chr19	55134205	55137102	introns_1	0.0232558	1	43	26	8.77066e-20	3.4687e-18	0.976744
NM_001126133	chr19	55137103	55137212	exons_1	0.0925926	1	54	48	2.78776e-25	1.4505e-23	0.907407
NM_033113	chr19	55481201	55484487	exons_3	0.485149	0.142857	101	28	0.000587218	0.00328626	-0.342291
NM_001012478	chr19	55673934	55674716	exons_2	0.522222	0.04	90	100	2.21743e-15	6.45524e-14	-0.482222
NM_198426	chr19	58554045	58554236	exons_5	0.233871	0	124	88	4.65771e-09	7.61928e-08	-0.233871
NM_018968	chr2	949848	951848	promoters	0.206522	0	92	78	4.7792e-07	5.53641e-06	-0.206522
NR_136151	chr2	949911	950386	exons_2	0.206522	0	92	78	4.7792e-07	5.53641e-06	-0.206522
NM_012293	chr2	1648172	1649675	exons_7	0.982196	0.580357	337	224	6.95151e-37	5.31151e-35	-0.401839
NM_018436	chr2	3702363	3702670	exons_12	0.982609	0.125	115	96	7.99786e-44	7.41918e-42	-0.857609
NM_001177716	chr2	10043888	10046149	introns_1	0	0.25	59	40	8.51793e-06	7.73139e-05	0.25
NM_004850	chr2	11343996	11344636	exons_1	0	0.25	150	48	1.48491e-09	2.63411e-08	0.25
NM_014668	chr2	11592776	11593126	exons_1	0.973684	0.0176991	152	226	5.28529e-96	1.72391e-93	-0.955985
NM_001293231	chr2	15940744	15945492	introns_1	0.217129	0.00398406	829	502	1.57714e-38	1.31793e-36	-0.213145
NR_161163	chr2	15941433	15943433	promoters	0.371608	0	479	264	2.28916e-42	2.08526e-40	-0.371608
NM_001293233	chr2	15941948	15942854	exons_1	0.271768	0	379	238	2.06024e-26	1.12807e-24	-0.271768
NM_001293233	chr2	15942855	15945492	introns_1	0.75	0	100	26	3.20153e-14	8.54887e-13	-0.75
NM_145260	chr2	19351485	19352410	exons_1	0	0.285714	53	56	1.00355e-06	1.10017e-05	0.285714
NM_001029883	chr2	29070594	29074523	exons_2	0	1	69	30	3.03786e-28	1.77554e-26	1
NM_004304	chr2	29192774	29193922	exons_1	0	0.272727	118	88	1.82291e-11	4.00407e-10	0.272727
NM_014600	chr2	31249371	31249468	exons_3	0.976471	0.764706	85	34	0.000382697	0.00224888	-0.211765
NR_144521	chr2	39213473	39225838	introns_4	0.0416667	1	120	92	1.74229e-56	2.17493e-54	0.958333
NM_012205	chr2	42791583	42793583	promoters	0.886364	0.136364	44	44	8.26793e-14	2.13446e-12	-0.75
NM_012205	chr2	42792457	42792583	exons_10	0.886364	0.136364	44	44	8.26793e-14	2.13446e-12	-0.75
NM_024766	chr2	44706342	44707398	introns_5	0.935897	0.2375	78	160	4.08869e-27	2.30962e-25	-0.698397
NM_001330082	chr2	50538253	50538636	exons_3	0.015	1	200	166	4.13534e-105	1.62911e-102	0.985
NM_002398	chr2	66443049	66464108	introns_3	0.47205	0.0784314	161	102	1.06654e-12	2.5177e-11	-0.393618
NM_152792	chr2	69960091	69962265	exons_1	0.598039	0.833333	102	60	0.00133246	0.00669738	0.235294
NM_152792	chr2	69961265	69963265	promoters	0.598039	0.833333	102	60	0.00133246	0.00669738	0.235294
NM_004097	chr2	72924494	72933786	introns_2	0.148515	0.371429	101	70	0.000839257	0.00450266	0.222914
NM_001015055	chr2	74430465	74430518	exons_8	0.235955	1	89	66	6.81129e-27	3.79108e-25	0.764045
NM_001320634	chr2	127064019	127068923	introns_1	0.206897	1	29	94	4.02618e-21	1.70098e-19	0.793103
NM_001320640	chr2	127064019	127068162	introns_1	0.206897	1	29	94	4.02618e-21	1.70098e-19	0.793103
NM_001321234	chr2	132643286	132646280	exons_1	0.773196	0	97	52	3.9265e-24	1.90876e-22	-0.773196
NM_001508	chr2	132645101	132646582	exons_1	0.773196	0	97	52	3.9265e-24	1.90876e-22	-0.773196
NM_006186	chr2	156326921	156327850	introns_3	0.472727	0.942308	55	104	1.41653e-11	3.1273e-10	0.46958
NM_004288	chr2	157414619	157416143	exons_1	0.010101	0.873563	297	174	9.0894e-96	2.93317e-93	0.863462
NM_002897	chr2	160367392	160493288	introns_6	0.0271493	0.818182	221	176	3.61035e-68	5.67443e-66	0.791032
NM_001038493	chr2	172088003	172089673	exons_1	0.247573	0	206	128	1.27077e-13	3.2284e-12	-0.247573
NM_001316306	chr2	172427471	172465538	introns_1	0.268293	0.0416667	82	48	0.000438432	0.00253805	-0.226626
NM_001365529	chr2	172427971	172465538	introns_1	0.268293	0.0416667	82	48	0.000438432	0.00253805	-0.226626
NM_001375986	chr2	190408858	190409059	exons_1	0	0.454545	32	44	2.06641e-07	2.57422e-06	0.454545
NM_144629	chr2	197568225	197572280	exons_1	0.122449	1	49	32	3.56823e-18	1.29009e-16	0.877551
NM_001042599	chr2	211375717	211384060	exons_1	0.0397351	1	151	84	5.35023e-59	6.9654e-57	0.960265
NM_007127	chr2	218425615	218425811	exons_4	0.0571429	0.944444	280	180	1.5883e-93	4.58853e-91	0.887302
NM_025216	chr2	218889984	218890363	exons_3	0	0.981982	341	222	9.30502e-157	1.08561e-153	0.981982
NM_001173408	chr2	219568055	219568324	exons_8	0.0393939	0.924731	330	186	4.95866e-103	1.8802e-100	0.885337
NM_001304537	chr2	221563731	221564394	exons_14	0.00732601	0.662698	273	504	7.01282e-88	1.79631e-85	0.655372
NM_181461	chr2	222232284	222294166	introns_3	0.901345	0.0243902	223	82	3.89e-51	4.37035e-49	-0.876955
NM_001142644	chr2	228016406	228020156	exons_3	0	0.621622	59	74	1.07669e-17	3.74974e-16	0.621622
NM_139072	chr2	229366873	229367119	exons_2	0.335443	1	158	80	4.99071e-29	2.99186e-27	0.664557
NM_001037131	chr2	235930924	235968461	introns_1	0.973333	0.615385	75	26	5.81156e-06	5.45783e-05	-0.357949
NR_161305	chr20	2205927	2207927	promoters	0	0.411765	62	34	6.4643e-09	1.03422e-07	0.411765
NR_161305	chr20	2206928	2207519	exons_1	0	0.411765	62	34	6.4643e-09	1.03422e-07	0.411765
NM_198994	chr20	2417232	2417573	exons_10	0.503937	0.75	127	72	0.000553792	0.00312186	0.246063
NR_147212	chr20	21088031	21093737	introns_1	0.348039	0.555556	204	72	0.00216802	0.0100815	0.207516
NR_001558	chr20	22560554	22565116	exons_1	0.638095	1	210	96	1.5125e-16	4.88089e-15	0.361905
NR_131907	chr20	31720506	31722506	promoters	0.322034	0	59	46	5.31808e-07	6.1013e-06	-0.322034
NM_138578	chr20	31721655	31722348	exons_1	0.322034	0	59	46	5.31808e-07	6.1013e-06	-0.322034
NR_134257	chr20	31721655	31722330	exons_1	0.322034	0	59	46	5.31808e-07	6.1013e-06	-0.322034
NM_001191	chr20	31721844	31722348	exons_1	0.322034	0	59	46	5.31808e-07	6.1013e-06	-0.322034
NM_004118	chr20	31844303	31845604	exons_1	0.0396825	0.96	126	100	4.62089e-53	5.28944e-51	0.920317
NM_004118	chr20	31844604	31846604	promoters	0.0396825	0.96	126	100	4.62089e-53	5.28944e-51	0.920317
NM_020884	chr20	34987557	34987675	exons_16	0.0526316	1	266	72	1.76796e-61	2.43769e-59	0.947368
NR_119376	chr20	35600563	35600924	exons_29	0.914729	0.0555556	258	144	5.38568e-73	1.00845e-70	-0.859173
NM_199181	chr20	36777832	36794374	introns_1	0.103976	0.961538	327	156	4.57298e-83	1.01253e-80	0.857563
NM_080627	chr20	36793249	36794599	exons_1	0.103976	0.961538	327	156	4.57298e-83	1.01253e-80	0.857563
NM_006698	chr20	37517417	37519350	exons_1	0.97191	0.0882353	178	68	7.87443e-46	7.68048e-44	-0.883675
NM_001317075	chr20	37519303	37521303	promoters	0.97191	0.0882353	178	68	7.87443e-46	7.68048e-44	-0.883675
NM_001301860	chr20	41345796	41345995	exons_2	1	0.769231	35	26	0.000850236	0.00454789	-0.230769
NM_001287182	chr20	44354698	44356698	promoters	0.945652	0	92	116	5.49592e-55	6.56351e-53	-0.945652
NM_001287183	chr20	44354800	44356800	promoters	0.945652	0	92	116	5.49592e-55	6.56351e-53	-0.945652
NM_006809	chr20	44956486	44960206	introns_6	0	0.210526	110	38	1.5139e-06	1.60065e-05	0.210526
NR_106870	chr20	45424509	45426509	promoters	0.0656934	0.987179	274	312	7.07159e-139	5.23194e-136	0.921486
NM_001184728	chr20	45425574	45426241	exons_1	0.0656934	0.987179	274	312	7.07159e-139	5.23194e-136	0.921486
NM_021248	chr20	46216994	46227507	introns_8	0.979592	0	49	32	1.74402e-23	8.21477e-22	-0.979592
NM_001281776	chr20	47236517	47246007	introns_1	0.959866	0	299	176	8.39192e-119	4.24268e-116	-0.959866
NM_001363741	chr20	47238758	47239138	exons_1	0.959866	0	299	176	8.39192e-119	4.24268e-116	-0.959866
NM_001281779	chr20	47238896	47239138	exons_1	0.959866	0	299	176	8.39192e-119	4.24268e-116	-0.959866
NM_005985	chr20	49983824	49984351	exons_2	0.037037	0.294118	81	34	0.00015632	0.00101931	0.257081
NR_034124	chr20	50312431	50313299	introns_2	0.982456	0.117647	57	34	1.32747e-19	5.16251e-18	-0.864809
NR_109950	chr20	50312914	50314356	exons_1	0.982456	0.117647	57	34	1.32747e-19	5.16251e-18	-0.864809
NM_002237	chr20	51003656	51004806	exons_1	0.300813	0.0833333	246	96	5.10296e-06	4.86312e-05	-0.21748
NM_173485	chr20	52973334	53253498	introns_1	0.934426	0.56	61	50	1.87156e-06	1.95361e-05	-0.374426
NM_001193421	chr20	53185677	53253498	introns_1	0.934426	0.56	61	50	1.87156e-06	1.95361e-05	-0.374426
NM_001193421	chr20	53253499	53256571	exons_2	0.526882	1	186	88	1.26789e-20	5.26132e-19	0.473118
NM_001316361	chr20	54028392	54028972	exons_3	0.0234375	0.76	256	200	1.23622e-69	2.0833e-67	0.736563
NM_199171	chr20	57648392	57652598	exons_1	0.888889	0.105263	81	38	9.50735e-18	3.34566e-16	-0.783626
NM_199169	chr20	57648396	57652598	exons_1	0.888889	0.105263	81	38	9.50735e-18	3.34566e-16	-0.783626
NM_030773	chr20	59023705	59026654	exons_4	0.0277778	0.982143	216	224	6.08958e-114	2.93208e-111	0.954365
NM_001199505	chr20	59577618	59743106	introns_1	0.0151515	0.24	66	50	6.61468e-05	0.000473565	0.224848
NM_080672	chr20	59605133	59743106	introns_1	0.0151515	0.24	66	50	6.61468e-05	0.000473565	0.224848
NM_012384	chr20	63587605	63590729	exons_1	0.973684	0.571429	190	84	5.02784e-17	1.68338e-15	-0.402256
NM_001204175	chr21	18256509	18256818	exons_1	0.744	0.5	125	40	0.0047208	0.0196273	-0.244
NR_109961	chr21	33114624	33123611	introns_2	0.324074	0.875	108	64	2.48853e-13	6.13716e-12	0.550926
NM_001256295	chr21	38822674	38824954	exons_10	0.96	0.03125	75	64	2.69917e-34	1.9041e-32	-0.92875
NM_207627	chr21	42290050	42290218	exons_2	0.970588	0.769231	170	52	1.50666e-05	0.000128668	-0.201357
NM_022719	chr22	19142895	19144505	introns_2	0	0.612903	120	62	2.31372e-24	1.15435e-22	0.612903
NM_022719	chr22	19143651	19145651	promoters	0	0.218391	394	174	9.91704e-23	4.46989e-21	0.218391
NM_032608	chr22	25741187	25743187	promoters	0.932203	0	59	86	2.23057e-37	1.77126e-35	-0.932203
NM_032608	chr22	25742294	25760983	introns_1	0.932203	0	59	86	2.23057e-37	1.77126e-35	-0.932203
NM_032608	chr22	25955179	25955364	exons_23	0.977612	0.416667	134	144	3.48017e-28	2.02236e-26	-0.560945
NM_001184776	chr22	26292406	26293146	exons_1	0.037037	1	54	38	1.7407e-25	9.13538e-24	0.962963
NM_020437	chr22	26433392	26434501	exons_2	0.888476	0.368421	269	76	2.70511e-19	1.02188e-17	-0.520055
NM_032173	chr22	29049197	29050948	exons_6	0.968354	0.0133333	316	150	6.8266e-108	2.91659e-105	-0.955021
NM_032045	chr22	29094421	29098861	introns_2	0.965517	0	87	40	1.56371e-31	1.00922e-29	-0.965517
NM_006478	chr22	29308059	29308738	exons_1	0.447489	0.176471	438	136	3.21107e-09	5.41437e-08	-0.271018
NM_001278730	chr22	29308087	29308738	exons_1	0.447489	0.176471	438	136	3.21107e-09	5.41437e-08	-0.271018
NM_032052	chr22	31342961	31344331	introns_1	0.827692	0.240741	325	108	7.96295e-29	4.74554e-27	-0.586952
NM_152243	chr22	37560589	37566071	introns_1	0.205607	0	107	90	6.62116e-08	8.95037e-07	-0.205607
NM_001039141	chr22	37723185	37726503	exons_7	0.0512821	0.982143	195	112	8.42059e-70	1.44311e-67	0.930861
NM_001301130	chr22	37986313	38041067	introns_1	0.830508	0.136364	59	44	2.50576e-13	6.17463e-12	-0.694145
NM_025045	chr22	38086242	38086449	exons_3	0.0967742	1	93	38	3.80686e-26	2.04747e-24	0.903226
NM_001289912	chr22	38336707	38361398	introns_1	0.0294118	0.803571	34	112	1.04011e-17	3.62651e-16	0.77416
NR_002821	chr22	38344742	38361398	introns_1	0.0294118	0.803571	34	112	1.04011e-17	3.62651e-16	0.77416
NM_005297	chr22	40678483	40680483	promoters	0.00248139	0.953125	403	128	1.9316e-113	9.01434e-111	0.950644
NM_005297	chr22	40679484	40679734	exons_1	0.00248139	0.953125	403	128	1.9316e-113	9.01434e-111	0.950644
NM_052839	chr22	50178934	50180295	exons_1	0.85	0.115385	40	52	1.23043e-13	3.13909e-12	-0.734615
NR_027691	chr22	50179136	50179220	introns_1	0.85	0.115385	40	52	1.23043e-13	3.13909e-12	-0.734615
NR_135275	chr22	50194900	50195040	exons_4	0.974359	0.714286	39	28	0.00151275	0.00747601	-0.260073
NM_138433	chr22	50545899	50551023	exons_1	0.943548	0.0120482	124	166	6.0158e-71	1.0993e-68	-0.9315
NM_001085425	chr22	50627053	50627165	introns_6	0.0588235	0.733333	34	30	3.90133e-09	6.44218e-08	0.67451
NM_001085425	chr22	50627152	50629152	promoters	0.0294118	0.666667	68	60	2.02306e-16	6.4192e-15	0.637255
NM_001085425	chr22	50627166	50627406	exons_7	0	0.6	34	30	2.33983e-09	4.02588e-08	0.6
NM_001372044	chr22	50705097	50706071	introns_18	0.404762	1	126	60	2.54191e-19	9.65036e-18	0.595238
NM_001372044	chr22	50722438	50730720	introns_23	0.047619	0.95	126	120	3.20427e-55	3.93516e-53	0.902381
NM_001033117	chr3	9248646	9250646	promoters	0	0.219048	329	420	3.77444e-27	2.13608e-25	0.219048
NR_146969	chr3	9248755	9250755	promoters	0	0.219048	329	420	3.77444e-27	2.13608e-25	0.219048
NM_001033117	chr3	9248885	9249646	exons_1	0	0.219048	329	420	3.77444e-27	2.13608e-25	0.219048
NM_198560	chr3	9505967	9506203	exons_2	0.107843	1	102	64	2.05282e-36	1.56066e-34	0.892157
NM_017897	chr3	25790990	25791997	exons_1	0.226415	0.745763	159	236	3.03757e-25	1.57238e-23	0.519348
NM_001145391	chr3	25791697	25791945	introns_1	0.226415	0.745763	159	236	3.03757e-25	1.57238e-23	0.519348
NR_026937	chr3	25791770	25791997	exons_1	0.226415	0.745763	159	236	3.03757e-25	1.57238e-23	0.519348
NM_001174060	chr3	31748121	31876432	introns_1	0.150877	0.973333	285	150	7.02907e-71	1.26917e-68	0.822456
NM_017784	chr3	31830040	31830231	exons_1	0.150877	0.973333	285	150	7.02907e-71	1.26917e-68	0.822456
NM_015551	chr3	33150043	33154033	exons_1	0.046875	1	64	68	3.07344e-36	2.32493e-34	0.953125
NM_001304288	chr3	39405719	39407719	promoters	0	0.541667	122	96	4.2034e-25	2.15382e-23	0.541667
NM_001304288	chr3	39406765	39407620	introns_1	0	0.44	74	50	5.97877e-12	1.35647e-10	0.44
NM_001174138	chr3	42262947	42264947	promoters	0.822086	0.0217391	326	92	1.65886e-49	1.77182e-47	-0.800347
NM_000729	chr3	42264697	42264907	exons_1	0.822086	0.0217391	326	92	1.65886e-49	1.77182e-47	-0.800347
NM_032806	chr3	43079234	43081536	exons_1	0.0169492	1	59	62	4.19198e-36	3.12431e-34	0.983051
NR_125406	chr3	46406059	46408059	promoters	0.180952	1	105	88	5.61576e-38	4.60401e-36	0.819048
NM_003965	chr3	46406258	46408258	promoters	0.180952	1	105	88	5.61576e-38	4.60401e-36	0.819048
NM_001130910	chr3	46406614	46408614	promoters	0.180952	1	105	88	5.61576e-38	4.60401e-36	0.819048
NM_003965	chr3	46407259	46407502	exons_1	0.180952	1	105	88	5.61576e-38	4.60401e-36	0.819048
NM_024512	chr3	46521659	46527425	introns_2	0.0169492	1	118	40	2.89918e-37	2.26659e-35	0.983051
NM_004345	chr3	48224675	48225292	introns_3	0.0200803	1	249	210	2.39041e-129	1.57632e-126	0.97992
NM_003458	chr3	49651543	49658196	exons_5	0.335849	0.948718	530	390	1.49034e-90	3.96561e-88	0.612869
NM_022064	chr3	49716478	49720510	introns_8	0.545455	0	231	138	1.10267e-35	8.05987e-34	-0.545455
NM_198722	chr3	49716829	49719684	exons_1	0.545455	0	231	138	1.10267e-35	8.05987e-34	-0.545455
NM_198722	chr3	49718684	49720684	promoters	0.545455	0	231	138	1.10267e-35	8.05987e-34	-0.545455
NM_033158	chr3	50319569	50320535	exons_2	0.981481	0.181818	54	132	2.61399e-27	1.49892e-25	-0.799663
NR_132749	chr3	56173521	56296018	introns_10	0.876289	0.673913	97	92	0.000714596	0.00390217	-0.202376
NM_017563	chr3	57120314	57165160	introns_1	0.970588	0.708333	68	48	3.58219e-05	0.000278122	-0.262255
NM_015123	chr3	69198775	69216262	introns_12	0.00641026	0.309524	156	84	3.72525e-13	9.07645e-12	0.303114
NM_199512	chr3	112638028	112639916	exons_7	0	0.5	104	168	2.76727e-24	1.3627e-22	0.5
NM_001009899	chr3	113677398	113696369	introns_6	0	0.222222	88	36	4.16582e-06	4.04242e-05	0.222222
NM_001009899	chr3	113695642	113697642	promoters	0	0.222222	88	36	4.16582e-06	4.04242e-05	0.222222
NM_002093	chr3	120093347	120094447	exons_1	0	0.301075	230	186	8.67325e-24	4.16289e-22	0.301075
NM_001199800	chr3	122005244	122005393	exons_1	0	0.25	136	128	9.00387e-13	2.13211e-11	0.25
NM_001199800	chr3	122005394	122006990	introns_1	0	0.378378	64	74	1.48406e-10	2.97735e-09	0.378378
NM_001308326	chr3	122382231	122384231	promoters	0	0.36	45	50	2.14773e-07	2.66459e-06	0.36
NM_001256348	chr3	122911920	122912069	exons_2	0.816901	0.0140845	71	142	1.08964e-37	8.8377e-36	-0.802817
NR_046079	chr3	122911920	122912066	exons_1	0.816901	0.0140845	71	142	1.08964e-37	8.8377e-36	-0.802817
NM_001366336	chr3	123949133	123961143	introns_1	0.0119048	0.453488	84	172	1.20647e-16	3.90577e-15	0.441584
NM_001308317	chr3	123956428	123961143	introns_1	0.0119048	0.453488	84	172	1.20647e-16	3.90577e-15	0.441584
NM_001366339	chr3	123956796	123961143	introns_1	0.0119048	0.453488	84	172	1.20647e-16	3.90577e-15	0.441584
NM_001322988	chr3	124268743	124269255	exons_4	0.0736842	0.478261	95	46	5.20676e-08	7.18827e-07	0.404577
NM_025112	chr3	126474891	126476891	promoters	0.0041841	0.254902	239	102	9.48979e-15	2.65556e-13	0.250718
NM_001040653	chr3	126474919	126476919	promoters	0.0041841	0.254902	239	102	9.48979e-15	2.65556e-13	0.250718
NM_001040653	chr3	126474959	126475919	exons_5	0.0041841	0.254902	239	102	9.48979e-15	2.65556e-13	0.250718
NM_025112	chr3	126474959	126475891	exons_1	0.0041841	0.254902	239	102	9.48979e-15	2.65556e-13	0.250718
NM_001102608	chr3	130570818	130571393	exons_6	0.516484	0.96	91	50	2.92917e-09	4.96665e-08	0.443516
NM_001199182	chr3	130850929	130930415	introns_1	0	0.37037	135	54	5.74454e-14	1.50349e-12	0.37037
NM_001001485	chr3	130893014	130895014	promoters	0	0.37037	135	54	5.74454e-14	1.50349e-12	0.37037
NM_001378514	chr3	130893083	130895083	promoters	0	0.37037	135	54	5.74454e-14	1.50349e-12	0.37037
NM_014382	chr3	130893549	130895549	promoters	0	0.37037	135	54	5.74454e-14	1.50349e-12	0.37037
NM_001001485	chr3	130894015	130894337	exons_1	0	0.37037	135	54	5.74454e-14	1.50349e-12	0.37037
NM_001378514	chr3	130894084	130894337	exons_1	0	0.37037	135	54	5.74454e-14	1.50349e-12	0.37037
NR_135277	chr3	133445576	133455328	introns_1	0.673469	1	49	36	6.56793e-06	6.08899e-05	0.326531
NR_135278	chr3	133445576	133448780	introns_1	0.673469	1	49	36	6.56793e-06	6.08899e-05	0.326531
NM_003571	chr3	133447317	133447399	exons_1	0.673469	1	49	36	6.56793e-06	6.08899e-05	0.326531
NM_016201	chr3	134370700	134371494	exons_1	0.588235	0.928571	204	84	6.72617e-10	1.25481e-08	0.340336
NM_002628	chr3	149968358	149968550	exons_1	0.971591	0.01875	176	320	9.82261e-120	5.3207e-117	-0.952841
NM_198407	chr3	172443291	172445465	exons_1	0.178218	0.5	101	40	0.00016312	0.00105841	0.321782
NM_004423	chr3	184170319	184173614	exons_15	0.483516	0.0294118	91	68	6.45277e-12	1.46292e-10	-0.454105
NM_001080745	chr3	186211886	186242503	introns_5	0.0393701	0.961538	127	52	4.70285e-37	3.62993e-35	0.922168
NM_001080745	chr3	186267778	186272254	introns_1	0.0277778	0.971429	216	140	2.62614e-86	6.58359e-84	0.943651
NM_001080744	chr3	186268801	186268917	exons_1	0.0277778	0.971429	216	140	2.62614e-86	6.58359e-84	0.943651
NM_001364880	chr3	190604128	190604413	exons_2	0.972656	0.318182	256	132	6.05917e-47	6.10627e-45	-0.654474
NR_033944	chr3	193959962	194003584	introns_2	0.0274262	0.350318	474	314	5.79927e-36	4.3011e-34	0.322892
NM_130830	chr3	194361047	194369660	introns_1	0	1	39	36	2.18003e-24	1.08944e-22	1
NM_001135057	chr3	194363413	194369660	introns_1	0	1	39	36	2.18003e-24	1.08944e-22	1
NM_001135057	chr3	194368743	194370743	promoters	0	1	39	36	2.18003e-24	1.08944e-22	1
NM_001382273	chr3	195888607	195908484	introns_1	0.411616	0.0504202	396	238	6.30359e-27	3.51494e-25	-0.361196
NR_145450	chr3	195907075	195909075	promoters	0.411616	0.0504202	396	238	6.30359e-27	3.51494e-25	-0.361196
NM_005929	chr3	197022957	197023113	exons_2	0.135593	1	118	50	1.96517e-30	1.23164e-28	0.864407
NM_001323029	chr3	197912675	197912749	exons_3	0.972222	0	72	76	1.8831e-42	1.72054e-40	-0.972222
NR_125892	chr4	4762068	4764240	introns_1	0.0135135	0.816456	666	632	3.63085e-231	6.47872e-228	0.802942
NM_004334	chr4	15718907	15718993	exons_7	0.480769	1	104	120	2.71815e-24	1.34069e-22	0.519231
NM_145290	chr4	22387376	22388947	exons_1	0.955556	0.68	90	50	1.05014e-05	9.37187e-05	-0.275556
NM_001253912	chr4	38014509	38014973	exons_1	0.616667	0.09375	120	64	4.63717e-13	1.12531e-11	-0.522917
NM_016531	chr4	38688585	38689071	exons_3	0.547619	0.945946	168	74	2.35946e-11	5.10862e-10	0.398327
NM_001024924	chr4	55852647	55854647	promoters	0	0.313433	164	134	3.2607e-18	1.18031e-16	0.313433
NM_178237	chr4	55852649	55854649	promoters	0	0.313433	164	134	3.2607e-18	1.18031e-16	0.313433
NM_001024924	chr4	55853648	55853953	exons_1	0	0.313433	164	134	3.2607e-18	1.18031e-16	0.313433
NM_178237	chr4	55853650	55853797	exons_1	0	0.56	121	50	5.26019e-20	2.11622e-18	0.56
NM_001371342	chr4	62070109	62078335	exons_1	0.0104167	0.796296	96	108	2.98587e-36	2.26433e-34	0.78588
NM_001354435	chr4	99649231	99654679	exons_2	0.949593	0.03207	615	686	4.21412e-297	1.27831e-292	-0.917524
NM_005908	chr4	102759968	102761968	promoters	0.00689655	0.21875	145	64	8.28805e-08	1.10219e-06	0.211853
NM_005908	chr4	102760718	102760968	exons_17	0.00689655	0.21875	145	64	8.28805e-08	1.10219e-06	0.211853
NM_181892	chr4	102809856	102826484	introns_1	0.409836	0	61	118	3.11952e-15	9.00356e-14	-0.409836
NM_001300795	chr4	102824860	102826860	promoters	0.409836	0	61	118	3.11952e-15	9.00356e-14	-0.409836
NM_001300795	chr4	102825318	102825737	introns_1	0.409836	0	61	118	3.11952e-15	9.00356e-14	-0.409836
NM_022569	chr4	115112620	115114620	promoters	0.0166667	0.227273	60	44	0.000332164	0.00197954	0.210606
NM_019050	chr4	119211626	119213626	promoters	0	0.3	86	40	3.54642e-08	5.01994e-07	0.3
NR_125931	chr4	119211644	119213644	promoters	0	0.3	86	40	3.54642e-08	5.01994e-07	0.3
NM_001371395	chr4	119211712	119213712	promoters	0	0.3	86	40	3.54642e-08	5.01994e-07	0.3
NM_019050	chr4	119212627	119212873	exons_1	0	0.3	86	40	3.54642e-08	5.01994e-07	0.3
NM_001371395	chr4	119212713	119212873	exons_1	0	0.3	86	40	3.54642e-08	5.01994e-07	0.3
NM_001154	chr4	121686373	121696580	introns_11	0	0.217391	64	46	1.41411e-05	0.000122384	0.217391
NM_001154	chr4	121695980	121697980	promoters	0	0.217391	64	46	1.41411e-05	0.000122384	0.217391
NM_001306199	chr4	139496522	139517884	introns_1	0.370968	1	186	116	3.26243e-36	2.44957e-34	0.629032
NM_030648	chr4	139506038	139511843	exons_1	0.370968	1	186	116	3.26243e-36	2.44957e-34	0.629032
NM_015130	chr4	140620782	140622917	exons_1	0.990385	0	104	30	6.4173e-31	4.08955e-29	-0.990385
NR_104027	chr4	143513472	143514225	exons_1	0.00854701	0.416667	234	120	1.3283e-25	7.03186e-24	0.40812
NM_003601	chr4	143513702	143514101	exons_1	0.00854701	0.416667	234	120	1.3283e-25	7.03186e-24	0.40812
NM_001306215	chr4	145757627	145761598	exons_1	0.947917	0.0963855	192	166	4.82983e-69	8.0499e-67	-0.851531
NM_001306215	chr4	145902166	145903215	exons_12	0.166667	0.945455	168	110	1.64929e-42	1.51146e-40	0.778788
NM_001371116	chr4	152974675	152979671	exons_1	0.311828	1	93	40	1.10878e-16	3.60103e-15	0.688172
NM_033393	chr4	152974675	152979696	exons_1	0.311828	1	93	40	1.10878e-16	3.60103e-15	0.688172
NM_000508	chr4	154583126	154584833	exons_1	0.0374332	0.75	187	80	9.79722e-35	6.97626e-33	0.712567
NM_001375470	chr4	155213892	155217076	exons_1	0.0681818	1	44	48	1.53596e-24	7.71388e-23	0.931818
NM_001873	chr4	165378007	165380007	promoters	0.00423729	0.296296	236	216	7.55178e-23	3.42415e-21	0.292059
NM_001873	chr4	165379008	165379528	exons_1	0.00666667	0.380952	150	168	1.19881e-20	4.9883e-19	0.374286
NM_001204353	chr4	167233426	167235426	promoters	0.002457	0.211538	407	208	4.48444e-22	1.97719e-20	0.209081
NM_001040159	chr4	167233494	167235494	promoters	0.002457	0.211538	407	208	4.48444e-22	1.97719e-20	0.209081
NM_001251967	chr4	167233590	167235590	promoters	0.002457	0.211538	407	208	4.48444e-22	1.97719e-20	0.209081
NM_001204358	chr4	167233985	167234173	exons_1	0.002457	0.211538	407	208	4.48444e-22	1.97719e-20	0.209081
NR_132761	chr4	184001478	184017088	introns_1	0.382979	0.615385	141	52	0.00396374	0.0169442	0.232406
NM_020225	chr4	184009158	184011423	exons_1	0.382979	0.615385	141	52	0.00396374	0.0169442	0.232406
NM_001145670	chr4	185630599	185646667	introns_1	0.267016	0.0526316	191	76	1.62238e-05	0.000136819	-0.214384
NM_001145672	chr4	185635412	185646667	introns_1	0.267016	0.0526316	191	76	1.62238e-05	0.000136819	-0.214384
NM_003603	chr4	185638163	185646667	introns_2	0.267016	0.0526316	191	76	1.62238e-05	0.000136819	-0.214384
NM_001145673	chr4	185638877	185639035	exons_1	0.267016	0.0526316	191	76	1.62238e-05	0.000136819	-0.214384
NR_134296	chr5	891522	893522	promoters	0	0.210526	80	38	1.06497e-05	9.48022e-05	0.210526
NM_001009877	chr5	891550	893550	promoters	0	0.210526	80	38	1.06497e-05	9.48022e-05	0.210526
NM_001375863	chr5	891801	893801	promoters	0	0.210526	80	38	1.06497e-05	9.48022e-05	0.210526
NM_004237	chr5	891883	893883	promoters	0	0.210526	80	38	1.06497e-05	9.48022e-05	0.210526
NM_016358	chr5	1881925	1883925	promoters	0	0.240741	74	108	4.1781e-08	5.85668e-07	0.240741
NM_001278635	chr5	1882748	1886861	introns_1	0	0.240741	74	108	4.1781e-08	5.85668e-07	0.240741
NR_033898	chr5	3422623	3531752	introns_3	0.230769	0.977273	104	88	3.00275e-30	1.87033e-28	0.746503
NM_007118	chr5	14461019	14461311	exons_35	0.675676	0	74	102	3.15567e-27	1.80611e-25	-0.675676
NM_000958	chr5	40691779	40693735	exons_3	0.0298507	1	67	42	6.6167e-30	4.07122e-28	0.970149
NM_198449	chr5	50440288	50442288	promoters	0.015873	0.421053	63	76	5.09853e-10	9.73922e-09	0.40518
NM_001178056	chr5	50667187	50668070	introns_1	0	0.366667	123	60	8.90531e-14	2.2854e-12	0.366667
NM_001331028	chr5	50667602	50668070	introns_1	0	0.366667	123	60	8.90531e-14	2.2854e-12	0.366667
NM_001290228	chr5	66899983	66986443	introns_1	0.962121	0.726667	396	300	1.02703e-19	4.01468e-18	-0.235455
NM_198828	chr5	66917019	66986443	introns_1	0.962121	0.726667	396	300	1.02703e-19	4.01468e-18	-0.235455
NM_001290226	chr5	66958072	66960072	promoters	0.962121	0.726667	396	300	1.02703e-19	4.01468e-18	-0.235455
NM_001290226	chr5	66959073	66959294	exons_1	0.962121	0.726667	396	300	1.02703e-19	4.01468e-18	-0.235455
NM_001290226	chr5	67163147	67169591	exons_6	0.510288	0.153226	243	248	9.88508e-18	3.47455e-16	-0.357062
NM_001038603	chr5	69419371	69420531	exons_2	0.25	0.951456	400	206	2.3072e-69	3.86666e-67	0.701456
NM_004472	chr5	73447777	73449777	promoters	0.003367	0.277778	594	180	1.0819e-32	7.19704e-31	0.274411
NM_001297716	chr5	76083513	76131649	introns_1	0.00806452	0.235294	124	34	6.54752e-06	6.08037e-05	0.22723
NM_001297716	chr5	76209888	76285161	introns_4	0.04	1	75	36	1.20222e-27	6.94629e-26	0.96
NM_005779	chr5	78510399	78564812	introns_2	0.015625	0.230769	64	26	0.00101348	0.005273	0.215144
NM_006909	chr5	81086954	81092800	introns_9	0.979592	0	49	50	1.52697e-29	9.33856e-28	-0.979592
NM_001385621	chr5	124701270	124748532	introns_1	0	0.230769	103	26	6.14493e-06	5.73892e-05	0.230769
NM_001385620	chr5	124744084	124745172	exons_1	0	0.230769	103	26	6.14493e-06	5.73892e-05	0.230769
NM_006930	chr5	134174023	134176854	introns_4	0	0.352941	47	34	1.06471e-06	1.1647e-05	0.352941
NR_105049	chr5	135039596	135040047	exons_1	0.00892857	0.25	112	56	2.39249e-07	2.92991e-06	0.241071
NR_105050	chr5	135039601	135040047	exons_1	0.00892857	0.25	112	56	2.39249e-07	2.92991e-06	0.241071
NM_032412	chr5	140175286	140194445	introns_1	0	0.266667	109	30	2.7524e-07	3.30135e-06	0.266667
NM_020690	chr5	140542282	140548905	introns_1	0.584615	0	130	54	1.29169e-17	4.46266e-16	-0.584615
NM_003732	chr5	140546661	140548661	promoters	0.584615	0	130	54	1.29169e-17	4.46266e-16	-0.584615
NM_003732	chr5	140547662	140547840	exons_1	0.584615	0	130	54	1.29169e-17	4.46266e-16	-0.584615
NM_001303145	chr5	141149056	141151056	promoters	0.783784	0	37	62	2.13763e-19	8.13588e-18	-0.783784
NM_018939	chr5	141150057	141153287	exons_1	0.783784	0	37	62	2.13763e-19	8.13588e-18	-0.783784
NM_001303145	chr5	141150495	141153287	exons_1	0.783784	0	37	62	2.13763e-19	8.13588e-18	-0.783784
NM_032420	chr5	141853090	141854436	exons_1	0.010989	0.246479	182	284	3.49635e-15	1.0072e-13	0.23549
NM_152550	chr5	145937823	145938306	exons_2	0.920792	0.0526316	101	76	6.65653e-36	4.92486e-34	-0.868161
NM_001243253	chr5	149999928	150000654	exons_1	0	0.243902	78	164	3.6927e-09	6.13777e-08	0.243902
NM_030953	chr5	150000474	150000654	exons_1	0	0.243902	78	164	3.6927e-09	6.13777e-08	0.243902
NM_001122853	chr5	150671755	150671908	exons_5	0.651515	0	66	38	8.42037e-14	2.16644e-12	-0.651515
NM_001122853	chr5	150672340	150672502	exons_6	0.969231	0	65	40	1.10056e-28	6.48239e-27	-0.969231
NM_015465	chr5	154911727	154911898	exons_13	0.972973	0.75	222	160	1.27467e-11	2.82851e-10	-0.222973
NM_001366657	chr5	160670668	160686078	introns_5	0.779874	1	159	98	1.20909e-09	2.17795e-08	0.220126
NM_001366658	chr5	160684391	160686391	promoters	0.779874	1	159	98	1.20909e-09	2.17795e-08	0.220126
NM_001366658	chr5	160684835	160685391	exons_1	0.779874	1	159	98	1.20909e-09	2.17795e-08	0.220126
NM_203352	chr5	177491421	177492404	introns_1	0.97137	0.0764331	489	314	3.38722e-169	4.89275e-166	-0.894937
NM_213636	chr5	177491807	177491925	exons_1	0.973039	0.084507	408	284	9.8566e-146	9.34344e-143	-0.888532
NM_213636	chr5	177491926	177492404	introns_1	0.962963	0	81	30	1.30169e-25	6.91515e-24	-0.962963
NM_015111	chr5	178121474	178126081	exons_5	0.906667	0.307692	150	104	2.32436e-24	1.15775e-22	-0.598974
NM_000843	chr5	178986838	178986983	exons_4	0.121053	0.833333	190	96	7.58733e-34	5.20711e-32	0.712281
NR_031598	chr5	179797346	179799346	promoters	0.26875	1	320	116	7.3382e-52	8.30585e-50	0.73125
NM_054013	chr5	179798347	179798434	exons_1	0.258621	1	232	80	1.50566e-37	1.20827e-35	0.741379
NM_054013	chr5	179798513	179798591	exons_2	0.295455	1	88	36	7.21045e-16	2.1916e-14	0.704545
NM_002020	chr5	180621008	180621105	introns_16	0.0333333	0.3125	90	64	9.4264e-07	1.0413e-05	0.279167
NM_002020	chr5	180621106	180621252	exons_16	0.015625	0.216667	128	120	7.94518e-08	1.05845e-06	0.201042
NM_001278711	chr6	5999205	6002352	introns_1	0	0.5625	40	32	1.11298e-09	2.01921e-08	0.5625
NM_001357857	chr6	16326394	16328470	exons_2	0.038961	1	77	28	5.35912e-24	2.60102e-22	0.961039
NM_198586	chr6	18120440	18122677	exons_1	0	0.375	42	32	1.41574e-06	1.51429e-05	0.375
NM_198586	chr6	18121677	18123677	promoters	0	0.375	42	32	1.41574e-06	1.51429e-05	0.375
NR_149116	chr6	18591093	18665941	introns_1	0.0634921	0.9	63	60	7.86395e-24	3.78043e-22	0.836508
NM_001366333	chr6	29672392	29673758	exons_1	0.522989	1	174	114	1.18713e-24	5.99172e-23	0.477011
NM_001109809	chr6	29672483	29673758	exons_1	0.522989	1	174	114	1.18713e-24	5.99172e-23	0.477011
NM_052828	chr6	30160211	30162211	promoters	0.029703	1	101	40	1.04848e-33	7.1471e-32	0.970297
NM_052828	chr6	30160430	30161211	exons_8	0.029703	1	101	40	1.04848e-33	7.1471e-32	0.970297
NM_001954	chr6	30898888	30899037	exons_3	0.716667	1	60	38	1.38134e-05	0.000120441	0.283333
NM_001105563	chr6	31154496	31154799	exons_15	0.0820312	0.952381	256	84	2.57069e-53	2.98771e-51	0.87035
NM_001144961	chr6	31558022	31558829	exons_1	0.0363036	0.928571	303	196	2.45064e-104	9.40984e-102	0.892268
NM_005527	chr6	31809619	31811985	exons_1	0.106509	1	169	100	3.12108e-57	3.96128e-55	0.893491
NM_004557	chr6	32217153	32217266	exons_12	0.0192308	1	52	44	1.52239e-28	8.94967e-27	0.980769
NM_001290043	chr6	32829400	32829536	exons_2	0.553846	1	195	108	1.65916e-22	7.43414e-21	0.446154
NM_002931	chr6	33211158	33211547	exons_5	0.225806	0.928571	62	56	2.91143e-16	9.10466e-15	0.702765
NM_001282847	chr6	34028120	34028366	exons_2	0.763085	0.509554	363	314	4.98262e-12	1.133e-10	-0.253531
NM_001282847	chr6	34132978	34133859	exons_1	0.6875	1	48	26	0.000108288	0.000733706	0.3125
NM_022047	chr6	35312539	35312625	introns_4	0.0625	1	32	56	4.25761e-23	1.95979e-21	0.9375
NM_001199159	chr6	36962935	36963612	exons_4	0.0138889	0.266667	216	60	1.09971e-09	1.99633e-08	0.252778
NM_031460	chr6	39311008	39314083	introns_3	0.81203	0	133	36	6.76632e-22	2.96603e-20	-0.81203
NM_031460	chr6	39313419	39315419	promoters	0.81203	0	133	36	6.76632e-22	2.96603e-20	-0.81203
NM_020737	chr6	40433132	40586940	introns_2	0.0102041	1	98	24	2.66185e-26	1.44703e-24	0.989796
NM_001012426	chr6	41598789	41602384	exons_1	0.12069	0.880952	174	84	1.70184e-34	1.20335e-32	0.760263
NM_005586	chr6	41649619	41649843	exons_2	0.0275229	1	109	38	9.83205e-34	6.7324e-32	0.972477
NM_003131	chr6	43174114	43175705	introns_1	0.32294	0.0135135	449	296	6.20161e-32	4.07186e-30	-0.309426
NM_018426	chr6	44152699	44153675	introns_20	0.188235	1	85	44	1.15911e-22	5.21666e-21	0.811765
NM_172238	chr6	50712525	50714525	promoters	0.0181818	0.380952	55	42	8.57724e-07	9.5235e-06	0.362771
NM_172238	chr6	50713526	50714094	exons_1	0.0181818	0.380952	55	42	8.57724e-07	9.5235e-06	0.362771
NM_014920	chr6	53001306	53005303	exons_1	0.0462963	0.782609	108	46	2.61226e-21	1.11921e-19	0.736312
NM_018214	chr6	53795005	53795415	exons_1	0	0.333333	185	96	1.67025e-18	6.14126e-17	0.333333
NM_001300866	chr6	75312397	75315202	exons_2	0.01983	0.932203	353	118	3.6649e-89	9.5018e-87	0.912373
NM_001300866	chr6	75492800	75494800	promoters	0	0.263158	137	114	4.73126e-13	1.14723e-11	0.263158
NM_017934	chr6	79077855	79077913	exons_39	0.00487805	0.53125	205	128	1.54524e-34	1.09517e-32	0.526372
NR_104421	chr6	97064727	97127403	introns_1	0.0847176	0.988636	602	176	8.32364e-125	4.76395e-122	0.903919
NM_001286254	chr6	97085342	97127403	introns_1	0.0847176	0.988636	602	176	8.32364e-125	4.76395e-122	0.903919
NM_001286251	chr6	97113783	97114509	exons_1	0.0847176	0.988636	602	176	8.32364e-125	4.76395e-122	0.903919
NM_001323256	chr6	97113783	97114742	exons_1	0.0847176	0.988636	602	176	8.32364e-125	4.76395e-122	0.903919
NM_001323259	chr6	97113787	97114742	exons_1	0.0847176	0.988636	602	176	8.32364e-125	4.76395e-122	0.903919
NM_001323260	chr6	97113787	97114509	exons_1	0.0847176	0.988636	602	176	8.32364e-125	4.76395e-122	0.903919
NM_182907	chr6	106097940	106099940	promoters	0.968254	0.395833	126	96	3.07462e-23	1.4239e-21	-0.572421
NM_001198	chr6	106099300	106099552	exons_1	0.968254	0.395833	126	96	3.07462e-23	1.4239e-21	-0.572421
NM_001080450	chr6	107065181	107070950	exons_1	0.333333	0.951613	336	124	4.32702e-37	3.34837e-35	0.61828
NM_001367314	chr6	107065185	107070950	exons_1	0.333333	0.951613	336	124	4.32702e-37	3.34837e-35	0.61828
NR_125845	chr6	113996061	114088936	introns_3	0.526316	1	38	84	1.96303e-12	4.57697e-11	0.473684
NM_153612	chr6	114055586	114058190	exons_1	0.526316	1	38	84	1.96303e-12	4.57697e-11	0.473684
NM_001010852	chr6	122997219	122998166	exons_2	0.667692	0.00561798	325	356	8.84777e-93	2.5083e-90	-0.662074
NM_022568	chr6	134942409	134942564	exons_2	0.045045	0.936937	333	222	2.50048e-115	1.22338e-112	0.891892
NM_001198616	chr6	136360697	136360798	exons_6	0.591731	0	387	246	2.53598e-68	4.07018e-66	-0.591731
NM_001198616	chr6	136360799	136361004	introns_6	0.445455	0	110	38	1.33464e-09	2.39273e-08	-0.445455
NM_001270508	chr6	137878432	137879351	exons_6	0.78	0.173913	50	92	5.91598e-13	1.42312e-11	-0.606087
NM_001374820	chr6	157206167	157210779	exons_9	0.136709	0.964286	395	224	7.10866e-103	2.56707e-100	0.827577
NM_001006932	chr6	166861525	166863525	promoters	0.95122	0.470588	41	68	2.65904e-08	3.84092e-07	-0.480631
NM_001286351	chr6	168294705	168310167	introns_3	0.596491	1	57	38	1.04901e-07	1.37158e-06	0.403509
NM_001286350	chr6	168306904	168309098	exons_1	0.596491	1	57	38	1.04901e-07	1.37158e-06	0.403509
NR_104425	chr6	168306904	168308703	exons_1	0.596491	1	57	38	1.04901e-07	1.37158e-06	0.403509
NM_001381939	chr6	169248417	169248973	exons_3	0.978723	0	94	72	2.49557e-47	2.5318e-45	-0.978723
NM_001381942	chr6	169248417	169249401	exons_1	0.978723	0	94	72	2.49557e-47	2.5318e-45	-0.978723
NM_001243795	chr7	2402610	2404610	promoters	0.245614	0	114	54	8.30186e-07	9.2448e-06	-0.245614
NM_001243794	chr7	2403646	2432562	introns_1	0.245614	0	114	54	8.30186e-07	9.2448e-06	-0.245614
NM_001243795	chr7	2403660	2432562	introns_1	0.245614	0	114	54	8.30186e-07	9.2448e-06	-0.245614
NM_018641	chr7	2403674	2432562	introns_1	0.245614	0	114	54	8.30186e-07	9.2448e-06	-0.245614
NM_001324281	chr7	2923132	2923333	exons_10	0.592105	1	76	56	1.42177e-10	2.85519e-09	0.407895
NM_001324281	chr7	2924366	2926738	introns_11	0.15	1	60	42	1.69154e-21	7.34064e-20	0.85
NM_001080495	chr7	5332622	5333049	exons_12	0.956113	0.00689655	319	290	1.99095e-155	2.23679e-152	-0.949216
NM_001080495	chr7	5362034	5362649	introns_18	0.144578	0.8125	83	32	9.36224e-12	2.09127e-10	0.667922
NM_001080495	chr7	5387672	5389336	exons_26	0.299401	0.0118168	1670	1354	8.19459e-122	4.60324e-119	-0.287584
NM_001367780	chr7	5500488	5502026	exons_1	0.974057	0	424	176	9.7449e-142	7.77899e-139	-0.974057
NM_001367781	chr7	5500488	5502031	exons_1	0.974057	0	424	176	9.7449e-142	7.77899e-139	-0.974057
NM_003088	chr7	5591815	5593815	promoters	0.26	0.0410959	200	146	6.82484e-09	1.08846e-07	-0.218904
NM_001371293	chr7	6577499	6580554	introns_1	0	0.928571	98	28	1.38568e-26	7.61471e-25	0.928571
NM_018106	chr7	6578501	6578720	exons_1	0	0.928571	98	28	1.38568e-26	7.61471e-25	0.928571
NM_001134388	chr7	6578566	6578720	exons_1	0	0.928571	98	28	1.38568e-26	7.61471e-25	0.928571
NR_163913	chr7	6578566	6578746	exons_1	0	0.928571	98	28	1.38568e-26	7.61471e-25	0.928571
NM_017560	chr7	6621122	6624290	exons_2	0.316498	0.103175	297	252	5.59227e-10	1.0589e-08	-0.213324
NM_001384337	chr7	27139239	27141239	promoters	0.714286	0.12	28	50	6.87152e-08	9.24759e-07	-0.594286
NR_038832	chr7	27139363	27141363	promoters	0.714286	0.12	28	50	6.87152e-08	9.24759e-07	-0.594286
NR_038832	chr7	27140364	27140539	exons_1	0.714286	0.12	28	50	6.87152e-08	9.24759e-07	-0.594286
NR_046609	chr7	27168994	27169306	introns_1	0.00980392	0.518519	102	108	3.38306e-20	1.37563e-18	0.508715
NM_182899	chr7	28809187	28809414	exons_4	0.654867	0	226	88	5.86735e-33	3.93762e-31	-0.654867
NM_006092	chr7	30451216	30453040	exons_2	0.0169492	0.977011	118	174	2.70097e-75	5.28589e-73	0.960062
NM_000168	chr7	42223296	42236970	introns_14	0	0.210526	61	38	4.93584e-05	0.000369688	0.210526
NM_001129	chr7	44112558	44112909	exons_6	0.978992	0.0786517	238	178	2.44882e-92	6.63236e-90	-0.90034
NM_001024944	chr7	66089091	66089175	exons_5	0.964	0.0465116	250	344	9.53469e-134	6.42723e-131	-0.917488
NM_178125	chr7	73324389	73324805	exons_3	0.0153846	0.923077	130	104	2.24071e-54	2.64473e-52	0.907692
NM_001281451	chr7	73324575	73326575	promoters	0.0153846	0.923077	130	104	2.24071e-54	2.64473e-52	0.907692
NM_001382662	chr7	75984959	75985578	introns_1	0.693333	1	150	54	9.92624e-09	1.54888e-07	0.306667
NM_001367562	chr7	75985208	75985578	introns_1	0.5	1	78	28	2.17521e-08	3.18603e-07	0.5
NM_031925	chr7	75987923	75987984	exons_3	0.159292	1	113	34	9.01807e-22	3.94739e-20	0.840708
NM_001110199	chr7	76285615	76287287	exons_1	0.372671	0.985507	322	138	2.86763e-42	2.58889e-40	0.612836
NM_001110354	chr7	76423949	76425949	promoters	0	1	89	42	1.26206e-37	1.01547e-35	1
NM_001110354	chr7	76424950	76425276	exons_1	0	1	89	42	1.26206e-37	1.01547e-35	1
NM_007155	chr7	76425052	76425276	exons_1	0	1	89	42	1.26206e-37	1.01547e-35	1
NM_001301128	chr7	78343778	78343960	exons_4	0.369668	0.989362	211	188	1.06349e-47	1.09356e-45	0.619693
NM_015395	chr7	98252126	98252232	exons_26	0	0.526316	114	38	4.99892e-16	1.54732e-14	0.526316
NM_152742	chr7	100171539	100171678	exons_3	0.391304	0	115	38	2.0691e-08	3.04828e-07	-0.391304
NM_173564	chr7	100493646	100494801	exons_7	0.329377	0.0412371	337	194	3.18865e-17	1.08072e-15	-0.28814
NM_001040099	chr7	100615152	100615377	exons_3	0.00943396	1	106	36	7.75738e-35	5.54982e-33	0.990566
NM_001363494	chr7	100827048	100856867	introns_1	0.0915493	0.493151	142	146	8.80437e-15	2.47289e-13	0.401601
NM_001363493	chr7	100865719	100867010	exons_1	0.575581	0.84375	172	64	5.96188e-05	0.000434104	0.268169
NM_001363494	chr7	100865719	100867012	exons_1	0.575581	0.84375	172	64	5.96188e-05	0.000434104	0.268169
NM_030961	chr7	101087312	101097967	exons_3	0.6875	0.933333	32	30	0.010914	0.0400561	0.245833
NM_016068	chr7	101244081	101246081	promoters	0.00666667	0.235294	150	68	8.45924e-09	1.33647e-07	0.228627
NM_181500	chr7	102195604	102273365	introns_1	0.978571	0.515	280	400	5.73118e-48	5.97422e-46	-0.463571
NM_001202543	chr7	102196634	102197305	exons_1	0.978571	0.515	280	400	5.73118e-48	5.97422e-46	-0.463571
NM_001359231	chr7	102289518	102300521	introns_1	0.0218341	0.327869	229	122	3.80147e-16	1.18271e-14	0.306035
NR_036245	chr7	102292102	102294102	promoters	0.0218341	0.327869	229	122	3.80147e-16	1.18271e-14	0.306035
NM_001381915	chr7	106093138	106112139	introns_1	0	0.333333	103	42	5.22783e-10	9.93881e-09	0.333333
NM_001381917	chr7	106097898	106112139	introns_1	0	0.333333	103	42	5.22783e-10	9.93881e-09	0.333333
NM_001381920	chr7	106099283	106112139	introns_1	0	0.333333	103	42	5.22783e-10	9.93881e-09	0.333333
NR_167730	chr7	106107082	106112139	introns_2	0	0.333333	103	42	5.22783e-10	9.93881e-09	0.333333
NM_001381911	chr7	106111391	106112139	introns_1	0	0.333333	103	42	5.22783e-10	9.93881e-09	0.333333
NR_036484	chr7	122302657	122304657	promoters	0.00229885	0.383333	435	120	4.59853e-34	3.20671e-32	0.381034
NM_001160264	chr7	122303511	122305511	promoters	0.00229885	0.383333	435	120	4.59853e-34	3.20671e-32	0.381034
NM_001160264	chr7	122303637	122303858	exons_1	0	0.488889	333	90	3.61054e-36	2.69759e-34	0.488889
NM_001024613	chr7	122303637	122304750	exons_1	0.00229885	0.383333	435	120	4.59853e-34	3.20671e-32	0.381034
NR_036484	chr7	122303658	122304268	exons_1	0.00229885	0.383333	435	120	4.59853e-34	3.20671e-32	0.381034
NM_001024613	chr7	122303750	122305750	promoters	0.00229885	0.383333	435	120	4.59853e-34	3.20671e-32	0.381034
NM_001868	chr7	130381630	130381863	exons_3	0.341772	0	79	26	1.94574e-05	0.000159821	-0.341772
NM_001195220	chr7	149281505	149284987	exons_2	0.948718	0	39	46	1.10865e-23	5.27111e-22	-0.948718
NR_144367	chr7	149281505	149284994	exons_1	0.948718	0	39	46	1.10865e-23	5.27111e-22	-0.948718
NM_172057	chr7	150944956	150945514	exons_1	0.191489	1	94	50	3.69888e-25	1.90819e-23	0.808511
NM_000238	chr7	150944961	150945514	exons_1	0.191489	1	94	50	3.69888e-25	1.90819e-23	0.808511
NM_031946	chr7	151123887	151128579	introns_1	0.541667	0	192	144	1.07715e-34	7.65203e-33	-0.541667
NM_001284295	chr7	151237374	151238821	exons_1	0.04	0.75	75	32	1.10205e-14	3.04736e-13	0.71
NM_019015	chr7	151237374	151238827	exons_1	0.04	0.75	75	32	1.10205e-14	3.04736e-13	0.71
NR_030407	chr7	151237420	151239420	promoters	0.04	0.75	75	32	1.10205e-14	3.04736e-13	0.71
NR_030407	chr7	151238421	151238538	exons_1	0.04	0.75	75	32	1.10205e-14	3.04736e-13	0.71
NR_126344	chr7	155644214	155644406	exons_3	0	0.285714	163	56	5.43691e-12	1.23538e-10	0.285714
NM_001346810	chr8	1548626	1549683	exons_2	0.969697	0	33	38	4.42766e-21	1.8654e-19	-0.969697
NM_001284356	chr8	10834776	10839737	introns_4	0.00486618	0.208333	411	96	3.32232e-14	8.84028e-13	0.203467
NM_017884	chr8	10838875	10840875	promoters	0.00486618	0.208333	411	96	3.32232e-14	8.84028e-13	0.203467
NM_001284356	chr8	10838899	10840899	promoters	0.00486618	0.208333	411	96	3.32232e-14	8.84028e-13	0.203467
NR_125432	chr8	10839025	10841025	promoters	0.00486618	0.208333	411	96	3.32232e-14	8.84028e-13	0.203467
NM_001164771	chr8	17543318	17543715	exons_2	0.0714286	1	42	42	2.57139e-22	1.14538e-20	0.928571
NM_006207	chr8	17628487	17628780	exons_3	0.975	0.0147059	120	136	3.08873e-68	4.87988e-66	-0.960294
NM_144962	chr8	22727221	22817636	introns_3	0.0229008	0.928571	131	84	2.99389e-48	3.15335e-46	0.905671
NM_016612	chr8	23568379	23571334	introns_1	0.828571	0.0588235	35	68	3.16201e-16	9.87811e-15	-0.769748
NM_016612	chr8	23571335	23575463	exons_2	0.9	0.0338983	180	118	6.78788e-58	8.72472e-56	-0.866102
NM_022659	chr8	26033154	26040027	introns_11	0.911111	0	45	74	2.67621e-29	1.61714e-27	-0.911111
NM_007257	chr8	26504701	26509243	exons_1	0.973154	0.219512	149	82	5.55615e-36	4.13089e-34	-0.753642
NM_024504	chr8	70068533	70069160	introns_6	0.025641	0.25	117	24	0.000519406	0.00294395	0.224359
NR_110954	chr8	79820516	79870023	introns_1	0	0.727273	154	88	2.86437e-40	2.51849e-38	0.727273
NM_139166	chr8	106769244	106771244	promoters	0.0466321	0.979167	386	96	9.12312e-80	1.92181e-77	0.932535
NM_139166	chr8	106769523	106770244	exons_2	0.0466321	0.979167	386	96	9.12312e-80	1.92181e-77	0.932535
NR_037873	chr8	123275340	123275541	exons_1	0.0240964	0.382353	83	136	2.1257e-11	4.6223e-10	0.358257
NM_001146160	chr8	124518882	124539024	introns_1	0.00847458	0.241379	118	58	2.12637e-07	2.64241e-06	0.232905
NM_001317891	chr8	124522201	124539024	introns_2	0.00847458	0.241379	118	58	2.12637e-07	2.64241e-06	0.232905
NR_027427	chr8	124523003	124539024	introns_1	0.00847458	0.241379	118	58	2.12637e-07	2.64241e-06	0.232905
NM_003033	chr8	133571693	133571887	exons_3	0	0.271429	119	140	4.8037e-13	1.16201e-11	0.271429
NM_001362798	chr8	141180747	141180854	exons_4	0.967742	0.166667	124	60	7.70176e-31	4.8978e-29	-0.801075
NM_001286646	chr8	141254630	141308095	introns_1	0.487805	0	164	164	1.10285e-31	7.16356e-30	-0.487805
NM_052924	chr8	143375669	143376524	introns_2	0.0833333	0.933333	120	30	1.58259e-20	6.47856e-19	0.85
NM_173831	chr8	143693671	143695385	exons_1	0.969697	0.0165289	330	242	6.53798e-144	6.00979e-141	-0.953168
NM_000445	chr8	143975177	143975375	exons_1	0.62069	0.157895	58	38	3.65107e-06	3.58535e-05	-0.462795
NM_145754	chr8	144472795	144474202	exons_1	0.812766	0	235	320	4.01979e-108	1.74195e-105	-0.812766
NM_001369769	chr8	144473132	144474202	exons_1	0.812766	0	235	320	4.01979e-108	1.74195e-105	-0.812766
NM_001308208	chr8	144529179	144530616	exons_1	0.0136986	0.21875	73	64	4.05847e-05	0.000310413	0.205051
NM_138367	chr8	144754192	144754321	exons_3	0.491736	0	242	100	5.54879e-25	2.82886e-23	-0.491736
NR_163472	chr9	1050486	1052486	promoters	0	0.25	58	24	6.5476e-05	0.000469206	0.25
NR_163472	chr9	1051487	1052266	exons_1	0	0.25	58	24	6.5476e-05	0.000469206	0.25
NM_006557	chr9	1051570	1052138	exons_1	0	0.25	58	24	6.5476e-05	0.000469206	0.25
NM_001042413	chr9	4117768	4118881	exons_3	0.944238	0.0416667	269	144	2.19408e-84	5.00416e-82	-0.902571
NM_001385702	chr9	23762247	23821226	introns_1	0.0217391	0.222222	92	54	7.11213e-05	0.000505018	0.200483
NM_001351471	chr9	23762250	23821226	introns_1	0.0217391	0.222222	92	54	7.11213e-05	0.000505018	0.200483
NM_001351459	chr9	23765100	23821226	introns_1	0.0217391	0.222222	92	54	7.11213e-05	0.000505018	0.200483
NM_001385705	chr9	23820935	23821156	exons_1	0.0217391	0.222222	92	54	7.11213e-05	0.000505018	0.200483
NR_136307	chr9	34971295	34971676	exons_1	0.103896	0.62069	77	58	8.76756e-11	1.81168e-09	0.516794
NM_032634	chr9	35091240	35092767	exons_1	0.178571	0.846154	56	52	4.26428e-13	1.03565e-11	0.667582
NM_001201484	chr9	35091292	35092542	introns_1	0.178571	0.846154	56	52	4.26428e-13	1.03565e-11	0.667582
NM_001288729	chr9	87706132	87708634	exons_24	0.755981	1	209	104	1.18556e-11	2.6385e-10	0.244019
NM_001253830	chr9	94064822	94085250	introns_2	0.969136	0.722222	162	72	6.06089e-08	8.25555e-07	-0.246914
NM_152422	chr9	94083428	94085428	promoters	0.969136	0.722222	162	72	6.06089e-08	8.25555e-07	-0.246914
NM_001253829	chr9	94083463	94085463	promoters	0.969136	0.722222	162	72	6.06089e-08	8.25555e-07	-0.246914
NM_152422	chr9	94084429	94084768	exons_1	0.969136	0.722222	162	72	6.06089e-08	8.25555e-07	-0.246914
NM_001253829	chr9	94084464	94084774	exons_1	0.969136	0.722222	162	72	6.06089e-08	8.25555e-07	-0.246914
NM_003837	chr9	94592824	94594824	promoters	0.0337838	0.87037	296	108	4.68334e-65	6.96394e-63	0.836587
NM_003837	chr9	94593557	94593824	exons_4	0.0337838	0.87037	296	108	4.68334e-65	6.96394e-63	0.836587
NR_102270	chr9	99367809	99369731	introns_5	0.5	0	114	32	1.01781e-09	1.85098e-08	-0.5
NR_102271	chr9	99367809	99370853	introns_1	0.5	0	114	32	1.01781e-09	1.85098e-08	-0.5
NM_133374	chr9	114016785	114032647	introns_1	0.345345	0.971154	333	624	1.09587e-105	4.37397e-103	0.625809
NM_001318040	chr9	114028733	114028972	exons_1	0.345345	0.971154	333	624	1.09587e-105	4.37397e-103	0.625809
NM_002581	chr9	116187154	116188216	exons_2	0.206522	0.705882	92	102	9.7078e-13	2.29701e-11	0.499361
NM_001365069	chr9	116423112	116426088	exons_1	0.024	1	125	58	2.01042e-46	1.98645e-44	0.976
NM_198186	chr9	116425225	116426088	exons_1	0.024	1	125	58	2.01042e-46	1.98645e-44	0.976
NM_198187	chr9	116425855	116426088	exons_1	0.024	1	125	58	2.01042e-46	1.98645e-44	0.976
NM_198188	chr9	116425876	116426088	exons_1	0.024	1	125	58	2.01042e-46	1.98645e-44	0.976
NM_001184734	chr9	116425910	116426088	exons_1	0.024	1	125	58	2.01042e-46	1.98645e-44	0.976
NM_001365069	chr9	116651794	116725770	introns_1	0.0384615	0.777778	208	144	3.04326e-52	3.47045e-50	0.739316
NM_012210	chr9	116697662	116701299	exons_1	0.0654206	1	107	110	7.89822e-56	9.77897e-54	0.934579
NM_001099679	chr9	116697665	116701299	exons_1	0.0654206	1	107	110	7.89822e-56	9.77897e-54	0.934579
NR_104603	chr9	123370108	123370980	exons_2	0.186916	0.962963	107	108	1.00285e-35	7.38359e-34	0.776047
NM_001174146	chr9	126615570	126690835	introns_2	0.287462	0.0152027	1308	1184	2.53924e-93	7.26654e-91	-0.272259
NM_001035534	chr9	127531779	127578921	introns_13	0	0.3125	50	32	4.44937e-06	4.29421e-05	0.3125
NM_022833	chr9	127531779	127568819	introns_1	0	0.3125	50	32	4.44937e-06	4.29421e-05	0.3125
NM_022833	chr9	127568073	127570073	promoters	0	0.3125	50	32	4.44937e-06	4.29421e-05	0.3125
NM_001287003	chr9	127887592	127894511	introns_1	0.142857	1	77	32	7.96691e-20	3.15906e-18	0.857143
NM_013443	chr9	127890637	127891043	exons_1	0.142857	1	77	32	7.96691e-20	3.15906e-18	0.857143
NR_104629	chr9	127890656	127891043	exons_1	0.142857	1	77	32	7.96691e-20	3.15906e-18	0.857143
NR_039815	chr9	128392620	128392620	TSSes	0.017094	0.242424	117	66	8.22026e-07	9.1674e-06	0.22533
NM_016307	chr9	129666127	129719230	introns_1	1	0	45	96	2.68368e-40	2.36648e-38	-1
NM_020064	chr9	132581605	132583605	promoters	0.316901	0	284	136	1.5645e-19	6.04554e-18	-0.316901
NM_020064	chr9	132582606	132583263	exons_1	0.316901	0	284	136	1.5645e-19	6.04554e-18	-0.316901
NM_001122823	chr9	133031165	133042086	introns_1	0	1	124	76	1.01931e-59	1.36814e-57	1
NM_001286709	chr9	133031165	133050782	introns_1	0	1	124	76	1.01931e-59	1.36814e-57	1
NM_001282629	chr9	133152948	133154242	exons_1	0.16129	1	93	42	6.4785e-24	3.12431e-22	0.83871
NM_001288573	chr9	133152948	133154261	exons_1	0.16129	1	93	42	6.4785e-24	3.12431e-22	0.83871
NM_007371	chr9	134053591	134067944	introns_11	0	0.580645	128	62	1.41703e-23	6.70579e-22	0.580645
NM_007371	chr9	134067026	134069026	promoters	0	0.580645	128	62	1.41703e-23	6.70579e-22	0.580645
NM_144653	chr9	136049636	136050580	exons_5	0.981132	0.0272727	477	660	3.53547e-284	1.34056e-280	-0.953859
NM_032928	chr9	136791344	136791424	exons_1	0	0.210526	71	38	2.12395e-05	0.00017324	0.210526
NM_021569	chr9	137162846	137163003	exons_12	0.931818	0	44	50	4.75e-25	2.42979e-23	-0.931818
NR_038389	chr9	137252497	137254497	promoters	0.0759494	0.948276	158	116	4.32269e-55	5.20335e-53	0.872326
NM_001256699	chr9	137252662	137252965	exons_1	0.0759494	0.948276	158	116	4.32269e-55	5.20335e-53	0.872326
NM_001256700	chr9	137252827	137252965	exons_1	0.0759494	0.948276	158	116	4.32269e-55	5.20335e-53	0.872326
NR_046340	chr9	137252839	137252965	exons_1	0.0759494	0.948276	158	116	4.32269e-55	5.20335e-53	0.872326
NR_038389	chr9	137252875	137252975	exons_1	0.0759494	0.948276	158	116	4.32269e-55	5.20335e-53	0.872326
NM_017723	chr9	137278653	137282641	exons_2	0.763052	0	249	82	8.38351e-41	7.47957e-39	-0.763052
NM_017820	chr9	137367990	137372904	introns_2	0.944444	0.0625	72	32	2.21138e-20	9.02826e-19	-0.881944
NM_017745	chrX	40077970	40097214	introns_1	0.976744	0.289474	43	76	1.74518e-15	5.12471e-14	-0.687271
NM_000266	chrX	43958853	43973303	introns_1	0.0212766	0.235294	47	34	0.00181136	0.00867613	0.214018
NM_000266	chrX	43972390	43974390	promoters	0.0212766	0.235294	47	34	0.00181136	0.00867613	0.214018
NM_001166418	chrX	72571843	72573843	promoters	0.0628931	0.45679	159	162	3.61718e-17	1.22051e-15	0.393897
NM_001166420	chrX	72572103	72574103	promoters	0.0628931	0.45679	159	162	3.61718e-17	1.22051e-15	0.393897
NM_001166420	chrX	72572651	72573103	exons_1	0.0628931	0.45679	159	162	3.61718e-17	1.22051e-15	0.393897
NM_014782	chrX	101655281	101657715	exons_1	0.844828	0.576923	58	52	0.00164283	0.00799257	-0.267905
NM_001170961	chrX	131278461	131278751	exons_9	0	0.5	134	64	1.43761e-20	5.89303e-19	0.5

## Sheet: Table S5
Supplementary Table 5. The details of the DMPs, DMEs and DMIs for human and rat comparison using WGBS dataset.
ID	Chromosome	Start	End	Feature	Methylation (Rat)	Methylation (Human)	Read (Rat)	Read (Human)	Pvalue	Qvalue	Methylation Difference (Human - Rat)
NM_152486	chr1	943908	944574	exons_7	0.9	0.482759	40	29	0.000105199	0.00144211	-0.417241
NM_198317	chr1	961826	962047	exons_4	1	0.0588235	20	17	5.44962e-11	3.33246e-09	-0.941176
NM_032129	chr1	965481	967481	promoters	0.266667	0.8125	15	16	0.00170349	0.0190644	0.545833
NM_032129	chr1	966704	966803	exons_2	0.266667	0.8125	15	16	0.00170349	0.0190644	0.545833
NM_002744	chr1	2059592	2135261	introns_4	0.209302	0.903226	43	62	7.22443e-14	7.55216e-12	0.693923
NM_001350804	chr1	2072461	2074461	promoters	0.2	0.934783	30	46	8.29989e-12	6.28775e-10	0.734783
NM_001350805	chr1	2072985	2074985	promoters	0.209302	0.903226	43	62	7.22443e-14	7.55216e-12	0.693923
NM_001350804	chr1	2073930	2098346	introns_1	0.209302	0.903226	43	62	7.22443e-14	7.55216e-12	0.693923
NM_001350806	chr1	2073930	2135261	introns_1	0.209302	0.903226	43	62	7.22443e-14	7.55216e-12	0.693923
NM_001350805	chr1	2073986	2074275	exons_1	0.25	0.952381	16	21	2.81708e-06	4.97763e-05	0.702381
NM_001350805	chr1	2074276	2135261	introns_1	0.230769	0.8125	13	16	0.00125753	0.0145253	0.581731
NM_001242672	chr1	2799868	2801868	promoters	0.0909091	0.986486	55	74	6.66571e-30	5.42299e-27	0.895577
NM_001242672	chr1	2800044	2800868	exons_8	0.0909091	0.986486	55	74	6.66571e-30	5.42299e-27	0.895577
NM_014448	chr1	3475970	3476062	exons_10	0.0333333	1	30	36	1.54073e-19	3.77109e-17	0.966667
NM_001204186	chr1	3729449	3732746	introns_1	0.722222	1	18	19	0.00458535	0.0458339	0.277778
NM_001204187	chr1	3729449	3730926	introns_1	0.722222	1	18	19	0.00458535	0.0458339	0.277778
NM_001204188	chr1	3729449	3731462	introns_1	0.722222	1	18	19	0.00458535	0.0458339	0.277778
NM_005427	chr1	3730149	3730926	introns_2	0.722222	1	18	19	0.00458535	0.0458339	0.277778
NM_015557	chr1	6128046	6128218	exons_18	0.916667	0.025641	60	78	5.21991e-31	5.74558e-28	-0.891026
NM_001367473	chr1	6452097	6457183	introns_2	0.241935	0	62	69	6.98963e-07	1.34974e-05	-0.241935
NM_015215	chr1	7091372	7249490	introns_1	0.48	1	25	28	7.68774e-07	1.46939e-05	0.52
NM_005026	chr1	9722244	9722356	exons_5	0.388889	0.954545	18	22	4.4332e-05	0.000638599	0.565657
NM_001170754	chr1	10976257	10982011	introns_2	0.5	0.947368	12	19	0.00327591	0.0341688	0.447368
NM_006610	chr1	11037693	11037811	exons_5	0.857143	0.0454545	14	22	1.59322e-07	3.53228e-06	-0.811688
NM_018438	chr1	11668656	11668944	exons_2	0.0666667	0.941176	15	17	6.25735e-08	1.51865e-06	0.87451
NR_107000	chr1	12165942	12167942	promoters	0.538462	0	13	17	0.000129329	0.0017549	-0.538462
NM_001066	chr1	12165990	12167990	promoters	0.538462	0	13	17	0.000129329	0.0017549	-0.538462
NM_001066	chr1	12167170	12188795	introns_1	0.538462	0	13	17	0.000129329	0.0017549	-0.538462
NM_015378	chr1	12266881	12267011	exons_14	1	0.375	13	16	5.72126e-05	0.000813497	-0.625
NM_012231	chr1	13816427	13816570	exons_1	0.37931	0.957447	29	47	1.15269e-08	3.2097e-07	0.578136
NM_201628	chr1	15094934	15101542	introns_3	0	0.882353	16	17	8.49027e-09	2.43292e-07	0.882353
NR_027136	chr1	15124374	15152290	introns_4	0.111111	0.9	18	20	2.02134e-07	4.38785e-06	0.788889
NM_024758	chr1	15583193	15583395	exons_6	0.833333	0.214286	12	14	0.00108186	0.0126393	-0.619048
NM_012387	chr1	17356357	17356459	exons_13	0	1	13	22	1.07883e-11	7.97907e-10	1
NM_000929	chr1	20089789	20089895	exons_4	1	0.0666667	20	15	2.86738e-10	1.3248e-08	-0.933333
NR_033887	chr1	20362395	20373594	introns_2	0.266667	0	30	34	0.000247412	0.00322843	-0.266667
NM_001113348	chr1	21290157	21345375	introns_1	0.5	1	12	22	0.000104566	0.00143449	0.5
NM_001330383	chr1	21597961	21598064	exons_1	0.435897	0.963636	39	55	1.78281e-09	6.23551e-08	0.527739
NM_001145657	chr1	21597961	21598040	exons_1	0.423077	0.944444	26	36	2.78145e-06	4.92398e-05	0.521368
NM_001145657	chr1	21598041	21598399	introns_1	0.461538	1	13	19	7.51825e-05	0.00105379	0.538462
NM_005529	chr1	21831215	21831324	exons_14	0.666667	1	12	18	0.00399931	0.0406712	0.333333
NM_001309192	chr1	22893047	22905986	introns_1	0	0.975	27	40	1.57196e-19	3.77109e-17	0.975
NM_004442	chr1	22895472	22895580	exons_1	0	0.975	27	40	1.57196e-19	3.77109e-17	0.975
NM_001143778	chr1	23437424	23437472	exons_13	0.5	0	26	27	1.61308e-06	2.9419e-05	-0.5
NM_002167	chr1	23557926	23558415	exons_1	0	0.96	13	25	1.10902e-10	6.15783e-09	0.96
NM_000437	chr1	25976774	25982363	introns_4	0	1	16	22	6.37523e-13	6.14914e-11	1
NM_001039775	chr1	26343745	26346712	exons_19	0.592593	0.918919	27	37	0.00163605	0.0183994	0.326326
NM_052943	chr1	27005020	27006957	exons_1	0	0.913043	12	23	7.05127e-09	2.06161e-07	0.913043
NM_005281	chr1	27393794	27395813	exons_2	0	0.869565	13	23	1.84666e-08	5.01518e-07	0.869565
NM_005248	chr1	27614430	27614583	exons_2	1	0.0769231	13	26	7.57017e-10	2.99478e-08	-0.923077
NM_005704	chr1	29258505	29258776	exons_3	1	0.514286	28	35	5.79586e-07	1.13801e-05	-0.485714
NM_001856	chr1	31681068	31682933	introns_34	0	0.941176	14	17	2.77392e-09	9.13831e-08	0.941176
NM_001370212	chr1	33280124	33280457	exons_3	1	0.266667	14	15	4.36241e-06	7.47523e-05	-0.733333
NM_001281956	chr1	33714776	33716285	introns_21	0.642857	1	14	23	0.000883404	0.0105963	0.357143
NM_001005752	chr1	34784738	34786364	exons_2	0	1	13	26	1.83948e-12	1.61598e-10	1
NM_001080418	chr1	34886286	34899668	introns_7	0.571429	0	14	24	7.77582e-06	0.000126633	-0.571429
NM_014466	chr1	36086931	36087045	exons_6	0.571429	0.96	14	25	0.00243429	0.0261935	0.388571
NM_005202	chr1	36115753	36125056	introns_2	0	0.772727	18	22	2.6257e-08	6.90058e-07	0.772727
NM_001038633	chr1	37629950	37631843	introns_1	0.25	0.772727	16	22	0.00108277	0.0126393	0.522727
NM_001242910	chr1	37629950	37632286	introns_1	0.25	0.772727	16	22	0.00108277	0.0126393	0.522727
NM_001301701	chr1	44221641	44247938	introns_1	1	0.6	13	25	0.00144238	0.0164472	-0.4
NR_110056	chr1	44226004	44241914	introns_2	1	0.6	13	25	0.00144238	0.0164472	-0.4
NM_147192	chr1	46512043	46516216	exons_2	0.464286	0.925926	28	27	0.000102571	0.00140816	0.46164
NM_145279	chr1	46612904	46613371	exons_3	0.666667	0.0588235	21	17	4.51332e-05	0.000648144	-0.607843
NM_001290405	chr1	47216290	47220174	exons_1	1	0.25	16	20	2.7632e-07	5.79004e-06	-0.75
NM_001290406	chr1	47216291	47220174	exons_1	1	0.25	16	20	2.7632e-07	5.79004e-06	-0.75
NM_004631	chr1	53242370	53247056	exons_1	1	0.558824	35	34	4.21656e-07	8.40259e-06	-0.441176
NM_001256865	chr1	65384193	65384326	exons_6	0.333333	1	15	20	1.81321e-06	3.26867e-05	0.666667
NM_024763	chr1	66822361	66822517	exons_2	1	0.466667	13	15	0.000351208	0.00448894	-0.533333
NM_001366839	chr1	70076077	70076298	exons_1	0.432432	0.972973	37	37	3.78479e-08	9.49343e-07	0.540541
NM_030965	chr1	76868743	77044203	introns_1	0.125	1	16	14	5.89155e-08	1.43172e-06	0.875
NM_001320273	chr1	76868743	77050257	introns_1	0.5	1	30	33	1.51562e-07	3.38535e-06	0.5
NM_001320274	chr1	76868743	77062974	introns_1	0.577778	0.960784	45	51	1.8971e-06	3.41332e-05	0.383007
NM_001366004	chr1	81969178	81969387	exons_6	0.714286	1	14	26	0.00234842	0.0253277	0.285714
NM_012152	chr1	84811602	84814171	exons_1	0.0666667	1	15	12	4.22135e-08	1.04484e-06	0.933333
NM_012152	chr1	84866139	84893015	introns_2	0.611111	1	18	23	0.000248862	0.00324509	0.388889
NM_001554	chr1	85582740	85583949	exons_5	0.833333	0.0714286	12	14	3.01645e-05	0.000447257	-0.761905
NR_135038	chr1	90789488	90851482	introns_2	0.666667	0.318182	45	44	0.000891935	0.0106781	-0.348485
NR_147930	chr1	90832197	90851482	introns_1	0.666667	0.318182	45	44	0.000891935	0.0106781	-0.348485
NR_147931	chr1	90837766	90851482	introns_1	1	0.461538	16	13	0.00017245	0.00230657	-0.538462
NM_207189	chr1	91977043	91977393	exons_2	0.6	1	20	13	0.0019099	0.0211718	0.4
NM_001308248	chr1	92736398	92736627	exons_2	1	0.16	13	25	3.75148e-08	9.42251e-07	-0.84
NM_001261408	chr1	93592394	93642303	introns_1	0	0.941176	13	17	5.95602e-09	1.78264e-07	0.941176
NM_001258340	chr1	94867418	94891129	introns_1	0.9375	0.384615	16	13	0.000854362	0.0102611	-0.552885
NR_146575	chr1	94867418	94888657	introns_1	0.9375	0.384615	16	13	0.000854362	0.0102611	-0.552885
NM_001408	chr1	109264078	109264365	exons_10	0.705882	1	34	36	5.63344e-05	0.00080223	0.294118
NM_031936	chr1	109542422	109544639	exons_2	0.0322581	0.878788	31	33	1.05524e-13	1.07314e-11	0.84653
NM_001257361	chr1	109630943	109632055	exons_1	0.933333	0	30	28	5.41209e-16	7.61014e-14	-0.933333
NM_001368809	chr1	109630943	109632051	exons_1	0.933333	0	30	28	5.41209e-16	7.61014e-14	-0.933333
NM_004980	chr1	111981621	111982798	exons_1	0.535714	0	28	25	7.50998e-07	1.44426e-05	-0.535714
NM_002506	chr1	115285917	115286807	exons_1	0.214286	0.956522	14	23	1.04073e-06	1.94741e-05	0.742236
NM_001012758	chr1	145844629	145846629	promoters	0.76	0.121212	25	33	3.45991e-07	7.11449e-06	-0.638788
NM_001012758	chr1	145846013	145846196	exons_2	0.5	0	12	20	0.000160109	0.00215074	-0.5
NM_001012758	chr1	145846598	145846690	exons_4	1	0.307692	13	13	2.88301e-05	0.000430199	-0.692308
NM_181703	chr1	147756199	147759271	exons_1	0.807692	0.0789474	26	38	6.27853e-10	2.54807e-08	-0.728745
NM_001172648	chr1	151714677	151715618	introns_1	0.266667	1	15	14	4.36241e-06	7.47523e-05	0.733333
NM_001172649	chr1	151714677	151715875	introns_1	0.266667	1	15	14	4.36241e-06	7.47523e-05	0.733333
NR_024237	chr1	151844243	151850232	introns_2	0	1	15	16	5.63622e-11	3.39116e-09	1
NM_182578	chr1	151847415	151847737	introns_1	0	1	15	16	5.63622e-11	3.39116e-09	1
NM_001282625	chr1	156115275	156130616	introns_1	0.2	0.9	15	20	1.24343e-05	0.000195521	0.7
NM_001257374	chr1	156125169	156127169	promoters	0.2	0.9	15	20	1.24343e-05	0.000195521	0.7
NM_001257374	chr1	156126224	156130616	introns_1	0.2	0.9	15	20	1.24343e-05	0.000195521	0.7
NM_001282624	chr1	156126916	156130616	introns_2	0.2	0.9	15	20	1.24343e-05	0.000195521	0.7
NM_001282625	chr1	156136214	156136436	exons_6	0.166667	1	24	33	4.90232e-13	4.75297e-11	0.833333
NM_001286349	chr1	157993729	158084421	introns_1	0.5	1	20	20	3.25819e-05	0.000479302	0.5
NM_018240	chr1	157993729	158076112	introns_1	0.5	1	20	20	3.25819e-05	0.000479302	0.5
NM_020789	chr1	159928158	159929018	exons_3	0	0.894737	12	19	4.55498e-08	1.12148e-06	0.894737
NM_020789	chr1	159930692	159930867	exons_8	1	0.333333	22	15	9.21464e-07	1.73815e-05	-0.666667
NM_001206665	chr1	160092282	160092695	exons_2	0	0.9375	18	16	3.86282e-10	1.68096e-08	0.9375
NM_001206665	chr1	160094869	160095246	exons_5	0.647059	1	17	22	0.000729417	0.0088514	0.352941
NM_005099	chr1	161184302	161191564	exons_1	0	0.916667	17	12	1.88261e-08	5.08332e-07	0.916667
NM_001320336	chr1	161191404	161192064	introns_1	0	0.916667	17	12	1.88261e-08	5.08332e-07	0.916667
NM_001126060	chr1	162367052	162370023	exons_1	0.848485	0	33	40	9.20734e-17	1.55214e-14	-0.848485
NM_001164757	chr1	162367052	162370475	exons_1	0.848485	0	33	40	9.20734e-17	1.55214e-14	-0.848485
NM_001300968	chr1	169459669	169461669	promoters	1	0	15	26	2.16353e-13	2.14201e-11	-1
NM_001300968	chr1	169460253	169460669	exons_2	1	0	15	26	2.16353e-13	2.14201e-11	-1
NM_001366448	chr1	174989849	174995308	exons_1	0.923077	0.4	13	15	0.00234585	0.0253277	-0.523077
NM_020318	chr1	176594524	176595595	exons_3	0.171875	0.975309	64	81	7.89923e-27	3.79001e-24	0.803434
NM_004319	chr1	177032456	177032849	exons_3	0.928571	0	14	17	3.36511e-09	1.06545e-07	-0.928571
NM_001329717	chr1	179813779	179816198	exons_2	0.947368	0	19	25	6.46961e-13	6.20817e-11	-0.947368
NM_000721	chr1	181776229	181781426	introns_20	0.230769	1	13	17	8.93227e-07	1.68659e-05	0.769231
NM_000721	chr1	181798292	181808084	exons_3	0.357143	0.94	42	50	4.87098e-10	2.03229e-08	0.582857
NR_147896	chr1	199162571	199391320	introns_3	0.433333	0.833333	30	36	0.000578422	0.00717258	0.4
NM_020443	chr1	201649426	201712816	introns_1	0.307692	0	13	24	0.00229181	0.0248925	-0.307692
NM_001290553	chr1	202951165	202957908	introns_1	0	1	14	16	1.20591e-10	6.50288e-09	1
NM_015999	chr1	202951165	202958184	introns_1	0	1	14	16	1.20591e-10	6.50288e-09	1
NM_001290557	chr1	202954308	202958184	introns_1	0	1	14	16	1.20591e-10	6.50288e-09	1
NM_001290629	chr1	202954308	202958474	introns_1	0	1	14	16	1.20591e-10	6.50288e-09	1
NM_000674	chr1	203128785	203129182	exons_2	0.4375	0.0294118	48	68	1.79877e-08	4.91366e-07	-0.408088
NM_001365066	chr1	203128785	203129257	exons_1	0.4375	0.0294118	48	68	1.79877e-08	4.91366e-07	-0.408088
NM_006338	chr1	204617170	204620218	exons_1	0.466667	1	15	20	3.93931e-05	0.000571857	0.533333
NM_001083924	chr1	207018522	207023480	exons_1	0.5	1	16	25	1.89538e-05	0.000292144	0.5
NM_145759	chr1	211353239	211353457	exons_2	0	1	12	24	1.29038e-11	9.39515e-10	1
NM_001319294	chr1	215567769	215573785	introns_1	0.875	0.0769231	16	13	4.45013e-06	7.54948e-05	-0.798077
NM_206594	chr1	216503246	216507183	exons_1	0.894737	0.470588	19	17	0.00462408	0.0460734	-0.424149
NM_001350124	chr1	216503251	216507183	exons_1	0.894737	0.470588	19	17	0.00462408	0.0460734	-0.424149
NM_001243518	chr1	216722429	216724429	promoters	0.272727	0	22	20	0.00323872	0.0337997	-0.272727
NM_001243519	chr1	216722472	216724472	promoters	0.272727	0	22	20	0.00323872	0.0337997	-0.272727
NR_110794	chr1	218046254	218051154	introns_2	0.642857	1	14	17	0.00249723	0.0268398	0.357143
NM_001376929	chr1	219910445	219915948	exons_1	1	0.0487805	33	41	1.47958e-20	4.07146e-18	-0.95122
NM_001377229	chr1	222943333	222983079	introns_2	0.9	0.333333	20	18	0.000173479	0.00231867	-0.566667
NM_001003665	chr1	226547763	226549763	promoters	0.733333	0	15	17	1.07662e-06	2.00855e-05	-0.733333
NM_001003665	chr1	226549107	226596801	introns_1	0.862069	0.540541	29	37	0.00408314	0.0414787	-0.321528
NM_001003665	chr1	226602004	226609229	exons_4	0	0.882353	12	17	1.30899e-07	2.96289e-06	0.882353
NM_001323930	chr1	227728787	227747691	introns_1	1	0.352941	16	17	8.00995e-06	0.000129993	-0.647059
NR_136654	chr1	227728787	227758994	introns_1	1	0.352941	16	17	8.00995e-06	0.000129993	-0.647059
NM_001323932	chr1	227731748	227747691	introns_1	1	0.352941	16	17	8.00995e-06	0.000129993	-0.647059
NM_001161465	chr1	227733907	227734032	exons_3	1	0.352941	16	17	8.00995e-06	0.000129993	-0.647059
NM_003395	chr1	227918656	227922000	exons_1	0.25	0.974026	72	77	4.75496e-23	1.7795e-20	0.724026
NM_001310327	chr1	228173569	228175569	promoters	1	0	13	14	9.65729e-10	3.69365e-08	-1
NM_001010867	chr1	228175122	228182257	exons_2	1	0	13	14	9.65729e-10	3.69365e-08	-1
NM_001024940	chr1	228407935	228408751	exons_1	0.148148	0.967742	27	31	6.45987e-12	5.1003e-10	0.819594
NM_001100	chr1	229433094	229435094	promoters	1	0.0714286	17	14	3.36511e-09	1.06545e-07	-0.928571
NM_001100	chr1	229433128	229434003	introns_6	1	0.0714286	17	14	3.36511e-09	1.06545e-07	-0.928571
NM_014409	chr1	229593118	229595094	exons_1	0.222222	0.926829	27	41	6.2912e-10	2.54807e-08	0.704607
NM_001122835	chr1	230928937	230929093	exons_6	1	0.72	19	25	0.00283558	0.030045	-0.28
NM_001300845	chr1	234231417	234231741	exons_2	0.785714	0	28	32	1.73533e-12	1.53167e-10	-0.785714
NM_001300845	chr1	234309101	234309320	exons_1	0.8	0	15	13	1.43679e-06	2.65402e-05	-0.8
NM_014322	chr1	241604580	241639881	introns_3	0.866667	0.32	15	25	0.00047077	0.00592803	-0.546667
NM_001367482	chr1	241679485	241679595	exons_6	0	1	13	20	2.88779e-11	1.93679e-09	1
NM_006027	chr1	241857345	241857482	exons_4	0.916667	0.2	12	20	3.13168e-05	0.000463607	-0.716667
NM_001350249	chr1	243418077	243426426	introns_3	0.888889	0.357143	18	14	0.00127642	0.0147071	-0.531746
NM_018012	chr1	245646281	245684232	introns_8	1	0.611111	16	18	0.00118241	0.013768	-0.388889
NM_015431	chr1	247875900	247880136	exons_6	0.142857	1	14	14	2.30405e-07	4.93208e-06	0.857143
NM_001322464	chr1	248810446	248812370	exons_1	0.8	0	15	13	1.43679e-06	2.65402e-05	-0.8
NM_014974	chr10	345111	348640	introns_11	1	0.105263	13	19	2.04695e-08	5.44071e-07	-0.894737
NM_014974	chr10	486531	689493	introns_36	0.866667	0.0952381	15	21	1.00788e-06	1.89353e-05	-0.771429
NM_018702	chr10	1363918	1379073	introns_8	0.75	0	16	12	6.80199e-06	0.000111844	-0.75
NM_002051	chr10	8073739	8075198	exons_3	0.0769231	0.736842	13	19	9.24615e-05	0.0012731	0.659919
NM_001318337	chr10	13659323	13659490	exons_5	1	0.538462	39	52	8.22267e-09	2.37076e-07	-0.461538
NM_018027	chr10	13858913	14330057	introns_1	0.896104	0.367347	77	98	1.02932e-13	1.05828e-11	-0.528757
NR_134578	chr10	14083814	14097009	introns_1	0.925926	0.276596	27	47	1.00052e-08	2.84959e-07	-0.64933
NM_213569	chr10	20812941	20961671	introns_1	0.733333	1	30	35	0.000214852	0.0028312	0.266667
NM_006393	chr10	20889950	20896957	introns_21	0.5	1	14	18	0.000163287	0.0021887	0.5
NM_001282746	chr10	22981701	22998147	introns_5	0	0.916667	15	12	5.27067e-08	1.28418e-06	0.916667
NM_001365862	chr10	23201916	23204255	exons_1	0.0689655	0.361111	29	36	0.00340022	0.035308	0.292146
NM_001371909	chr10	23202696	23204255	exons_1	0.0689655	0.361111	29	36	0.00340022	0.035308	0.292146
NM_001134366	chr10	26219277	26223886	introns_4	0	0.857143	15	21	1.08554e-08	3.04994e-07	0.857143
NM_001276451	chr10	49364066	49366381	exons_1	0	0.952381	26	42	2.75463e-18	5.72718e-16	0.952381
NM_001329906	chr10	70435286	70435983	exons_2	0.264706	1	34	41	6.61832e-14	7.07669e-12	0.735294
NM_001244889	chr10	71285326	71285429	exons_3	0.533333	1	15	22	9.84791e-05	0.00135396	0.466667
NM_022124	chr10	71511213	71566741	introns_3	0.483871	1	31	42	6.00351e-09	1.78264e-07	0.516129
NM_022124	chr10	71799111	71799280	exons_3	0.928571	0.588235	28	34	0.00131073	0.0150561	-0.340336
NM_001244950	chr10	72072911	72088139	introns_10	0.615385	0.0357143	13	28	3.35681e-05	0.000492263	-0.57967
NM_001134434	chr10	72086226	72086992	exons_1	0.615385	0.0357143	13	28	3.35681e-05	0.000492263	-0.57967
NM_001305581	chr10	75438495	76036007	introns_2	0.596774	0.974026	62	77	3.84308e-09	1.2086e-07	0.377252
NM_153367	chr10	79386459	79394275	introns_1	1	0.428571	16	14	7.52721e-05	0.00105426	-0.571429
NM_001080114	chr10	86732887	86736072	exons_6	0	0.95	12	20	2.84215e-09	9.1852e-08	0.95
NM_138316	chr10	89612049	89643696	introns_2	0.357143	0.923077	14	26	0.000125881	0.00171433	0.565934
NM_148977	chr10	89612049	89644599	introns_1	0.357143	0.923077	14	26	0.000125881	0.00171433	0.565934
NM_014391	chr10	90915543	90915641	exons_2	1	0	24	28	2.40662e-17	4.54876e-15	-1
NM_013451	chr10	93347617	93347782	exons_18	1	0.105263	15	19	4.6107e-09	1.42943e-07	-0.894737
NM_013451	chr10	93372930	93373085	exons_31	0	1	13	24	4.32204e-12	3.53162e-10	1
NM_001377207	chr10	95410778	95421960	introns_1	1	0.125	19	24	1.17724e-10	6.42233e-09	-0.875
NM_001034956	chr10	95414656	95421960	introns_1	1	0.125	19	24	1.17724e-10	6.42233e-09	-0.875
NM_001377197	chr10	95414863	95421960	introns_1	1	0.125	19	24	1.17724e-10	6.42233e-09	-0.875
NM_012465	chr10	96373810	96376691	introns_3	1	0.05	16	20	9.83082e-11	5.50761e-09	-0.95
NM_003061	chr10	97066087	97157817	introns_33	0.933333	0.564516	45	62	7.70914e-06	0.000125656	-0.368817
NM_001010917	chr10	97865590	97871578	exons_1	0.6	0.926829	25	41	0.0012742	0.0146997	0.326829
NM_018058	chr10	97865715	97880248	introns_1	0.6	0.926829	25	41	0.0012742	0.0146997	0.326829
NR_130724	chr10	101140266	101142266	promoters	0.526316	0	19	17	5.54012e-05	0.000790142	-0.526316
NR_130724	chr10	101140688	101141266	exons_1	0.526316	0	19	17	5.54012e-05	0.000790142	-0.526316
NM_033163	chr10	101770109	101770619	exons_1	0	1	13	17	1.48088e-10	7.74028e-09	1
NM_033164	chr10	101770131	101770619	exons_1	0	1	13	17	1.48088e-10	7.74028e-09	1
NM_014631	chr10	103660983	103661114	exons_2	0.903226	0	31	28	3.56487e-15	4.57403e-13	-0.903226
NM_001348099	chr10	116096765	116125220	introns_5	0.692308	1	13	23	0.00260175	0.0278035	0.307692
NM_001330164	chr10	116671192	116675418	exons_1	0.73913	0.955224	46	67	0.000822536	0.00990738	0.216093
NM_001330164	chr10	116707286	116834934	introns_11	0.709677	0.95122	31	41	0.00412989	0.0419308	0.241542
NM_004098	chr10	117545817	117548064	introns_1	0.857143	0	21	16	5.39636e-09	1.63923e-07	-0.857143
NM_001318133	chr10	125576875	125661020	introns_1	1	0.555556	12	18	0.00151171	0.0171125	-0.444444
NM_001377543	chr10	127043165	127052680	introns_7	0.214286	0.961538	14	26	3.70215e-07	7.571e-06	0.747253
NM_006426	chr10	132187103	132190746	introns_1	0.833333	0.25	18	20	0.000196918	0.00261329	-0.583333
NM_152643	chr10	133160570	133167380	introns_1	1	0	15	12	1.12458e-09	4.16277e-08	-1
NR_149718	chr10	133465251	133465565	exons_10	0.857143	0	14	21	7.05127e-09	2.06161e-07	-0.857143
NM_000773	chr10	133526362	133528362	promoters	0.85	0	20	17	5.12593e-09	1.57498e-07	-0.85
NM_000773	chr10	133527573	133528480	introns_1	0.85	0	20	17	5.12593e-09	1.57498e-07	-0.85
NM_001303029	chr11	403078	403263	exons_9	0.823529	0.1	17	20	3.07713e-06	5.42178e-05	-0.723529
NM_173573	chr11	555305	555503	exons_2	0.941176	0	17	14	2.77392e-09	9.13831e-08	-0.941176
NM_003957	chr11	1390376	1436039	introns_1	0.966667	0.7	30	40	0.00199408	0.0219878	-0.266667
NM_001282218	chr11	1410907	1436039	introns_1	1	0.375	17	16	1.1083e-05	0.000176498	-0.625
NM_001256630	chr11	1411634	1436039	introns_1	1	0.375	17	16	1.1083e-05	0.000176498	-0.625
NM_001297661	chr11	2402611	2402652	exons_1	0	0.954545	19	22	3.01669e-12	2.52002e-10	0.954545
NM_005706	chr11	2402611	2403876	exons_1	0	0.954545	19	22	3.01669e-12	2.52002e-10	0.954545
NM_000218	chr11	2778038	2847766	introns_5	0.9	0.543478	40	46	0.00016011	0.00215074	-0.356522
NM_001004755	chr11	4995336	4997481	introns_1	0.375	1	16	15	2.43387e-05	0.000369664	0.625
NM_001004052	chr11	6169326	6171326	promoters	0.0666667	0.863636	15	22	3.11677e-07	6.48733e-06	0.79697
NM_001004052	chr11	6169355	6170326	exons_1	0.0666667	0.863636	15	22	3.11677e-07	6.48733e-06	0.79697
NM_176821	chr11	7957537	7961322	exons_1	0	0.368421	12	19	0.0044029	0.0443896	0.368421
NM_001376505	chr11	8717893	8810516	introns_1	0.923077	0.290323	26	31	3.17765e-07	6.57018e-06	-0.632754
NM_001376504	chr11	8726210	8750620	introns_1	0.923077	0.290323	26	31	3.17765e-07	6.57018e-06	-0.632754
NM_001376506	chr11	8726210	8810516	introns_1	0.923077	0.290323	26	31	3.17765e-07	6.57018e-06	-0.632754
NM_001376500	chr11	8729950	8730620	exons_1	0.923077	0.290323	26	31	3.17765e-07	6.57018e-06	-0.632754
NM_005418	chr11	8729950	8731209	exons_1	0.923077	0.290323	26	31	3.17765e-07	6.57018e-06	-0.632754
NM_001351804	chr11	13277073	13309986	introns_1	0.941176	0.05	17	20	2.54742e-09	8.60422e-08	-0.891176
NM_001030273	chr11	13277924	13309986	introns_1	0.941176	0.05	17	20	2.54742e-09	8.60422e-08	-0.891176
NM_006108	chr11	14135569	14243331	introns_6	1	0	14	15	2.33029e-10	1.13553e-08	-1
NM_000525	chr11	17385249	17388659	exons_1	0.214286	0.954545	42	66	7.89917e-17	1.35605e-14	0.74026
NM_001166290	chr11	17385249	17387846	exons_1	0.321429	0.956522	28	46	1.40471e-09	5.10386e-08	0.635093
NM_000525	chr11	17387659	17389659	promoters	0	0.95	14	20	4.8874e-10	2.03229e-08	0.95
NM_001166290	chr11	17387847	17389173	introns_1	0	0.95	14	20	4.8874e-10	2.03229e-08	0.95
NM_001377296	chr11	17387847	17388017	introns_1	0	0.95	14	20	4.8874e-10	2.03229e-08	0.95
NM_001377297	chr11	17387847	17388840	introns_1	0	0.95	14	20	4.8874e-10	2.03229e-08	0.95
NM_001111018	chr11	19351028	19832483	introns_2	0.925926	0.371429	27	35	2.30441e-06	4.10277e-05	-0.554497
NM_001142649	chr11	22262129	22262298	exons_14	0.714286	1	14	20	0.00500185	0.049131	0.285714
NM_002901	chr11	32091451	32097143	introns_1	0.133333	0.692308	15	13	0.00185074	0.0205525	0.558974
NM_001384648	chr11	45219570	45219757	exons_1	0.317073	0.869565	41	46	5.3649e-08	1.30544e-06	0.552492
NM_003654	chr11	45647689	45650965	exons_1	0.837209	0	43	62	7.65217e-23	2.8076e-20	-0.837209
NM_000741	chr11	46383791	46386586	exons_1	0	1	33	26	2.30461e-19	5.45873e-17	1
NM_006093	chr11	57376769	57376908	exons_1	0.833333	0	12	15	6.42353e-07	1.24945e-05	-0.833333
NM_001300773	chr11	61556104	61556207	exons_3	0.157895	0.695652	38	46	3.40883e-07	7.01717e-06	0.537757
NR_110189	chr11	61587493	61589493	promoters	1	0	17	18	3.31685e-12	2.72215e-10	-1
NM_004111	chr11	61795341	61797238	exons_2	0.733333	1	15	22	0.0048071	0.0473174	0.266667
NM_001363593	chr11	61962255	61965515	exons_1	0.962963	0.4	27	30	1.1689e-06	2.17204e-05	-0.562963
NM_002032	chr11	61965369	61965515	exons_3	0.962963	0.4	27	30	1.1689e-06	2.17204e-05	-0.562963
NM_006054	chr11	63681779	63749990	introns_1	0	0.85	14	20	3.8459e-08	9.60809e-07	0.85
NM_201429	chr11	63704908	63749990	introns_1	0	0.85	14	20	3.8459e-08	9.60809e-07	0.85
NM_201428	chr11	63721033	63749990	introns_1	0	0.85	14	20	3.8459e-08	9.60809e-07	0.85
NM_017490	chr11	63908877	63911020	exons_2	0.677419	0.0277778	62	72	1.05999e-17	2.02394e-15	-0.649642
NM_014067	chr11	64000344	64015251	introns_7	0.769231	0	13	13	5.65615e-06	9.37448e-05	-0.769231
NM_001382364	chr11	64223048	64223189	exons_4	0	0.916667	12	24	4.61404e-09	1.42943e-07	0.916667
NM_001370363	chr11	64240608	64242608	promoters	0.236111	0.0135135	72	74	8.86584e-06	0.000143138	-0.222598
NM_001370360	chr11	64240944	64242944	promoters	0.236111	0.0135135	72	74	8.86584e-06	0.000143138	-0.222598
NM_057092	chr11	64241115	64243115	promoters	0.236111	0.0135135	72	74	8.86584e-06	0.000143138	-0.222598
NM_001370360	chr11	64242357	64242558	exons_1	0.85	0.0588235	20	17	2.31422e-07	4.93208e-06	-0.791176
NM_057092	chr11	64242384	64242558	exons_1	0.85	0.0588235	20	17	2.31422e-07	4.93208e-06	-0.791176
NM_001370367	chr11	64242419	64242558	exons_1	0.85	0.0588235	20	17	2.31422e-07	4.93208e-06	-0.791176
NM_001317090	chr11	64297280	64297466	introns_4	0.0625	0.956522	16	23	1.12567e-09	4.16277e-08	0.894022
NR_133661	chr11	64297280	64297614	introns_1	0.0625	0.956522	16	23	1.12567e-09	4.16277e-08	0.894022
NM_032251	chr11	64353054	64353240	exons_14	0.315789	0.96	19	25	1.66517e-06	3.02511e-05	0.644211
NM_001098671	chr11	64742010	64742112	exons_1	0.923077	0	13	19	2.84215e-09	9.1852e-08	-0.923077
NM_001318398	chr11	64742033	64742793	introns_1	0.923077	0	13	19	2.84215e-09	9.1852e-08	-0.923077
NM_005609	chr11	64753879	64754025	exons_11	0.5	1	14	25	3.19212e-05	0.000471065	0.5
NM_001307990	chr11	64802214	64804214	promoters	0.333333	0	15	21	0.00163817	0.0183994	-0.333333
NM_001307990	chr11	64802563	64802653	exons_16	0.333333	0	15	21	0.00163817	0.0183994	-0.333333
NM_017525	chr11	64826671	64826794	exons_3	0.583333	0	12	24	1.19777e-05	0.000189777	-0.583333
NM_013265	chr11	65109705	65109923	exons_3	1	0.588235	17	17	0.00068123	0.00831518	-0.411765
NM_145719	chr11	65355793	65357611	exons_2	0.857143	0.1	14	20	3.38834e-06	5.93103e-05	-0.757143
NM_002419	chr11	65613018	65614221	exons_10	0.1875	0.8125	16	16	0.000241576	0.00315668	0.625
NM_002419	chr11	65613221	65615221	promoters	0.1875	0.8125	16	16	0.000241576	0.00315668	0.625
NM_153253	chr11	65639120	65641120	promoters	0.185185	0.925	27	40	1.28247e-10	6.79819e-09	0.739815
NM_153253	chr11	65640801	65641600	exons_2	0.106667	0.911111	75	90	1.83347e-28	1.22528e-25	0.804444
NM_006747	chr11	65640831	65641600	exons_1	0.106667	0.911111	75	90	1.83347e-28	1.22528e-25	0.804444
NM_138368	chr11	65773898	65780342	exons_1	0.925926	0.0666667	27	45	9.85284e-15	1.21294e-12	-0.859259
NR_037718	chr11	65867861	65868056	exons_1	1	0.2	12	20	8.0522e-07	1.53591e-05	-0.8
NM_130443	chr11	66482193	66482470	exons_1	0.705882	0.957746	51	71	8.4839e-05	0.00117506	0.251864
NM_005700	chr11	66482196	66482470	exons_1	0.705882	0.957746	51	71	8.4839e-05	0.00117506	0.251864
NR_024469	chr11	67321334	67387534	introns_2	0.860465	0.428571	43	70	2.25501e-06	4.02248e-05	-0.431894
NM_001256870	chr11	67352020	67352987	introns_1	0.857143	0.0697674	28	43	1.89577e-12	1.63473e-10	-0.787375
NM_021173	chr11	67352546	67354546	promoters	0.857143	0.0697674	28	43	1.89577e-12	1.63473e-10	-0.787375
NR_046413	chr11	67352596	67354596	promoters	0.857143	0.0697674	28	43	1.89577e-12	1.63473e-10	-0.787375
NR_046413	chr11	67352691	67352802	exons_1	0.857143	0.0697674	28	43	1.89577e-12	1.63473e-10	-0.787375
NM_004910	chr11	67493410	67493593	exons_3	1	0	14	15	2.33029e-10	1.13553e-08	-1
NM_004910	chr11	67493922	67494070	exons_5	0.926829	0	41	45	8.52261e-23	3.06683e-20	-0.926829
NM_001098515	chr11	69004394	69006261	exons_1	1	0.047619	14	21	2.86738e-10	1.3248e-08	-0.952381
NM_145015	chr11	69004398	69006261	exons_1	1	0.047619	14	21	2.86738e-10	1.3248e-08	-0.952381
NM_002007	chr11	69771023	69773485	exons_1	0	0.888889	12	18	7.63136e-08	1.79394e-06	0.888889
NM_001567	chr11	72235675	72235753	exons_24	0.611111	1	18	18	0.000730295	0.0088563	0.388889
NM_001040118	chr11	72693325	72693470	exons_2	0	0.952381	14	21	2.86738e-10	1.3248e-08	0.952381
NM_015424	chr11	74718833	74730806	introns_1	0.142857	0.785714	14	14	0.000377222	0.0047985	0.642857
NM_001378176	chr11	74843454	74844167	introns_1	0	0.9375	13	16	1.08275e-08	3.04667e-07	0.9375
NM_001378162	chr11	74843854	74843959	exons_1	0	0.9375	13	16	1.08275e-08	3.04667e-07	0.9375
NM_004626	chr11	76186325	76187239	exons_1	0.703704	0.987013	54	77	6.31457e-07	1.23338e-05	0.283309
NR_024042	chr11	76719498	76719865	exons_20	0.62069	0.952381	29	42	0.000307674	0.00397322	0.331691
NM_001098816	chr11	79069722	79070009	exons_30	0.958333	0.030303	24	33	8.08081e-15	1.00138e-12	-0.92803
NM_001156474	chr11	86422574	86423106	exons_1	0.214286	1	14	22	4.87054e-08	1.18823e-06	0.785714
NM_021827	chr11	86422574	86423109	exons_1	0.214286	1	14	22	4.87054e-08	1.18823e-06	0.785714
NM_001330345	chr11	94393619	94400860	introns_2	1	0.647059	14	17	0.00377736	0.0384978	-0.352941
NM_016540	chr11	94393619	94396398	introns_1	1	0.647059	14	17	0.00377736	0.0384978	-0.352941
NM_001301007	chr11	94831542	94850113	introns_4	0.9375	0.45	16	20	0.00100294	0.0118254	-0.4875
NM_001165	chr11	102321837	102325362	exons_2	0.933333	0.176471	15	17	4.48748e-06	7.5922e-05	-0.756863
NM_182962	chr11	102324461	102325362	exons_2	0.933333	0.176471	15	17	4.48748e-06	7.5922e-05	-0.756863
NM_001541	chr11	111911733	111913733	promoters	0.0123457	0.74	81	100	5.73168e-28	3.06432e-25	0.727654
NR_037651	chr11	111911735	111913735	promoters	0.0123457	0.74	81	100	5.73168e-28	3.06432e-25	0.727654
NM_001368245	chr11	111911923	111923702	introns_1	0.0123457	0.74	81	100	5.73168e-28	3.06432e-25	0.727654
NM_001885	chr11	111912161	111914161	promoters	0.0123457	0.74	81	100	5.73168e-28	3.06432e-25	0.727654
NM_001289807	chr11	111912213	111914213	promoters	0.0123457	0.74	81	100	5.73168e-28	3.06432e-25	0.727654
NR_037651	chr11	111912924	111918677	introns_1	0.0123457	0.74	81	100	5.73168e-28	3.06432e-25	0.727654
NM_001541	chr11	111913441	111914093	exons_1	0.0123457	0.74	81	100	5.73168e-28	3.06432e-25	0.727654
NM_001018011	chr11	114156435	114186951	introns_3	0.368421	0.967742	38	31	1.99184e-08	5.35508e-07	0.599321
NM_001354752	chr11	114156435	114242166	introns_1	0.368421	0.967742	38	31	1.99184e-08	5.35508e-07	0.599321
NR_135069	chr11	116639538	116652897	introns_1	0.266667	1	15	23	1.02287e-07	2.36296e-06	0.733333
NM_001077263	chr11	117928402	117930402	promoters	0.421053	1	19	16	2.57248e-05	0.000389138	0.578947
NM_001206790	chr11	117928453	117930453	promoters	0.421053	1	19	16	2.57248e-05	0.000389138	0.578947
NM_001206790	chr11	117929287	117929453	exons_1	0.421053	1	19	16	2.57248e-05	0.000389138	0.578947
NM_001286571	chr11	118203428	118203665	exons_3	0.230769	0.958333	13	24	1.91942e-06	3.45017e-05	0.727564
NM_001282144	chr11	119179693	119180288	exons_6	0.222222	0.954545	18	22	3.94774e-07	8.04686e-06	0.732323
NR_034160	chr11	119469976	119498549	introns_1	0.515152	0.97561	33	41	6.89385e-07	1.3332e-05	0.460458
NM_001198673	chr11	120329977	120333686	exons_1	0	1	12	13	4.01314e-09	1.25785e-07	1
NM_001198674	chr11	120330050	120330406	introns_1	0	1	12	13	4.01314e-09	1.25785e-07	1
NM_005422	chr11	121152881	121153080	exons_13	0.911111	0.239437	45	71	8.64708e-14	8.98912e-12	-0.671674
NM_001367419	chr11	123480894	123577366	introns_1	0.604651	0.923077	43	52	0.000144052	0.001942	0.318426
NM_001330396	chr11	123508915	123510915	promoters	0.0666667	1	15	18	8.51118e-10	3.30417e-08	0.933333
NM_022370	chr11	124869948	124870068	exons_4	0.785714	0.0909091	14	22	1.2149e-05	0.000192003	-0.694805
NM_005103	chr11	125481634	125489466	introns_8	0.357143	0.88	14	25	0.000677702	0.00828834	0.522857
NM_032531	chr11	126423358	126425023	exons_1	0.551724	0.975	29	40	6.40813e-06	0.000105927	0.423276
NM_001301097	chr11	126423501	126425023	exons_1	0.551724	0.975	29	40	6.40813e-06	0.000105927	0.423276
NR_120582	chr11	129616269	129618269	promoters	0.692308	0.0666667	13	15	0.000294952	0.00381948	-0.625641
NM_001367893	chr11	129944771	129945012	exons_7	0.9375	0	16	15	2.60138e-09	8.75486e-08	-0.9375
NM_021978	chr11	130188530	130188657	exons_3	0.357143	1	14	20	4.4757e-06	7.58599e-05	0.642857
NM_021978	chr11	130188869	130188939	exons_4	0.3125	0.954545	16	22	1.06727e-05	0.000170253	0.642045
NM_021978	chr11	130208410	130208684	exons_17	0.866667	0	15	15	6.28438e-08	1.51929e-06	-0.866667
NM_139055	chr11	130473047	130476645	exons_8	0.690476	1	42	44	4.40601e-06	7.54303e-05	0.309524
NM_001347927	chr11	130910371	130916279	introns_1	0.877551	0.183333	49	60	3.39084e-14	3.79936e-12	-0.694218
NM_001347925	chr11	130911772	130916279	introns_1	0.877551	0.183333	49	60	3.39084e-14	3.79936e-12	-0.694218
NM_001347919	chr11	130914266	130916479	exons_1	0.877551	0.183333	49	60	3.39084e-14	3.79936e-12	-0.694218
NM_001347922	chr11	130914750	130916279	introns_1	0.877551	0.183333	49	60	3.39084e-14	3.79936e-12	-0.694218
NR_147848	chr11	131370889	131911563	introns_1	0.928571	0.58	28	50	0.000486125	0.00611316	-0.348571
NM_001352007	chr11	131661049	131911563	introns_1	0.866667	0.2	15	25	1.9365e-05	0.000297502	-0.666667
NM_017417	chr12	4761144	4763252	introns_7	1	0.08	13	25	1.15503e-09	4.23782e-08	-0.92
NM_002824	chr12	6766751	6769602	introns_1	0.857143	0	14	14	2.30405e-07	4.93208e-06	-0.857143
NM_001733	chr12	7091445	7093445	promoters	0	0.916667	12	24	4.61404e-09	1.42943e-07	0.916667
NM_005889	chr12	7652438	7652835	exons_3	0	0.611111	17	18	9.97011e-06	0.000159629	0.611111
NR_147945	chr12	8749862	8750092	exons_1	0.5	0.95	14	20	0.00179157	0.0199191	0.45
NM_001297749	chr12	10097985	10099985	promoters	0.571429	1	14	16	0.000960232	0.0113649	0.428571
NM_001297749	chr12	10098808	10098985	exons_1	0.571429	1	14	16	0.000960232	0.0113649	0.428571
NM_001001395	chr12	16560539	16600654	introns_2	1	0.0833333	15	24	3.03096e-10	1.38668e-08	-0.916667
NM_001243613	chr12	16560539	16594136	introns_1	1	0.0833333	15	24	3.03096e-10	1.38668e-08	-0.916667
NR_045014	chr12	16560539	16600713	introns_1	1	0.0833333	15	24	3.03096e-10	1.38668e-08	-0.916667
NM_004982	chr12	21764955	21766623	exons_1	0	0.954545	16	22	3.08624e-11	2.02631e-09	0.954545
NM_001261414	chr12	23896025	24213342	introns_1	1	0	15	14	2.33029e-10	1.13553e-08	-1
NM_001261415	chr12	23896025	23950868	introns_1	1	0	15	14	2.33029e-10	1.13553e-08	-1
NM_152989	chr12	23896025	24277215	introns_1	0.962963	0.5	27	30	2.82945e-05	0.000423218	-0.462963
NM_001261415	chr12	23950032	23952032	promoters	1	0	15	14	2.33029e-10	1.13553e-08	-1
NM_030762	chr12	26120030	26123168	exons_1	0.666667	0.142857	15	14	0.00308338	0.0323954	-0.52381
NM_001378439	chr12	39370262	39442926	introns_11	0.333333	1	15	16	8.20224e-06	0.000132999	0.666667
NR_110042	chr12	42634402	42643316	introns_3	0	0.833333	15	18	6.34717e-08	1.52463e-06	0.833333
NM_001347839	chr12	45731315	45811417	introns_3	1	0.2	14	15	8.14152e-07	1.54507e-05	-0.8
NM_001077484	chr12	46229564	46229639	exons_13	0	1	17	22	2.68973e-13	2.63509e-11	1
NM_003394	chr12	48965340	48966553	exons_1	0.019802	0.963855	101	83	4.96972e-47	2.32484e-43	0.944053
NM_003482	chr12	49039435	49039617	exons_23	0.384615	1	13	22	6.60323e-06	0.000108959	0.615385
NM_021044	chr12	49086656	49090484	exons_1	0.4375	0	16	18	0.000376667	0.00479468	-0.4375
NM_001368048	chr12	49791152	49792051	exons_1	1	0.782051	40	78	8.21889e-05	0.00114429	-0.217949
NM_001652	chr12	49971946	49973946	promoters	0	0.957447	25	47	7.14427e-19	1.61064e-16	0.957447
NM_001652	chr12	49972947	49973575	exons_1	0	0.957447	25	47	7.14427e-19	1.61064e-16	0.957447
NM_173602	chr12	50732366	50732536	exons_32	0.642857	1	14	18	0.00206781	0.0226805	0.357143
NM_001013690	chr12	51822425	51831756	introns_1	0.461538	0	13	17	0.000509842	0.00637712	-0.461538
NM_001384996	chr12	51822425	51840121	introns_1	0.461538	0	13	17	0.000509842	0.00637712	-0.461538
NM_001384995	chr12	51822425	51848539	introns_1	0.230769	0	26	32	0.00120002	0.0139486	-0.230769
NM_004302	chr12	51983999	51984166	exons_1	0.384615	1	13	15	5.76034e-05	0.000817811	0.615385
NM_033448	chr12	52543909	52544743	exons_1	0	1	15	23	9.32022e-13	8.89796e-11	1
NM_033448	chr12	52552145	52554145	promoters	0	1	14	15	2.33029e-10	1.13553e-08	1
NM_033448	chr12	52552637	52553145	exons_9	0	1	14	15	2.33029e-10	1.13553e-08	1
NM_001164691	chr12	53429626	53431176	introns_1	0.111111	0.866667	18	15	4.27721e-06	7.34942e-05	0.755556
NM_001164690	chr12	53429831	53429978	exons_1	0.111111	0.866667	18	15	4.27721e-06	7.34942e-05	0.755556
NR_120486	chr12	54407507	54409549	introns_1	0.0588235	0.944444	17	18	8.48271e-09	2.43292e-07	0.885621
NR_120487	chr12	54407507	54427856	introns_1	0.0588235	0.944444	17	18	8.48271e-09	2.43292e-07	0.885621
NM_002205	chr12	54409232	54409352	exons_6	0.0588235	0.944444	17	18	8.48271e-09	2.43292e-07	0.885621
NM_001272101	chr12	55838735	55840666	introns_1	0.307692	1	13	14	1.86396e-05	0.000288013	0.692308
NM_002429	chr12	55839496	55839741	exons_1	0.307692	1	13	14	1.86396e-05	0.000288013	0.692308
NM_001982	chr12	56101529	56103505	exons_26	0.0882353	0.934783	34	46	3.28732e-16	4.90173e-14	0.846547
NM_005538	chr12	57433783	57435783	promoters	0.586207	0.948718	29	39	0.00017937	0.00239228	0.362511
NM_005538	chr12	57434784	57435199	exons_1	0.586207	0.948718	29	39	0.00017937	0.00239228	0.362511
NM_001347933	chr12	57614016	57614119	exons_4	0.842105	0.318182	19	22	0.000495904	0.00621524	-0.523923
NR_027032	chr12	57726965	57728356	exons_1	0.4375	0.0526316	16	19	0.00504634	0.0494383	-0.384868
NM_001122772	chr12	57727937	57728085	exons_4	0.4375	0.0526316	16	19	0.00504634	0.0494383	-0.384868
NM_014770	chr12	57735428	57741911	introns_1	0.116883	0.696203	77	79	1.88706e-14	2.20692e-12	0.579319
NM_007235	chr12	64431538	64431823	exons_18	0.928571	0.333333	14	24	0.000140178	0.00189251	-0.595238
NM_013254	chr12	64482022	64484302	introns_8	0.666667	1	12	19	0.00342627	0.035539	0.333333
NR_103861	chr12	67520193	67549122	introns_1	0.153846	0.7	13	20	0.00146634	0.0166696	0.546154
NM_139137	chr12	75050390	75051317	exons_2	0	0.866667	12	15	4.17291e-07	8.36551e-06	0.866667
NM_001024383	chr12	77968519	77968702	exons_5	0.230769	0.954545	13	22	3.74164e-06	6.50565e-05	0.723776
NM_001024383	chr12	78176460	78177140	introns_26	0	0.975	27	40	1.57196e-19	3.77109e-17	0.975
NM_005639	chr12	79217686	79285786	introns_2	0	0.894737	12	19	4.55498e-08	1.12148e-06	0.894737
NM_024560	chr12	81253495	81253670	exons_8	0	0.944444	15	18	7.09888e-10	2.83229e-08	0.944444
NR_144319	chr12	92421174	92432909	introns_1	1	0.0588235	13	17	5.95602e-09	1.78264e-07	-0.941176
NR_027933	chr12	92421836	92429033	introns_1	1	0.0588235	13	17	5.95602e-09	1.78264e-07	-0.941176
NR_164161	chr12	92422637	92428094	introns_1	1	0.0588235	13	17	5.95602e-09	1.78264e-07	-0.941176
NR_027932	chr12	92425935	92429033	introns_1	1	0.0588235	13	17	5.95602e-09	1.78264e-07	-0.941176
NR_164161	chr12	92427148	92429148	promoters	1	0.0588235	13	17	5.95602e-09	1.78264e-07	-0.941176
NM_003877	chr12	93574722	93576745	exons_2	1	0.190476	13	21	2.39638e-07	5.07826e-06	-0.809524
NM_032147	chr12	95532829	95534326	exons_2	0	0.92	12	25	3.06342e-09	9.84927e-08	0.92
NM_001352201	chr12	98801126	99053156	introns_1	0.0714286	0.909091	14	22	1.04272e-07	2.39993e-06	0.837662
NM_001204066	chr12	98807919	99053156	introns_1	0.0714286	0.909091	14	22	1.04272e-07	2.39993e-06	0.837662
NM_001352185	chr12	98832137	99053156	introns_2	0.0714286	0.909091	14	22	1.04272e-07	2.39993e-06	0.837662
NM_001352185	chr12	99825390	99984103	introns_8	0.0714286	0.928571	14	28	8.60751e-09	2.46275e-07	0.857143
NR_040246	chr12	106507811	106774689	introns_1	0.671875	0.984375	64	64	3.14453e-07	6.53782e-06	0.3125
NM_001347943	chr12	107543935	107544139	exons_2	0	0.8	16	15	2.82076e-07	5.89743e-06	0.8
NM_001093	chr12	109197154	109199401	introns_17	0	0.95	16	20	9.83082e-11	5.50761e-09	0.95
NM_001093	chr12	109201567	109201701	exons_19	0.214286	1	14	23	3.36462e-08	8.49647e-07	0.785714
NM_015267	chr12	111034241	111214199	introns_1	0.407407	0.886364	27	44	1.63508e-05	0.000254116	0.478956
NM_001370598	chr12	111100118	111214199	introns_1	0	0.8125	14	16	4.1756e-07	8.36551e-06	0.8125
NM_001177997	chr12	111360651	111363463	exons_1	0.47619	0.964912	42	57	4.95699e-09	1.52809e-07	0.488722
NM_001109662	chr12	112183267	112184186	introns_14	0.933333	0	15	13	2.02719e-08	5.39583e-07	-0.933333
NM_001109662	chr12	112184187	112185493	exons_14	0.923077	0	13	12	1.51791e-07	3.38535e-06	-0.923077
NM_004416	chr12	113058452	113077423	introns_2	0	0.952381	12	21	1.7708e-09	6.20509e-08	0.952381
NM_001144872	chr12	113148857	113150857	promoters	0.928571	0	14	26	4.8382e-11	2.9961e-09	-0.928571
NM_001144872	chr12	113149858	113149913	exons_1	0.928571	0	14	26	4.8382e-11	2.9961e-09	-0.928571
NM_001146699	chr12	113818187	113823208	introns_1	0.65625	0.95	32	40	0.000942555	0.0112195	0.29375
NM_001146698	chr12	113822057	113822646	exons_1	0.65625	0.95	32	40	0.000942555	0.0112195	0.29375
NM_016196	chr12	113822057	113823321	exons_1	0.65625	0.95	32	40	0.000942555	0.0112195	0.29375
NM_016569	chr12	114670255	114672302	exons_1	0.612903	0.0227273	31	44	1.91233e-09	6.67603e-08	-0.590176
NM_153348	chr12	116985403	116988662	introns_1	0.923077	0.05	13	20	6.3289e-08	1.52415e-06	-0.873077
NR_103809	chr12	116985654	116987337	exons_1	0.923077	0.05	13	20	6.3289e-08	1.52415e-06	-0.873077
NR_103809	chr12	116986337	116988337	promoters	0.923077	0.05	13	20	6.3289e-08	1.52415e-06	-0.873077
NM_016281	chr12	118181608	118189806	introns_7	1	0.631579	13	19	0.00333885	0.0347478	-0.368421
NM_000928	chr12	120325861	120326020	exons_3	0	0.296296	33	27	0.000155411	0.00209062	0.296296
NM_003959	chr12	122856727	122857020	introns_17	0.466667	0.95	15	20	0.000802694	0.00968408	0.483333
NM_001136103	chr12	128414732	128415620	exons_1	0.230769	0.9	13	20	5.65992e-05	0.000805388	0.669231
NM_001351230	chr12	130422562	130428178	introns_7	0	0.877551	45	49	4.73654e-22	1.45295e-19	0.877551
NM_001351230	chr12	130506648	130506770	exons_2	0.923077	0	13	17	7.77825e-09	2.25304e-07	-0.923077
NM_138575	chr12	132717987	132718120	exons_1	0	0.95	13	20	1.15339e-09	4.23782e-08	0.95
NM_001170544	chr12	132717990	132718120	exons_1	0	0.95	13	20	1.15339e-09	4.23782e-08	0.95
NM_001363647	chr13	20489497	20512442	introns_1	1	0.470588	12	17	0.000425744	0.00539372	-0.529412
NR_134934	chr13	20731841	20732121	exons_2	0.923077	0.238095	13	21	3.67869e-05	0.000537778	-0.684982
NM_001330072	chr13	35839177	35854498	introns_10	0	0.931034	30	29	2.98712e-16	4.54431e-14	0.931034
NM_001195430	chr13	35845900	35850776	exons_1	0	0.931034	30	29	2.98712e-16	4.54431e-14	0.931034
NM_001330072	chr13	35854594	35871223	introns_1	0	0.95	17	20	4.63562e-11	2.9404e-09	0.95
NM_001195416	chr13	35854667	35856667	promoters	0	0.95	17	20	4.63562e-11	2.9404e-09	0.95
NM_001195415	chr13	35854861	35856861	promoters	0	0.95	17	20	4.63562e-11	2.9404e-09	0.95
NM_001195415	chr13	35855510	35855861	exons_1	0	0.95	17	20	4.63562e-11	2.9404e-09	0.95
NM_001330543	chr13	42926430	42953947	introns_2	0.714286	1	14	26	0.00234842	0.0253277	0.285714
NR_038433	chr13	44805031	44809408	introns_2	0.166667	1	12	19	1.10993e-07	2.53901e-06	0.833333
NM_032949	chr13	52842890	52844933	exons_1	0.353846	0.0574713	65	87	2.12193e-06	3.79957e-05	-0.296375
NM_001160706	chr13	77556714	77559803	introns_3	0	0.9375	14	16	5.21499e-09	1.58671e-07	0.9375
NR_047001	chr13	78607211	78615674	introns_2	0.64	0.21875	25	32	0.00113632	0.0132479	-0.42125
NM_004466	chr13	92144990	92866281	introns_7	0	0.533333	45	60	1.06412e-11	7.90155e-10	0.533333
NR_120417	chr13	94707486	94709486	promoters	0	0.318182	17	22	0.00243827	0.0262212	0.318182
NM_005845	chr13	95062860	95071661	introns_6	0.916667	0.434783	12	23	0.00312261	0.0326974	-0.481884
NR_051966	chr13	96941281	96941799	exons_1	0	1	17	23	1.51668e-13	1.52582e-11	1
NM_001350751	chr13	101107487	101107609	exons_22	0.307692	0.833333	13	24	0.00133215	0.0152842	0.525641
NM_001350751	chr13	101143080	101143221	exons_2	1	0.55	14	20	0.000600919	0.00742204	-0.45
NM_001372057	chr13	106489746	106493428	exons_1	0	1	45	57	2.67954e-32	3.13372e-29	1
NM_003749	chr13	109782042	109786583	exons_2	0.555556	0.125	27	32	0.000321435	0.00413608	-0.430556
NM_001846	chr13	110357472	110357552	exons_1	0.727273	1	22	22	0.00233051	0.0251869	0.272727
NM_000820	chr13	113834673	113835512	introns_1	0.947368	0.16	19	25	2.354e-08	6.20394e-07	-0.787368
NR_044995	chr13	113834765	113838076	introns_1	0.947368	0.16	19	25	2.354e-08	6.20394e-07	-0.787368
NM_001278530	chr14	21073932	21074991	exons_1	0	0.980392	51	51	1.90651e-30	1.87761e-27	0.980392
NM_018071	chr14	21073932	21075180	exons_1	0	0.980392	51	51	1.90651e-30	1.87761e-27	0.980392
NM_020366	chr14	21300966	21301237	exons_4	0.533333	0	15	20	3.93931e-05	0.000571857	-0.533333
NM_001364564	chr14	21521081	21525654	exons_1	0	0.944444	15	18	7.09888e-10	2.83229e-08	0.944444
NR_111967	chr14	21522245	21525336	introns_1	0	0.944444	15	18	7.09888e-10	2.83229e-08	0.944444
NM_001291446	chr14	21522833	21524931	exons_1	0	0.944444	15	18	7.09888e-10	2.83229e-08	0.944444
NM_005015	chr14	22767958	22768171	exons_3	1	0.285714	15	21	1.08303e-06	2.01849e-05	-0.714286
NM_032876	chr14	22971177	22973568	exons_1	0.3125	1	16	20	7.66161e-07	1.46589e-05	0.6875
NM_001354640	chr14	23101292	23101564	exons_4	0.583333	1	12	20	0.000720002	0.00875987	0.416667
NM_000257	chr14	23433084	23433227	exons_27	0.909091	0.595238	33	42	0.00141197	0.0161201	-0.313853
NR_046051	chr14	23514417	23558694	introns_2	0.575472	0.815385	106	130	5.33317e-05	0.000763536	0.239913
NM_033400	chr14	23520857	23522941	exons_1	0.037037	0.9375	27	32	2.46366e-14	2.84567e-12	0.900463
NM_004563	chr14	24098203	24098387	exons_2	0.615385	1	26	48	9.80307e-07	1.84542e-05	0.384615
NM_017999	chr14	24150061	24150448	exons_4	0.642857	1	14	19	0.00172391	0.019224	0.357143
NM_006871	chr14	24336025	24336395	exons_1	0.1875	0.857143	16	21	2.27049e-05	0.000346538	0.669643
NR_125758	chr14	28741960	28762331	introns_5	0.928571	0	14	20	6.9702e-10	2.80487e-08	-0.928571
NM_015473	chr14	31318293	31321498	introns_11	0.153846	1	13	18	6.65783e-08	1.59311e-06	0.846154
NM_001164749	chr14	33793897	33794044	exons_4	0.846154	0.346154	13	26	0.00224731	0.0244628	-0.5
NM_020529	chr14	35402860	35403149	introns_3	1	0.185185	16	27	6.38903e-09	1.87974e-07	-0.814815
NM_001310135	chr14	37622050	37623003	exons_3	0.333333	0	15	15	0.00484007	0.0476169	-0.333333
NM_001330106	chr14	41888011	41898916	introns_2	0.357143	0	14	15	0.00372545	0.0383236	-0.357143
NM_152447	chr14	41891250	41891962	exons_1	0.357143	0	14	15	0.00372545	0.0383236	-0.357143
NR_144388	chr14	41891250	41892285	exons_1	0.357143	0	14	15	0.00372545	0.0383236	-0.357143
NR_131171	chr14	50052905	50089120	introns_7	0	1	14	24	1.5247e-12	1.35858e-10	1
NR_145423	chr14	51304841	51328129	introns_1	0.5	0.944444	14	18	0.00291935	0.0308976	0.444444
NM_021255	chr14	56296600	56301524	exons_6	0.333333	0.958333	12	24	3.94444e-05	0.000572157	0.625
NM_001308147	chr14	64742982	64750249	exons_17	0.967742	0.625	31	40	0.00018178	0.0024227	-0.342742
NM_001024858	chr14	64746283	64749473	exons_1	1	0.117647	18	17	2.56573e-09	8.65044e-08	-0.882353
NM_001168368	chr14	69260468	69320710	introns_1	0.391304	0.75	46	52	0.000284187	0.00368517	0.358696
NM_001280542	chr14	72629737	72674239	introns_3	0.307692	0.952381	13	21	3.53636e-05	0.000518186	0.644689
NM_001365906	chr14	73251664	73251836	exons_2	0	0.888889	18	18	1.24137e-09	4.53682e-08	0.888889
NM_001220484	chr14	73478843	73493065	introns_1	0.5625	0	16	21	1.22471e-05	0.000193227	-0.5625
NM_024644	chr14	73490933	73493394	exons_1	0.5625	0	16	21	1.22471e-05	0.000193227	-0.5625
NM_001353598	chr14	74292287	74292376	exons_3	0.965517	0.703704	29	54	0.00171384	0.019123	-0.261814
NM_018228	chr14	74356783	74360008	exons_2	0	0.925	71	80	3.99051e-38	6.22254e-35	0.925
NM_006399	chr14	75546462	75546991	exons_3	0.846154	0.108108	26	37	8.11139e-10	3.20212e-08	-0.738046
NR_110314	chr14	76153353	76155353	promoters	0.8	0.413793	25	29	0.00328673	0.0342435	-0.386207
NM_017926	chr14	76154354	76155025	exons_2	0.8	0.413793	25	29	0.00328673	0.0342435	-0.386207
NR_110554	chr14	77059729	77066070	introns_2	0.5	1	20	14	0.000242623	0.00316815	0.5
NM_020431	chr14	77225462	77231587	introns_6	0.764706	1	17	26	0.00451327	0.045307	0.235294
NM_007039	chr14	88478920	88480352	exons_7	0.9	0	50	57	2.03843e-26	9.5358e-24	-0.9
NM_001080414	chr14	91303701	91303978	exons_11	1	0.0416667	16	24	1.04912e-11	7.82119e-10	-0.958333
NR_003002	chr14	95532629	95534629	promoters	0.276596	0	47	52	3.42102e-06	5.98263e-05	-0.276596
NR_003138	chr14	95532912	95534872	exons_1	0.237288	0	59	65	1.82181e-06	3.28101e-05	-0.237288
NR_001459	chr14	95533062	95533692	introns_1	0.382353	0	34	39	1.48821e-06	2.74359e-05	-0.382353
NR_003002	chr14	95533355	95533629	exons_1	0.382353	0	34	39	1.48821e-06	2.74359e-05	-0.382353
NM_001350892	chr14	96408847	96408941	exons_4	0.967742	0.589744	31	39	6.4302e-05	0.00090809	-0.377998
NM_001385092	chr14	100539298	100540495	introns_1	0	0.565217	13	23	7.82712e-05	0.00109055	0.565217
NM_001385095	chr14	100539298	100543857	introns_1	0	0.565217	13	23	7.82712e-05	0.00109055	0.565217
NM_001385100	chr14	100539316	100543857	introns_1	0	0.565217	13	23	7.82712e-05	0.00109055	0.565217
NM_020836	chr14	100539316	100540495	introns_1	0	0.565217	13	23	7.82712e-05	0.00109055	0.565217
NM_152326	chr14	102501768	102507942	exons_1	0.9375	0	16	19	2.15344e-10	1.09201e-08	-0.9375
NM_001198953	chr14	103727915	103728907	introns_3	0.866667	0.333333	15	15	0.00204908	0.0225544	-0.533333
NM_001370342	chr14	104799553	104801553	promoters	0.769231	0.1875	13	16	0.00125753	0.0145253	-0.581731
NM_015005	chr14	104864267	104866267	promoters	0.275	0	40	29	0.00024008	0.00314152	-0.275
NR_162135	chr14	104864313	104866313	promoters	0.275	0	40	29	0.00024008	0.00314152	-0.275
NM_024490	chr15	25713674	25714241	exons_12	0.941176	0.3125	17	16	7.11274e-05	0.0010007	-0.628676
NM_001379685	chr15	29101785	29105378	introns_4	0.615385	0	13	16	4.06904e-05	0.000588862	-0.615385
NR_120329	chr15	34777432	34810495	introns_2	0.974026	0.139785	77	93	1.15554e-32	1.44149e-29	-0.834241
NM_005159	chr15	34793570	34794679	introns_5	0.933333	0	15	26	1.69376e-11	1.1782e-09	-0.933333
NM_005159	chr15	34794549	34796549	promoters	0.966102	0	59	78	1.51599e-38	3.15191e-35	-0.966102
NM_005159	chr15	34794680	34794830	exons_6	0.977273	0	44	52	1.79848e-28	1.22528e-25	-0.977273
NR_147201	chr15	38069941	38071829	introns_1	0.26087	1	23	12	2.60248e-06	4.62027e-05	0.73913
NM_170697	chr15	58013023	58015023	promoters	0.34375	0.974359	32	39	9.56532e-10	3.69044e-08	0.630609
NM_003888	chr15	58013858	58013998	exons_5	0.34375	0.974359	32	39	9.56532e-10	3.69044e-08	0.630609
NM_170697	chr15	58013858	58014023	exons_1	0.34375	0.974359	32	39	9.56532e-10	3.69044e-08	0.630609
NM_001018007	chr15	63043832	63056984	introns_1	0.642857	0.0666667	14	15	0.000603325	0.00742236	-0.57619
NM_001365777	chr15	63044153	63056984	introns_1	0.642857	0.0666667	14	15	0.000603325	0.00742236	-0.57619
NR_147233	chr15	63048387	63050387	promoters	0.642857	0.0666667	14	15	0.000603325	0.00742236	-0.57619
NM_001365781	chr15	63048708	63056984	introns_1	0.642857	0.0666667	14	15	0.000603325	0.00742236	-0.57619
NM_024798	chr15	64153340	64153651	introns_1	0.368421	0	19	16	0.0015485	0.0174868	-0.368421
NR_073534	chr15	64153387	64153651	introns_1	0.368421	0	19	16	0.0015485	0.0174868	-0.368421
NM_003613	chr15	65194760	65199099	exons_1	0.65625	0.926829	32	41	0.00315445	0.0329939	0.270579
NM_024817	chr15	71777232	71783383	exons_10	0.517241	0.928571	29	28	0.000296211	0.00383312	0.41133
NM_005477	chr15	73319859	73323949	exons_1	0.722222	1	18	24	0.00217979	0.0238388	0.277778
NR_040069	chr15	73920039	73928064	introns_1	0.769231	0	13	19	3.97956e-07	8.06777e-06	-0.769231
NR_040070	chr15	73920039	73927776	introns_1	0.769231	0	13	19	3.97956e-07	8.06777e-06	-0.769231
NR_040067	chr15	73925270	73925505	exons_1	0.769231	0	13	19	3.97956e-07	8.06777e-06	-0.769231
NM_005576	chr15	73925461	73927461	promoters	0.769231	0	13	19	3.97956e-07	8.06777e-06	-0.769231
NM_003992	chr15	74620226	74622119	introns_2	1	0.555556	16	18	0.000436331	0.00552037	-0.444444
NM_003978	chr15	77025605	77027851	introns_4	0.96	0.590909	25	22	0.00120029	0.0139486	-0.369091
NM_004378	chr15	78341222	78343498	introns_2	0.615385	0.0625	13	16	0.000854362	0.0102611	-0.552885
NM_181877	chr15	84620602	84623716	exons_1	0.0833333	0.954545	12	22	6.77193e-08	1.61628e-06	0.871212
NM_006738	chr15	85578930	85582107	exons_7	0.117647	0.933333	17	15	6.70412e-07	1.30132e-05	0.815686
NM_000326	chr15	89215060	89215238	exons_4	0.588235	1	17	14	0.00149638	0.0169595	0.411765
NM_000326	chr15	89217120	89217324	exons_5	1	0.108108	24	37	1.74046e-14	2.04827e-12	-0.891892
NM_001126131	chr15	89333096	89333913	exons_7	0.666667	0.0952381	12	21	0.000531991	0.00661876	-0.571429
NM_001004309	chr15	90351283	90353283	promoters	0.4375	0	16	21	0.000186416	0.00248094	-0.4375
NM_001004309	chr15	90352412	90354641	introns_1	0.4375	0	16	21	0.000186416	0.00248094	-0.4375
NM_002005	chr15	90893291	90893414	exons_6	0.642857	1	14	16	0.00303803	0.031994	0.357143
NM_001017919	chr15	90956612	90956900	exons_1	0.368421	0	38	28	1.9939e-05	0.000305567	-0.368421
NM_001166288	chr15	93035271	93045705	exons_1	0.545455	0.894737	33	38	0.000721035	0.00876673	0.349282
NM_001166289	chr15	93043406	93045705	exons_1	0.0769231	0.952381	13	21	4.01475e-08	1.00032e-06	0.875458
NM_001145157	chr15	96332764	96334764	promoters	0.393939	0	66	61	2.24016e-10	1.12127e-08	-0.393939
NM_001145155	chr15	96334076	96334603	exons_1	0.393939	0	66	61	2.24016e-10	1.12127e-08	-0.393939
NM_001291858	chr15	98649676	98707561	introns_1	0.866667	0	15	13	2.15033e-07	4.65706e-06	-0.866667
NM_014918	chr15	101178981	101235081	introns_1	0.741935	0.977273	31	44	0.00149087	0.0169382	0.235337
NM_002570	chr15	101443661	101489373	introns_9	0.78125	1	32	42	0.0003638	0.0046372	0.21875
NM_032259	chr16	685257	685597	exons_3	0.833333	0	48	56	1.60986e-22	5.19376e-20	-0.833333
NM_032259	chr16	685679	685783	exons_4	0.916667	0.0769231	12	26	1.31899e-07	2.96289e-06	-0.839744
NM_014587	chr16	984701	986979	exons_3	0.0652174	0.978261	46	46	1.44232e-22	4.99789e-20	0.913043
NM_001040439	chr16	1729138	1729208	exons_3	1	0.130435	18	23	4.23392e-10	1.82546e-08	-0.869565
NM_001040439	chr16	1764301	1764459	exons_8	1	0.0769231	14	13	4.22135e-08	1.04484e-06	-0.923077
NM_001324081	chr16	1780822	1782822	promoters	0.648649	0.0512821	37	39	5.80726e-09	1.75834e-07	-0.597367
NM_001324081	chr16	1781358	1781495	exons_6	0.648649	0.0512821	37	39	5.80726e-09	1.75834e-07	-0.597367
NM_006181	chr16	2472701	2472889	exons_2	0.25	0.857143	20	21	4.84324e-05	0.000694458	0.607143
NM_020982	chr16	3011922	3013922	promoters	0.263158	1	19	22	2.94501e-08	7.622e-07	0.736842
NM_020982	chr16	3012923	3014505	exons_1	0.263158	1	19	22	2.94501e-08	7.622e-07	0.736842
NM_001116	chr16	4113750	4115485	exons_10	0.774194	0.0416667	62	96	1.06463e-23	4.2386e-21	-0.732527
NM_001308117	chr16	6317058	6654602	introns_1	1	0.583333	15	24	0.000591776	0.00731877	-0.416667
NR_110736	chr16	8552208	8589212	introns_1	0.666667	0	15	13	3.02358e-05	0.000447958	-0.666667
NM_001134408	chr16	9768851	9769089	exons_2	1	0.12	14	25	3.17014e-09	1.01575e-07	-0.88
NR_104444	chr16	10877383	10895281	introns_1	0.857143	0	14	14	2.30405e-07	4.93208e-06	-0.857143
NM_001379334	chr16	10879043	10895281	introns_1	0.857143	0	14	14	2.30405e-07	4.93208e-06	-0.857143
NM_001324268	chr16	19030370	19037873	introns_1	0.923077	0.4	13	20	0.0013447	0.0153991	-0.523077
NM_001160364	chr16	19035676	19035823	exons_1	0.923077	0.4	13	20	0.0013447	0.0153991	-0.523077
NR_136733	chr16	19035676	19035810	exons_1	0.923077	0.4	13	20	0.0013447	0.0153991	-0.523077
NR_028028	chr16	19112963	19114963	promoters	0.4375	0	16	24	9.8353e-05	0.00135322	-0.4375
NM_006043	chr16	22914944	22916338	exons_2	0.176471	0.64	17	25	0.00225685	0.0245524	0.463529
NM_033266	chr16	23695200	23695389	exons_8	1	0.0555556	14	18	1.51713e-09	5.44886e-08	-0.944444
NM_002738	chr16	23837407	23988507	introns_2	1	0	12	19	1.25284e-10	6.65999e-09	-1
NM_001042539	chr16	29808742	29809539	introns_1	1	0.0416667	15	24	2.55871e-11	1.73473e-09	-0.958333
NM_002383	chr16	29808742	29810076	introns_1	1	0.0416667	15	24	2.55871e-11	1.73473e-09	-0.958333
NM_001145524	chr16	30095213	30097213	promoters	0.535714	0.0294118	28	34	1.5295e-06	2.79493e-05	-0.506303
NM_001145524	chr16	30095252	30095434	exons_4	0.535714	0.0294118	28	34	1.5295e-06	2.79493e-05	-0.506303
NM_031477	chr16	30095252	30096213	exons_1	0.535714	0.0294118	28	34	1.5295e-06	2.79493e-05	-0.506303
NM_001193333	chr16	30187382	30187501	exons_6	0.177778	1	45	58	7.11302e-22	2.13838e-19	0.822222
NR_002454	chr16	30187683	30189683	promoters	0	0.958333	14	24	6.48496e-11	3.84008e-09	0.958333
NM_001193333	chr16	30188361	30188576	exons_10	0	0.958333	14	24	6.48496e-11	3.84008e-09	0.958333
NM_015527	chr16	30357102	30358573	exons_1	1	0.384615	14	13	8.28462e-05	0.00115001	-0.615385
NM_001114380	chr16	30506715	30506856	exons_3	0.866667	0.291667	15	24	0.000267536	0.00347648	-0.575
NM_024671	chr16	30524005	30526051	exons_1	0.333333	0.056338	60	71	2.71634e-05	0.000408916	-0.276995
NM_001330533	chr16	49487525	49491304	exons_1	0	0.983607	42	61	4.61431e-30	4.11157e-27	0.983607
NM_001271620	chr16	49487531	49491304	exons_1	0	0.983607	42	61	4.61431e-30	4.11157e-27	0.983607
NM_015069	chr16	49789547	49822669	introns_1	0.133333	0.961538	15	26	1.26351e-08	3.50265e-07	0.828205
NM_001271620	chr16	49789547	49857740	introns_2	0.103448	0.581395	29	43	1.72484e-05	0.0002674	0.477947
NM_001379286	chr16	49789547	49855734	introns_1	0.103448	0.581395	29	43	1.72484e-05	0.0002674	0.477947
NR_134922	chr16	54369458	54371458	promoters	1	0	13	16	2.6845e-10	1.27471e-08	-1
NR_134923	chr16	54369699	54371699	promoters	1	0	13	16	2.6845e-10	1.27471e-08	-1
NR_134923	chr16	54370566	54370699	exons_1	1	0	13	16	2.6845e-10	1.27471e-08	-1
NM_024335	chr16	55326336	55326593	exons_2	1	0.375	16	16	1.62963e-05	0.00025348	-0.625
NM_024335	chr16	55330298	55330756	exons_6	0.923077	0	13	22	7.24715e-10	2.87307e-08	-0.923077
NM_138736	chr16	56328631	56328791	exons_2	0.0666667	1	15	26	1.69376e-11	1.1782e-09	0.933333
NM_001797	chr16	64943753	64948099	exons_1	0	0.939394	33	33	2.6117e-18	5.50702e-16	0.939394
NM_181521	chr16	66695743	66697743	promoters	1	0	16	17	1.36604e-11	9.83125e-10	-1
NM_001128850	chr16	66921679	66922353	exons_1	0.95122	0.309859	41	71	1.19644e-12	1.09209e-10	-0.64136
NM_004165	chr16	66921685	66922353	exons_1	0.95122	0.309859	41	71	1.19644e-12	1.09209e-10	-0.64136
NM_178516	chr16	67186237	67186347	exons_6	0.966667	0.659091	30	44	0.000522193	0.00650551	-0.307576
NM_001323975	chr16	67270738	67272191	exons_2	0.692308	1	13	22	0.00296559	0.0312985	0.307692
NM_001013838	chr16	67648893	67648974	exons_3	1	0	31	42	1.92666e-23	7.3575e-21	-1
NM_012320	chr16	68259146	68261058	exons_1	0.571429	1	14	21	0.00032015	0.00412863	0.428571
NM_001317186	chr16	68815760	68822000	introns_1	0.921053	0.422222	38	45	5.34906e-07	1.05582e-05	-0.49883
NM_001317185	chr16	68819280	68819425	exons_1	0.921053	0.422222	38	45	5.34906e-07	1.05582e-05	-0.49883
NM_001318391	chr16	69136696	69136887	exons_2	0.615385	1	13	23	0.000628863	0.00772131	0.384615
NM_001270974	chr16	70943812	70943949	exons_45	0.0833333	1	12	23	1.38487e-09	5.04156e-08	0.916667
NM_024306	chr16	74740116	74774485	introns_6	0.933333	0	15	16	2.77392e-09	9.13831e-08	-0.933333
NM_017429	chr16	81262284	81264639	introns_4	0.0769231	0.791667	13	24	1.04086e-05	0.000166324	0.714744
NM_145168	chr16	82000885	82011386	introns_2	0	0.9375	13	16	1.08275e-08	3.04667e-07	0.9375
NM_001257	chr16	83217498	83344861	introns_1	0.74359	0.97561	39	41	0.00136066	0.0155723	0.23202
NM_001257	chr16	83678462	83748107	introns_3	0.315789	1	19	17	1.32054e-06	2.44411e-05	0.684211
NM_001303451	chr16	84656871	84657913	exons_3	0.0357143	0.970588	28	34	1.88689e-16	3.07022e-14	0.934874
NM_024731	chr16	84656871	84657944	exons_1	0.0357143	0.970588	28	34	1.88689e-16	3.07022e-14	0.934874
NR_106832	chr16	85917346	85919346	promoters	0	0.952381	12	21	1.7708e-09	6.20509e-08	0.952381
NM_001363908	chr16	85918417	85918803	exons_1	0	0.952381	12	21	1.7708e-09	6.20509e-08	0.952381
NR_135183	chr16	86722132	86734825	introns_1	0.928571	0.0416667	14	24	4.2678e-09	1.33321e-07	-0.886905
NR_135182	chr16	86727968	86734825	introns_2	0.928571	0.0416667	14	24	4.2678e-09	1.33321e-07	-0.886905
NR_104667	chr16	87273385	87290718	introns_2	0.533333	0.95	15	20	0.00275985	0.0293256	0.416667
NM_015144	chr16	87413055	87413195	exons_3	0.642857	1	14	18	0.00206781	0.0226805	0.357143
NR_148997	chr16	88530053	88532053	promoters	0.952381	0.333333	21	12	8.90433e-05	0.00122875	-0.619048
NM_153813	chr16	88532002	88532235	exons_1	0.952381	0.333333	21	12	8.90433e-05	0.00122875	-0.619048
NM_001323543	chr16	88841972	88856757	introns_12	1	0.52381	12	21	0.000726374	0.00882019	-0.47619
NM_001323544	chr16	88841972	88842705	introns_1	1	0.52381	12	21	0.000726374	0.00882019	-0.47619
[truncated: 1,167 more rows]

## Sheet: Table S6
Supplementary Table 6. The details of the DMPs, DMEs and DMIs for human and rat comparison using RRBS dataset.
[truncated: 1,011 more rows]

[truncated: 10 more sheets: Table S7, Table S8, Table S9, Table S10, Table S11, Table S12, Table S13, Table S14, Table S15, Table S16]
